# Supplementary material for: Phosphoproteomic insights into the regulation of root length in rice (Oryza sativa L. cv. KDML 105): uncovering key events and pathways involving phosphorylated proteins
Source: PeerJ. 2025 Jul 4;13:e19361. doi: 10.7717/peerj.19361 (PMC12232931; doi:10.7717/peerj.19361)
Supplement: Supplemental Information 2 — Deep water culture (DWC), water agar (WA), and vermiculite-based hydroponics (VBH). [file peerj-13-19361-s002.xlsx]

## Sheet: Table S1
Table S1: The raw data shows all identified phosphoproteins from rice roots grown in cultivation systems of deep water culture (DWC), water agar (WA), and vermiculite-based hydroponics (VBH).
T: Majority protein IDs	Entry Name	Protein names	Gene Names	Organism	Gene Ontology (biological process)	Gene Ontology (cellular component)	Gene Ontology (molecular function)	T: Peptide sequences	N: Q-value	N: Score	Intensity 1-1	Intensity 1-2	Intensity 1-3	Intensity 2-1	Intensity 2-2	Intensity 2-3	Intensity 3-1	Intensity 3-2	Intensity 3-3	Intensity 4-1	Intensity 4-2	Intensity 4-3	Intensity 5-1	Intensity 5-2	Intensity 5-3	Intensity 6-1	Intensity 6-2	Intensity 6-3	Intensity 7-1	Intensity 7-2	Intensity 7-3	Intensity 8-1	Intensity 8-2	Intensity 8-3	Intensity 9-1	Intensity 9-2	Intensity 9-3
Lable											WA	WA	WA	WA	WA	WA	WA	WA	WA	DWC	DWC	DWC	DWC	DWC	DWC	DWC	DWC	DWC	VBH	VBH	VBH	VBH	VBH	VBH	VBH	VBH	VBH
A0A023SGH8	A0A023SGH8_ORYSJ	Cyclin-like F-box domain containing protein		Oryza sativa subsp. japonica (Rice)				LHQLRYLCVRK	0.9784	-6.3608	0	0	0	0	0	0	0	0	0	0	0	0	0	0	0	0	0	0	0	0	0	0	0	0	0	0	0
A0A060BLI7	A0A060BLI7_ORYSJ	NAC transcription factor	NAC20	Oryza sativa subsp. japonica (Rice)	regulation of DNA-templated transcription [GO:0006355]		DNA binding [GO:0003677]	WYFFTPRDR	0.97256	-2.4684	0	0	0	0	0	0	0	0	0	0	0	0	0	0	0	0	0	0	10.2543	0	0	0	0	0	0	0	0
A0A060NGW8	A0A060NGW8_ORYSJ	Pikahei-1(T) protein	Pikahei-1(t)	Oryza sativa subsp. japonica (Rice)	defense response [GO:0006952]; response to other organism [GO:0051707]		ADP binding [GO:0043531]; ATP binding [GO:0005524]	FVYRDQR	0.98642	-9.7644	0	0	0	0	0	0	0	0	0	0	0	0	0	0	0	11.0591	0	0	0	0	0	10.1392	0	0	0	0	0
A0A0F7QZZ2	A0A0F7QZZ2_ORYSJ	Ent-beyerene synthase	OsKSL2	Oryza sativa subsp. japonica (Rice)	diterpenoid biosynthetic process [GO:0016102]		magnesium ion binding [GO:0000287]; terpene synthase activity [GO:0010333]	HLVEIWQELLR	0.97638	-4.4258	0	0	0	0	0	0	8.81813	0	0	0	0	0	0	0	0	0	0	0	0	0	0	0	0	0	0	0	0
A0A0H5AJF7	A0A0H5AJF7_ORYSJ	NB-LRR protein	HWC2 OsJ_16212	Oryza sativa subsp. japonica (Rice)	defense response [GO:0006952]; response to other organism [GO:0051707]		ADP binding [GO:0043531]; ATP binding [GO:0005524]; DNA binding [GO:0003677]; metal ion binding [GO:0046872]	AHPSLNIIGQK	0.9724	-2.5454	0	0	0	0	0	0	0	0	0	0	0	0	0	0	0	0	0	0	0	0	0	0	0	0	0	0	0
A0A0K0LR65	A0A0K0LR65_ORYSJ	NAD(P)H-quinone oxidoreductase subunit K, chloroplastic (EC 7.1.1.-) (NAD(P)H dehydrogenase subunit K) (NADH-plastoquinone oxidoreductase subunit K)	ndhK	Oryza sativa subsp. japonica (Rice)	photosynthesis, light reaction [GO:0019684]	chloroplast thylakoid membrane [GO:0009535]	4 iron, 4 sulfur cluster binding [GO:0051539]; iron ion binding [GO:0005506]; NADH dehydrogenase (ubiquinone) activity [GO:0008137]; quinone binding [GO:0048038]	CFTTSHKLYVRR	0.97072	-2.4404	0	0	0	0	0	0	0	0	0	0	0	0	0	9.54957	0	0	0	0	0	0	0	0	0	0	0	0	0
A0A0K0LR80	A0A0K0LR80_ORYSJ	Ribosomal protein S12	rps12	Oryza sativa subsp. japonica (Rice)	translation [GO:0006412]	chloroplast [GO:0009507]; small ribosomal subunit [GO:0015935]	structural constituent of ribosome [GO:0003735]	PTVKQLIRNAR	0.97992	-16.853	0	0	0	0	0	0	0	0	0	0	0	0	0	0	0	0	0	0	0	0	0	0	0	0	0	0	0
A0A0K2SR05	A0A0K2SR05_ORYSJ	50S ribosomal protein L16, chloroplastic	rpl16	Oryza sativa subsp. japonica (Rice)	translation [GO:0006412]	chloroplast [GO:0009507]; ribonucleoprotein complex [GO:1990904]; ribosome [GO:0005840]	rRNA binding [GO:0019843]; structural constituent of ribosome [GO:0003735]	YARRGGK	1.0315	-0.00052908	0	0	0	0	0	0	0	0	0	0	0	0	0	0	0	0	0	0	0	0	0	14.1059	0	0	0	0	0
A0A0N7KC81	A0A0N7KC81_ORYSJ	Os01g0116101 protein	Os01g0116101 OSNPB_010116101	Oryza sativa subsp. japonica (Rice)				EQHTLVYR	0.97635	-3.735	0	0	0	0	0	0	0	0	0	0	0	0	0	0	0	0	0	0	0	0	0	0	0	0	0	0	0
A0A0N7KC98	A0A0N7KC98_ORYSJ	Os01g0131250 protein	Os01g0131250 OSNPB_010131250	Oryza sativa subsp. japonica (Rice)				SSRLHMPRSTGWK	0.9696	-2.2492	0	0	0	0	9.4731	0	0	0	0	0	0	0	0	0	0	0	0	0	0	0	0	0	0	0	0	0	0
A0A0N7KCA2	A0A0N7KCA2_ORYSJ	Os01g0134200 protein	Os01g0134200 OSNPB_010134200	Oryza sativa subsp. japonica (Rice)				RNPWPPAWLGWK	0.97806	-7.7702	0	0	0	0	0	0	0	0	0	0	0	0	0	0	0	0	0	0	0	0	0	0	0	0	0	0	0
A0A0N7KCB4	A0A0N7KCB4_ORYSJ	Os01g0143750 protein	Os01g0143750 OSNPB_010143750	Oryza sativa subsp. japonica (Rice)				YSCKNFAAMGVIPR	0.9706	-0.1146	0	0	0	0	0	0	0	10.0922	0	0	0	0	0	0	0	0	0	0	0	0	0	0	0	0	0	0	0
A0A0N7KCF3	A0A0N7KCF3_ORYSJ	procollagen-proline 4-dioxygenase (EC 1.14.11.2)	Os01g0174500 OSNPB_010174500	Oryza sativa subsp. japonica (Rice)		endoplasmic reticulum [GO:0005783]	procollagen-proline 4-dioxygenase activity [GO:0004656]	SSSGAHR	0.9721	-2.0335	0	0	0	0	0	0	0	0	0	0	0	11.0863	0	0	0	0	0	0	0	0	0	0	0	0	0	0	0
A0A0N7KCH6	A0A0N7KCH6_ORYSJ	Os01g0193250 protein	Os01g0193250 OSNPB_010193250	Oryza sativa subsp. japonica (Rice)				QVVVVVVAELGVGGLAPRAR	0.97774	-18.702	0	0	0	0	0	0	0	0	0	0	0	0	0	0	0	0	0	0	0	0	0	0	0	10.7665	0	0	0
A0A0N7KCI1	A0A0N7KCI1_ORYSJ	Os01g0198200 protein	Os01g0198200 OSNPB_010198200	Oryza sativa subsp. japonica (Rice)	protein phosphorylation [GO:0006468]		ATP binding [GO:0005524]; protein kinase activity [GO:0004672]	GFLVCKK	0.98051	-0.37051	0	0	0	0	0	0	0	14.6152	0	0	14.5414	0	0	0	0	0	0	0	0	0	0	0	0	0	0	0	0
A0A0N7KCI7	A0A0N7KCI7_ORYSJ	Os01g0203900 protein	Os01g0203900 OSNPB_010203900	Oryza sativa subsp. japonica (Rice)				ELQLRVR	0.98603	-11.724	0	0	0	0	0	0	0	0	0	0	0	0	0	15.7186	0	0	0	0	0	0	15.558	9.19628	0	0	0	9.24165	0
A0A0N7KCJ3	A0A0N7KCJ3_ORYSJ	Os01g0209901 protein	Os01g0209901 OSNPB_010209901	Oryza sativa subsp. japonica (Rice)				AGPGVHQREHR	0.98201	-15.64	0	0	0	0	0	0	9.37658	0	0	0	0	0	0	0	0	0	0	0	0	0	0	11.5137	0	0	0	0	0
A0A0N7KCJ6	A0A0N7KCJ6_ORYSJ	Os01g0212900 protein	Os01g0212900 OSNPB_010212900	Oryza sativa subsp. japonica (Rice)				LSTRWFA	1.0409	-0.00052908	0	0	0	0	0	0	0	0	0	0	0	0	0	0	0	0	0	0	0	0	0	0	0	0	0	0	0
A0A0N7KCJ7	A0A0N7KCJ7_ORYSJ	Os01g0214300 protein	Os01g0214300 OSNPB_010214300	Oryza sativa subsp. japonica (Rice)				SISKNKR	1.04	-0.00052908	0	0	0	0	0	0	0	0	0	0	0	0	0	0	0	0	0	0	0	0	0	0	0	0	0	0	0
A0A0N7KCK4	A0A0N7KCK4_ORYSJ	Os01g0220150 protein	Os01g0220150 OSNPB_010220150	Oryza sativa subsp. japonica (Rice)				VAPQDVVHLR	0.97465	-4.5402	0	0	0	0	0	0	0	0	0	0	0	0	0	0	0	0	0	0	0	0	0	0	0	0	0	0	0
A0A0N7KCL1	A0A0N7KCL1_ORYSJ	Os01g0226500 protein	Os01g0226500 OSNPB_010226500	Oryza sativa subsp. japonica (Rice)				HFVELARAMK	0.97226	-3.2084	0	0	0	0	0	0	0	11.1587	0	0	0	0	0	0	0	0	0	0	0	0	0	0	0	0	0	0	0
A0A0N7KCS8	A0A0N7KCS8_ORYSJ	Os01g0291101 protein	Os01g0291101 OSNPB_010291101	Oryza sativa subsp. japonica (Rice)				MPPRDARER	0.97027	-2.4689	0	0	0	0	0	0	0	0	0	0	0	0	0	0	0	0	0	0	0	0	0	0	0	0	0	0	13.9005
A0A0N7KCT2	A0A0N7KCT2_ORYSJ	Os01g0296450 protein	Os01g0296450 OSNPB_010296450	Oryza sativa subsp. japonica (Rice)				EGHLDGGAR	0.97792	-7.6372	0	0	0	9.3535	0	0	0	0	0	0	0	0	0	0	0	0	0	0	0	0	12.1558	0	0	0	0	0	0
A0A0N7KCU3	A0A0N7KCU3_ORYSJ	Os01g0310500 protein	Os01g0310500 OSNPB_010310500	Oryza sativa subsp. japonica (Rice)	cell surface receptor signaling pathway [GO:0007166]; protein phosphorylation [GO:0006468]	plasma membrane [GO:0005886]	ATP binding [GO:0005524]; protein serine/threonine kinase activity [GO:0004674]	EKLPLHLR	0.98086	-1.7021	0	0	0	0	0	0	0	0	0	0	0	0	0	0	0	0	0	0	0	11.1669	0	0	0	11.4474	10.7375	0	0
A0A0N7KCV0	A0A0N7KCV0_ORYSJ	Os01g0319066 protein	Os01g0319066 OSNPB_010319066	Oryza sativa subsp. japonica (Rice)				RATIPGGRQLGLAVSEAR	0.98228	-10.393	0	0	0	0	0	0	0	0	0	0	0	0	0	0	0	0	0	0	0	0	0	0	0	0	0	0	0
A0A0N7KCV7	A0A0N7KCV7_ORYSJ	Os01g0328101 protein	Os01g0328101 OSNPB_010328101	Oryza sativa subsp. japonica (Rice)				RGRPRWR	1.0334	-0.00052908	0	0	0	0	0	0	0	10.2292	0	0	0	0	0	0	0	0	0	0	0	0	0	0	0	0	0	0	0
A0A0N7KCY6	A0A0N7KCY6_ORYSJ	Os01g0363750 protein	Os01g0363750 OSNPB_010363750	Oryza sativa subsp. japonica (Rice)				TGLIYCVATRR	0.98481	-8.0623	0	0	0	0	0	0	0	0	0	0	0	0	0	0	0	0	0	0	0	0	15.7349	0	0	0	0	0	0
A0A0N7KCZ1	A0A0N7KCZ1_ORYSJ	Potassium transporter	Os01g0369300 OSNPB_010369300	Oryza sativa subsp. japonica (Rice)		membrane [GO:0016020]	potassium ion transmembrane transporter activity [GO:0015079]	EFRMYRCVVR	0.97803	-6.8113	0	0	0	0	0	0	0	0	0	0	10.2463	10.3107	0	0	0	0	0	0	0	0	0	0	0	0	0	0	0
A0A0N7KD07	A0A0N7KD07_ORYSJ	Os01g0392800 protein	Os01g0392800 OSNPB_010392800	Oryza sativa subsp. japonica (Rice)		membrane [GO:0016020]		FYFHFQDYVDLIIWK	0.98328	-10.701	0	0	0	0	0	0	0	0	0	0	0	0	0	0	0	0	0	0	0	0	0	0	0	0	8.93481	0	0
A0A0N7KD25	A0A0N7KD25_ORYSJ	Os01g0518701 protein	Os01g0518701 OSNPB_010518701	Oryza sativa subsp. japonica (Rice)				FGVPVLERR	0.97413	-2.4684	0	0	0	0	0	0	0	0	0	0	0	0	0	0	10.2755	0	0	0	0	0	10.5569	0	0	0	0	0	0
A0A0N7KD78	A0A0N7KD78_ORYSJ	Os01g0580150 protein	Os01g0580150 OSNPB_010580150	Oryza sativa subsp. japonica (Rice)	cell surface receptor signaling pathway [GO:0007166]; protein phosphorylation [GO:0006468]	plasma membrane [GO:0005886]	ATP binding [GO:0005524]; protein kinase activity [GO:0004672]	MVQGTPGYLDPEYLKK	0.96943	-2.1121	0	0	0	0	0	0	9.29177	0	0	0	0	0	0	0	0	0	0	0	0	0	0	0	0	0	0	0	0
A0A0N7KD85	A0A0N7KD85_ORYSJ	Os01g0587150 protein	Os01g0587150 OSNPB_010587150	Oryza sativa subsp. japonica (Rice)				AEVVHPRQQRR	0.97984	-8.0623	0	0	0	0	0	0	0	0	0	0	0	0	0	0	0	0	0	0	0	15.0576	0	0	0	0	0	14.7154	0
A0A0N7KD92	A0A0N7KD92_ORYSJ	Os01g0594100 protein	Os01g0594100 OSNPB_010594100	Oryza sativa subsp. japonica (Rice)				ACPSSRR	0.98885	-0.00052908	0	0	0	0	0	0	0	0	0	0	0	0	0	0	0	0	0	0	0	0	0	0	0	0	0	0	0
A0A0N7KD97	A0A0N7KD97_ORYSJ	Os01g0598901 protein	Os01g0598901 OSNPB_010598901	Oryza sativa subsp. japonica (Rice)				AAKFCFRR	0.97334	-1.7021	12.1055	0	0	0	0	0	0	0	0	0	0	0	0	0	0	0	0	0	0	0	0	0	0	0	0	0	0
A0A0N7KDA0	A0A0N7KDA0_ORYSJ	Os01g0602200 protein	Os01g0602200 OSNPB_010602200	Oryza sativa subsp. japonica (Rice)		membrane [GO:0016020]	heme binding [GO:0020037]; iron ion binding [GO:0005506]; monooxygenase activity [GO:0004497]; oxidoreductase activity, acting on paired donors, with incorporation or reduction of molecular oxygen [GO:0016705]	LHPPFIEIGWKTYK	0.98309	-14.587	0	0	0	0	0	0	0	0	9.59789	0	0	0	0	0	0	0	0	0	0	0	0	0	0	0	0	0	0
A0A0N7KDC5	A0A0N7KDC5_ORYSJ	Os01g0623550 protein	Os01g0623550 OSNPB_010623550	Oryza sativa subsp. japonica (Rice)				TPLHGFKRPPLKK	0.98455	-9.2834	0	0	0	0	0	0	0	0	0	0	0	0	0	0	0	0	0	0	0	0	0	0	9.37721	0	0	0	0
A0A0N7KDD1	A0A0N7KDD1_ORYSJ	Os01g0629500 protein	Os01g0629500 OSNPB_010629500	Oryza sativa subsp. japonica (Rice)				REHLSWRTQTR	0.98448	-8.0623	0	0	0	0	0	0	0	0	0	0	0	0	0	0	0	0	0	0	0	0	0	0	0	0	0	0	0
A0A0N7KDI4	A0A0N7KDI4_ORYSJ	Os01g0680950 protein	Os01g0680950 OSNPB_010680950	Oryza sativa subsp. japonica (Rice)				DHHPQHVVLPLR	0.97644	-3.3757	0	0	14.7434	0	0	0	0	0	16.0074	0	0	0	0	0	0	0	0	0	0	0	0	0	0	0	0	0	11.6925
A0A0N7KDJ4	A0A0N7KDJ4_ORYSJ	Os01g0689451 protein	Os01g0689451 OSNPB_010689451	Oryza sativa subsp. japonica (Rice)	iron ion homeostasis [GO:0055072]		zinc ion binding [GO:0008270]	AGDVGALAERCR	0.97661	-3.4818	0	0	0	0	0	0	0	0	0	0	0	0	0	0	0	0	0	0	9.49043	0	0	0	0	0	0	0	0
A0A0N7KDK5	A0A0N7KDK5_ORYSJ	Os01g0698850 protein	Os01g0698850 OSNPB_010698850	Oryza sativa subsp. japonica (Rice)				VQVGPRR	1.0123	-0.00052908	0	15.4486	0	0	0	15.4954	0	15.5543	0	15.1379	0	0	0	0	15.6799	0	15.6234	0	0	0	0	0	0	0	0	0	0
A0A0N7KDK7	A0A0N7KDK7_ORYSJ	Os01g0700500 protein	Os01g0700500 OSNPB_010700500	Oryza sativa subsp. japonica (Rice)		membrane [GO:0016020]	heme binding [GO:0020037]; iron ion binding [GO:0005506]; monooxygenase activity [GO:0004497]; oxidoreductase activity, acting on paired donors, with incorporation or reduction of molecular oxygen [GO:0016705]	LAREVLR	1.0114	-0.00052908	0	0	0	0	0	0	0	0	0	0	0	0	0	0	0	0	0	0	10.2256	0	0	10.7008	0	0	0	0	0
A0A0N7KDM2	A0A0N7KDM2_ORYSJ	Os01g0714200 protein	Os01g0714200 OSNPB_010714200	Oryza sativa subsp. japonica (Rice)				LSMNTGTGRVADAVR	0.98482	-12.402	0	0	0	0	0	0	0	0	0	0	0	0	0	0	0	0	0	0	0	0	0	0	0	0	0	0	0
A0A0N7KDN2	A0A0N7KDN2_ORYSJ	Os01g0721750 protein	Os01g0721750 OSNPB_010721750	Oryza sativa subsp. japonica (Rice)				LPEYRRITR	0.96758	-1.3911	0	0	0	8.58815	0	0	0	0	0	0	0	0	0	0	0	0	0	0	0	0	0	0	0	0	0	0	0
A0A0N7KDQ2	A0A0N7KDQ2_ORYSJ	Os01g0738500 protein	Os01g0738500 OSNPB_010738500	Oryza sativa subsp. japonica (Rice)	intracellular signal transduction [GO:0035556]; lipid metabolic process [GO:0006629]; meristem maintenance [GO:0010073]		phosphatidylinositol phospholipase C activity [GO:0004435]	VGTYSWGSAVLAFLYR	0.98139	-10.686	0	0	0	0	0	0	0	0	10.2898	0	0	0	0	0	0	0	0	0	0	0	0	0	0	0	0	0	0
A0A0N7KDQ5	A0A0N7KDQ5_ORYSJ	Os01g0740700 protein	Os01g0740700 OSNPB_010740700	Oryza sativa subsp. japonica (Rice)				QRRPNRRPCNR	0.97037	-2.5454	0	0	0	0	0	0	0	0	0	0	0	0	0	0	0	0	0	0	9.27415	0	9.39247	0	0	0	0	0	0
A0A0N7KDU7	A0A0N7KDU7_ORYSJ	Os01g0776800 protein	Os01g0776800 OSNPB_010776800	Oryza sativa subsp. japonica (Rice)		membrane [GO:0016020]		LSVTEFIRDK	0.98436	-8.5133	0	0	0	0	12.5858	0	0	0	0	0	0	0	0	0	0	0	0	0	0	0	0	0	0	0	0	0	0
A0A0N7KDV1	A0A0N7KDV1_ORYSJ	Os01g0780701 protein	Os01g0780701 OSNPB_010780701	Oryza sativa subsp. japonica (Rice)				MERPKLAALLHHRR	0.98739	-10.086	0	0	0	0	0	0	0	11.0185	0	0	0	0	0	0	0	0	0	0	0	0	0	0	0	0	0	0	0
A0A0N7KDY7	A0A0N7KDY7_ORYSJ	Calcium uniporter protein	Os01g0817000 B1148D12.16 P0454H12.5	Oryza sativa subsp. japonica (Rice)	mitochondrial calcium ion homeostasis [GO:0051560]	mitochondrial inner membrane [GO:0005743]	calcium channel activity [GO:0005262]; uniporter activity [GO:0015292]	LFESRQKK	0.97556	-25.79	0	13.0166	10.9337	0	0	0	0	0	0	0	0	0	0	0	0	0	0	0	0	0	0	0	0	0	13.247	0	0
A0A0N7KDZ7	A0A0N7KDZ7_ORYSJ	Os01g0825166 protein (Os01g0825332 protein)	Os01g0825166 Os01g0825332 OSNPB_010825166 OSNPB_010825332	Oryza sativa subsp. japonica (Rice)				KVAARLGMTTTTVLR	0.98393	-10.701	0	0	0	0	0	0	0	0	0	0	0	0	0	0	0	0	0	0	0	0	0	0	0	0	0	0	0
A0A0N7KE20	A0A0N7KE20_ORYSJ	Os01g0845000 protein	Os01g0845000 OSNPB_010845000	Oryza sativa subsp. japonica (Rice)				VDSRRPVSPRDRPGR	0.97609	-1.2684	0	0	0	0	0	0	0	0	0	0	0	0	0	0	0	0	10.8875	0	0	0	0	0	0	0	0	0	0
A0A0N7KE29	A0A0N7KE29_ORYSJ	Os01g0852900 protein	Os01g0852900 OSNPB_010852900	Oryza sativa subsp. japonica (Rice)				VYSEIIK	0.96689	-2.0335	0	0	0	0	0	0	0	0	0	0	0	0	0	0	11.669	0	0	0	0	0	0	0	0	0	0	0	0
A0A0N7KE35	A0A0N7KE35_ORYSJ	Os01g0857900 protein	Os01g0857900 OSNPB_010857900	Oryza sativa subsp. japonica (Rice)				MATSSWYR	0.97899	-3.735	0	0	0	0	0	0	0	0	0	10.5381	0	0	0	0	0	0	0	0	0	0	0	0	0	0	0	0	0
A0A0N7KE50	A0A0N7KE50_ORYSJ	Os01g0870100 protein	Os01g0870100 OSNPB_010870100	Oryza sativa subsp. japonica (Rice)	ion transport [GO:0006811]	nuclear membrane [GO:0031965]		ELKSPLR	0.97645	-3.7939	0	0	0	0	0	0	0	0	0	0	0	0	0	0	0	0	0	0	0	0	0	0	0	10.9224	0	0	0
A0A0N7KE55	A0A0N7KE55_ORYSJ	non-specific serine/threonine protein kinase (EC 2.7.11.1)	Os01g0872800 OSNPB_010872800	Oryza sativa subsp. japonica (Rice)	protein phosphorylation [GO:0006468]		ATP binding [GO:0005524]; protein serine/threonine kinase activity [GO:0004674]	IVLDQLDHPGVIR	0.98581	-10.086	0	0	0	0	0	0	0	0	0	0	9.99464	0	0	0	0	0	0	0	0	0	0	0	0	0	0	0	0
A0A0N7KE63	A0A0N7KE63_ORYSJ	Os01g0879000 protein	Os01g0879000 OSNPB_010879000	Oryza sativa subsp. japonica (Rice)				RQRAAATVTEGK	0.98468	-11.174	0	0	0	0	0	0	0	0	0	0	0	0	0	0	0	14.3916	0	14.6774	0	15.2795	0	0	0	0	14.743	0	0
A0A0N7KE71	A0A0N7KE71_ORYSJ	Os01g0885300 protein	Os01g0885300 OSNPB_010885300	Oryza sativa subsp. japonica (Rice)				SINMGTK	1.091	-0.00052908	0	0	0	0	0	0	0	0	0	0	0	0	0	0	0	0	8.5922	0	0	0	0	0	0	0	0	0	0
A0A0N7KE74	A0A0N7KE74_ORYSJ	Os01g0887850 protein	Os01g0887850 OSNPB_010887850	Oryza sativa subsp. japonica (Rice)				ARGNGGG	0.98488	-13.907	0	0	8.89594	0	7.89142	8.22453	8.39339	0	9.08762	9.72892	0	0	0	8.43846	8.80332	0	0	9.81178	8.08257	8.97332	8.19461	0	8.56247	8.78836	0	0	8.80403
A0A0N7KE92	A0A0N7KE92_ORYSJ	Os01g0903100 protein	Os01g0903100 OSNPB_010903100	Oryza sativa subsp. japonica (Rice)				EPPHRRPR	0.98412	-1.7021	0	0	0	0	0	0	0	0	0	0	0	0	0	0	0	0	0	0	0	0	0	0	0	0	0	0	0
A0A0N7KE93	A0A0N7KE93_ORYSJ	Os01g0904200 protein	Os01g0904200 OSNPB_010904200	Oryza sativa subsp. japonica (Rice)				GIDPGGK	1.0889	-0.00052908	0	0	8.36278	0	0	0	0	0	0	0	0	0	0	0	0	0	0	0	0	0	0	0	0	0	0	0	0
A0A0N7KEF8	A0A0N7KEF8_ORYSJ	Os01g0957500 protein	Os01g0957500 OSNPB_010957500	Oryza sativa subsp. japonica (Rice)				REDDVAGAVGEDARR	0.98471	-12.402	0	0	0	0	0	0	9.15119	0	0	0	0	0	0	0	0	0	0	0	0	0	0	0	0	0	0	0	0
A0A0N7KEI6	A0A0N7KEI6_ORYSJ	Os02g0102000 protein	Os02g0102000 OSNPB_020102000	Oryza sativa subsp. japonica (Rice)				RRQLCPLLAR	0.97198	-3.2084	0	0	0	0	0	0	0	0	0	0	0	0	0	0	0	12.4766	0	0	0	0	0	0	0	0	0	10.3425	0
A0A0N7KEM0	A0A0N7KEM0_ORYSJ	RING-type E3 ubiquitin transferase (EC 2.3.2.27)	Os02g0128800 OSNPB_020128800	Oryza sativa subsp. japonica (Rice)	protein ubiquitination [GO:0016567]; ubiquitin-dependent protein catabolic process [GO:0006511]	cytoplasm [GO:0005737]	transferase activity [GO:0016740]; zinc ion binding [GO:0008270]	DSHKKVR	1.0773	-0.00052908	0	0	0	0	0	0	0	0	0	0	0	0	0	0	0	0	0	0	0	0	0	0	0	0	0	0	0
A0A0N7KEN1	A0A0N7KEN1_ORYSJ	histone acetyltransferase (EC 2.3.1.48)	Os02g0137500 OSNPB_020137500	Oryza sativa subsp. japonica (Rice)	histone acetylation [GO:0016573]; regulation of DNA-templated transcription [GO:0006355]	nucleus [GO:0005634]	histone acetyltransferase activity [GO:0004402]; zinc ion binding [GO:0008270]	DAMLMHK	0.97168	-2.0335	10.7646	0	0	0	0	0	0	0	0	0	0	9.08791	0	0	0	0	0	0	0	0	0	0	0	0	0	0	0
A0A0N7KER2	A0A0N7KER2_ORYSJ	Os02g0163000 protein	Os02g0163000 OSNPB_020163000	Oryza sativa subsp. japonica (Rice)			nucleic acid binding [GO:0003676]; RNA-DNA hybrid ribonuclease activity [GO:0004523]	TTNQVDK	0.9686	-2.0335	0	0	0	0	0	0	0	0	0	0	0	0	0	0	0	0	0	0	0	0	0	0	0	0	0	0	0
A0A0N7KET2	A0A0N7KET2_ORYSJ	Os02g0179250 protein	Os02g0179250 OSNPB_020179250	Oryza sativa subsp. japonica (Rice)		membrane [GO:0016020]		FINTYINVGNIRK	0.97432	-2.2493	0	0	0	0	0	0	12.4851	0	0	0	0	0	0	0	0	0	0	0	0	0	0	0	0	0	0	0	0
A0A0N7KET9	A0A0N7KET9_ORYSJ	Os02g0185350 protein	Os02g0185350 OSNPB_020185350	Oryza sativa subsp. japonica (Rice)				AEQLHHGDLAQLPPQR	0.96864	-2.916	0	0	0	0	0	0	0	0	0	0	0	0	0	0	0	0	0	0	0	0	0	0	0	0	0	0	0
A0A0N7KEV3	A0A0N7KEV3_ORYSJ	Os02g0196300 protein	Os02g0196300 OSNPB_020196300	Oryza sativa subsp. japonica (Rice)	chloroplast organization [GO:0009658]	chloroplast envelope [GO:0009941]; plastid outer membrane [GO:0009527]		FLDRRTGEPTVGK	0.98421	-10.985	0	0	0	10.641	0	0	0	0	0	0	0	0	0	0	0	0	0	0	0	0	0	0	0	0	0	0	0
A0A0N7KEV4	A0A0N7KEV4_ORYSJ	Os02g0197050 protein	Os02g0197050 OSNPB_020197050	Oryza sativa subsp. japonica (Rice)				RCLLRHGCDNLR	0.9734	-3.4819	0	0	0	0	0	0	0	0	0	0	0	0	0	0	0	0	0	0	9.97054	0	0	0	0	0	0	0	0
A0A0N7KEW3	A0A0N7KEW3_ORYSJ	Glycosyltransferase (EC 2.4.1.-)	Os02g0203300 OSNPB_020203300	Oryza sativa subsp. japonica (Rice)			quercetin 3-O-glucosyltransferase activity [GO:0080043]; quercetin 7-O-glucosyltransferase activity [GO:0080044]	LVAGWGVGVR	0.97488	-36.544	0	0	0	0	0	0	0	0	0	0	0	0	0	0	0	0	0	0	9.697	0	0	0	0	0	0	0	0
A0A0N7KEW7	A0A0N7KEW7_ORYSJ	Os02g0208150 protein	Os02g0208150 OSNPB_020208150	Oryza sativa subsp. japonica (Rice)				SGVGVGR	1.0972	-0.00052908	0	16.4356	16.4984	11.7589	15.5997	15.6913	0	0	16.0588	0	0	16.1458	0	0	0	0	17.0098	0	16.7505	12.5549	0	0	0	0	16.2191	16.3289	0
A0A0N7KEW8	A0A0N7KEW8_ORYSJ	Os02g0208650 protein	Os02g0208650 OSNPB_020208650	Oryza sativa subsp. japonica (Rice)				WIPARTMERWR	0.97393	-3.1204	0	0	0	0	0	0	0	0	0	0	0	0	0	0	9.33631	0	0	0	0	0	0	0	0	0	0	0	0
A0A0N7KEW9	A0A0N7KEW9_ORYSJ	Os02g0209100 protein	Os02g0209100 OSNPB_020209100	Oryza sativa subsp. japonica (Rice)	intracellular protein transport [GO:0006886]; vesicle-mediated transport [GO:0016192]	membrane coat [GO:0030117]	structural molecule activity [GO:0005198]	KSIRPPFSAER	0.97941	-8.0623	0	0	0	0	0	0	12.8265	0	0	0	0	0	0	0	0	0	0	0	0	0	0	0	13.8814	0	0	0	0
A0A0N7KEX1	A0A0N7KEX1_ORYSJ	Os02g0211600 protein	Os02g0211600 OSNPB_020211600	Oryza sativa subsp. japonica (Rice)	protein phosphorylation [GO:0006468]	membrane [GO:0016020]	ATP binding [GO:0005524]; protein kinase activity [GO:0004672]	IQTLERLVLTYNK	0.98588	-9.2834	0	0	0	0	0	0	0	0	0	10.7244	0	0	0	0	0	0	0	0	0	0	0	0	0	0	0	0	0
A0A0N7KEX5	A0A0N7KEX5_ORYSJ	Os02g0215200 protein	Os02g0215200 OSNPB_020215200	Oryza sativa subsp. japonica (Rice)			histone deacetylase activity [GO:0004407]; metal ion binding [GO:0046872]	HPRAPQAP	0.98457	-11.174	0	0	0	0	0	0	12.6606	0	0	0	0	0	0	0	0	0	0	0	0	0	0	0	0	0	0	0	0
A0A0N7KF04	A0A0N7KF04_ORYSJ	Os02g0245100 protein	Os02g0245100 OSNPB_020245100	Oryza sativa subsp. japonica (Rice)				ALQPVPRAAPPRGR	0.98122	-6.4754	0	0	0	0	0	0	0	0	0	0	0	0	0	0	0	0	0	0	10.2653	0	0	0	9.49739	0	0	0	0
A0A0N7KF46	A0A0N7KF46_ORYSJ	Os02g0293050 protein	Os02g0293050 OSNPB_020293050	Oryza sativa subsp. japonica (Rice)				HDVVPDR	0.95293	-0.0010582	0	0	0	0	0	0	0	0	0	0	0	0	0	0	0	0	0	0	0	0	9.62987	0	0	0	0	0	0
A0A0N7KF60	A0A0N7KF60_ORYSJ	Os02g0310400 protein	Os02g0310400 OSNPB_020310400	Oryza sativa subsp. japonica (Rice)				GGASLVGEPHASR	0.98551	-9.2834	0	0	0	0	0	0	0	0	0	0	0	0	0	0	0	0	0	0	0	0	10.0325	0	0	0	0	0	0
A0A0N7KF99	A0A0N7KF99_ORYSJ	protein-serine/threonine phosphatase (EC 3.1.3.16)	Os02g0471500 OSNPB_020471500	Oryza sativa subsp. japonica (Rice)	protein dephosphorylation [GO:0006470]		myosin phosphatase activity [GO:0017018]	LLVESAHRAWR	0.98508	-8.0623	0	0	0	0	0	0	0	0	0	0	0	0	0	0	10.4115	0	0	0	0	0	0	0	0	0	0	0	0
A0A0N7KFC3	A0A0N7KFC3_ORYSJ	Os02g0504500 protein	Os02g0504500 OSNPB_020504500	Oryza sativa subsp. japonica (Rice)				MEREREK	1.0607	-0.00052908	0	0	0	0	0	0	0	0	0	0	0	0	0	0	0	14.1255	0	0	0	0	0	0	0	0	0	0	0
A0A0N7KFD4	A0A0N7KFD4_ORYSJ	Os02g0516901 protein	Os02g0516901 OSNPB_020516901	Oryza sativa subsp. japonica (Rice)				KVKGQLTGYR	0.97987	-6.8113	0	0	0	0	0	0	0	0	0	0	0	0	0	0	0	12.6077	0	0	0	0	0	0	0	0	0	0	0
A0A0N7KFM0	A0A0N7KFM0_ORYSJ	Os02g0599850 protein	Os02g0599850 OSNPB_020599850	Oryza sativa subsp. japonica (Rice)				GRDVVTGRLFPVCN	0.98708	-10.086	0	0	13.1346	11.9224	0	0	13.7259	0	0	0	0	0	0	0	0	0	0	0	0	0	12.4849	13.9966	0	0	0	12.417	0
A0A0N7KFQ2	A0A0N7KFQ2_ORYSJ	Os02g0624700 protein	Os02g0624700 OSNPB_020624700	Oryza sativa subsp. japonica (Rice)				GPEPYPRRRPPPPPHR	0.98555	-12.387	0	0	0	0	0	0	0	0	0	0	0	0	0	0	0	9.2833	0	0	0	0	0	0	0	0	0	0	0
A0A0N7KFU9	A0A0N7KFU9_ORYSJ	Os02g0670200 protein	Os02g0670200 OSNPB_020670200	Oryza sativa subsp. japonica (Rice)				RVASGRASPVRPRPR	0.98394	-10.701	0	0	0	0	0	0	0	0	0	0	0	0	0	0	0	0	0	0	0	0	0	0	0	16.0954	0	0	0
A0A0N7KFV4	A0A0N7KFV4_ORYSJ	Os02g0675550 protein	Os02g0675550 OSNPB_020675550	Oryza sativa subsp. japonica (Rice)				MKATKFFLR	0.97571	-2.4684	0	0	0	0	0	0	0	0	0	0	0	0	0	0	0	0	0	0	0	0	0	0	0	0	0	0	0
A0A0N7KFW7	A0A0N7KFW7_ORYSJ	Os02g0689600 protein	Os02g0689600 OSNPB_020689600	Oryza sativa subsp. japonica (Rice)				LPIRTPDGKIHIR	0.98536	-9.2834	0	0	0	0	0	0	0	0	0	0	0	0	0	0	0	0	0	0	0	8.69429	0	0	0	0	0	0	0
A0A0N7KFY1	A0A0N7KFY1_ORYSJ	Os02g0702500 protein	Os02g0702500 OSNPB_020702500	Oryza sativa subsp. japonica (Rice)	peptidyl-serine phosphorylation [GO:0018105]; peptidyl-threonine phosphorylation [GO:0018107]		ATP binding [GO:0005524]; protein serine/threonine kinase activity [GO:0004674]	AAAVGQYNRRR	0.97744	-21.969	0	0	0	0	0	0	0	0	0	0	0	0	0	0	0	0	0	0	0	0	0	0	0	0	0	0	0
A0A0N7KFY7	A0A0N7KFY7_ORYSJ	Os02g0707100 protein	Os02g0707100 OSNPB_020707100	Oryza sativa subsp. japonica (Rice)		membrane [GO:0016020]	flavin adenine dinucleotide binding [GO:0050660]; oxidoreductase activity [GO:0016491]	VINIAELEK	0.97162	-2.7229	0	0	0	0	0	0	0	0	0	0	0	0	0	0	0	0	0	0	0	0	0	0	0	9.7917	0	0	0
A0A0N7KG67	A0A0N7KG67_ORYSJ	Nuclear transcription factor Y subunit	Os02g0776400 OSNPB_020776400	Oryza sativa subsp. japonica (Rice)	regulation of transcription by RNA polymerase II [GO:0006357]	nucleus [GO:0005634]	DNA-binding transcription factor activity, RNA polymerase II-specific [GO:0000981]; RNA polymerase II cis-regulatory region sequence-specific DNA binding [GO:0000978]	HAMKRAR	1.0711	-0.00052908	0	0	0	0	0	0	0	0	0	0	0	0	0	0	0	0	0	0	0	0	0	0	0	0	0	0	0
A0A0N7KG77	A0A0N7KG77_ORYSJ	Os02g0783050 protein	Os02g0783050 OSNPB_020783050	Oryza sativa subsp. japonica (Rice)				VLVRLNAAIVHDR	0.98404	-10.985	0	0	0	0	0	0	0	0	0	0	0	0	0	0	0	0	0	0	0	0	0	0	0	0	0	0	0
A0A0N7KGB5	A0A0N7KGB5_ORYSJ	Os02g0814900 protein	Os02g0814900 OSNPB_020814900	Oryza sativa subsp. japonica (Rice)	biosynthetic process [GO:0009058]		catalytic activity [GO:0003824]	GFQRTLTVLSRIR	1.069	-0.00052908	11.6234	0	0	10.6782	0	0	0	11.1865	0	10.4334	10.3972	0	9.7006	0	0	0	0	0	0	0	0	0	12.0374	0	0	0	0
A0A0N7KGF1	A0A0N7KGF1_ORYSJ	Os03g0102850 protein	Os03g0102850 OSNPB_030102850	Oryza sativa subsp. japonica (Rice)		membrane [GO:0016020]		TTPPCWR	0.97304	-2.0335	0	0	0	0	0	0	0	0	0	0	0	0	0	0	0	0	0	0	0	0	0	0	0	0	0	0	11.6914
A0A0N7KGG7	A0A0N7KGG7_ORYSJ	Os03g0115350 protein	Os03g0115350 OSNPB_030115350	Oryza sativa subsp. japonica (Rice)				HDLPRVK	1.0659	-0.00052908	0	0	0	0	0	0	0	0	0	0	0	0	0	0	0	0	0	0	0	0	0	0	0	0	0	0	0
A0A0N7KGH1	A0A0N7KGH1_ORYSJ	Os03g0118700 protein	Os03g0118700 OSNPB_030118700	Oryza sativa subsp. japonica (Rice)			flavin adenine dinucleotide binding [GO:0050660]; oxidoreductase activity, acting on CH-OH group of donors [GO:0016614]	DVERCVR	0.97434	-30.472	12.1152	0	0	11.6835	0	0	0	0	0	0	0	0	0	0	0	10.0716	9.12309	0	0	0	0	10.4454	0	0	0	0	10.6747
A0A0N7KGI5	A0A0N7KGI5_ORYSJ	Os03g0129200 protein	Os03g0129200 OSNPB_030129200	Oryza sativa subsp. japonica (Rice)	rRNA catabolic process [GO:0016075]	cytoplasmic exosome (RNase complex) [GO:0000177]; exosome (RNase complex) [GO:0000178]; nuclear exosome (RNase complex) [GO:0000176]	3'-5'-exoribonuclease activity [GO:0000175]; endonuclease activity [GO:0004519]; RNA binding [GO:0003723]	FFVFTNEHHRDTYVK	0.98354	-10.701	0	8.68015	0	0	0	0	0	0	0	0	0	0	0	0	0	0	0	0	0	0	0	0	0	0	0	0	0
A0A0N7KGN8	A0A0N7KGN8_ORYSJ	Os03g0171600 protein	Os03g0171600 OSNPB_030171600	Oryza sativa subsp. japonica (Rice)				QNNKWITLGK	0.97969	-6.8113	0	0	0	0	0	0	0	0	0	0	0	0	0	0	0	0	0	0	0	0	0	0	0	0	0	0	0
A0A0N7KGP7	A0A0N7KGP7_ORYSJ	Os03g0179750 protein	Os03g0179750 OSNPB_030179750	Oryza sativa subsp. japonica (Rice)				FGLCALTV	0.97491	-3.735	0	0	0	0	0	0	0	0	0	0	0	0	0	0	0	0	0	0	0	0	0	0	0	0	0	0	0
A0A0N7KGQ5	A0A0N7KGQ5_ORYSJ	Os03g0185800 protein	Os03g0185800 OSNPB_030185800	Oryza sativa subsp. japonica (Rice)				HAAPPLACTSPNNGSNR	0.98119	-10.57	0	0	0	0	0	0	0	0	0	0	0	8.90899	0	0	0	0	0	0	0	0	0	0	0	0	0	0	0
A0A0N7KGS5	A0A0N7KGS5_ORYSJ	Os03g0202250 protein	Os03g0202250 OSNPB_030202250	Oryza sativa subsp. japonica (Rice)				LCGWKDIKHSQSSR	0.98683	-10.086	0	0	0	0	0	0	0	0	0	0	10.6435	0	0	0	0	0	0	0	0	0	0	0	0	0	0	0	0
A0A0N7KGT2	A0A0N7KGT2_ORYSJ	Os03g0208700 protein	Os03g0208700 OSNPB_030208700	Oryza sativa subsp. japonica (Rice)	cell cycle [GO:0007049]; cell division [GO:0051301]			QHLRFSRIDDI	0.97408	-3.1204	0	0	0	0	0	0	0	0	10.6738	0	0	0	0	0	0	0	0	0	0	0	12.3265	0	0	0	0	0	0
A0A0N7KGT8	A0A0N7KGT8_ORYSJ	Os03g0213150 protein	Os03g0213150 OSNPB_030213150	Oryza sativa subsp. japonica (Rice)		membrane [GO:0016020]		NARTQTITFLEK	0.97697	-3.4818	0	0	0	0	0	0	0	0	0	0	0	0	0	0	0	0	0	0	0	0	0	0	0	14.1304	0	12.2632	0
A0A0N7KGW2	A0A0N7KGW2_ORYSJ	Os03g0233600 protein	Os03g0233600 OSNPB_030233600	Oryza sativa subsp. japonica (Rice)				KCLAAGVEVDFKSK	0.98661	-12.119	9.40527	0	0	10.2155	0	0	0	0	0	0	0	0	0	0	0	0	0	0	0	0	0	0	0	0	0	0	0
A0A0N7KGY7	A0A0N7KGY7_ORYSJ	Os03g0256800 protein	Os03g0256800 OSNPB_030256800	Oryza sativa subsp. japonica (Rice)	signal transduction [GO:0007165]			LKAMIHPIENK	0.98456	-8.0623	0	0	0	0	10.2005	0	0	0	0	0	0	0	0	0	0	0	0	0	0	0	0	0	0	0	0	0	0
A0A0N7KH00	A0A0N7KH00_ORYSJ	Os03g0267850 protein	Os03g0267850 OSNPB_030267850	Oryza sativa subsp. japonica (Rice)				SEHKGTKTNR	0.97952	-6.8113	0	0	0	0	0	0	0	0	0	0	0	0	0	0	0	0	0	0	0	0	0	0	0	0	0	0	0
A0A0N7KH27	A0A0N7KH27_ORYSJ	Os03g0288300 protein	Os03g0288300 OSNPB_030288300	Oryza sativa subsp. japonica (Rice)				EDLSFFELIKSLFR	0.98612	-11.759	0	0	0	0	0	0	0	0	0	0	0	0	0	0	0	0	0	0	0	0	0	0	0	0	0	0	0
A0A0N7KH29	A0A0N7KH29_ORYSJ	Os03g0289850 protein	Os03g0289850 OSNPB_030289850	Oryza sativa subsp. japonica (Rice)				ALAADPAER	0.96901	-2.7229	0	0	0	0	0	0	9.87895	0	0	0	0	0	0	0	0	0	0	0	0	0	0	0	0	0	0	0	0
A0A0N7KH33	A0A0N7KH33_ORYSJ	Os03g0294100 protein	Os03g0294100 OSNPB_030294100	Oryza sativa subsp. japonica (Rice)	chloroplast organization [GO:0009658]	chloroplast outer membrane [GO:0009707]		AFQELKMYASKSD	0.98569	-9.2834	0	0	11.2288	0	0	0	0	0	0	0	0	0	0	0	0	0	0	0	0	0	0	0	0	0	0	0	0
A0A0N7KH70	A0A0N7KH70_ORYSJ	Os03g0326250 protein	Os03g0326250 OSNPB_030326250	Oryza sativa subsp. japonica (Rice)				FHRYFASR	0.97538	-1.7021	0	0	0	0	0	0	0	0	0	0	0	0	0	0	0	0	0	12.5629	0	0	0	0	0	0	0	0	0
A0A0N7KH75	A0A0N7KH75_ORYSJ	Os03g0331200 protein	Os03g0331200 OSNPB_030331200	Oryza sativa subsp. japonica (Rice)	protein desumoylation [GO:0016926]	nucleus [GO:0005634]	deSUMOylase activity [GO:0016929]	TFASPER	0.97596	-4.7564	0	0	0	0	0	0	0	9.47867	0	13.9262	0	14.3221	0	0	0	0	0	0	0	0	0	0	0	0	0	0	0
A0A0N7KH84	A0A0N7KH84_ORYSJ	Os03g0338700 protein	Os03g0338700 OSNPB_030338700	Oryza sativa subsp. japonica (Rice)				SLRGARPSSSARTPTSSR	0.98604	-11.894	0	0	0	0	0	0	0	0	0	0	0	0	0	0	0	0	0	0	0	0	0	0	0	0	0	10.1071	0
A0A0N7KH98	A0A0N7KH98_ORYSJ	Os03g0353366 protein	Os03g0353366 OSNPB_030353366	Oryza sativa subsp. japonica (Rice)				HHVLHVPRAR	0.98391	-8.7136	16.6745	0	0	0	16.1008	0	11.6886	0	0	0	0	0	0	0	0	0	0	0	0	0	0	0	0	0	0	0	0
A0A0N7KHA6	A0A0N7KHA6_ORYSJ	Os03g0360533 protein	Os03g0360533 OSNPB_030360533	Oryza sativa subsp. japonica (Rice)				ASFHHRAR	0.97605	-1.7021	0	0	0	0	0	0	0	0	0	0	0	0	0	0	0	0	0	0	0	0	0	0	0	0	0	0	0
A0A0N7KHB3	A0A0N7KHB3_ORYSJ	Os03g0367600 protein	Os03g0367600 OSNPB_030367600	Oryza sativa subsp. japonica (Rice)				GILPLTTR	0.97738	-3.735	0	0	0	0	0	0	0	0	0	0	0	0	0	0	0	0	0	0	0	0	0	0	0	0	0	0	0
A0A0N7KHC6	A0A0N7KHC6_ORYSJ	Os03g0379950 protein	Os03g0379950 OSNPB_030379950	Oryza sativa subsp. japonica (Rice)				RGEEELPAWER	0.98501	-8.0623	0	0	0	0	0	0	0	0	0	0	0	0	0	0	0	0	0	0	0	0	0	0	0	0	0	0	0
A0A0N7KHD4	A0A0N7KHD4_ORYSJ	Os03g0389175 protein	Os03g0389175 OSNPB_030389175	Oryza sativa subsp. japonica (Rice)				LGSIDSVAVGR	0.97534	-4.4521	0	0	0	0	0	0	0	0	0	0	0	0	0	0	0	0	0	0	0	0	0	0	0	0	0	0	0
A0A0N7KHD8	A0A0N7KHD8_ORYSJ	Os03g0393066 protein	Os03g0393066 OSNPB_030393066	Oryza sativa subsp. japonica (Rice)	proteolysis [GO:0006508]		serine-type carboxypeptidase activity [GO:0004185]	KHVQLHDWHR	0.97033	-5.1097	0	0	0	0	0	0	0	0	0	0	0	0	0	0	0	0	0	0	0	0	0	10.9888	0	0	0	0	0
A0A0N7KHF8	A0A0N7KHF8_ORYSJ	Os03g0415600 protein	Os03g0415600 OSNPB_030415600	Oryza sativa subsp. japonica (Rice)	protein import into mitochondrial matrix [GO:0030150]	mitochondrial inner membrane [GO:0005743]; TIM23 mitochondrial import inner membrane translocase complex [GO:0005744]		SPWAARTHRR	0.97925	-6.8113	0	0	0	0	0	0	0	0	0	0	0	0	0	0	0	0	0	0	0	0	0	11.453	0	0	0	0	0
A0A0N7KHG8	A0A0N7KHG8_ORYSJ	Putative diacylglycerol kinase (With alternative splicing)	OSJNBa0020H02.13	Oryza sativa subsp. japonica (Rice)	phosphorylation [GO:0016310]; signal transduction [GO:0007165]	membrane [GO:0016020]	ATP binding [GO:0005524]; diacylglycerol kinase activity [GO:0004143]; metal ion binding [GO:0046872]	KISLSWMKMIAR	0.97448	-3.4819	0	0	0	0	0	0	0	0	0	0	0	0	0	0	0	0	0	0	13.6485	0	0	0	0	0	0	0	0
A0A0N7KHG9	A0A0N7KHG9_ORYSJ	Os03g0426350 protein	Os03g0426350 OSNPB_030426350	Oryza sativa subsp. japonica (Rice)				EQRWQATPR	0.96835	-2.4684	0	0	0	0	0	0	0	0	0	0	0	0	0	0	0	0	0	0	0	0	0	0	0	0	0	0	0
A0A0N7KHH3	A0A0N7KHH3_ORYSJ	Os03g0431400 protein	Os03g0431400 OSNPB_030431400	Oryza sativa subsp. japonica (Rice)		membrane [GO:0016020]		AKTVCSVARR	0.9863	-12.25	11.41	0	0	0	0	0	0	0	0	0	0	0	0	0	0	0	0	0	10.8749	0	9.12668	0	0	0	0	0	0
A0A0N7KHJ6	A0A0N7KHJ6_ORYSJ	Os03g0572925 protein	Os03g0572925 OSNPB_030572925	Oryza sativa subsp. japonica (Rice)				QEAELDGR	0.97371	-3.2122	0	11.6328	0	11.1805	0	0	0	0	0	0	0	0	0	0	0	0	0	0	10.1833	0	0	0	0	10.3054	0	0	0
A0A0N7KHK1	A0A0N7KHK1_ORYSJ	Hexosyltransferase (EC 2.4.1.-)	Os03g0577500 OSNPB_030577500	Oryza sativa subsp. japonica (Rice)	protein glycosylation [GO:0006486]	Golgi membrane [GO:0000139]	hexosyltransferase activity [GO:0016758]	YFMVIGINTAFSSR	0.98681	-10.086	0	0	0	0	0	0	0	8.78852	0	0	0	0	0	0	0	0	0	0	0	0	0	0	0	0	0	0	0
A0A0N7KHM4	A0A0N7KHM4_ORYSJ	Os03g0605700 protein	Os03g0605700 OSNPB_030605700	Oryza sativa subsp. japonica (Rice)				ASPPGGR	0.9733	-0.00052908	0	0	0	0	0	0	0	0	0	0	0	0	0	0	0	0	0	0	0	13.0694	0	0	0	0	0	0	0
A0A0N7KHN7	A0A0N7KHN7_ORYSJ	Os03g0624000 protein	Os03g0624000 OSNPB_030624000	Oryza sativa subsp. japonica (Rice)	abaxial cell fate specification [GO:0010158]; regulation of DNA-templated transcription [GO:0006355]	nucleus [GO:0005634]	transcription cis-regulatory region binding [GO:0000976]	LHQPSQIQRFK	0.98032	-8.0623	0	0	11.041	0	0	0	0	0	10.1892	0	10.3404	0	0	0	0	0	0	0	0	10.8675	0	0	0	0	0	0	0
A0A0N7KHN8	A0A0N7KHN8_ORYSJ	Os03g0625201 protein	Os03g0625201 OSNPB_030625201	Oryza sativa subsp. japonica (Rice)				LPLYTTNRR	0.97441	-2.4684	0	0	0	0	0	0	0	0	0	0	0	0	0	0	0	0	0	0	0	0	0	0	0	0	0	0	0
A0A0N7KHS7	A0A0N7KHS7_ORYSJ	Os03g0667150 protein	Os03g0667150 OSNPB_030667150	Oryza sativa subsp. japonica (Rice)				SVDSSFRNLSRTSEQCGK	0.98581	-11.894	0	0	0	0	0	0	0	0	0	0	0	0	0	0	0	0	0	0	0	0	0	0	0	0	0	0	0
A0A0N7KHS8	A0A0N7KHS8_ORYSJ	Os03g0667850 protein	Os03g0667850 OSNPB_030667850	Oryza sativa subsp. japonica (Rice)				ALAAMGG	0.97016	-0.00052908	0	0	0	0	0	0	0	0	0	0	0	0	0	10.8101	0	0	0	0	0	0	0	0	8.86787	0	0	0	0
A0A0N7KHV3	A0A0N7KHV3_ORYSJ	Os03g0692850 protein	Os03g0692850 OSNPB_030692850	Oryza sativa subsp. japonica (Rice)				LRRRPPWER	0.98429	-12.564	0	0	0	0	0	16.6472	0	0	12.9971	0	0	0	0	0	0	0	0	0	0	17.4234	0	0	0	0	0	0	0
A0A0N7KHW0	A0A0N7KHW0_ORYSJ	Os03g0700301 protein	Os03g0700301 OSNPB_030700301	Oryza sativa subsp. japonica (Rice)				GPQNLGR	0.97627	-3.6711	0	0	0	0	0	0	0	0	0	0	0	0	0	0	0	0	0	0	9.80029	0	0	0	0	0	0	0	0
A0A0N7KHX5	A0A0N7KHX5_ORYSJ	Os03g0711650 protein	Os03g0711650 OSNPB_030711650	Oryza sativa subsp. japonica (Rice)				AVVVGGG	0.96785	-0.00052908	0	0	0	0	0	0	0	0	0	0	0	0	0	0	0	0	0	0	0	0	0	0	0	0	0	0	0
A0A0N7KHY1	A0A0N7KHY1_ORYSJ	Os03g0716400 protein	Os03g0716400 OSNPB_030716400	Oryza sativa subsp. japonica (Rice)		membrane [GO:0016020]		LVFVFNGR	0.98354	-13.821	0	0	14.5462	0	0	0	0	0	0	0	0	0	0	14.0049	10.9897	0	0	0	0	0	0	0	15.5153	0	0	0	0
A0A0N7KI20	A0A0N7KI20_ORYSJ	Os03g0749300 protein	Os03g0749300 OSNPB_030749300	Oryza sativa subsp. japonica (Rice)	carbohydrate metabolic process [GO:0005975]	extracellular region [GO:0005576]	hydrolase activity, hydrolyzing O-glycosyl compounds [GO:0004553]	IDDAVYR	0.96655	-2.0335	0	13.7191	0	0	0	0	0	0	0	0	0	0	0	0	0	0	0	0	0	0	0	0	0	0	0	0	0
A0A0N7KI28	A0A0N7KI28_ORYSJ	Os03g0756500 protein	Os03g0756500 OSNPB_030756500	Oryza sativa subsp. japonica (Rice)	histone modification [GO:0016570]; positive regulation of transcription elongation by RNA polymerase II [GO:0032968]; transcription elongation by RNA polymerase II promoter [GO:0006368]	Cdc73/Paf1 complex [GO:0016593]; nucleus [GO:0005634]	RNA polymerase II C-terminal domain phosphoserine binding [GO:1990269]	NGKAIIQSQGR	0.97082	-3.1203	0	0	0	0	0	0	0	0	0	0	0	0	0	0	0	0	0	0	0	0	0	0	0	0	0	0	0
A0A0N7KI53	A0A0N7KI53_ORYSJ	Os03g0778700 protein	Os03g0778700 OSNPB_030778700	Oryza sativa subsp. japonica (Rice)				VSVPCLSLEQR	0.97386	-3.1204	0	0	0	0	0	0	0	9.99859	0	0	0	0	0	0	0	0	0	0	0	0	0	0	0	0	0	0	0
A0A0N7KID0	A0A0N7KID0_ORYSJ	Os03g0837850 protein	Os03g0837850 OSNPB_030837850	Oryza sativa subsp. japonica (Rice)				SPSTMEK	0.96063	-2.0335	0	0	0	0	0	0	0	0	0	0	0	0	0	0	0	0	0	0	0	0	0	0	0	9.10748	0	0	0
A0A0N7KID4	A0A0N7KID4_ORYSJ	Os03g0842400 protein	Os03g0842400 OSNPB_030842400	Oryza sativa subsp. japonica (Rice)				LYIYILVAWK	0.97086	-5.1097	0	0	0	0	0	0	0	0	10.8248	0	0	0	0	0	0	0	0	0	0	0	0	0	12.5733	0	11.0132	0	0
A0A0N7KID9	A0A0N7KID9_ORYSJ	Os03g0846200 protein	Os03g0846200 OSNPB_030846200	Oryza sativa subsp. japonica (Rice)				AEPVQSQIPRSISR	0.97808	-18.181	0	13.7419	9.50279	0	0	0	0	0	0	0	0	0	0	0	0	10.0661	0	9.75154	10.8398	0	10.6766	9.49584	0	9.19328	0	0	0
A0A0N7KIH1	A0A0N7KIH1_ORYSJ	Os04g0115500 protein	Os04g0115500 OsJ_13566 OSNPB_040115500	Oryza sativa subsp. japonica (Rice)				DTTPLTRSSR	0.97203	-3.2084	0	0	0	12.9617	0	0	0	0	0	0	0	0	0	0	0	0	0	0	0	0	0	0	0	0	0	0	0
A0A0N7KIJ1	A0A0N7KIJ1_ORYSJ	Os04g0140533 protein	Os04g0140533 OSNPB_040140533	Oryza sativa subsp. japonica (Rice)				CQRWIYPDR	0.97055	-2.4684	0	0	0	0	0	0	0	0	0	9.09032	0	0	0	0	0	0	0	0	0	0	0	0	0	0	0	0	0
A0A0N7KIJ9	A0A0N7KIJ9_ORYSJ	Os04g0155200 protein	Os04g0155200 OSNPB_040155200	Oryza sativa subsp. japonica (Rice)				TKLEEIKTNK	0.9789	-6.8113	0	0	0	0	0	0	0	0	9.16985	0	0	0	0	0	0	0	0	0	0	0	0	0	0	0	0	0	0
A0A0N7KIK8	A0A0N7KIK8_ORYSJ	Os04g0169100 protein	Os04g0169100 OSNPB_040169100	Oryza sativa subsp. japonica (Rice)		membrane [GO:0016020]		FEIRIRESR	0.97071	-2.4684	0	0	0	0	0	0	0	0	0	0	0	0	0	0	0	0	0	0	0	0	0	0	0	0	0	0	0
A0A0N7KIP0	A0A0N7KIP0_ORYSJ	Os04g0218350 protein	Os04g0218350 OSNPB_040218350	Oryza sativa subsp. japonica (Rice)				EHRRSRPR	0.98529	-12.388	0	0	0	0	0	0	0	0	0	0	0	0	0	0	0	0	0	0	0	0	0	0	0	0	0	0	0
A0A0N7KIP6	A0A0N7KIP6_ORYSJ	Os04g0225550 protein	Os04g0225550 OSNPB_040225550	Oryza sativa subsp. japonica (Rice)			metal ion binding [GO:0046872]; oxidoreductase activity, acting on single donors with incorporation of molecular oxygen, incorporation of two atoms of oxygen [GO:0016702]	TASIAAEWCLR	0.9777	-21.6	0	0	0	0	10.9866	0	0	0	0	0	0	0	0	0	0	0	0	0	0	0	0	0	0	0	0	0	10.5691
A0A0N7KIQ5	A0A0N7KIQ5_ORYSJ	Os04g0252850 protein	Os04g0252850 OSNPB_040252850	Oryza sativa subsp. japonica (Rice)		membrane [GO:0016020]		DRLLDHLEIR	0.97898	-6.8113	0	0	0	0	0	0	0	0	0	0	0	0	0	0	0	0	0	0	0	0	0	0	0	0	0	0	10.4571
A0A0N7KIQ6	A0A0N7KIQ6_ORYSJ	Os04g0255525 protein	Os04g0255525 OSNPB_040255525	Oryza sativa subsp. japonica (Rice)				GPPANFVDGHRPR	0.98493	-9.2834	0	0	0	0	0	0	0	0	0	0	0	0	0	0	0	0	0	0	0	0	0	0	0	0	0	0	0
A0A0N7KIR0	A0A0N7KIR0_ORYSJ	Os04g0269100 protein	Os04g0269100 OSNPB_040269100	Oryza sativa subsp. japonica (Rice)			oxidoreductase activity [GO:0016491]	KGAWQAVAGLAGLR	0.98591	-11.787	0	0	0	0	0	0	0	0	0	0	0	0	15.6782	0	0	0	0	0	0	0	0	0	0	0	0	0	0
A0A0N7KIS8	A0A0N7KIS8_ORYSJ	Os04g0298550 protein	Os04g0298550 OSNPB_040298550	Oryza sativa subsp. japonica (Rice)				LLRSRESNG	0.97025	-2.4684	0	0	0	0	0	0	0	0	0	0	0	0	0	0	0	0	0	0	0	0	0	13.4584	0	0	0	0	0
A0A0N7KIV4	A0A0N7KIV4_ORYSJ	Os04g0341500 protein	Os04g0341500 OSNPB_040341500	Oryza sativa subsp. japonica (Rice)			magnesium ion binding [GO:0000287]; terpene synthase activity [GO:0010333]	HLKQSIILIFRWWK	0.97864	-0.0026929	0	0	0	0	0	0	0	0	0	0	0	0	0	0	0	0	0	0	0	0	0	0	0	0	0	10.4394	0
A0A0N7KIV9	A0A0N7KIV9_ORYSJ	Os04g0348200 protein	Os04g0348200 OSNPB_040348200	Oryza sativa subsp. japonica (Rice)				PYAAPPK	0.97546	-3.6711	0	0	0	0	0	0	0	0	0	0	0	0	0	0	0	0	0	0	0	0	0	0	0	0	0	0	0
A0A0N7KIW8	A0A0N7KIW8_ORYSJ	Os04g0363200 protein	Os04g0363200 OSNPB_040363200	Oryza sativa subsp. japonica (Rice)				AVEAGGGGGARWK	0.98428	-10.985	0	0	0	0	0	0	0	0	0	0	0	0	0	0	0	0	0	0	0	0	0	0	0	0	0	0	15.2953
A0A0N7KIY0	A0A0N7KIY0_ORYSJ	Os04g0379300 protein	Os04g0379300 OSNPB_040379300	Oryza sativa subsp. japonica (Rice)				LIFKRNSGLVQSEALLVK	0.98015	-1.0381	0	0	0	0	0	0	0	0	0	0	0	0	0	0	9.19749	0	0	0	0	0	0	0	0	0	0	0	0
A0A0N7KIY6	A0A0N7KIY6_ORYSJ	Os04g0385100 protein	Os04g0385100 OSNPB_040385100	Oryza sativa subsp. japonica (Rice)				CDYVMRPARRQR	0.97351	-3.4819	0	0	0	0	0	0	0	0	0	0	0	0	0	0	0	0	0	0	0	0	0	0	0	0	0	0	0
A0A0N7KIZ6	A0A0N7KIZ6_ORYSJ	Os04g0395651 protein	Os04g0395651 OSNPB_040395651	Oryza sativa subsp. japonica (Rice)				RCNPLHSR	0.98352	-1.7021	0	0	0	0	0	0	0	0	0	0	0	0	0	0	0	0	0	0	0	0	0	0	0	0	0	0	0
A0A0N7KJ04	A0A0N7KJ04_ORYSJ	Os04g0404100 protein	Os04g0404100 OSNPB_040404100	Oryza sativa subsp. japonica (Rice)				VASSSHRR	0.98351	-1.7021	0	0	0	0	0	0	0	0	0	0	0	0	0	0	0	0	0	0	0	0	0	0	0	0	0	0	0
A0A0N7KJ18	A0A0N7KJ18_ORYSJ	Os04g0419200 protein	Os04g0419200 OSNPB_040419200	Oryza sativa subsp. japonica (Rice)				LPWPASLR	0.97759	-3.735	0	0	0	11.1166	0	0	0	0	0	0	0	0	0	0	0	0	0	0	0	0	0	11.3475	0	0	0	0	0
A0A0N7KJ21	A0A0N7KJ21_ORYSJ	Os04g0422000 protein	Os04g0422000 OSNPB_040422000	Oryza sativa subsp. japonica (Rice)				LVYSTISILGK	0.97376	-2.5454	13.0955	0	0	0	0	0	0	0	0	0	0	0	0	0	0	0	0	0	0	0	0	0	0	0	0	0	0
A0A0N7KJ32	A0A0N7KJ32_ORYSJ	Os04g0433900 protein	Os04g0433900 OSNPB_040433900	Oryza sativa subsp. japonica (Rice)	regulation of transcription by RNA polymerase II [GO:0006357]	nucleus [GO:0005634]	acyltransferase activity, transferring groups other than amino-acyl groups [GO:0016747]; metal ion binding [GO:0046872]	LFSLPRAWK	0.97569	-39.297	0	9.78614	0	0	0	0	0	0	0	0	0	0	0	0	11.0179	10.7998	0	0	0	9.70276	0	0	0	0	0	9.02929	0
A0A0N7KJ52	A0A0N7KJ52_ORYSJ	Os04g0450100 protein	Os04g0450100 OSNPB_040450100	Oryza sativa subsp. japonica (Rice)				HPKGHTVPRLDEK	0.98435	-10.985	0	0	0	0	0	0	0	0	0	0	0	0	0	0	0	0	0	0	0	0	9.24895	0	0	0	0	0	0
A0A0N7KJ60	A0A0N7KJ60_ORYSJ	Os04g0457300 protein	Os04g0457300 OSNPB_040457300	Oryza sativa subsp. japonica (Rice)		membrane [GO:0016020]	transmembrane transporter activity [GO:0022857]	VGGAAGR	0.94906	-0.00052908	16.449	0	0	15.6776	0	0	0	15.9144	8.72226	15.9211	16.0941	0	15.6107	15.8291	0	0	0	11.951	0	0	16.7031	0	16.9804	17.0627	11.4025	11.4107	16.3681
A0A0N7KJ76	A0A0N7KJ76_ORYSJ	Os04g0470801 protein	Os04g0470801 OSNPB_040470801	Oryza sativa subsp. japonica (Rice)				QQRQLHRVEVVHEPAR	0.98154	-10.686	0	0	0	0	0	0	0	0	0	0	0	0	0	0	0	0	0	0	0	0	0	0	0	0	0	0	0
A0A0N7KJ80	A0A0N7KJ80_ORYSJ	Os04g0474700 protein	Os04g0474700 OSNPB_040474700	Oryza sativa subsp. japonica (Rice)	carbohydrate metabolic process [GO:0005975]		beta-D-fucosidase activity [GO:0033907]; beta-galactosidase activity [GO:0004565]; beta-glucosidase activity [GO:0008422]	NCRQRFVISVWTR	0.98474	-9.2834	0	0	0	0	0	0	0	0	0	0	0	11.4142	0	0	0	0	0	0	0	0	0	0	0	0	0	0	0
A0A0N7KJ88	A0A0N7KJ88_ORYSJ	Os04g0480802 protein	Os04g0480802 OSNPB_040480802	Oryza sativa subsp. japonica (Rice)				RRWSLGAGGRPPPVR	0.97553	-23.719	0	0	0	0	0	0	0	0	0	0	0	0	0	12.4356	0	0	0	0	0	0	0	0	16.0778	0	0	0	13.8826
A0A0N7KJB0	A0A0N7KJB0_ORYSJ	Os04g0498725 protein	Os04g0498725 OSNPB_040498725	Oryza sativa subsp. japonica (Rice)				ARPDQPPGVVR	0.98478	-10.095	0	0	0	0	0	0	0	0	0	0	0	0	0	0	0	0	0	0	0	0	0	0	0	0	0	0	0
A0A0N7KJB8	A0A0N7KJB8_ORYSJ	Os04g0505500 protein	Os04g0505500 OSNPB_040505500	Oryza sativa subsp. japonica (Rice)				RDLVPSWMR	0.96997	-1.3909	0	0	0	0	0	0	0	0	0	0	0	0	0	0	0	0	0	0	0	0	0	0	0	0	0	0	0
A0A0N7KJC4	A0A0N7KJC4_ORYSJ	Os04g0509500 protein	Os04g0509500 OSNPB_040509500	Oryza sativa subsp. japonica (Rice)				RHRPQQRR	0.98138	-1.7021	0	16.6102	16.1078	15.4888	0	15.4565	16.148	0	0	15.6174	0	14.5236	0	0	0	11.7647	17.1042	17.1159	0	17.1372	16.8234	16.9105	17.0198	0	16.4845	16.4648	0
A0A0N7KJF0	A0A0N7KJF0_ORYSJ	Os04g0533300 protein	Os04g0533300 OSNPB_040533300	Oryza sativa subsp. japonica (Rice)				SVRPPAR	0.94031	-0.00052908	0	0	0	0	0	0	0	0	0	0	0	0	0	0	0	9.84309	0	0	0	0	0	0	0	0	0	0	0
A0A0N7KJH2	A0A0N7KJH2_ORYSJ	Trehalose 6-phosphate phosphatase (EC 3.1.3.12)	Os04g0554000 OSNPB_040554000	Oryza sativa subsp. japonica (Rice)	trehalose biosynthetic process [GO:0005992]		trehalose-phosphatase activity [GO:0004805]	NVDKKNWK	0.97155	-1.8167	0	0	0	0	0	0	0	0	0	0	0	0	0	0	0	12.2727	0	0	0	0	0	0	0	0	0	0	0
A0A0N7KJH9	A0A0N7KJH9_ORYSJ	Os04g0560100 protein	Os04g0560100 OSNPB_040560100	Oryza sativa subsp. japonica (Rice)				RAQDRPR	0.97884	-0.00052908	0	0	0	0	9.29632	0	0	0	0	0	0	0	0	0	0	0	0	0	0	0	0	0	0	0	0	0	0
A0A0N7KJI3	A0A0N7KJI3_ORYSJ	Os04g0563401 protein	Os04g0563401 OSNPB_040563401	Oryza sativa subsp. japonica (Rice)				VSPKSKSTMP	0.97939	-6.8113	0	0	0	0	0	0	0	0	0	0	0	0	0	0	0	0	0	0	0	0	0	0	0	0	10.5572	0	0
A0A0N7KJI4	A0A0N7KJI4_ORYSJ	Os04g0563950 protein	Os04g0563950 OSNPB_040563950	Oryza sativa subsp. japonica (Rice)				VLPLQARVHQPR	0.98868	-7.7702	0	0	0	0	11.8287	0	0	0	0	0	0	0	0	0	0	0	0	0	0	0	0	0	0	0	0	9.62209	0
A0A0N7KJI5	A0A0N7KJI5_ORYSJ	Os04g0564700 protein	Os04g0564700 OSNPB_040564700	Oryza sativa subsp. japonica (Rice)	pollen sperm cell differentiation [GO:0048235]; regulation of exocytosis [GO:0017157]	cytoplasm [GO:0005737]; plasma membrane [GO:0005886]	GTPase activator activity [GO:0005096]; myosin II binding [GO:0045159]; syntaxin binding [GO:0019905]	GFQSLREKLKPR	0.975	-35.76	0	0	0	0	0	0	8.13026	0	0	0	0	0	9.12358	0	0	0	0	0	0	12.3916	0	0	0	0	0	0	0
A0A0N7KJJ8	A0A0N7KJJ8_ORYSJ	Os04g0577337 protein	Os04g0577337 OSNPB_040577337	Oryza sativa subsp. japonica (Rice)				ERPPHQQRGTAEADR	0.97741	-21.682	0	0	0	0	0	0	0	0	0	0	0	0	0	0	0	0	0	0	0	0	0	0	0	9.63856	0	0	0
A0A0N7KJK7	A0A0N7KJK7_ORYSJ	Os04g0584800 protein	Os04g0584800 OSNPB_040584800	Oryza sativa subsp. japonica (Rice)				LVPQSHK	0.98053	-6.3935	0	0	0	0	0	0	0	0	0	0	0	0	0	0	0	0	0	0	0	0	0	0	0	0	0	0	0
A0A0N7KJM1	A0A0N7KJM1_ORYSJ	Os04g0597534 protein	Os04g0597534 OSNPB_040597534	Oryza sativa subsp. japonica (Rice)				HLEGRQRR	0.98324	-14.617	0	0	0	0	0	0	0	0	0	0	0	0	0	0	0	0	0	0	0	0	0	0	0	0	0	0	0
A0A0N7KJN6	A0A0N7KJN6_ORYSJ	Os04g0608400 protein	Os04g0608400 OSNPB_040608400	Oryza sativa subsp. japonica (Rice)	mRNA export from nucleus [GO:0006406]; protein import into nucleus [GO:0006606]; ribosomal large subunit export from nucleus [GO:0000055]; ribosomal small subunit export from nucleus [GO:0000056]	nuclear pore [GO:0005643]	structural constituent of nuclear pore [GO:0017056]	AFKVYDLLEKR	0.98224	-15.832	0	0	0	0	0	0	0	0	0	0	0	0	0	0	0	0	0	0	0	0	0	0	0	0	0	0	0
A0A0N7KJT1	A0A0N7KJT1_ORYSJ	Glutamyl-tRNA(Gln) amidotransferase subunit A, chloroplastic/mitochondrial (Glu-AdT subunit A) (EC 6.3.5.7)	GATA Os04g0643200 OSNPB_040643200	Oryza sativa subsp. japonica (Rice)	glutaminyl-tRNAGln biosynthesis via transamidation [GO:0070681]; mitochondrial translation [GO:0032543]	chloroplast stroma [GO:0009570]; glutamyl-tRNA(Gln) amidotransferase complex [GO:0030956]; mitochondrion [GO:0005739]	ATP binding [GO:0005524]; glutaminyl-tRNA synthase (glutamine-hydrolyzing) activity [GO:0050567]; hydrolase activity, acting on carbon-nitrogen (but not peptide) bonds, in linear amides [GO:0016811]	CFTAVSSLPSAPAK	0.9732	-2.3012	0	0	0	0	0	0	0	0	0	0	0	0	0	0	0	0	0	0	0	0	0	0	0	0	11.2953	0	0
A0A0N7KJT3	A0A0N7KJT3_ORYSJ	Os04g0644466 protein	Os04g0644466 OSNPB_040644466	Oryza sativa subsp. japonica (Rice)				RDLGGLHCNQR	0.97825	-6.3608	0	0	0	0	0	0	0	0	0	0	0	0	0	0	0	0	0	0	0	0	0	0	0	0	0	0	0
A0A0N7KJU3	A0A0N7KJU3_ORYSJ	Os04g0652450 protein	Os04g0652450 OSNPB_040652450	Oryza sativa subsp. japonica (Rice)				MPREHKLKPR	0.98243	-15.529	0	0	0	0	9.93655	0	0	0	0	0	0	0	0	0	0	0	0	9.26831	0	0	0	0	0	0	0	0	0
A0A0N7KJW2	A0A0N7KJW2_ORYSJ	Os04g0667900 protein	Os04g0667900 OSNPB_040667900	Oryza sativa subsp. japonica (Rice)	regulation of DNA repair [GO:0006282]	cytoplasm [GO:0005737]		GFNWAVTNAIVR	0.95322	-1.6736	0	0	0	0	0	12.7899	0	0	0	0	0	0	0	0	13.7943	0	0	0	0	0	0	0	0	0	0	0	0
A0A0N7KJZ4	A0A0N7KJZ4_ORYSJ	Os04g0691500 protein	Os04g0691500 OSNPB_040691500	Oryza sativa subsp. japonica (Rice)	protein import into nucleus [GO:0006606]	cytoplasm [GO:0005737]; nucleus [GO:0005634]	small GTPase binding [GO:0031267]	LIHIDVSFLF	0.97633	-4.6548	0	0	0	0	0	0	0	0	0	0	0	0	0	0	0	0	0	0	0	0	0	0	0	0	0	0	0
A0A0N7KK01	A0A0N7KK01_ORYSJ	Os05g0102800 protein	Os05g0102800 OSNPB_050102800	Oryza sativa subsp. japonica (Rice)			RNA binding [GO:0003723]	ALHSKPLGLMK	0.98421	-10.095	0	0	0	0	0	0	0	0	0	0	0	0	0	0	0	0	0	0	0	0	0	0	0	0	0	0	0
A0A0N7KK07	A0A0N7KK07_ORYSJ	Os05g0107801 protein	Os05g0107801 OSNPB_050107801	Oryza sativa subsp. japonica (Rice)				LSSWWFKTVK	0.97881	-6.8113	0	0	0	0	0	0	0	0	0	9.60716	0	0	0	0	0	0	0	0	0	0	0	0	0	0	0	0	0
A0A0N7KK31	A0A0N7KK31_ORYSJ	Os05g0127300 protein	Os05g0127300 OSNPB_050127300	Oryza sativa subsp. japonica (Rice)		membrane [GO:0016020]		EARHLQGGR	0.97641	-2.4684	0	0	0	0	0	0	0	0	0	0	0	0	0	0	0	0	0	0	0	0	0	0	0	0	0	0	0
A0A0N7KK49	A0A0N7KK49_ORYSJ	Os05g0143800 protein	Os05g0143800 OSNPB_050143800	Oryza sativa subsp. japonica (Rice)				LLQSKWR	0.98413	-13.397	0	0	0	0	0	0	0	0	0	0	0	0	0	0	0	0	0	0	0	0	0	0	0	0	0	0	0
A0A0N7KK60	A0A0N7KK60_ORYSJ	Os05g0151100 protein	Os05g0151100 OSNPB_050151100	Oryza sativa subsp. japonica (Rice)				HGAHPVPPQR	0.97704	-6.8118	0	0	15.8018	0	0	0	0	0	0	0	0	0	0	0	0	0	0	0	0	0	0	0	0	10.3036	0	0	0
A0A0N7KK61	A0A0N7KK61_ORYSJ	Os05g0151700 protein	Os05g0151700 OSNPB_050151700	Oryza sativa subsp. japonica (Rice)				FERSGCR	0.98049	-0.00052908	0	0	0	0	0	0	0	0	0	0	0	0	0	0	0	0	0	0	0	0	0	0	0	0	0	0	11.8041
A0A0N7KK75	A0A0N7KK75_ORYSJ	Os05g0164350 protein	Os05g0164350 OSNPB_050164350	Oryza sativa subsp. japonica (Rice)				CLPGGWR	0.96133	-2.0335	0	0	0	0	0	0	0	12.676	0	0	0	0	0	0	0	0	0	0	0	0	0	13.5961	0	0	0	0	0
A0A0N7KK78	A0A0N7KK78_ORYSJ	Transmembrane 9 superfamily member	Os05g0168500 OSNPB_050168500	Oryza sativa subsp. japonica (Rice)		endosome membrane [GO:0010008]; Golgi membrane [GO:0000139]		AASIEYPVR	0.97299	-4.5036	13.7208	0	0	0	0	0	0	0	0	0	0	0	0	0	12.6405	0	0	0	0	0	0	0	0	0	0	0	0
A0A0N7KK97	A0A0N7KK97_ORYSJ	Os05g0187000 protein	Os05g0187000 OSNPB_050187000	Oryza sativa subsp. japonica (Rice)	proteolysis involved in protein catabolic process [GO:0051603]	proteasome core complex [GO:0005839]		GKTEYLR	0.98139	-0.00052908	0	0	0	0	0	0	0	0	0	0	0	0	0	0	0	0	0	0	0	0	0	0	0	0	0	0	0
A0A0N7KKA5	A0A0N7KKA5_ORYSJ	Os05g0196100 protein	Os05g0196100 OSNPB_050196100	Oryza sativa subsp. japonica (Rice)		membrane [GO:0016020]	ABC-type transporter activity [GO:0140359]; ATP binding [GO:0005524]; ATP hydrolysis activity [GO:0016887]	QLRLSGEAR	0.9775	-21.676	13.4571	0	0	0	0	0	0	0	0	0	0	0	0	0	0	0	0	0	0	0	0	0	0	0	0	0	0
A0A0N7KKD1	A0A0N7KKD1_ORYSJ	Os05g0223701 protein	Os05g0223701 OSNPB_050223701	Oryza sativa subsp. japonica (Rice)				RTLGKTSTADGLR	0.98483	-9.2834	0	0	0	0	12.2029	0	0	0	0	0	0	0	0	0	0	0	0	0	0	0	0	0	0	0	0	0	0
A0A0N7KKE5	A0A0N7KKE5_ORYSJ	Os05g0244900 protein	Os05g0244900 OSNPB_050244900	Oryza sativa subsp. japonica (Rice)		nucleus [GO:0005634]		IVGMLRGAEDDR	0.98044	-7.7702	0	0	0	0	0	0	0	0	0	0	0	0	0	0	0	0	0	0	0	0	0	0	0	0	0	0	0
A0A0N7KKF1	A0A0N7KKF1_ORYSJ	Os05g0253400 protein	Os05g0253400 OSNPB_050253400	Oryza sativa subsp. japonica (Rice)				GAPAAAR	0.97727	-0.00052908	11.8548	11.9126	11.9771	12.1255	10.9866	12.162	0	12.12	12.1106	0	11.9569	11.9421	0	0	0	12.3353	12.2704	0	0	0	0	13.4267	19.4597	0	11.9439	0	11.87
A0A0N7KKG5	A0A0N7KKG5_ORYSJ	Os05g0287400 protein	Os05g0287400 OSNPB_050287400	Oryza sativa subsp. japonica (Rice)				YKSASDVPSR	0.97968	-6.8113	0	0	0	0	0	0	0	0	0	0	0	8.90361	0	0	0	0	0	0	0	0	0	0	0	0	0	0	0
A0A0N7KKH1	A0A0N7KKH1_ORYSJ	Os05g0297150 protein	Os05g0297150 OSNPB_050297150	Oryza sativa subsp. japonica (Rice)				GVIPMQRRHR	0.9796	-6.8113	0	0	0	0	0	0	0	0	0	0	0	0	0	0	0	0	0	0	0	10.8802	0	11.3458	0	0	0	0	0
A0A0N7KKH2	A0A0N7KKH2_ORYSJ	Os05g0298200 protein	Os05g0298200 OSNPB_050298200	Oryza sativa subsp. japonica (Rice)				TPGFRRLDR	0.97678	-2.4684	0	0	0	0	0	0	0	0	0	0	0	0	0	0	0	0	0	0	0	0	0	0	0	0	0	0	0
A0A0N7KKH8	A0A0N7KKH8_ORYSJ	Os05g0304701 protein	Os05g0304701 OSNPB_050304701	Oryza sativa subsp. japonica (Rice)				LGVPGRHPP	0.98032	-17.115	0	0	0	0	0	0	0	0	0	0	0	0	0	0	0	0	0	0	0	0	0	0	0	0	0	0	0
A0A0N7KKI4	A0A0N7KKI4_ORYSJ	Os05g0313199 protein	Os05g0313199 OSNPB_050313199	Oryza sativa subsp. japonica (Rice)				LPIPDANDEHVGLR	0.98761	-10.086	0	0	0	0	0	0	0	0	0	0	0	0	0	0	0	0	0	0	0	0	0	0	0	0	0	0	0
A0A0N7KKJ6	A0A0N7KKJ6_ORYSJ	Os05g0326900 protein	Os05g0326900 OSNPB_050326900	Oryza sativa subsp. japonica (Rice)				SLAEWWLTERRR	0.97518	-3.4819	0	0	0	0	0	0	0	0	0	0	0	0	0	0	0	0	0	0	0	0	0	0	0	0	0	0	0
A0A0N7KKL0	A0A0N7KKL0_ORYSJ	Os05g0348366 protein	Os05g0348366 OSNPB_050348366	Oryza sativa subsp. japonica (Rice)				RAGSCGR	0.98189	-0.00052908	10.2888	10.9089	0	0	10.6738	0	0	0	0	0	0	11.3695	0	0	0	0	0	0	0	13.7016	0	0	0	0	13.7401	0	0
A0A0N7KKL9	A0A0N7KKL9_ORYSJ	Os05g0357850 protein	Os05g0357850 OSNPB_050357850	Oryza sativa subsp. japonica (Rice)				WQWFSRK	0.98028	-0.00052908	0	0	0	0	0	0	0	0	0	0	0	0	0	0	0	0	0	0	0	0	0	10.8984	0	0	0	0	0
A0A0N7KKM9	A0A0N7KKM9_ORYSJ	Os05g0368666 protein	Os05g0368666 OSNPB_050368666	Oryza sativa subsp. japonica (Rice)				GVSHDLGAVAGGHLR	0.97612	-43.945	10.1273	0	0	0	0	0	0	10.3635	0	0	0	0	0	0	0	0	0	0	0	0	0	0	0	0	0	12.139	12.5484
A0A0N7KKN1	A0A0N7KKN1_ORYSJ	Os05g0370600 protein	Os05g0370600 OSNPB_050370600	Oryza sativa subsp. japonica (Rice)		membrane [GO:0016020]		FSSRIHLR	0.97929	-17.597	0	0	0	0	0	0	0	0	0	0	0	0	0	0	0	0	0	0	0	0	0	0	9.60079	0	9.52346	0	0
A0A0N7KKQ2	A0A0N7KKQ2_ORYSJ	Os05g0391100 protein	Os05g0391100 OSNPB_050391100	Oryza sativa subsp. japonica (Rice)				YPIGPSGLTLVRCPR	0.97544	-1.2684	0	0	0	0	0	0	0	0	0	0	0	0	0	0	0	0	0	13.0504	0	0	0	0	0	0	0	0	0
A0A0N7KKQ8	A0A0N7KKQ8_ORYSJ	Os05g0398000 protein	Os05g0398000 OSNPB_050398000	Oryza sativa subsp. japonica (Rice)	regulation of cyclin-dependent protein serine/threonine kinase activity [GO:0000079]		protein kinase binding [GO:0019901]	APDLSIKLYAER	0.98462	-11.174	0	0	0	0	0	0	0	0	0	0	0	0	0	0	0	0	0	0	13.7531	0	0	0	0	11.9093	0	0	0
A0A0N7KKW9	A0A0N7KKW9_ORYSJ	Laccase (EC 1.10.3.2) (Benzenediol:oxygen oxidoreductase) (Diphenol oxidase) (Urishiol oxidase)	Os05g0458300 OSNPB_050458300	Oryza sativa subsp. japonica (Rice)	lignin catabolic process [GO:0046274]	apoplast [GO:0048046]	copper ion binding [GO:0005507]; hydroquinone:oxygen oxidoreductase activity [GO:0052716]	LRVRPGKTYLLR	0.98311	-10.957	0	0	0	0	0	0	11.9525	0	0	0	0	0	0	0	0	0	0	0	0	0	0	0	0	0	0	0	0
A0A0N7KKX8	A0A0N7KKX8_ORYSJ	Os05g0467150 protein	Os05g0467150 OSNPB_050467150	Oryza sativa subsp. japonica (Rice)				LAREELPR	0.97094	-1.8804	0	0	0	0	0	0	0	0	0	0	0	0	0	0	0	0	0	0	0	0	0	0	0	0	0	0	0
A0A0N7KKY2	A0A0N7KKY2_ORYSJ	Os05g0470900 protein	Os05g0470900 OSNPB_050470900	Oryza sativa subsp. japonica (Rice)				HEAAAAAAAQGERRAR	0.98523	-12.387	0	0	0	0	0	0	0	0	0	0	0	0	0	0	0	12.034	0	0	0	0	0	11.4115	0	10.0077	10.2688	0	0
A0A0N7KKZ0	A0A0N7KKZ0_ORYSJ	Os05g0478300 protein	Os05g0478300 OSNPB_050478300	Oryza sativa subsp. japonica (Rice)	protein phosphorylation [GO:0006468]	plasma membrane [GO:0005886]	ATP binding [GO:0005524]; protein kinase activity [GO:0004672]	HHNVVTLR	0.975	-23.945	0	0	0	0	0	0	0	0	0	0	0	0	0	0	0	0	0	0	10.9819	0	0	0	0	0	0	0	0
A0A0N7KKZ2	A0A0N7KKZ2_ORYSJ	Os05g0480300 protein	Os05g0480300 OSNPB_050480300	Oryza sativa subsp. japonica (Rice)				AGLRGAAS	0.98342	-1.7021	0	0	0	0	0	0	0	0	0	0	0	0	0	0	0	0	0	0	0	0	0	0	0	0	0	0	0
A0A0N7KL15	A0A0N7KL15_ORYSJ	Os05g0500101 protein	Os05g0500101 OSNPB_050500101	Oryza sativa subsp. japonica (Rice)				HGAVPLDG	0.97371	-3.2122	0	0	0	0	0	0	0	0	0	0	0	0	0	0	0	0	0	0	0	0	0	0	0	9.77248	0	0	0
A0A0N7KL40	A0A0N7KL40_ORYSJ	Os05g0522250 protein	Os05g0522250 OSNPB_050522250	Oryza sativa subsp. japonica (Rice)				SILTMAWLSPRRPR	0.98481	-10.086	0	0	0	0	0	0	0	0	0	0	0	0	0	0	0	0	0	0	12.7862	0	0	0	0	0	0	0	0
A0A0N7KL44	A0A0N7KL44_ORYSJ	Os05g0525800 protein	Os05g0525800 OSNPB_050525800	Oryza sativa subsp. japonica (Rice)	protein phosphorylation [GO:0006468]	membrane [GO:0016020]	ATP binding [GO:0005524]; protein kinase activity [GO:0004672]	ARVSTQRLQSTSHP	0.98437	-12.808	0	0	0	0	0	10.1805	0	0	0	0	0	0	0	0	0	0	0	0	0	0	0	0	14.0931	0	0	13.5944	0
A0A0N7KL48	A0A0N7KL48_ORYSJ	Os05g0529400 protein	Os05g0529400 OSNPB_050529400	Oryza sativa subsp. japonica (Rice)				HTQAITPTQLSKMR	0.98769	-10.086	0	0	0	0	0	0	0	0	0	0	0	0	0	0	0	14.3478	0	0	13.5332	0	0	0	0	0	0	0	13.3063
A0A0N7KL82	A0A0N7KL82_ORYSJ	Os05g0558200 protein (Os05g0558600 protein)	Os05g0558200 Os05g0558600 OSNPB_050558200 OSNPB_050558600	Oryza sativa subsp. japonica (Rice)			flavin adenine dinucleotide binding [GO:0050660]	HGGGPLLGHPRWQR	0.98742	-10.086	0	0	0	0	0	0	0	0	0	0	0	0	0	0	0	14.4861	0	0	0	0	0	14.1228	0	12.9848	0	0	0
A0A0N7KLB5	A0A0N7KLB5_ORYSJ	Os05g0583950 protein	Os05g0583950 OSNPB_050583950	Oryza sativa subsp. japonica (Rice)				LRGSANVSFV	0.97176	-3.2084	0	0	0	0	0	0	0	0	0	0	0	0	0	10.2939	0	0	0	0	0	0	0	0	0	0	10.0337	0	0
A0A0N7KLB6	A0A0N7KLB6_ORYSJ	Os05g0584900 protein	Os05g0584900 OSNPB_050584900	Oryza sativa subsp. japonica (Rice)				FDQFKTFSGR	0.96986	-1.8804	0	0	0	0	0	0	0	0	0	0	0	0	0	0	0	0	0	0	0	0	0	0	0	0	0	0	0
A0A0N7KLF5	A0A0N7KLF5_ORYSJ	Os06g0119100 protein	Os06g0119100 OSNPB_060119100	Oryza sativa subsp. japonica (Rice)		membrane [GO:0016020]		VDEIAMK	0.97746	-20.6	0	0	0	10.2574	0	0	0	0	0	0	0	0	0	0	0	0	0	0	11.6955	0	0	0	0	0	0	15.843	0
A0A0N7KLG2	A0A0N7KLG2_ORYSJ	Os06g0126700 protein	Os06g0126700 OSNPB_060126700	Oryza sativa subsp. japonica (Rice)				AAAIGGWTILADRLLISSR	0.98283	-10.25	0	0	0	0	0	0	0	0	0	0	0	0	0	0	0	0	0	0	9.23707	0	0	0	0	0	0	0	0
A0A0N7KLI8	A0A0N7KLI8_ORYSJ	Os06g0146200 protein	Os06g0146200 OSNPB_060146200	Oryza sativa subsp. japonica (Rice)				CLPVAAIGKFSLVGR	0.98407	-10.701	0	0	0	0	0	0	0	8.92781	0	0	0	0	0	0	0	0	0	0	0	0	0	0	0	0	0	0	0
A0A0N7KLJ2	A0A0N7KLJ2_ORYSJ	Os06g0149166 protein	Os06g0149166 OSNPB_060149166	Oryza sativa subsp. japonica (Rice)				GDGGADK	0.97518	-3.6711	0	0	0	0	0	0	0	0	0	0	0	0	0	0	0	0	0	0	0	0	0	0	0	0	0	0	0
A0A0N7KLJ7	A0A0N7KLJ7_ORYSJ	Os06g0153100 protein	Os06g0153100 OSNPB_060153100	Oryza sativa subsp. japonica (Rice)				CSVQPVAAPLLLR	0.98071	-7.7707	0	0	0	0	0	0	0	0	0	0	0	0	0	0	0	8.67553	0	0	0	0	0	0	9.41354	0	0	0	0
A0A0N7KLM0	A0A0N7KLM0_ORYSJ	Os06g0172675 protein	Os06g0172675 OSNPB_060172675	Oryza sativa subsp. japonica (Rice)				HGATELAIVR	0.98395	-11.307	0	10.7706	0	0	0	0	0	0	0	9.91894	0	0	0	0	0	0	0	0	0	0	0	0	0	0	0	0	0
A0A0N7KLN1	A0A0N7KLN1_ORYSJ	Os06g0182450 protein	Os06g0182450 OSNPB_060182450	Oryza sativa subsp. japonica (Rice)				IKQLYKWK	0.98323	-1.7021	0	0	0	0	0	0	0	0	0	0	0	0	0	0	0	0	0	0	0	11.2959	0	0	0	0	0	0	0
A0A0N7KLN3	A0A0N7KLN3_ORYSJ	Os06g0184400 protein	Os06g0184400 OSNPB_060184400	Oryza sativa subsp. japonica (Rice)			phosphoprotein phosphatase activity [GO:0004721]	MINLNCVIIR	0.98561	-8.8442	0	0	0	0	0	0	0	0	0	0	0	0	0	0	0	0	0	0	9.86199	0	0	0	0	0	0	0	0
A0A0N7KLP9	A0A0N7KLP9_ORYSJ	Os06g0197550 protein	Os06g0197550 OSNPB_060197550	Oryza sativa subsp. japonica (Rice)	chaperone cofactor-dependent protein refolding [GO:0051085]	chloroplast [GO:0009507]; mitochondrial matrix [GO:0005759]; plastid [GO:0009536]	ATP binding [GO:0005524]; ATP-dependent protein folding chaperone [GO:0140662]; chaperone binding [GO:0051087]; metal ion binding [GO:0046872]; unfolded protein binding [GO:0051082]	MDNHGKFLFEK	0.98241	-8.0623	0	0	0	0	0	0	0	0	0	0	0	0	0	0	0	0	0	11.0531	0	0	0	0	0	0	0	0	0
A0A0N7KLR2	A0A0N7KLR2_ORYSJ	Os06g0209300 protein	Os06g0209300 OSNPB_060209300	Oryza sativa subsp. japonica (Rice)				ILWDHIFKQNK	0.9783	-17.994	0	0	0	0	0	0	0	0	0	0	0	0	0	0	0	0	0	0	0	10.1201	0	10.8247	0	0	0	9.89046	0
A0A0N7KLT5	A0A0N7KLT5_ORYSJ	Os06g0231350 protein	Os06g0231350 OSNPB_060231350	Oryza sativa subsp. japonica (Rice)				RLLVFLGDVVQR	0.98701	-9.4717	0	0	0	0	0	0	0	0	0	0	0	0	0	0	0	0	0	0	0	0	0	0	0	0	0	0	0
A0A0N7KLT6	A0A0N7KLT6_ORYSJ	Os06g0232100 protein	Os06g0232100 OSNPB_060232100	Oryza sativa subsp. japonica (Rice)				SKTPEFVGHNLVQR	0.96611	-0.001466	0	13.8071	0	0	0	0	0	0	0	0	0	0	0	0	0	0	0	0	0	0	0	0	0	0	0	12.3749	0
A0A0N7KM13	A0A0N7KM13_ORYSJ	Os06g0327300 protein	Os06g0327300 OSNPB_060327300	Oryza sativa subsp. japonica (Rice)				AGLRWLCRDQAR	0.97612	-43.502	0	0	0	0	11.6004	0	0	0	0	0	0	0	0	0	0	0	0	0	0	0	0	0	0	0	0	0	0
A0A0N7KM15	A0A0N7KM15_ORYSJ	Os06g0329700 protein	Os06g0329700 OSNPB_060329700	Oryza sativa subsp. japonica (Rice)				RSSGTKK	0.98473	-13.074	0	9.48625	10.151	15.8196	0	0	0	0	0	0	0	0	0	0	0	0	0	0	0	0	0	0	0	9.57391	0	0	0
A0A0N7KM18	A0A0N7KM18_ORYSJ	Os06g0334100 protein	Os06g0334100 OSNPB_060334100	Oryza sativa subsp. japonica (Rice)				LQSSCLLLHYD	0.97243	-3.1204	0	0	0	0	0	0	0	0	0	0	0	0	0	0	0	0	0	0	0	0	0	0	0	0	0	0	0
A0A0N7KM69	A0A0N7KM69_ORYSJ	Os06g0516200 protein	Os06g0516200 OSNPB_060516200	Oryza sativa subsp. japonica (Rice)				AATLVTTTPVAGAPRHLR	0.97644	-4.7174	11.8215	0	0	0	0	0	0	0	0	0	0	0	0	0	0	0	0	0	0	0	0	0	0	0	0	0	0
A0A0N7KM85	A0A0N7KM85_ORYSJ	Os06g0538650 protein	Os06g0538650 OSNPB_060538650	Oryza sativa subsp. japonica (Rice)				HWTLASIPMTLR	0.97443	-4.8136	0	0	0	0	0	0	0	0	0	0	0	0	0	0	0	0	0	0	0	0	0	0	0	0	0	0	0
A0A0N7KM92	A0A0N7KM92_ORYSJ	Os06g0549050 protein	Os06g0549050 OSNPB_060549050	Oryza sativa subsp. japonica (Rice)				AAAAADGP	0.98046	-0.48983	0	0	0	0	0	0	0	0	0	0	0	0	0	0	0	0	0	0	0	0	9.31329	9.10641	0	0	0	0	0
A0A0N7KMB7	A0A0N7KMB7_ORYSJ	Os06g0581151 protein	Os06g0581151 OSNPB_060581151	Oryza sativa subsp. japonica (Rice)				QERQVLEHLHHK	0.98433	-12.88	8.52685	0	0	0	0	0	0	11.7078	0	0	0	0	0	0	0	0	0	0	0	0	0	0	0	0	0	0	0
A0A0N7KMD6	A0A0N7KMD6_ORYSJ	Os06g0605000 protein	Os06g0605000 OSNPB_060605000	Oryza sativa subsp. japonica (Rice)				HEKHLLDVFRMR	0.96409	-1.6736	0	0	0	0	0	0	0	0	0	0	0	0	0	0	0	0	0	0	0	0	0	0	0	0	0	0	0
A0A0N7KMD9	A0A0N7KMD9_ORYSJ	Os06g0607850 protein	Os06g0607850 OSNPB_060607850	Oryza sativa subsp. japonica (Rice)				TKECRVQNIR	0.97742	-6.2452	0	0	0	0	0	0	0	0	0	0	0	0	0	0	0	0	0	0	0	0	0	0	0	0	0	0	0
A0A0N7KMF2	A0A0N7KMF2_ORYSJ	Os06g0619650 protein	Os06g0619650 OSNPB_060619650	Oryza sativa subsp. japonica (Rice)				RVPYHRR	1.1096	-0.00052908	0	0	0	0	0	10.9402	11.4122	0	0	0	0	0	0	0	0	0	0	0	0	0	0	0	0	0	11.4322	0	0
A0A0N7KMG3	A0A0N7KMG3_ORYSJ	Os06g0632300 protein	Os06g0632300 OSNPB_060632300	Oryza sativa subsp. japonica (Rice)		membrane [GO:0016020]	heme binding [GO:0020037]; iron ion binding [GO:0005506]; oxidoreductase activity, acting on paired donors, with incorporation or reduction of molecular oxygen, NAD(P)H as one donor, and incorporation of one atom of oxygen [GO:0016709]	RSADSSSAQAASCAASVASR	0.98468	-13.075	0	0	0	0	0	0	0	0	0	0	0	0	0	0	0	0	0	0	0	0	0	0	10.5523	0	0	0	0
A0A0N7KMG6	A0A0N7KMG6_ORYSJ	Os06g0635500 protein	Os06g0635500 OSNPB_060635500	Oryza sativa subsp. japonica (Rice)				NQSGSRVDDK	0.98127	-16.095	0	0	0	0	0	0	0	0	0	0	0	0	0	0	0	0	0	0	0	0	0	0	0	14.1407	0	0	0
A0A0N7KMI8	A0A0N7KMI8_ORYSJ	Os06g0656000 protein	Os06g0656000 OSNPB_060656000	Oryza sativa subsp. japonica (Rice)			flavin adenine dinucleotide binding [GO:0050660]; oxidoreductase activity, acting on CH-OH group of donors [GO:0016614]	AGSSGRSPWRTR	0.98456	-8.4849	0	0	0	0	0	0	0	0	0	0	0	0	0	0	0	0	0	12.4902	0	0	0	0	0	0	0	0	0
A0A0N7KMP6	A0A0N7KMP6_ORYSJ	Os06g0705651 protein	Os06g0705651 OSNPB_060705651	Oryza sativa subsp. japonica (Rice)				RLPQYARR	0.98409	-1.7021	0	0	0	0	0	0	0	0	0	0	0	0	0	0	0	0	0	9.24113	0	0	0	0	0	0	0	0	0
A0A0N7KMT0	A0A0N7KMT0_ORYSJ	Os07g0100600 protein	Os07g0100600 OsJ_22763 OSNPB_070100600	Oryza sativa subsp. japonica (Rice)	oligopeptide transport [GO:0006857]	membrane [GO:0016020]	transmembrane transporter activity [GO:0022857]	LAHTEQFR	0.9809	-16.289	9.62432	0	10.2419	0	0	0	0	0	9.59766	0	0	0	0	8.79331	0	11.8591	0	0	0	0	0	0	0	0	0	0	0
A0A0N7KMU8	A0A0N7KMU8_ORYSJ	Os07g0117350 protein	Os07g0117350 OSNPB_070117350	Oryza sativa subsp. japonica (Rice)				EERLQRLLLR	0.97824	-6.8113	0	0	0	0	0	0	0	0	0	0	0	0	0	0	0	0	0	0	0	0	0	0	0	0	0	0	0
A0A0N7KN05	A0A0N7KN05_ORYSJ	Os07g0175000 protein	Os07g0175000 OSNPB_070175000	Oryza sativa subsp. japonica (Rice)	lipid transport [GO:0006869]		lipid binding [GO:0008289]	CYLAIKCR	0.98496	-1.7021	0	0	0	0	0	0	0	12.4493	0	0	0	0	0	0	0	11.6027	0	0	0	0	0	0	0	0	0	0	0
A0A0N7KN31	A0A0N7KN31_ORYSJ	Os07g0197350 protein	Os07g0197350 OSNPB_070197350	Oryza sativa subsp. japonica (Rice)				NNDPFARR	0.98563	-1.7021	0	0	0	0	0	0	0	0	0	0	0	0	0	0	0	0	0	0	0	0	0	0	0	0	0	0	0
A0A0N7KN50	A0A0N7KN50_ORYSJ	Os07g0217850 protein	Os07g0217850 OSNPB_070217850	Oryza sativa subsp. japonica (Rice)				APAVGSR	0.97453	-3.4824	0	0	0	0	0	0	0	0	11.1524	0	0	0	0	12.5368	0	0	12.9125	0	0	0	12.7365	0	0	0	0	0	0
A0A0N7KN53	A0A0N7KN53_ORYSJ	Os07g0222300 protein	Os07g0222300 OSNPB_070222300	Oryza sativa subsp. japonica (Rice)		eukaryotic translation initiation factor 3 complex [GO:0005852]	translation initiation factor activity [GO:0003743]	RIEEGNFVTVPLR	0.97399	-2.2493	0	0	0	0	0	0	0	0	0	0	0	0	0	0	0	0	0	0	0	0	0	0	0	0	0	0	0
A0A0N7KN57	A0A0N7KN57_ORYSJ	Os07g0227800 protein	Os07g0227800 OSNPB_070227800	Oryza sativa subsp. japonica (Rice)	lipid homeostasis [GO:0055088]; mitochondrion organization [GO:0007005]	mitochondrial inner membrane [GO:0005743]; mitochondrial membrane [GO:0031966]		THGGGGR	1.1089	-0.00052908	0	0	0	0	0	0	0	0	0	0	0	0	0	0	0	0	0	0	0	0	0	0	0	0	0	0	0
A0A0N7KN70	A0A0N7KN70_ORYSJ	Os07g0244150 protein	Os07g0244150 OSNPB_070244150	Oryza sativa subsp. japonica (Rice)				TRSAVPVR	0.98492	-1.7021	0	0	11.4833	0	0	0	0	0	0	0	0	0	0	0	0	0	0	0	0	0	0	0	0	0	0	0	0
A0A0N7KN77	A0A0N7KN77_ORYSJ	Os07g0252200 protein	Os07g0252200 OSNPB_070252200	Oryza sativa subsp. japonica (Rice)				IGGTWRRR	0.98202	-15.552	0	0	0	0	0	0	0	0	0	0	0	0	0	0	0	0	0	0	0	0	0	0	0	0	0	0	0
A0A0N7KN90	A0A0N7KN90_ORYSJ	Os07g0273700 protein	Os07g0273700 OSNPB_070273700	Oryza sativa subsp. japonica (Rice)	defense response [GO:0006952]	nucleus [GO:0005634]	ADP binding [GO:0043531]; DNA binding [GO:0003677]	LSHVGRV	0.97375	-3.2089	0	0	0	0	0	0	0	15.7155	0	0	0	0	0	0	0	0	0	0	0	0	0	0	0	0	0	0	0
A0A0N7KN93	A0A0N7KN93_ORYSJ	Os07g0277600 protein	Os07g0277600 OSNPB_070277600	Oryza sativa subsp. japonica (Rice)				LIIVQGLKREYSQNK	0.97595	-1.2683	0	0	0	0	0	0	0	0	0	0	0	0	0	0	0	8.80416	8.67515	8.55528	9.20687	0	0	0	0	0	0	0	0
A0A0N7KNA4	A0A0N7KNA4_ORYSJ	Os07g0297350 protein	Os07g0297350 OSNPB_070297350	Oryza sativa subsp. japonica (Rice)				QQLWVWR	0.96825	-2.0335	0	0	0	0	0	0	0	0	0	0	0	0	0	0	0	0	9.69862	0	0	0	0	0	0	0	0	0	0
A0A0N7KNC9	A0A0N7KNC9_ORYSJ	Os07g0440300 protein	Os07g0440300 OSNPB_070440300	Oryza sativa subsp. japonica (Rice)				LPAAVAMGHSRRR	0.97286	-1.7026	0	0	0	0	0	0	0	0	0	10.1967	0	0	0	0	0	0	0	0	0	0	0	0	0	0	0	0	0
A0A0N7KNE1	A0A0N7KNE1_ORYSJ	Os07g0459500 protein	Os07g0459500 OSNPB_070459500	Oryza sativa subsp. japonica (Rice)				TNILSSVWR	0.97592	-4.5014	0	0	0	11.3369	0	0	0	0	0	0	0	0	0	0	0	0	0	0	0	0	0	0	0	0	0	0	0
A0A0N7KNF6	A0A0N7KNF6_ORYSJ	Os07g0481000 protein	Os07g0481000 OSNPB_070481000	Oryza sativa subsp. japonica (Rice)			metal ion binding [GO:0046872]	AHQTVHWGFHK	0.98299	-10.096	0	0	0	0	0	0	0	0	0	0	0	0	0	0	0	0	0	0	0	0	0	0	0	0	0	0	0
A0A0N7KNH1	A0A0N7KNH1_ORYSJ	Malic enzyme	Os07g0496200 OSNPB_070496200	Oryza sativa subsp. japonica (Rice)	malate metabolic process [GO:0006108]		malate dehydrogenase (decarboxylating) (NAD+) activity [GO:0004471]; metal ion binding [GO:0046872]; NAD binding [GO:0051287]	WAFRLLQR	0.98452	-1.7021	0	0	0	0	0	0	0	0	0	0	0	0	0	0	0	0	0	0	0	0	0	0	0	0	0	0	10.6381
A0A0N7KNJ3	A0A0N7KNJ3_ORYSJ	Os07g0517433 protein	Os07g0517433 OSNPB_070517433	Oryza sativa subsp. japonica (Rice)				CRFGLRPR	0.98523	-1.7021	0	0	0	0	0	0	0	0	0	0	0	0	0	0	0	0	0	0	0	0	0	0	0	0	0	0	0
A0A0N7KNJ8	A0A0N7KNJ8_ORYSJ	Os07g0522400 protein	Os07g0522400 OSNPB_070522400	Oryza sativa subsp. japonica (Rice)				RQEAVRPRWR	0.97759	-6.8113	0	0	0	0	0	0	0	0	0	0	0	0	0	0	0	0	0	0	0	0	0	0	0	0	0	0	0
A0A0N7KNK2	A0A0N7KNK2_ORYSJ	Os07g0526150 protein	Os07g0526150 OSNPB_070526150	Oryza sativa subsp. japonica (Rice)				TVGRRPR	1.0956	-0.00052908	0	0	0	0	0	0	0	10.3016	0	0	0	0	0	0	0	0	0	0	0	0	0	0	0	0	0	0	0
A0A0N7KNM3	A0A0N7KNM3_ORYSJ	Os07g0547000 protein	Os07g0547000 OSNPB_070547000	Oryza sativa subsp. japonica (Rice)				LRDCGRQPR	0.97621	-2.4684	0	0	0	0	0	0	0	0	0	0	0	0	0	0	0	0	0	0	0	0	0	0	0	0	0	0	0
A0A0N7KNM6	A0A0N7KNM6_ORYSJ	Os07g0550432 protein	Os07g0550432 OSNPB_070550432	Oryza sativa subsp. japonica (Rice)				MEALPIDLLAMER	0.98513	-9.2834	0	0	0	0	0	0	0	0	0	0	0	0	0	0	0	0	0	0	0	0	0	0	0	0	0	0	0
A0A0N7KNT4	A0A0N7KNT4_ORYSJ	Os07g0598900 protein	Os07g0598900 OSNPB_070598900	Oryza sativa subsp. japonica (Rice)				NFRLQIDEHNK	0.97363	-3.1204	0	0	0	0	0	0	0	0	0	0	0	0	0	0	0	0	0	0	0	0	0	0	0	0	0	0	0
A0A0N7KNU8	A0A0N7KNU8_ORYSJ	Os07g0612400 protein	Os07g0612400	Oryza sativa subsp. japonica (Rice)				QVGPLSRR	0.98338	-1.7021	0	0	0	0	0	0	0	0	0	0	0	11.268	0	0	0	0	0	0	0	0	0	0	0	0	0	0	0
A0A0N7KNX6	A0A0N7KNX6_ORYSJ	Os07g0638801 protein	Os07g0638801 OSNPB_070638801	Oryza sativa subsp. japonica (Rice)				VVAAGAAIAGGGAALLLQR	0.9828	-10.25	0	0	0	0	0	0	0	0	0	0	0	0	0	0	0	0	11.4136	0	0	0	0	10.7583	0	0	0	0	0
A0A0N7KNX9	A0A0N7KNX9_ORYSJ	Os07g0642000 protein	Os07g0642000 OSNPB_070642000	Oryza sativa subsp. japonica (Rice)				FHAQYPHK	0.97905	-17.585	0	0	0	0	0	0	0	0	0	0	0	0	0	0	0	0	0	0	0	0	0	0	0	0	0	9.7837	0
A0A0N7KNY5	A0A0N7KNY5_ORYSJ	Os07g0646700 protein	Os07g0646700 OSNPB_070646700	Oryza sativa subsp. japonica (Rice)			zinc ion binding [GO:0008270]	GSDLRLCER	0.98143	-10.645	0	0	0	0	0	0	0	0	0	0	0	0	0	0	0	0	0	0	0	0	0	0	9.8398	0	0	0	0
A0A0N7KNZ4	A0A0N7KNZ4_ORYSJ	Os07g0654800 protein	Os07g0654800 OSNPB_070654800	Oryza sativa subsp. japonica (Rice)				GEQLVATVPAGRR	0.98454	-10.985	0	0	0	0	0	0	0	0	0	0	0	0	0	0	0	0	0	0	0	0	0	0	0	0	0	0	0
A0A0N7KP06	A0A0N7KP06_ORYSJ	Os07g0663750 protein	Os07g0663750 OSNPB_070663750	Oryza sativa subsp. japonica (Rice)				DLCLVGDVAARVR	0.98609	-9.2834	0	0	0	0	0	0	0	0	0	0	0	0	0	0	0	0	0	0	0	0	0	0	0	11.6253	0	0	0
A0A0N7KP24	A0A0N7KP24_ORYSJ	Os07g0679250 protein	Os07g0679250 OSNPB_070679250	Oryza sativa subsp. japonica (Rice)				LVASAGSAATRPFR	0.96985	-1.3333	0	0	0	0	0	0	0	0	0	0	0	0	0	0	0	0	0	0	0	0	0	9.21199	0	0	0	0	0
A0A0N7KP29	A0A0N7KP29_ORYSJ	Os07g0683600 protein	Os07g0683600 OSNPB_070683600	Oryza sativa subsp. japonica (Rice)				LPRALASEPTVR	0.98674	-9.4717	0	0	0	0	16.0423	0	0	0	0	0	0	0	0	0	0	0	0	0	0	0	0	0	0	0	0	0	0
A0A0N7KP53	A0A0N7KP53_ORYSJ	Os08g0106900 protein	Os08g0106900 OSNPB_080106900	Oryza sativa subsp. japonica (Rice)		nucleus [GO:0005634]	hydrolase activity [GO:0016787]; metal ion binding [GO:0046872]	FEYLDTK	0.97113	-2.0335	0	0	0	0	12.1215	0	0	0	0	0	0	0	0	0	0	0	0	0	0	0	0	0	11.7145	0	0	0	0
A0A0N7KP56	A0A0N7KP56_ORYSJ	Os08g0109150 protein	Os08g0109150 OSNPB_080109150	Oryza sativa subsp. japonica (Rice)				VPAKCRDLLEMR	0.98589	-7.7702	0	0	0	0	0	0	0	0	0	0	0	0	0	0	0	0	0	0	0	0	12.6075	0	0	0	0	0	0
A0A0N7KP57	A0A0N7KP57_ORYSJ	Os08g0109600 protein	Os08g0109600 OSNPB_080109600	Oryza sativa subsp. japonica (Rice)		box C/D RNP complex [GO:0031428]; small-subunit processome [GO:0032040]	snoRNA binding [GO:0030515]	MEEKPIAK	0.97483	-23.945	0	0	0	0	0	0	0	0	0	0	0	0	0	0	0	0	0	0	0	0	0	0	0	0	0	0	9.68661
A0A0N7KPF4	A0A0N7KPF4_ORYSJ	Os08g0202300 protein	Os08g0202300 OSNPB_080202300	Oryza sativa subsp. japonica (Rice)				SLFASPHLR	0.97511	-4.5014	0	0	0	0	0	0	0	0	0	0	0	0	0	0	0	0	0	0	0	0	0	0	0	9.24272	0	0	0
A0A0N7KPH1	A0A0N7KPH1_ORYSJ	Os08g0226300 protein	Os08g0226300 OSNPB_080226300	Oryza sativa subsp. japonica (Rice)		membrane [GO:0016020]	heme binding [GO:0020037]; iron ion binding [GO:0005506]; monooxygenase activity [GO:0004497]; oxidoreductase activity, acting on paired donors, with incorporation or reduction of molecular oxygen [GO:0016705]	LDAAAPRR	0.98449	-1.7021	0	0	0	0	0	0	0	0	0	0	0	0	0	0	0	0	0	0	0	0	0	0	0	0	0	0	0
A0A0N7KPJ5	A0A0N7KPJ5_ORYSJ	Os08g0259775 protein	Os08g0259775 OSNPB_080259775	Oryza sativa subsp. japonica (Rice)				GDGARRGDQRPR	0.98681	-9.4717	0	0	0	0	0	0	0	0	0	0	0	0	0	0	0	0	0	0	0	0	8.65428	0	0	0	0	0	0
A0A0N7KPK0	A0A0N7KPK0_ORYSJ	Os08g0267600 protein	Os08g0267600 OSNPB_080267600	Oryza sativa subsp. japonica (Rice)				MLEGITCKFENLR	0.98429	-10.985	0	9.40661	0	0	0	0	0	0	0	0	0	0	0	0	0	0	0	0	0	0	0	0	0	0	0	0	0
A0A0N7KPK5	A0A0N7KPK5_ORYSJ	Os08g0275600 protein	Os08g0275600 OSNPB_080275600	Oryza sativa subsp. japonica (Rice)				RGGGDGGGG	0.9762	-6.3225	14.3443	0	14.9813	0	0	13.7669	0	0	0	11.6621	0	0	9.82896	0	0	0	11.0645	11.4277	10.3461	10.4338	0	8.3315	10.6314	10.6164	0	0	9.81213
A0A0N7KPL5	A0A0N7KPL5_ORYSJ	Os08g0290400 protein	Os08g0290400 OSNPB_080290400	Oryza sativa subsp. japonica (Rice)				DLPDYYERRPGAR	0.97798	-18.755	0	0	0	0	0	0	0	0	0	0	0	0	13.1705	0	0	0	0	10.028	0	0	0	0	0	0	0	12.1817	0
A0A0N7KPP5	A0A0N7KPP5_ORYSJ	Os08g0339750 protein	Os08g0339750 OSNPB_080339750	Oryza sativa subsp. japonica (Rice)	histone deacetylation [GO:0016575]; negative regulation of transcription by RNA polymerase II [GO:0000122]	chromatin [GO:0000785]; histone deacetylase complex [GO:0000118]	transcription corepressor activity [GO:0003714]	INTHTVIERVK	0.98369	-8.0623	0	0	0	0	0	0	0	0	0	0	0	0	0	0	0	0	0	17.2591	0	0	0	0	0	0	0	16.8867	0
A0A0N7KPT1	A0A0N7KPT1_ORYSJ	Os08g0390100 protein	Os08g0390100 OSNPB_080390100	Oryza sativa subsp. japonica (Rice)				AIGDLATKEK	0.97808	-18.032	0	0	0	0	0	0	0	0	0	0	0	0	0	0	0	0	0	0	0	0	0	0	0	11.2028	0	0	0
A0A0N7KPV9	A0A0N7KPV9_ORYSJ	Os08g0426000 protein	Os08g0426000 OSNPB_080426000	Oryza sativa subsp. japonica (Rice)	DNA-templated transcription [GO:0006351]	DNA-directed RNA polymerase complex [GO:0000428]	DNA binding [GO:0003677]; DNA-directed 5'-3' RNA polymerase activity [GO:0003899]	RPPPPSRHHRHR	0.98661	-9.4717	0	0	0	0	0	0	0	0	0	0	0	0	0	0	0	0	0	0	0	0	0	0	0	0	0	0	0
A0A0N7KQ21	A0A0N7KQ21_ORYSJ	Os08g0488800 protein	Os08g0488800 OSNPB_080488800	Oryza sativa subsp. japonica (Rice)				VPLFPGPRLSR	0.98337	-8.0623	0	0	0	0	0	11.4942	10.6077	0	0	0	0	0	0	0	0	0	0	0	0	11.3704	12.8943	0	0	0	0	0	0
A0A0N7KQ25	A0A0N7KQ25_ORYSJ	Os08g0493000 protein	Os08g0493000 OSNPB_080493000	Oryza sativa subsp. japonica (Rice)				TGQYKIVHLRR	0.9836	-8.0623	0	0	0	0	0	0	0	0	0	0	0	11.5508	0	11.7233	10.5901	0	11.0592	0	0	0	0	0	0	0	0	0	0
A0A0N7KQ63	A0A0N7KQ63_ORYSJ	Os08g0525700 protein	Os08g0525700 OSNPB_080525700	Oryza sativa subsp. japonica (Rice)				EEELETVGTVVDDPK	0.96913	-1.2935	0	0	0	0	0	10.1658	0	10.4479	0	0	0	0	0	8.95997	10.0704	11.3237	10.8057	0	0	11.216	0	0	0	0	0	9.64656	0
A0A0N7KQ80	A0A0N7KQ80_ORYSJ	Os08g0539500 protein	Os08g0539500 OSNPB_080539500	Oryza sativa subsp. japonica (Rice)				DLNKKPQQLQR	0.98261	-10.096	0	0	0	0	0	0	0	10.4736	0	0	0	0	0	0	0	0	0	0	0	0	0	0	0	0	9.93899	0	0
A0A0N7KQJ7	A0A0N7KQJ7_ORYSJ	Os09g0315150 protein	Os09g0315150 OSNPB_090315150	Oryza sativa subsp. japonica (Rice)				MTKTTVSSHRR	0.98649	-9.7644	0	0	0	0	0	0	0	0	0	0	0	0	0	0	0	0	0	14.0761	0	0	0	0	0	12.8279	0	15.5091	13.7816
A0A0N7KQK6	A0A0N7KQK6_ORYSJ	Os09g0325800 protein	Os09g0325800 OSNPB_090325800	Oryza sativa subsp. japonica (Rice)				DDPRRLR	1.1079	-0.00052908	0	0	0	0	0	0	0	0	0	0	0	0	0	0	0	0	0	0	0	0	0	0	0	0	0	0	0
A0A0N7KQN4	A0A0N7KQN4_ORYSJ	Aminopeptidase (EC 3.4.11.-)	Os09g0362500 OSNPB_090362500	Oryza sativa subsp. japonica (Rice)	proteolysis [GO:0006508]	intracellular membrane-bounded organelle [GO:0043231]; membrane [GO:0016020]	aminopeptidase activity [GO:0004177]; metallopeptidase activity [GO:0008237]; zinc ion binding [GO:0008270]	FQKALTSYIKK	0.97754	-19.786	0	0	12.4623	0	0	0	0	0	0	0	0	0	0	0	0	0	0	0	0	0	0	0	0	0	0	0	0
A0A0N7KQP0	A0A0N7KQP0_ORYSJ	Os09g0368850 protein	Os09g0368850 OSNPB_090368850	Oryza sativa subsp. japonica (Rice)		cytoplasm [GO:0005737]	calcium ion binding [GO:0005509]; calcium-dependent phospholipid binding [GO:0005544]	YSASLERDVSSR	0.98037	-7.7702	0	0	0	0	0	0	0	0	0	0	0	0	0	0	0	0	0	0	0	0	0	0	13.7175	0	0	0	0
A0A0N7KQQ6	A0A0N7KQQ6_ORYSJ	Os09g0386000 protein	Os09g0386000 OSNPB_090386000	Oryza sativa subsp. japonica (Rice)		membrane [GO:0016020]		ARSNVGN	0.96933	-2.5459	0	0	14.8276	0	0	0	0	0	0	0	0	0	0	0	0	15.4219	0	0	16.3212	0	0	14.7594	0	0	0	0	0
A0A0N7KQS4	A0A0N7KQS4_ORYSJ	Os09g0408500 protein	Os09g0408500 OSNPB_090408500	Oryza sativa subsp. japonica (Rice)				GDRIKEWLLVTR	0.97593	-3.7071	0	0	0	0	0	0	0	0	0	0	0	0	0	0	0	0	0	0	0	0	0	0	0	0	0	0	16.0587
A0A0N7KQT4	A0A0N7KQT4_ORYSJ	non-specific serine/threonine protein kinase (EC 2.7.11.1)	Os09g0418500 OSNPB_090418500	Oryza sativa subsp. japonica (Rice)	protein phosphorylation [GO:0006468]; signal transduction [GO:0007165]		ATP binding [GO:0005524]; protein serine kinase activity [GO:0106310]; protein serine/threonine kinase activity [GO:0004674]	EAAAALR	0.97514	-3.6711	0	0	0	0	0	0	0	0	0	0	0	0	0	0	0	0	0	0	0	0	0	0	0	0	0	0	0
A0A0N7KQT7	A0A0N7KQT7_ORYSJ	Os09g0421400 protein	Os09g0421400 OSNPB_090421400	Oryza sativa subsp. japonica (Rice)				ILQCAVGFHHLFNQTHDR	0.98245	-10.393	0	0	0	0	0	0	0	0	0	0	0	0	0	0	0	0	0	0	0	0	0	0	0	0	0	0	0
A0A0N7KQU0	A0A0N7KQU0_ORYSJ	Os09g0424401 protein	Os09g0424401 OSNPB_090424401	Oryza sativa subsp. japonica (Rice)				AASQGRFIATK	0.98368	-8.0623	0	0	0	0	10.274	0	0	0	0	0	0	0	0	0	0	0	0	0	0	0	0	0	0	0	0	0	0
A0A0N7KQU4	A0A0N7KQU4_ORYSJ	Os09g0427551 protein	Os09g0427551 OSNPB_090427551	Oryza sativa subsp. japonica (Rice)				HGRHDALR	0.97938	-17.446	0	0	0	0	0	0	0	0	0	0	0	0	0	9.34474	0	0	0	0	0	0	0	0	0	0	0	0	0
A0A0N7KQU6	A0A0N7KQU6_ORYSJ	Os09g0429766 protein	Os09g0429766 OSNPB_090429766	Oryza sativa subsp. japonica (Rice)			DNA-binding transcription factor activity [GO:0003700]	THTPNQTQVRR	0.98376	-8.0623	0	0	0	0	0	0	0	0	0	0	0	0	0	0	0	0	0	0	0	0	0	0	0	0	0	0	0
A0A0N7KQU8	A0A0N7KQU8_ORYSJ	Os09g0432231 protein	Os09g0432231 OSNPB_090432231	Oryza sativa subsp. japonica (Rice)				SQAHGRLLRHELSAF	0.98314	-10.701	0	12.4918	0	0	0	0	0	0	0	0	0	0	0	0	0	0	0	0	0	0	0	0	0	0	0	0	0
A0A0N7KQV3	A0A0N7KQV3_ORYSJ	Os09g0437100 protein	Os09g0437100 OSNPB_090437100	Oryza sativa subsp. japonica (Rice)				RWHSSSR	0.98525	-10.086	0	0	0	0	0	0	0	0	0	0	0	0	0	0	10.1017	0	0	0	0	0	0	0	0	0	0	0	0
A0A0N7KQV6	A0A0N7KQV6_ORYSJ	Os09g0439850 protein	Os09g0439850 OSNPB_090439850	Oryza sativa subsp. japonica (Rice)				EMATTAAGRGACR	1.1081	-0.00052908	0	0	0	0	0	0	0	11.5825	0	0	0	0	0	0	0	0	0	0	10.6238	0	0	0	0	0	0	0	0
A0A0N7KQW6	A0A0N7KQW6_ORYSJ	Os09g0447950 protein	Os09g0447950 OSNPB_090447950	Oryza sativa subsp. japonica (Rice)				MPRLAPSRR	0.97743	-2.4684	0	0	0	0	0	0	0	0	0	0	0	0	0	0	0	0	0	0	0	0	0	0	11.7537	0	0	0	0
A0A0N7KQW9	A0A0N7KQW9_ORYSJ	Os09g0451266 protein	Os09g0451266 OSNPB_090451266	Oryza sativa subsp. japonica (Rice)				HDGLLLLHQRRR	0.98658	-9.4717	0	0	0	0	0	0	0	0	0	0	0	0	0	0	0	0	0	0	0	0	0	9.95539	0	0	0	0	0
A0A0N7KQX0	A0A0N7KQX0_ORYSJ	Os09g0452700 protein	Os09g0452700 OsJ_29596 OSNPB_090452700	Oryza sativa subsp. japonica (Rice)	translation [GO:0006412]	nucleus [GO:0005634]; plastid [GO:0009536]; ribonucleoprotein complex [GO:1990904]; ribosome [GO:0005840]	mRNA binding [GO:0003729]; structural constituent of ribosome [GO:0003735]	LRGGSRGGYPK	0.98091	-16.125	0	0	0	0	15.5363	0	0	0	0	0	0	0	0	0	0	0	0	0	0	0	0	0	0	9.76049	0	0	0
A0A0N7KQX2	A0A0N7KQX2_ORYSJ	Os09g0453900 protein	Os09g0453900 OSNPB_090453900	Oryza sativa subsp. japonica (Rice)		membrane [GO:0016020]		GKYEGDWVDGK	0.97651	-6.3608	0	0	0	0	0	0	0	0	0	0	0	0	0	0	0	0	0	0	0	0	0	0	0	0	0	0	0
A0A0N7KQY3	A0A0N7KQY3_ORYSJ	Os09g0463300 protein	Os09g0463300 OSNPB_090463300	Oryza sativa subsp. japonica (Rice)				ATAQTISTVPDR	0.97992	-16.566	0	9.9585	0	0	0	0	0	0	0	0	0	0	0	0	0	0	0	0	0	0	0	0	0	0	0	0	0
A0A0N7KR30	A0A0N7KR30_ORYSJ	Os09g0507350 protein	Os09g0507350 OSNPB_090507350	Oryza sativa subsp. japonica (Rice)				HRVPLDLEAQR	0.98424	-12.564	0	0	0	0	0	0	0	12.5167	0	0	0	0	0	0	0	0	0	0	0	0	0	0	0	0	0	0	0
A0A0N7KR34	A0A0N7KR34_ORYSJ	Os09g0510900 protein	Os09g0510900 OSNPB_090510900	Oryza sativa subsp. japonica (Rice)				MGLGYVLLKRLQR	0.98616	-9.2834	11.6234	0	0	10.6782	0	0	0	0	0	0	0	0	0	0	0	0	0	0	0	0	0	0	0	0	0	0	0
A0A0N7KR45	A0A0N7KR45_ORYSJ	inositol-1,3,4-trisphosphate 5/6-kinase (EC 2.7.1.159)	Os09g0518700 OSNPB_090518700	Oryza sativa subsp. japonica (Rice)	inositol trisphosphate metabolic process [GO:0032957]		ATP binding [GO:0005524]; inositol tetrakisphosphate 1-kinase activity [GO:0047325]; inositol-1,3,4-trisphosphate 5-kinase activity [GO:0052726]; inositol-1,3,4-trisphosphate 6-kinase activity [GO:0052725]; magnesium ion binding [GO:0000287]	IFKFYAIGDK	0.97804	-6.8113	0	0	0	9.76089	0	0	0	0	0	0	0	0	0	0	0	0	0	0	0	0	0	0	0	0	0	0	0
A0A0N7KR59	A0A0N7KR59_ORYSJ	Os09g0531850 protein	Os09g0531850 OSNPB_090531850	Oryza sativa subsp. japonica (Rice)				MAADSSCR	0.97774	-3.735	14.1754	13.6171	0	0	0	0	0	0	0	0	0	0	0	0	0	0	0	0	0	0	0	0	0	0	0	0	0
A0A0N7KR72	A0A0N7KR72_ORYSJ	Os09g0541900 protein	Os09g0541900 OSNPB_090541900	Oryza sativa subsp. japonica (Rice)	regulation of protein catabolic process [GO:0042176]	proteasome complex [GO:0000502]	enzyme regulator activity [GO:0030234]	FASTFSADR	0.97596	-4.5014	0	0	0	0	0	0	0	0	0	0	0	0	0	0	0	0	0	0	0	0	0	0	0	0	0	0	0
A0A0N7KR76	A0A0N7KR76_ORYSJ	Os09g0545250 protein	Os09g0545250 OSNPB_090545250	Oryza sativa subsp. japonica (Rice)				TFAYLKER	0.98754	-1.7021	0	0	0	0	0	0	0	0	0	0	0	0	0	0	0	0	0	0	0	0	0	0	0	0	0	0	0
A0A0N7KR82	A0A0N7KR82_ORYSJ	Os09g0549800 protein	Os09g0549800 OSNPB_090549800	Oryza sativa subsp. japonica (Rice)		membrane [GO:0016020]		MPLEWLPR	0.97704	-3.735	0	0	10.7787	0	0	0	0	0	0	0	0	0	0	0	0	0	0	0	0	0	0	0	0	0	0	0	0
A0A0N7KR83	A0A0N7KR83_ORYSJ	Os09g0550650 protein	Os09g0550650 OSNPB_090550650	Oryza sativa subsp. japonica (Rice)				LATQTTVRR	0.97742	-2.4684	0	0	0	0	0	0	0	0	0	0	0	0	10.0626	0	0	0	0	0	0	0	0	0	0	0	0	0	0
A0A0N7KRA4	A0A0N7KRA4_ORYSJ	Os09g0566600 protein	Os09g0566600 OSNPB_090566600	Oryza sativa subsp. japonica (Rice)				NLIEHLDEHK	0.97334	-4.5402	0	0	0	0	0	0	0	0	0	0	0	0	0	0	0	0	0	0	0	0	0	0	0	0	0	0	0
A0A0N7KRA5	A0A0N7KRA5_ORYSJ	Os09g0567366 protein	Os09g0567366 OSNPB_090567366	Oryza sativa subsp. japonica (Rice)				LGLSEHIK	0.97467	-3.2122	0	0	0	0	0	0	0	0	0	0	0	0	0	0	0	0	13.3066	0	0	0	0	0	0	0	0	0	0
A0A0N7KRC3	A0A0N7KRC3_ORYSJ	Os10g0109200 protein	Os10g0109200 OSNPB_100109200	Oryza sativa subsp. japonica (Rice)			hydroxycinnamoyltransferase activity [GO:0050734]; N-acyltransferase activity [GO:0016410]	AFMQLADRHK	0.98681	-9.9802	0	0	0	0	0	0	0	0	0	0	0	0	0	0	0	0	0	0	0	0	0	0	0	0	0	13.5113	0
A0A0N7KRC4	A0A0N7KRC4_ORYSJ	Os10g0110425 protein	Os10g0110425 OSNPB_100110425	Oryza sativa subsp. japonica (Rice)				EGRGLCFL	0.97795	-20.019	0	0	0	0	0	11.1334	0	11.8479	0	0	0	0	0	0	0	10.1919	0	0	0	0	0	0	0	0	0	0	0
A0A0N7KRD3	A0A0N7KRD3_ORYSJ	Os10g0122200 protein	Os10g0122200 OSNPB_100122200	Oryza sativa subsp. japonica (Rice)				HHPRRPPAAVVHR	0.98014	-1.6741	16.0775	0	0	0	0	0	15.7642	0	0	0	0	0	8.67175	15.3587	15.4223	0	0	0	0	0	0	0	0	0	8.98826	0	9.10696
A0A0N7KRF3	A0A0N7KRF3_ORYSJ	Os10g0142600 protein	Os10g0142600 OSNPB_100142600	Oryza sativa subsp. japonica (Rice)	cell surface receptor signaling pathway [GO:0007166]; protein phosphorylation [GO:0006468]	plasma membrane [GO:0005886]	ATP binding [GO:0005524]; protein kinase activity [GO:0004672]	ELNLPELIHK	0.98613	-11.965	0	0	0	0	9.93651	10.6308	0	0	0	0	0	0	0	0	0	0	0	0	0	9.1185	0	9.42023	0	0	0	0	0
A0A0N7KRG3	A0A0N7KRG3_ORYSJ	Os10g0155450 protein	Os10g0155450 OSNPB_100155450	Oryza sativa subsp. japonica (Rice)				STTPASPAGRDPTR	0.98805	-10.086	0	0	0	0	0	0	12.9956	0	0	0	0	0	0	0	0	0	0	0	0	0	0	0	0	0	0	0	0
A0A0N7KRH1	A0A0N7KRH1_ORYSJ	Os10g0162840 protein	Os10g0162840 OSNPB_100162840	Oryza sativa subsp. japonica (Rice)		membrane [GO:0016020]	calcium ion binding [GO:0005509]; polysaccharide binding [GO:0030247]	NRTMPVR	0.97102	-5.0616	0	0	0	0	0	0	0	9.38836	0	0	0	0	0	0	0	0	0	0	0	0	0	0	0	0	0	0	0
A0A0N7KRJ0	A0A0N7KRJ0_ORYSJ	Os10g0185200 protein	Os10g0185200 OSNPB_100185200	Oryza sativa subsp. japonica (Rice)				SVEIQRGER	0.96665	-1.3911	0	0	0	9.44702	0	0	0	0	0	0	0	0	0	0	0	0	0	0	0	0	0	0	0	0	0	0	0
A0A0N7KRJ3	A0A0N7KRJ3_ORYSJ	Os10g0189001 protein	Os10g0189001 OSNPB_100189001	Oryza sativa subsp. japonica (Rice)				RDLQYLYFKNK	0.97424	-3.1204	0	0	0	0	0	0	0	0	0	0	0	0	0	0	0	0	0	0	0	0	0	0	0	0	0	0	0
A0A0N7KRK5	A0A0N7KRK5_ORYSJ	Os10g0209100 protein	Os10g0209100 OSNPB_100209100	Oryza sativa subsp. japonica (Rice)				MSLFVELGRLSLVR	0.97496	-0.0023322	0	0	0	0	0	0	0	0	0	0	0	0	0	0	0	0	0	0	0	0	0	0	0	0	0	0	0
A0A0N7KRM4	A0A0N7KRM4_ORYSJ	Os10g0343951 protein	Os10g0343951 OSNPB_100343951	Oryza sativa subsp. japonica (Rice)				MCAATWK	0.97069	-2.0335	0	0	0	0	0	0	0	0	0	0	0	0	0	0	0	0	0	0	0	0	0	0	0	0	0	0	0
A0A0N7KRP2	A0A0N7KRP2_ORYSJ	Os10g0371450 protein	Os10g0371450 OSNPB_100371450	Oryza sativa subsp. japonica (Rice)				APRLMSSR	0.98263	-14.908	8.8751	13.89	0	0	0	0	0	0	0	0	0	0	0	0	0	0	14.7388	0	10.3162	10.082	14.3401	0	15.347	14.7217	0	13.6276	0
A0A0N7KRR5	A0A0N7KRR5_ORYSJ	Os10g0403600 protein	Os10g0403600 OSNPB_100403600	Oryza sativa subsp. japonica (Rice)				RRQPGVCHAFAR	0.97363	-3.4819	0	0	0	0	0	0	0	0	0	0	0	0	0	0	0	0	0	0	9.54129	0	0	0	0	0	0	0	0
A0A0N7KRT0	A0A0N7KRT0_ORYSJ	Os10g0419250 protein	Os10g0419250 OSNPB_100419250	Oryza sativa subsp. japonica (Rice)				AHVHPLPRRR	0.98364	-8.5133	0	0	0	0	0	0	0	0	0	0	0	0	0	0	0	0	0	0	0	0	17.2238	0	17.0198	0	0	0	11.9021
A0A0N7KRT1	A0A0N7KRT1_ORYSJ	Os10g0420200 protein	Os10g0420200 OsJ_31550 OSNPB_100420200	Oryza sativa subsp. japonica (Rice)				ARDVADLEGQSK	0.97504	-3.4818	0	0	0	0	0	0	0	0	0	0	0	0	0	10.3768	0	0	0	0	0	0	0	0	0	0	0	0	0
A0A0N7KRT7	A0A0N7KRT7_ORYSJ	Os10g0427100 protein	Os10g0427100 OSNPB_100427100	Oryza sativa subsp. japonica (Rice)				SSSLAISFAVRR	0.98672	-9.4717	0	0	0	0	0	0	0	0	9.84029	0	0	0	0	0	0	0	0	0	0	0	0	0	0	0	0	0	0
A0A0N7KRU1	A0A0N7KRU1_ORYSJ	Os10g0432525 protein	Os10g0432525 OSNPB_100432525	Oryza sativa subsp. japonica (Rice)				HGTGRTAR	0.98704	-1.7021	0	0	0	0	0	0	0	0	0	0	0	0	0	0	0	0	0	0	0	0	0	0	0	0	0	0	0
A0A0N7KRW9	A0A0N7KRW9_ORYSJ	cysteine--tRNA ligase (EC 6.1.1.16) (Cysteinyl-tRNA synthetase)	Os10g0463100 OSNPB_100463100	Oryza sativa subsp. japonica (Rice)	cysteinyl-tRNA aminoacylation [GO:0006423]	cytoplasm [GO:0005737]	ATP binding [GO:0005524]; cysteine-tRNA ligase activity [GO:0004817]	MAKADKNFFTIR	0.98672	-9.4717	0	0	0	0	0	0	0	0	0	0	0	0	0	0	0	0	0	0	0	0	0	0	0	0	0	0	0
A0A0N7KRY8	A0A0N7KRY8_ORYSJ	Os10g0481150 protein	Os10g0481150 OSNPB_100481150	Oryza sativa subsp. japonica (Rice)				LGVVPPA	1.0865	-0.00052908	16.3421	0	0	16.3333	0	0	16.1937	16.084	0	16.1903	16.2171	0	15.9312	15.7367	0	0	0	0	0	0	16.676	16.9091	16.9372	16.8824	0	0	0
A0A0N7KRZ1	A0A0N7KRZ1_ORYSJ	Os10g0483800 protein	Os10g0483800 OSNPB_100483800	Oryza sativa subsp. japonica (Rice)				AAAAGEAARR	0.98005	-6.8113	0	0	0	0	0	0	0	0	0	0	0	0	0	0	0	0	0	0	0	0	0	0	0	0	0	0	0
A0A0N7KS47	A0A0N7KS47_ORYSJ	Os10g0534600 protein	Os10g0534600 OSNPB_100534600	Oryza sativa subsp. japonica (Rice)				LRPAHVVSGGVR	0.98481	-11.505	0	0	0	0	0	0	0	0	0	0	0	0	0	0	0	0	0	0	0	0	0	10.1392	0	0	0	0	0
A0A0N7KS54	A0A0N7KS54_ORYSJ	protein-serine/threonine phosphatase (EC 3.1.3.16)	Os10g0541200 OSNPB_100541200	Oryza sativa subsp. japonica (Rice)	protein dephosphorylation [GO:0006470]		metal ion binding [GO:0046872]; myosin phosphatase activity [GO:0017018]	HHLTSIR	0.96999	-2.0335	0	0	0	0	0	0	0	0	0	0	0	0	0	0	0	0	0	0	0	0	0	0	0	0	0	0	0
A0A0N7KS55	A0A0N7KS55_ORYSJ	Os10g0542200 protein	Os10g0542200 OSNPB_100542200	Oryza sativa subsp. japonica (Rice)				LLGNLGQ	0.96981	-2.0335	0	0	0	0	0	0	0	0	0	0	0	0	0	0	0	0	0	0	0	0	0	0	0	0	0	0	0
A0A0N7KS65	A0A0N7KS65_ORYSJ	Os10g0550750 protein	Os10g0550750 OSNPB_100550750	Oryza sativa subsp. japonica (Rice)				LGRPRKDCNLLK	0.97757	-21.62	0	0	0	0	0	0	0	0	0	0	0	0	0	8.98715	0	0	0	0	0	0	0	0	0	0	0	0	0
A0A0N7KS79	A0A0N7KS79_ORYSJ	Os10g0561900 protein	Os10g0561900 OSNPB_100561900	Oryza sativa subsp. japonica (Rice)	phospholipid biosynthetic process [GO:0008654]; protein dephosphorylation [GO:0006470]		phosphatidylglycerophosphatase activity [GO:0008962]; protein tyrosine/serine/threonine phosphatase activity [GO:0008138]	MRVAFDAKR	0.97822	-2.4684	0	0	0	0	0	0	0	0	0	0	0	0	0	0	0	0	0	0	0	0	0	12.1065	0	0	0	0	0
A0A0N7KSB5	A0A0N7KSB5_ORYSJ	Os11g0109666 protein	Os11g0109666 OSNPB_110109666	Oryza sativa subsp. japonica (Rice)				DHRPVSVAVTLR	0.97499	-4.8136	0	0	0	0	0	0	0	0	0	0	0	0	0	0	0	0	0	0	0	0	0	0	0	0	0	0	0
A0A0N7KSI6	A0A0N7KSI6_ORYSJ	Os11g0177301 protein	Os11g0177301 OSNPB_110177301	Oryza sativa subsp. japonica (Rice)		membrane [GO:0016020]		HADGHLR	0.97064	-2.0335	10.8863	0	0	0	0	0	0	14.1753	0	0	0	0	0	0	0	0	0	0	0	0	0	0	0	0	0	0	0
A0A0N7KSK9	A0A0N7KSK9_ORYSJ	Os11g0203200 protein	Os11g0203200 OSNPB_110203200	Oryza sativa subsp. japonica (Rice)				MSDMAERRELR	0.97802	-6.3608	0	0	0	0	0	0	0	9.76079	0	0	0	0	0	0	0	0	0	0	0	0	0	0	0	0	0	0	0
A0A0N7KSL6	A0A0N7KSL6_ORYSJ	Os11g0209450 protein	Os11g0209450 OSNPB_110209450	Oryza sativa subsp. japonica (Rice)				ARGSLAPPPRLPWR	0.98818	-10.086	0	0	0	0	0	0	0	0	0	0	0	0	15.147	0	0	0	0	0	0	0	0	0	0	0	0	0	0
A0A0N7KSM5	A0A0N7KSM5_ORYSJ	Os11g0218678 protein	Os11g0218678 OSNPB_110218678	Oryza sativa subsp. japonica (Rice)				RRLITHATAK	0.98033	-6.8113	0	0	0	0	0	0	0	0	0	0	0	0	0	0	0	0	0	0	0	9.28214	0	0	0	0	0	0	0
A0A0N7KSN9	A0A0N7KSN9_ORYSJ	Os11g0234950 protein	Os11g0234950 OSNPB_110234950	Oryza sativa subsp. japonica (Rice)				ASPLRRLPPTGR	0.97547	-25.035	0	0	0	14.4047	0	0	0	0	0	0	0	0	0	0	0	0	0	0	0	0	0	0	0	10.4451	0	0	0
A0A0N7KSR7	A0A0N7KSR7_ORYSJ	Os11g0272900 protein	Os11g0272900 OSNPB_110272900	Oryza sativa subsp. japonica (Rice)				EEGVTRQPR	0.96726	-1.3911	9.47723	0	0	0	0	0	0	0	0	0	0	0	0	0	0	0	0	0	0	0	0	0	0	0	0	0	0
A0A0N7KSS5	A0A0N7KSS5_ORYSJ	Os11g0291475 protein	Os11g0291475 OSNPB_110291475	Oryza sativa subsp. japonica (Rice)				CGEPARR	0.97629	-6.2457	0	0	0	0	0	0	0	0	0	0	0	0	0	0	0	0	0	0	0	0	0	0	0	0	0	0	0
A0A0N7KSS9	A0A0N7KSS9_ORYSJ	Os11g0297400 protein	Os11g0297400 OSNPB_110297400	Oryza sativa subsp. japonica (Rice)				LRPPLVHRDPQPRHPGR	0.98001	-16.815	0	0	12.8226	11.6213	0	0	0	0	0	0	0	0	0	0	0	0	0	12.3927	0	0	9.08385	13.0608	0	13.1412	0	0	0
A0A0N7KST2	A0A0N7KST2_ORYSJ	Os11g0302750 protein	Os11g0302750 OSNPB_110302750	Oryza sativa subsp. japonica (Rice)				EQQRLIL	0.97111	-5.0616	0	0	0	0	0	0	0	0	0	0	0	0	0	0	0	0	0	0	0	0	0	0	0	0	14.8657	0	0
A0A0N7KSU2	A0A0N7KSU2_ORYSJ	Os11g0417350 protein	Os11g0417350 OSNPB_110417350	Oryza sativa subsp. japonica (Rice)				QEEDSKEKGK	0.98016	-6.8113	0	0	0	0	0	0	0	0	0	0	0	0	0	0	0	0	0	0	0	0	0	0	0	0	0	0	0
A0A0N7KSW1	A0A0N7KSW1_ORYSJ	Os11g0455500 protein	Os11g0455500 OSNPB_110455500	Oryza sativa subsp. japonica (Rice)	one-carbon metabolic process [GO:0006730]; S-adenosylmethionine cycle [GO:0033353]	cytosol [GO:0005829]	adenosylhomocysteinase activity [GO:0004013]	KVYVLPKHLDEK	0.96032	-1.6736	0	0	0	0	0	0	0	0	0	0	0	0	0	0	0	0	0	0	0	0	0	0	8.8247	0	0	0	0
A0A0N7KSW5	A0A0N7KSW5_ORYSJ	Os11g0461132 protein	Os11g0461132 OSNPB_110461132	Oryza sativa subsp. japonica (Rice)				RKIIEVEDK	0.97719	-2.4684	0	0	0	0	0	0	0	0	0	0	0	0	0	0	0	0	0	0	0	0	0	9.79492	0	0	0	0	0
A0A0N7KSY3	A0A0N7KSY3_ORYSJ	Os11g0492300 protein	Os11g0492300 OSNPB_110492300	Oryza sativa subsp. japonica (Rice)	defense response [GO:0006952]		ADP binding [GO:0043531]	ELSELVDPRNKLVK	0.98288	-15.522	0	0	0	0	0	0	0	0	0	0	0	0	0	0	0	0	0	0	0	0	0	0	0	0	0	0	0
A0A0N7KSZ0	A0A0N7KSZ0_ORYSJ	Os11g0507300 protein	Os11g0507300 OSNPB_110507300	Oryza sativa subsp. japonica (Rice)	regulation of DNA-templated transcription [GO:0006355]	nucleus [GO:0005634]	DNA-binding transcription factor activity [GO:0003700]; sequence-specific DNA binding [GO:0043565]	RRPRHPPGLPVAGVPPGAR	0.98288	-10.25	0	0	0	0	0	0	0	0	10.8935	0	0	0	0	0	0	0	0	0	0	0	0	0	0	0	0	0	0
A0A0N7KSZ9	A0A0N7KSZ9_ORYSJ	Os11g0523400 protein	Os11g0523400 OSNPB_110523400	Oryza sativa subsp. japonica (Rice)				YIITVEKVDR	0.97191	-3.2084	0	0	0	0	0	0	0	0	0	0	0	0	0	0	0	0	0	0	9.59641	0	0	0	0	0	0	0	0
A0A0N7KT11	A0A0N7KT11_ORYSJ	Os11g0538700 protein	Os11g0538700 OSNPB_110538700	Oryza sativa subsp. japonica (Rice)				VSPLQRR	1.0999	-0.00052908	0	15.4836	15.6084	0	0	15.4531	15.0878	0	15.0419	14.9405	0	14.9931	0	0	0	0	0	0	15.7361	0	0	0	0	15.883	14.9656	15.0391	0
A0A0N7KT30	A0A0N7KT30_ORYSJ	Os11g0559533 protein	Os11g0559533 OSNPB_110559533	Oryza sativa subsp. japonica (Rice)				VDRGGSVLGR	0.98685	-9.4535	0	0	0	0	0	0	0	0	0	0	0	0	0	0	0	0	0	0	0	0	0	0	0	10.395	0	0	0
A0A0N7KT40	A0A0N7KT40_ORYSJ	Os11g0574233 protein	Os11g0574233 OSNPB_110574233	Oryza sativa subsp. japonica (Rice)				KEMQHIKQNHSK	0.98992	-7.7702	0	0	0	0	0	0	0	0	0	0	0	0	0	0	0	0	0	0	12.3342	0	0	0	0	0	0	0	0
A0A0N7KT41	A0A0N7KT41_ORYSJ	Os11g0575150 protein	Os11g0575150 OSNPB_110575150	Oryza sativa subsp. japonica (Rice)				AGLVGGVACVPRLSDTPRR	0.98418	-13.649	0	0	0	0	0	0	0	0	0	0	0	0	0	0	0	0	0	0	0	0	0	0	0	0	0	0	0
A0A0N7KT49	A0A0N7KT49_ORYSJ	Os11g0584400 protein	Os11g0584400 OSNPB_110584400	Oryza sativa subsp. japonica (Rice)				GEPACVGRGGR	0.96891	-2.5454	0	0	0	0	0	0	0	0	0	0	0	0	0	0	0	0	0	0	0	0	0	0	0	0	0	0	0
A0A0N7KTC5	A0A0N7KTC5_ORYSJ	Os11g0677500 protein	Os11g0677500 OSNPB_110677500	Oryza sativa subsp. japonica (Rice)	RNA phosphodiester bond hydrolysis, endonucleolytic [GO:0090502]; tRNA 5'-leader removal [GO:0001682]; tRNA processing [GO:0008033]	nucleolar ribonuclease P complex [GO:0005655]; ribonuclease MRP complex [GO:0000172]		MWRPFLR	0.97122	-2.0335	0	0	0	0	0	0	0	12.5463	0	0	0	0	0	0	0	0	0	0	0	0	0	0	0	0	0	0	0
A0A0N7KTC6	A0A0N7KTC6_ORYSJ	Os11g0679400 protein	Os11g0679400 OSNPB_110679400	Oryza sativa subsp. japonica (Rice)				REDDHKGVK	0.97714	-2.4684	0	0	0	0	0	0	0	0	10.6392	0	0	0	0	0	0	0	0	0	0	0	0	0	0	0	0	0	0
A0A0N7KTD6	A0A0N7KTD6_ORYSJ	Os11g0691650 protein	Os11g0691650 OSNPB_110691650	Oryza sativa subsp. japonica (Rice)	cell surface receptor signaling pathway [GO:0007166]; protein phosphorylation [GO:0006468]	plasma membrane [GO:0005886]	ATP binding [GO:0005524]; protein serine/threonine kinase activity [GO:0004674]	AKYDDGRSLPIEFVNR	0.98346	-14.523	0	0	0	0	0	0	0	0	0	0	0	0	0	0	0	0	0	0	0	0	0	11.7196	0	0	0	0	0
A0A0N7KTF5	A0A0N7KTF5_ORYSJ	Os12g0104250 protein	Os12g0104250 OSNPB_120104250	Oryza sativa subsp. japonica (Rice)				ELLRSIYIKPR	0.98505	-8.0623	0	0	0	0	0	0	0	0	0	0	0	0	0	0	0	0	0	0	0	0	0	9.82369	0	0	0	0	0
A0A0N7KTH4	A0A0N7KTH4_ORYSJ	Os12g0117800 protein	Os12g0117800 OSNPB_120117800	Oryza sativa subsp. japonica (Rice)		membrane [GO:0016020]		TQPVIES	1.1101	-0.00052908	0	0	0	0	0	0	0	0	0	0	0	0	0	0	0	0	0	0	0	0	0	0	0	0	0	0	9.70976
A0A0N7KTJ3	A0A0N7KTJ3_ORYSJ	Os12g0134000 protein	Os12g0134000 OSNPB_120134000	Oryza sativa subsp. japonica (Rice)			metal ion binding [GO:0046872]	MSSLEEPLGLGDLPK	0.97068	-2.4035	0	0	0	0	13.2429	13.2455	0	13.2596	0	0	0	0	0	0	0	0	13.4047	13.4614	0	0	0	0	0	0	0	0	0
A0A0N7KTL1	A0A0N7KTL1_ORYSJ	Os12g0152500 protein	Os12g0152500 OSNPB_120152500	Oryza sativa subsp. japonica (Rice)				ELVDELGIYLLAFDR	0.98411	-13.246	0	0	0	0	0	0	0	0	0	0	0	0	0	0	0	0	0	0	0	0	0	0	0	0	0	0	0
A0A0N7KTM5	A0A0N7KTM5_ORYSJ	Os12g0166600 protein	Os12g0166600 OSNPB_120166600	Oryza sativa subsp. japonica (Rice)	defense response [GO:0006952]; response to other organism [GO:0051707]		ADP binding [GO:0043531]; ATP binding [GO:0005524]	YVPHFDR	0.97136	-2.0335	0	0	0	0	0	0	0	0	0	0	0	0	0	0	0	11.1257	0	0	0	0	0	0	0	0	0	0	0
A0A0N7KTN0	A0A0N7KTN0_ORYSJ	Os12g0171500 protein	Os12g0171500 OSNPB_120171500	Oryza sativa subsp. japonica (Rice)				TTKGVNLYQFLK	0.98683	-9.4717	0	0	9.16154	0	0	0	0	0	0	0	0	0	0	0	0	0	0	0	0	0	0	0	0	0	0	0	0
A0A0N7KTP4	A0A0N7KTP4_ORYSJ	Os12g0188700 protein	Os12g0188700 OSNPB_120188700	Oryza sativa subsp. japonica (Rice)				MIAPVIDELAK	0.98488	-10.095	0	0	0	0	0	0	0	0	0	0	0	0	0	0	0	0	0	0	0	0	0	0	0	0	0	0	13.8127
A0A0N7KTP8	A0A0N7KTP8_ORYSJ	Os12g0192800 protein	Os12g0192800 OSNPB_120192800	Oryza sativa subsp. japonica (Rice)	trehalose biosynthetic process [GO:0005992]		trehalose-phosphatase activity [GO:0004805]	EIVSKHLDAELVK	0.98515	-9.0604	0	0	9.88454	0	0	0	0	0	0	0	0	0	0	0	0	0	0	0	0	0	0	12.5694	0	0	0	0	0
A0A0N7KTS0	A0A0N7KTS0_ORYSJ	Os12g0225150 protein	Os12g0225150 OSNPB_120225150	Oryza sativa subsp. japonica (Rice)		membrane [GO:0016020]		VASHLIGLKWRHPPR	0.97665	-1.2683	0	0	0	0	0	0	0	0	0	0	0	0	0	0	0	0	0	0	0	0	0	0	0	0	0	0	0
A0A0N7KTW6	A0A0N7KTW6_ORYSJ	Os12g0288000 protein	Os12g0288000 OSNPB_120288000	Oryza sativa subsp. japonica (Rice)		membrane [GO:0016020]		YVTLVHM	1.102	-0.00052908	0	0	0	0	0	0	0	0	0	0	0	0	0	0	0	0	0	0	0	0	0	0	0	0	0	0	0
A0A0N7KTX5	A0A0N7KTX5_ORYSJ	Os12g0406466 protein	Os12g0406466 OSNPB_120406466	Oryza sativa subsp. japonica (Rice)				APQSHNR	0.9811	-6.3935	0	0	0	0	0	0	0	0	0	0	0	0	0	0	0	0	0	0	0	0	0	0	0	0	0	0	0
A0A0N7KTZ2	A0A0N7KTZ2_ORYSJ	Os12g0438200 protein	Os12g0438200 OSNPB_120438200	Oryza sativa subsp. japonica (Rice)				RHLTTLWQPLMR	0.98787	-7.7702	0	0	0	0	0	0	0	0	0	0	0	0	0	0	0	0	0	0	0	0	0	0	0	0	0	0	0
A0A0N7KTZ3	A0A0N7KTZ3_ORYSJ	Os12g0439201 protein	Os12g0439201 OSNPB_120439201	Oryza sativa subsp. japonica (Rice)				LQRRPAPATVVRR	0.98263	-10.985	0	0	0	0	0	0	0	0	0	0	0	0	0	0	0	0	0	0	0	0	9.70373	0	0	0	0	0	0
A0A0N7KTZ7	A0A0N7KTZ7_ORYSJ	Os12g0447155 protein	Os12g0447155 OSNPB_120447155	Oryza sativa subsp. japonica (Rice)		membrane [GO:0016020]		SAATHLP	1.1007	-0.00052908	0	0	0	0	0	0	0	0	0	0	0	0	0	0	0	0	9.89072	9.27708	0	0	0	0	0	0	0	0	0
A0A0N7KTZ9	A0A0N7KTZ9_ORYSJ	Os12g0454701 protein	Os12g0454701 OSNPB_120454701	Oryza sativa subsp. japonica (Rice)				DGDGGGARGR	0.97834	-6.8113	0	0	0	0	0	0	0	0	0	0	0	0	0	0	0	0	0	0	0	0	0	0	0	0	0	0	0
A0A0N7KU00	A0A0N7KU00_ORYSJ	Os12g0456000 protein	Os12g0456000 OSNPB_120456000	Oryza sativa subsp. japonica (Rice)				HTRRAPR	1.1103	-0.00052908	0	0	0	0	0	0	0	0	0	0	0	0	0	0	0	0	0	0	0	0	0	0	0	0	0	0	0
A0A0N7KU12	A0A0N7KU12_ORYSJ	Os12g0479150 protein	Os12g0479150 OSNPB_120479150	Oryza sativa subsp. japonica (Rice)				IIVVGHGVLTGSAPPGAR	0.98414	-14.127	0	10.8482	0	0	0	0	0	0	0	0	0	0	0	0	0	0	0	0	0	0	0	0	0	0	0	0	0
A0A0N7KU16	A0A0N7KU16_ORYSJ	Os12g0484150 protein	Os12g0484150 OSNPB_120484150	Oryza sativa subsp. japonica (Rice)				ESPTAQGR	0.97822	-3.735	0	0	0	0	0	0	0	0	0	0	0	0	0	0	0	0	0	0	0	0	0	0	0	0	0	0	0
A0A0N7KU45	A0A0N7KU45_ORYSJ	Os12g0519501 protein	Os12g0519501 OSNPB_120519501	Oryza sativa subsp. japonica (Rice)				DLLPTPVACK	0.98507	-8.8442	0	0	0	0	0	0	0	0	0	0	0	0	0	0	0	0	0	0	0	9.76952	0	0	0	0	0	0	0
A0A0N7KU49	A0A0N7KU49_ORYSJ	Os12g0528801 protein	Os12g0528801 OSNPB_120528801	Oryza sativa subsp. japonica (Rice)				FLKIYCFR	0.98684	-1.7021	0	0	0	0	0	0	0	0	0	0	0	0	0	0	0	0	0	0	0	0	0	0	0	0	0	0	0
A0A0N7KU56	A0A0N7KU56_ORYSJ	Os12g0539025 protein	Os12g0539025 OSNPB_120539025	Oryza sativa subsp. japonica (Rice)				LSSGRWPSR	0.97716	-2.4684	15.7027	0	0	0	0	0	14.9403	15.0168	0	0	15.8432	0	14.2842	0	14.102	0	0	0	0	0	0	0	15.1269	0	15.9136	15.9417	0
A0A0N7KU74	A0A0N7KU74_ORYSJ	Os12g0559100 protein	Os12g0559100 OSNPB_120559100	Oryza sativa subsp. japonica (Rice)				AAALPQRGPLR	0.98412	-8.0623	0	0	0	0	0	0	0	0	0	0	0	0	0	0	0	0	0	0	0	0	0	0	0	0	0	0	0
A0A0N7KU82	A0A0N7KU82_ORYSJ	Os12g0566000 protein	Os12g0566000 OSNPB_120566000	Oryza sativa subsp. japonica (Rice)		membrane [GO:0016020]	solute:inorganic anion antiporter activity [GO:0005452]	GLVDEFRIPERENR	0.9827	-14.996	0	0	0	0	0	0	0	0	0	0	0	0	0	0	0	0	0	0	0	0	0	0	0	0	0	0	0
A0A0N7KU95	A0A0N7KU95_ORYSJ	Os12g0577900 protein	Os12g0577900 OSNPB_120577900	Oryza sativa subsp. japonica (Rice)				EPAVLGVGVDK	0.98439	-12.564	0	0	0	0	0	0	0	0	0	0	0	0	0	10.7266	0	0	0	0	0	0	0	0	0	0	11.2367	0	0
A0A0N7KUA3	A0A0N7KUA3_ORYSJ	Os12g0587100 protein	Os12g0587100 OSNPB_120587100	Oryza sativa subsp. japonica (Rice)			RNA binding [GO:0003723]	FVPRPNHWLK	0.98514	-8.8442	0	0	0	0	0	0	0	0	0	0	0	0	0	0	0	0	0	11.1037	0	0	0	0	0	0	0	0	0
A0A0N7KUA5	A0A0N7KUA5_ORYSJ	Os12g0589732 protein	Os12g0589732 OSNPB_120589732	Oryza sativa subsp. japonica (Rice)				MVRWGDLRGDSK	0.98589	-7.7702	0	0	0	0	0	0	0	0	0	0	0	8.93673	0	0	0	0	0	0	0	0	0	0	0	0	0	0	0
A0A0N7KUA8	A0A0N7KUA8_ORYSJ	Os12g0593300 protein	Os12g0593300 OSNPB_120593300	Oryza sativa subsp. japonica (Rice)		membrane [GO:0016020]		AGQLHPSSSR	0.98529	-8.8442	0	0	0	0	0	0	0	0	0	0	0	0	0	0	0	0	0	0	0	0	0	0	0	0	0	0	0
A0A0N7KUB6	A0A0N7KUB6_ORYSJ	Os12g0601800 protein	Os12g0601800 OSNPB_120601800	Oryza sativa subsp. japonica (Rice)		nucleus [GO:0005634]	DNA binding [GO:0003677]; DNA-binding transcription factor activity [GO:0003700]	SPSVRRVASLENLQK	0.98318	-10.701	0	0	0	0	0	0	0	0	0	0	0	0	0	0	0	0	0	13.3597	0	0	0	0	0	0	0	0	0
A0A0N7KUB7	A0A0N7KUB7_ORYSJ	Os12g0604200 protein	Os12g0604200 OSNPB_120604200	Oryza sativa subsp. japonica (Rice)	auxin-activated signaling pathway [GO:0009734]; leaf vascular tissue pattern formation [GO:0010305]; phloem or xylem histogenesis [GO:0010087]			TVGRWLKER	0.96838	-1.3911	0	0	0	0	0	0	0	0	0	0	0	0	0	0	0	0	0	0	0	0	0	0	10.6842	0	0	0	0
A0A0N7KUC4	A0A0N7KUC4_ORYSJ	Os12g0609900 protein	Os12g0609900 OSNPB_120609900	Oryza sativa subsp. japonica (Rice)				LVAAEIDPWWPR	0.97506	-3.4819	0	0	0	0	0	0	0	0	0	0	0	0	0	0	8.5789	0	0	0	0	0	0	0	0	0	0	0	0
A0A0N7KUC8	A0A0N7KUC8_ORYSJ	Os12g0613150 protein	Os12g0613150 OSNPB_120613150	Oryza sativa subsp. japonica (Rice)				DVRQVPR	0.97996	-7.9478	0	0	10.1275	0	0	0	0	0	0	10.4337	0	0	0	9.74606	9.83678	10.6322	0	0	0	0	0	10.4372	0	10.4856	0	0	0
A0A0N7KUD2	A0A0N7KUD2_ORYSJ	Os12g0615300 protein	Os12g0615300 OSNPB_120615300	Oryza sativa subsp. japonica (Rice)		membrane [GO:0016020]	calcium ion binding [GO:0005509]	SDGTNYGCRPLR	0.98467	-11.505	0	0	0	0	0	0	0	0	0	0	0	0	0	0	0	0	0	0	0	0	0	0	0	10.9204	0	0	0
A0A0N7KUE2	A0A0N7KUE2_ORYSJ	Os12g0624500 protein	Os12g0624500 OSNPB_120624500	Oryza sativa subsp. japonica (Rice)				AVARSKTTVK	0.97495	-33.04	0	0	0	0	0	0	0	0	0	0	0	16.3533	0	0	0	9.76437	0	12.2682	0	0	0	0	0	17.5588	0	0	0
A0A0P0UX30	A0A0P0UX30_ORYSJ	Os01g0110901 protein	Os01g0110901 OSNPB_010110901	Oryza sativa subsp. japonica (Rice)				TQESLRRSTPGK	0.9869	-9.4717	0	0	0	0	0	0	0	0	0	0	0	0	0	0	0	0	0	0	0	0	0	0	0	0	0	0	0
A0A0P0UX66	A0A0P0UX66_ORYSJ	non-specific serine/threonine protein kinase (EC 2.7.11.1)	Os01g0106700 OSNPB_010106700	Oryza sativa subsp. japonica (Rice)	DNA damage checkpoint signaling [GO:0000077]; DNA repair [GO:0006281]; negative regulation of TORC1 signaling [GO:1904262]; protein phosphorylation [GO:0006468]; telomere maintenance [GO:0000723]	nucleus [GO:0005634]	ATP binding [GO:0005524]; protein serine/threonine kinase activity [GO:0004674]	AIPEILEK	0.97568	-23.538	0	0	0	0	0	0	12.2844	12.29	10.8238	11.8401	11.7223	11.6991	0	0	0	9.6982	0	11.8493	0	0	11.4347	0	12.3424	0	0	0	0
A0A0P0UX88	A0A0P0UX88_ORYSJ	Os01g0108000 protein	Os01g0108000 P0005A05.37 P0482C06.15	Oryza sativa subsp. japonica (Rice)				KGEIVRFYANDQR	0.97794	-18.755	0	0	0	0	0	0	0	0	0	0	0	0	0	0	8.39695	0	0	0	0	0	0	0	0	12.6805	0	0	0
A0A0P0UX97	A0A0P0UX97_ORYSJ	leucine--tRNA ligase (EC 6.1.1.4)	Os01g0120300 OSNPB_010120300	Oryza sativa subsp. japonica (Rice)	embryo development ending in seed dormancy [GO:0009793]; leucyl-tRNA aminoacylation [GO:0006429]	chloroplast [GO:0009507]; cytosol [GO:0005829]; mitochondrion [GO:0005739]	aminoacyl-tRNA editing activity [GO:0002161]; ATP binding [GO:0005524]; leucine-tRNA ligase activity [GO:0004823]	GGHPVIRKPMR	0.98507	-8.0623	0	0	0	0	0	0	0	0	0	0	0	0	0	0	0	0	0	0	0	0	0	0	0	0	0	0	0
A0A0P0UXB9	A0A0P0UXB9_ORYSJ	Os01g0117025 protein	Os01g0117025 OSNPB_010117025	Oryza sativa subsp. japonica (Rice)				LFLADRSRTDSHTA	0.98561	-10.086	0	0	0	0	0	0	0	0	0	0	12.0856	0	0	0	0	0	0	0	0	0	0	0	0	0	0	0	0
A0A0P0UXC4	A0A0P0UXC4_ORYSJ	Os01g0120800 protein	Os01g0120800 OSNPB_010120800	Oryza sativa subsp. japonica (Rice)		eukaryotic translation initiation factor 3 complex [GO:0005852]		AFQFCKQYKR	0.98028	-6.8113	0	0	0	0	0	0	0	0	0	0	0	9.72807	0	0	0	0	0	0	0	0	0	0	0	0	0	0	0
A0A0P0UXD9	A0A0P0UXD9_ORYSJ	Os01g0122534 protein	Os01g0122534 OSNPB_010122534	Oryza sativa subsp. japonica (Rice)				RAGEAAAGLR	0.9807	-6.8113	0	0	0	0	0	0	0	0	0	0	0	0	0	0	0	0	0	0	0	0	0	0	0	9.7922	0	0	0
A0A0P0UXE3	A0A0P0UXE3_ORYSJ	Os01g0124550 protein	Os01g0124550 OSNPB_010124550	Oryza sativa subsp. japonica (Rice)				GADEVLDPRR	0.97958	-6.8113	0	0	0	0	0	0	0	0	0	0	0	0	0	0	0	0	0	0	0	0	0	0	0	0	0	0	0
A0A0P0UXG2	A0A0P0UXG2_ORYSJ	Os01g0103400 protein	Os01g0103400 OSNPB_010103400	Oryza sativa subsp. japonica (Rice)				ALPSRGGAPPAPILPSR	0.98616	-12.272	0	0	0	0	0	0	0	0	0	0	0	0	0	0	0	0	0	0	0	0	0	11.3745	0	0	0	0	0
A0A0P0UXL3	A0A0P0UXL3_ORYSJ	Os01g0135600 protein	Os01g0135600 OSNPB_010135600	Oryza sativa subsp. japonica (Rice)				TADDPLHPR	0.97563	-4.5014	0	0	0	0	0	0	0	0	0	0	9.81031	0	0	0	0	0	0	0	0	0	0	0	0	0	0	0	0
A0A0P0UXL4	A0A0P0UXL4_ORYSJ	Os01g0125850 protein	Os01g0125850 OSNPB_010125850	Oryza sativa subsp. japonica (Rice)				SSTRPERGR	0.96951	-2.4684	0	0	11.0833	0	0	0	0	0	0	0	0	0	0	0	0	0	0	0	0	0	0	0	0	0	0	0	0
A0A0P0UXL5	A0A0P0UXL5_ORYSJ	Peptidyl-prolyl cis-trans isomerase (PPIase) (EC 5.2.1.8)	Os01g0111100	Oryza sativa subsp. japonica (Rice)	protein peptidyl-prolyl isomerization [GO:0000413]		peptidyl-prolyl cis-trans isomerase activity [GO:0003755]	LIGDKRAVVAER	0.98652	-9.4717	0	0	0	0	0	0	0	0	0	0	0	0	0	0	0	0	0	0	0	13.1197	0	0	0	0	0	0	0
A0A0P0UXN8	A0A0P0UXN8_ORYSJ	RING-type E3 ubiquitin transferase (EC 2.3.2.27)	Os01g0121950 OSNPB_010121950	Oryza sativa subsp. japonica (Rice)	ubiquitin-dependent protein catabolic process [GO:0006511]	cytoplasm [GO:0005737]	ubiquitin protein ligase activity [GO:0061630]; zinc ion binding [GO:0008270]	AAAATPKFTTTR	0.98661	-9.4717	0	0	0	0	0	0	0	0	0	0	0	0	0	0	0	0	0	0	0	0	0	0	0	0	0	0	0
A0A0P0UXQ8	A0A0P0UXQ8_ORYSJ	Os01g0122701 protein	Os01g0122701 OSNPB_010122701	Oryza sativa subsp. japonica (Rice)				MLHGEHK	0.96852	-2.0335	0	0	0	0	0	0	0	0	0	0	0	0	0	0	0	0	0	0	0	10.2093	0	11.0188	0	0	13.3794	0	0
A0A0P0UXQ9	A0A0P0UXQ9_ORYSJ	Os01g0136900 protein	Os01g0136900 OSNPB_010136900	Oryza sativa subsp. japonica (Rice)	protein phosphorylation [GO:0006468]	membrane [GO:0016020]	ATP binding [GO:0005524]; polysaccharide binding [GO:0030247]; protein serine/threonine kinase activity [GO:0004674]	LQNGRMVAVK	0.98025	-6.8113	0	0	0	0	0	0	0	0	0	0	0	0	0	0	0	0	0	0	0	0	0	0	0	0	0	0	0
A0A0P0UXV4	A0A0P0UXV4_ORYSJ	Os01g0113833 protein	Os01g0113833 OSNPB_010113833	Oryza sativa subsp. japonica (Rice)				VSLPAERIHR	0.97881	-6.8113	0	16.5507	0	0	0	0	0	0	0	0	0	0	0	0	0	0	0	0	0	0	0	0	0	12.419	0	0	0
A0A0P0UXX1	A0A0P0UXX1_ORYSJ	Os01g0115700 protein	Os01g0115700 OSNPB_010115700	Oryza sativa subsp. japonica (Rice)	protein phosphorylation [GO:0006468]	membrane [GO:0016020]	ATP binding [GO:0005524]; polysaccharide binding [GO:0030247]; protein kinase activity [GO:0004672]	IHHVNVVR	0.97528	-24.275	0	0	0	0	0	0	0	0	0	0	0	0	11.4226	0	0	0	0	0	0	12.4412	0	0	12.1567	0	0	0	0
A0A0P0UXX6	A0A0P0UXX6_ORYSJ	Os01g0136850 protein	Os01g0136850 OSNPB_010136850	Oryza sativa subsp. japonica (Rice)				GHVRGVR	0.97365	-4.9373	0	0	10.1881	0	0	0	0	0	0	0	0	0	0	0	0	0	0	0	14.074	0	0	0	0	0	12.5214	0	0
A0A0P0UXY9	A0A0P0UXY9_ORYSJ	Os01g0111400 protein	Os01g0111400 OSNPB_010111400	Oryza sativa subsp. japonica (Rice)			DNA binding [GO:0003677]; metal ion binding [GO:0046872]	IIIKDGLENVRPVLSKIR	0.9761	-3.3919	0	0	0	0	0	0	0	0	0	0	0	0	0	0	0	0	0	0	0	0	0	0	0	0	0	0	0
A0A0P0UY29	A0A0P0UY29_ORYSJ	Os01g0151200 protein	Os01g0151200 OSNPB_010151200	Oryza sativa subsp. japonica (Rice)		membrane [GO:0016020]		FKQLKEEESK	0.97678	-6.8113	0	0	0	0	0	0	0	0	0	0	0	0	0	0	0	0	0	0	0	0	0	0	0	0	0	0	0
A0A0P0UY38	A0A0P0UY38_ORYSJ	Os01g0121800 protein	Os01g0121800 OSNPB_010121800	Oryza sativa subsp. japonica (Rice)		membrane [GO:0016020]	glucuronosyltransferase activity [GO:0015020]	HRPVPGAWCTGRKR	0.98784	-10.086	0	0	0	0	0	0	0	0	0	0	0	0	12.041	0	0	0	0	0	0	0	0	0	0	0	0	0	0
A0A0P0UY56	A0A0P0UY56_ORYSJ	Os01g0149200 protein	Os01g0149200 OSNPB_010149200	Oryza sativa subsp. japonica (Rice)				DFASHFNRR	0.97683	-2.4684	0	0	0	0	0	0	9.45403	0	0	0	0	0	0	0	0	0	0	0	0	0	0	0	0	0	0	0	0
A0A0P0UY67	A0A0P0UY67_ORYSJ	Os01g0133650 protein	Os01g0133650 OSNPB_010133650	Oryza sativa subsp. japonica (Rice)				QQPPLRLYQVR	0.9784	-6.3608	0	0	0	0	0	0	0	16.1161	0	0	0	0	0	0	0	0	0	0	0	0	0	0	0	0	0	0	0
A0A0P0UYB0	A0A0P0UYB0_ORYSJ	Os01g0159250 protein	Os01g0159250 OSNPB_010159250	Oryza sativa subsp. japonica (Rice)				VELPGLGEHPRDVR	0.98533	-11.787	0	0	12.6688	0	0	0	0	0	0	0	0	0	0	0	0	0	0	0	0	0	0	0	0	0	0	0	0
A0A0P0UYE2	A0A0P0UYE2_ORYSJ	Os01g0153275 protein	Os01g0153275 OSNPB_010153275	Oryza sativa subsp. japonica (Rice)				MTTTRRTAR	0.9697	-2.4684	0	0	0	0	0	0	0	0	0	0	0	0	0	0	0	0	0	0	0	0	0	0	0	0	0	0	0
A0A0P0UYE9	A0A0P0UYE9_ORYSJ	Os01g0157400 protein	Os01g0157400 OsJ_00445 OSNPB_010157400	Oryza sativa subsp. japonica (Rice)				ARACAYNPRK	0.97957	-6.8113	0	0	0	0	0	0	0	0	0	0	0	0	0	0	0	0	0	0	0	0	0	8.64071	0	0	0	0	0
A0A0P0UYI7	A0A0P0UYI7_ORYSJ	O-fucosyltransferase family protein	Os01g0168600 OSNPB_010168600	Oryza sativa subsp. japonica (Rice)	fucose metabolic process [GO:0006004]	cytoplasm [GO:0005737]; membrane [GO:0016020]	transferase activity [GO:0016740]	KHKVIHFNK	0.96684	-1.3917	0	0	0	0	0	0	0	0	0	0	0	0	0	0	0	0	0	0	0	0	0	0	0	0	0	0	0
A0A0P0UYL8	A0A0P0UYL8_ORYSJ	Os01g0163701 protein	Os01g0163701 OSNPB_010163701	Oryza sativa subsp. japonica (Rice)				QQPKPHIARLAR	0.97685	-3.4818	0	0	0	0	0	0	11.9105	10.5919	12.3292	0	0	0	0	0	0	0	0	0	0	0	12.7903	0	0	0	12.4248	0	0
A0A0P0UYL9	A0A0P0UYL9_ORYSJ	Os01g0166200 protein	Os01g0166200 OSNPB_010166200	Oryza sativa subsp. japonica (Rice)				EAEAAPARRGSR	0.97386	-3.4819	0	0	0	0	0	0	0	0	0	0	0	0	0	0	0	0	0	0	0	0	10.735	0	0	0	0	0	0
A0A0P0UYN3	A0A0P0UYN3_ORYSJ	Os01g0167700 protein	Os01g0167700 OSNPB_010167700	Oryza sativa subsp. japonica (Rice)				IPPPKSNSVKK	0.98512	-8.0623	0	0	0	0	0	0	0	0	0	0	0	0	0	0	10.3968	0	0	0	0	0	0	0	0	0	0	0	0
A0A0P0UYN6	A0A0P0UYN6_ORYSJ	Os01g0153200 protein	Os01g0153200 OSNPB_010153200	Oryza sativa subsp. japonica (Rice)	translation [GO:0006412]	cytosolic small ribosomal subunit [GO:0022627]	structural constituent of ribosome [GO:0003735]	RIWFVDDHK	0.96846	-2.4684	0	0	0	0	11.0359	0	0	0	0	0	0	0	0	0	0	0	0	0	0	0	0	0	0	0	0	0	0
A0A0P0UYN8	A0A0P0UYN8_ORYSJ	Os01g0166000 protein	Os01g0166000 OsJ_00506 OSNPB_010166000 P0701D05.19	Oryza sativa subsp. japonica (Rice)				RALSGFLAS	0.96846	-2.4684	0	0	0	13.865	0	0	0	0	0	0	0	0	0	0	0	0	0	0	0	14.6547	0	0	0	0	0	0	0
A0A0P0UYP0	A0A0P0UYP0_ORYSJ	Os01g0162600 protein	Os01g0162600 OSNPB_010162600	Oryza sativa subsp. japonica (Rice)				SSAERGGGGR	0.97934	-6.8113	0	0	0	0	0	0	0	0	0	0	0	0	0	0	0	0	0	0	0	0	0	0	0	0	14.4387	0	0
A0A0P0UYP1	A0A0P0UYP1_ORYSJ	Os01g0148075 protein	Os01g0148075 OSNPB_010148075	Oryza sativa subsp. japonica (Rice)				HSRTACAA	0.98467	-1.7021	0	0	0	0	0	0	0	0	0	0	0	0	0	0	0	0	0	0	0	0	0	0	0	0	0	0	0
A0A0P0UYP3	A0A0P0UYP3_ORYSJ	Os01g0166300 protein	Os01g0166300 OSNPB_010166300	Oryza sativa subsp. japonica (Rice)				EELTMLVQGKR	0.98429	-8.0628	0	0	0	0	0	0	0	0	0	0	0	0	0	0	0	0	0	0	0	0	10.1466	0	9.61134	0	0	0	0
A0A0P0UYR2	A0A0P0UYR2_ORYSJ	Os01g0168500 protein	Os01g0168500 OJ1276_B06.19	Oryza sativa subsp. japonica (Rice)				FIKADLTPLRTSAP	0.98602	-11.787	0	0	0	0	0	0	0	0	0	0	0	0	0	0	0	0	0	0	0	0	0	0	0	0	0	0	0
A0A0P0UYV8	A0A0P0UYV8_ORYSJ	Os01g0173701 protein	Os01g0173701 OSNPB_010173701	Oryza sativa subsp. japonica (Rice)				SARRLFSLR	0.96832	-2.4684	0	0	0	0	0	0	0	0	0	0	0	0	0	0	0	0	0	13.0306	0	0	0	0	0	0	0	0	0
A0A0P0UYW4	A0A0P0UYW4_ORYSJ	Os01g0153625 protein	Os01g0153625 OSNPB_010153625	Oryza sativa subsp. japonica (Rice)				RHGGGVA	0.97309	-3.1818	0	0	0	0	0	0	0	0	9.60492	0	0	0	0	0	0	0	0	0	0	10.1596	0	0	0	0	0	0	0
A0A0P0UZ13	A0A0P0UZ13_ORYSJ	Os01g0175850 protein	Os01g0175850 OSNPB_010175850	Oryza sativa subsp. japonica (Rice)				AIWAMAARLER	0.9778	-18.551	0	0	0	13.5688	0	0	0	0	10.9199	0	10.3296	0	14.1582	0	0	10.5789	0	0	0	0	0	0	11.3737	0	0	0	0
A0A0P0UZ18	A0A0P0UZ18_ORYSJ	Os01g0186950 protein	Os01g0186950 OSNPB_010186950	Oryza sativa subsp. japonica (Rice)				MMLDQKK	0.98309	-10.701	0	0	0	14.4799	0	0	0	0	0	0	0	0	0	0	0	0	0	0	0	0	0	11.9657	0	0	0	0	0
A0A0P0UZ30	A0A0P0UZ30_ORYSJ	Malic enzyme	Os01g0188400 OSNPB_010188400	Oryza sativa subsp. japonica (Rice)	malate metabolic process [GO:0006108]		malate dehydrogenase (decarboxylating) (NAD+) activity [GO:0004471]; metal ion binding [GO:0046872]; NAD binding [GO:0051287]	YIGLRQRR	0.98546	-1.7021	0	13.2405	0	0	0	0	0	0	0	0	12.4343	0	0	0	0	0	13.1276	0	0	0	0	0	0	0	0	0	0
A0A0P0UZ41	A0A0P0UZ41_ORYSJ	Os01g0166700 protein	Os01g0166700 OsJ_00511 P0701D05.24	Oryza sativa subsp. japonica (Rice)	sphingolipid metabolic process [GO:0006665]	lysosome [GO:0005764]	aspartic-type endopeptidase activity [GO:0004190]	KMVLEYTPLILVK	0.98244	-10.985	0	0	0	0	0	9.84081	0	0	0	0	0	0	0	0	0	0	0	0	0	0	0	0	0	0	0	0	0
A0A0P0UZ45	A0A0P0UZ45_ORYSJ	Os01g0182200 protein	Os01g0182200 OSNPB_010182200	Oryza sativa subsp. japonica (Rice)		membrane [GO:0016020]	water channel activity [GO:0015250]	AVFPPPAPKPKAKK	0.98514	-11.787	0	0	0	0	0	0	0	0	0	0	0	0	0	0	0	0	0	0	0	0	0	0	0	0	0	0	0
A0A0P0UZ70	A0A0P0UZ70_ORYSJ	Os01g0193700 protein	Os01g0193700 OSNPB_010193700	Oryza sativa subsp. japonica (Rice)		membrane [GO:0016020]		ELHLVPVPK	0.96818	-2.8375	0	0	0	0	0	0	13.3311	0	0	0	0	0	0	0	0	0	0	0	0	0	0	0	0	0	0	0	0
A0A0P0UZ73	A0A0P0UZ73_ORYSJ	Os01g0193800 protein	Os01g0193800 OSNPB_010193800	Oryza sativa subsp. japonica (Rice)				GPPHVAPLPQVTVR	0.9876	-10.086	0	0	0	0	0	0	0	0	0	0	0	0	0	0	0	0	0	0	0	0	0	0	0	0	0	0	0
A0A0P0UZ75	A0A0P0UZ75_ORYSJ	Os01g0176050 protein	Os01g0176050 OSNPB_010176050	Oryza sativa subsp. japonica (Rice)				HHRDQHEVRR	0.97101	-5.1097	0	0	0	0	0	13.1526	0	0	0	0	13.712	0	0	9.53201	13.1942	0	0	0	0	0	0	0	0	0	0	0	0
A0A0P0UZA7	A0A0P0UZA7_ORYSJ	Os01g0180300 protein	Os01g0180300 OSNPB_010180300	Oryza sativa subsp. japonica (Rice)				AMLENEVAAVK	0.98468	-13.076	0	0	0	0	0	0	0	0	0	0	0	0	0	0	0	0	11.6382	0	0	0	0	0	0	0	11.8422	0	0
A0A0P0UZF8	A0A0P0UZF8_ORYSJ	Os01g0170600 protein	Os01g0170600 OSNPB_010170600	Oryza sativa subsp. japonica (Rice)				ALPFLVGR	0.97534	-3.735	0	0	0	0	0	0	0	0	0	0	0	11.1363	0	0	0	0	11.4601	11.3204	0	0	0	0	0	0	0	0	0
A0A0P0UZG7	A0A0P0UZG7_ORYSJ	Protein SCAR (Protein WAVE)	Os01g0208600 OSNPB_010208600	Oryza sativa subsp. japonica (Rice)	actin cytoskeleton organization [GO:0030036]	cytoplasm [GO:0005737]; cytoskeleton [GO:0005856]	actin binding [GO:0003779]	EELLQQIRSK	0.97718	-20.718	0	0	0	0	0	0	0	0	0	0	0	0	0	0	0	0	0	0	0	0	0	0	0	0	0	0	0
A0A0P0UZG8	A0A0P0UZG8_ORYSJ	Os01g0199400 protein	Os01g0199400 OSNPB_010199400	Oryza sativa subsp. japonica (Rice)		membrane [GO:0016020]		LEGIILTSPALR	0.98542	-11.505	0	0	0	0	11.5371	0	0	0	0	0	0	0	0	0	0	0	0	0	0	0	0	0	0	11.5304	0	0	0
A0A0P0UZM5	A0A0P0UZM5_ORYSJ	Os01g0209500 protein	Os01g0209500 OSNPB_010209500	Oryza sativa subsp. japonica (Rice)	protein ubiquitination [GO:0016567]	CCR4-NOT complex [GO:0030014]	ubiquitin-protein transferase activity [GO:0004842]	NKPSLKSR	0.9852	-1.7021	12.513	0	0	0	0	0	0	0	0	0	0	0	0	0	0	0	0	0	0	0	0	0	0	0	0	0	12.2611
A0A0P0UZP2	A0A0P0UZP2_ORYSJ	Os01g0218800 protein	Os01g0218800 OSNPB_010218800	Oryza sativa subsp. japonica (Rice)		nucleus [GO:0005634]	histone lysine N-methyltransferase activity [GO:0018024]; metal ion binding [GO:0046872]	DVQDFTNWVCR	0.98423	-12.564	0	0	0	0	0	0	0	0	0	0	0	0	0	0	0	0	0	0	0	0	0	0	0	0	0	0	0
A0A0P0UZP5	A0A0P0UZP5_ORYSJ	Os01g0213350 protein	Os01g0213350 OSNPB_010213350	Oryza sativa subsp. japonica (Rice)				KTLPMYVWLFMVFEN	0.98389	-12.402	0	0	0	0	0	0	0	0	0	0	9.22944	0	0	0	0	0	0	0	0	0	0	0	0	0	0	0	0
A0A0P0UZP7	1A15_ORYSJ	1-aminocyclopropane-1-carboxylate synthase 5 (ACC synthase 5) (OsACS5) (EC 4.4.1.14)	ACS5 ACC5 Os01g0192900 LOC_Os01g09700 P0671B11.29	Oryza sativa subsp. japonica (Rice)	amino acid metabolic process [GO:0006520]; ethylene biosynthetic process [GO:0009693]		lyase activity [GO:0016829]; pyridoxal phosphate binding [GO:0030170]; transaminase activity [GO:0008483]	VHIVYSLSK	0.97552	-4.5014	0	0	0	0	0	0	0	0	0	14.4347	0	0	0	0	0	0	0	0	0	0	0	0	0	0	0	0	0
A0A0P0UZP8	A0A0P0UZP8_ORYSJ	Os01g0180800 protein	Os01g0180800 OSNPB_010180800	Oryza sativa subsp. japonica (Rice)			ATP binding [GO:0005524]; ATP-dependent protein folding chaperone [GO:0140662]	KYSDPELQR	0.97587	-25.627	0	0	0	8.73688	0	0	0	0	0	0	0	0	0	0	0	0	0	10.9695	0	0	0	0	0	0	0	0	0
A0A0P0UZQ6	A0A0P0UZQ6_ORYSJ	Os01g0195967 protein	Os01g0195967 OSNPB_010195967	Oryza sativa subsp. japonica (Rice)			protein dimerization activity [GO:0046983]	TSSILIGAREYVK	0.98261	-10.985	0	0	0	0	0	0	0	0	0	0	0	0	0	0	0	0	0	0	0	13.9877	0	0	0	0	0	0	0
A0A0P0UZT0	A0A0P0UZT0_ORYSJ	Os01g0198702 protein	Os01g0198702 OSNPB_010198702	Oryza sativa subsp. japonica (Rice)				WVPHVFFK	0.97502	-3.735	0	0	0	0	0	0	0	0	0	0	0	0	0	0	0	0	0	0	0	0	0	0	0	0	0	0	0
A0A0P0UZV9	A0A0P0UZV9_ORYSJ	Os01g0219200 protein	Os01g0219200	Oryza sativa subsp. japonica (Rice)				MMELRKRPRPR	0.98429	-12.564	0	0	0	0	0	12.2113	0	0	0	0	0	0	0	0	0	0	0	0	0	0	0	0	0	0	0	0	0
A0A0P0V004	A0A0P0V004_ORYSJ	Os01g0232625 protein	Os01g0232625 OSNPB_010232625	Oryza sativa subsp. japonica (Rice)				KLISSSPLPGGRRPER	0.98219	-10.686	0	0	0	0	0	0	0	0	0	0	0	0	0	0	0	0	0	0	0	0	0	0	0	0	0	0	0
A0A0P0V022	A0A0P0V022_ORYSJ	Os01g0235100 protein	Os01g0235100 OSNPB_010235100	Oryza sativa subsp. japonica (Rice)				KHPQAAR	1.1006	-0.00052908	0	0	0	9.84613	0	0	0	0	0	0	0	0	0	0	0	0	0	0	0	0	0	0	0	0	0	0	0
A0A0P0V031	A0A0P0V031_ORYSJ	Os01g0212700 protein	Os01g0212700 OSNPB_010212700	Oryza sativa subsp. japonica (Rice)		membrane [GO:0016020]		TMNTPNSWLFADNSK	0.98324	-10.701	0	0	0	0	0	0	0	0	0	0	0	0	0	0	0	0	0	0	0	0	0	0	0	0	0	0	0
A0A0P0V063	A0A0P0V063_ORYSJ	Os01g0233850 protein	Os01g0233850 OSNPB_010233850	Oryza sativa subsp. japonica (Rice)				AAVGEPER	0.97623	-3.735	0	0	8.34221	0	0	0	0	0	0	0	0	0	0	0	0	0	0	0	0	0	0	0	0	0	0	0	0
A0A0P0V069	A0A0P0V069_ORYSJ	Os01g0218150 protein	Os01g0218150 OSNPB_010218150	Oryza sativa subsp. japonica (Rice)				THRGKQGR	0.98292	-1.7021	0	0	0	0	0	0	0	0	0	0	0	0	0	0	0	0	0	0	0	0	0	0	0	0	0	0	0
A0A0P0V087	A0A0P0V087_ORYSJ	Os01g0231600 protein	Os01g0231600 OSNPB_010231600	Oryza sativa subsp. japonica (Rice)				MNSNLQVIIK	0.98695	-8.8442	0	0	0	0	0	0	0	0	0	0	0	0	8.73281	0	0	0	0	0	0	0	0	0	0	0	0	0	0
A0A0P0V089	A0A0P0V089_ORYSJ	Os01g0233100 protein	Os01g0233100 OSNPB_010233100	Oryza sativa subsp. japonica (Rice)	cell cycle [GO:0007049]; cell division [GO:0051301]			DVEETKWNK	0.9766	-4.142	0	0	0	0	0	0	0	0	0	0	0	0	0	0	0	0	0	0	0	0	0	0	0	0	0	0	0
A0A0P0V0B2	A0A0P0V0B2_ORYSJ	Os01g0243901 protein	Os01g0243901 OSNPB_010243901	Oryza sativa subsp. japonica (Rice)				APAGGDK	0.9401	-0.00052908	0	0	0	0	0	0	0	0	0	0	0	0	0	0	0	0	0	0	0	9.16075	0	0	0	0	0	0	0
A0A0P0V0B3	A0A0P0V0B3_ORYSJ	3-methyl-2-oxobutanoate hydroxymethyltransferase (EC 2.1.2.11)	Os01g0225400 OSNPB_010225400	Oryza sativa subsp. japonica (Rice)	pantothenate biosynthetic process [GO:0015940]		3-methyl-2-oxobutanoate hydroxymethyltransferase activity [GO:0003864]	IAAADVDGFANALQK	0.96873	-2.6001	0	0	0	0	0	0	0	0	0	0	0	0	0	0	0	0	0	0	0	0	0	9.45094	0	0	0	0	0
A0A0P0V0B4	A0A0P0V0B4_ORYSJ	Os01g0237750 protein	Os01g0237750 OSNPB_010237750	Oryza sativa subsp. japonica (Rice)				QADVVISAVGHR	0.9848	-11.505	0	0	0	0	0	0	0	0	0	0	0	0	0	0	0	0	0	0	0	0	0	0	0	0	0	0	0
A0A0P0V0B5	A0A0P0V0B5_ORYSJ	Os01g0225550 protein	Os01g0225550 OSNPB_010225550	Oryza sativa subsp. japonica (Rice)				HEPLRLVHQLR	0.97086	-2.5454	16.6204	0	0	0	0	0	0	9.30551	0	0	15.8584	8.9292	8.93752	0	9.01901	0	0	0	0	0	0	0	0	0	0	0	0
A0A0P0V0B8	A0A0P0V0B8_ORYSJ	Os01g0216500 protein	Os01g0216500 OSNPB_010216500	Oryza sativa subsp. japonica (Rice)			hydrolase activity, acting on ester bonds [GO:0016788]	VVGAISAGIEAVIK	0.98361	-13.82	0	10.9549	0	0	0	0	0	0	12.2102	0	0	0	0	0	0	0	0	0	0	0	0	0	0	0	13.0935	0	0
A0A0P0V0C8	A0A0P0V0C8_ORYSJ	Os01g0227350 protein	Os01g0227350 OSNPB_010227350	Oryza sativa subsp. japonica (Rice)				DDTLQQAVELRR	0.97741	-21.393	0	0	11.0778	0	0	0	0	0	0	0	0	0	0	0	0	0	0	0	0	0	0	13.6546	0	0	0	0	0
A0A0P0V0F1	A0A0P0V0F1_ORYSJ	Os01g0239700 protein	Os01g0239700 OSNPB_010239700	Oryza sativa subsp. japonica (Rice)	protein phosphorylation [GO:0006468]		ATP binding [GO:0005524]; protein serine/threonine kinase activity [GO:0004674]	AVLSNGEVVAVK	0.97738	-19.567	0	0	0	0	0	0	0	0	0	0	0	0	0	0	0	0	10.2055	0	0	0	0	0	0	10.799	0	0	0
A0A0P0V0G5	A0A0P0V0G5_ORYSJ	Os01g0246200 protein	Os01g0246200 OSNPB_010246200	Oryza sativa subsp. japonica (Rice)				RRGEHGGGGGEPR	0.98277	-10.985	0	0	0	0	0	0	0	0	0	0	0	0	0	0	0	0	0	0	0	0	0	0	0	0	0	0	0
A0A0P0V0H8	A0A0P0V0H8_ORYSJ	Os01g0227600 protein	Os01g0227600 OSNPB_010227600	Oryza sativa subsp. japonica (Rice)				RWRPGVGR	0.98569	-1.7021	0	0	0	0	0	0	0	0	0	0	0	0	0	0	0	14.7082	0	0	0	0	0	0	0	0	0	0	0
A0A0P0V0K9	A0A0P0V0K9_ORYSJ	Os01g0260500 protein	Os01g0260500 OSNPB_010260500	Oryza sativa subsp. japonica (Rice)	defense response [GO:0006952]; response to other organism [GO:0051707]		ADP binding [GO:0043531]; ATP binding [GO:0005524]	FLRVLDLR	0.98569	-1.7021	0	0	0	0	0	0	0	0	0	0	0	0	0	0	0	0	0	0	0	0	0	0	0	0	0	0	0
A0A0P0V0M3	A0A0P0V0M3_ORYSJ	Os01g0249050 protein	Os01g0249050 OSNPB_010249050	Oryza sativa subsp. japonica (Rice)				GVAGDEVARAAR	0.98787	-9.4717	0	0	0	0	0	0	0	0	0	0	0	0	0	0	0	0	0	0	0	0	0	10.899	0	0	0	0	0
A0A0P0V0M7	A0A0P0V0M7_ORYSJ	histidinol dehydrogenase (EC 1.1.1.23)	Os01g0232700 OSNPB_010232700	Oryza sativa subsp. japonica (Rice)	histidine biosynthetic process [GO:0000105]		histidinol dehydrogenase activity [GO:0004399]; metal ion binding [GO:0046872]; NAD binding [GO:0051287]	MAEVEGLEAHR	0.97688	-6.3608	0	0	0	0	0	8.95222	0	0	0	0	0	0	0	0	0	0	0	0	0	0	0	0	0	0	0	0	0
A0A0P0V0P1	A0A0P0V0P1_ORYSJ	Os01g0234300 protein	Os01g0234300 OSNPB_010234300	Oryza sativa subsp. japonica (Rice)	cell wall modification [GO:0042545]; pectin catabolic process [GO:0045490]	membrane [GO:0016020]	aspartyl esterase activity [GO:0045330]; pectinesterase activity [GO:0030599]; pectinesterase inhibitor activity [GO:0046910]	IRDAIKAAPEHSR	0.98576	-9.2834	0	0	0	0	0	0	0	0	0	0	0	0	0	0	0	0	0	0	0	0	0	0	0	0	0	0	0
A0A0P0V0R5	A0A0P0V0R5_ORYSJ	Os01g0267100 protein	Os01g0267100	Oryza sativa subsp. japonica (Rice)	macromolecule methylation [GO:0043414]; RNA metabolic process [GO:0016070]	nucleus [GO:0005634]	methyltransferase activity [GO:0008168]; nucleic acid binding [GO:0003676]	MFLQLADYHLR	0.9821	-15.631	0	0	0	0	0	0	0	0	0	0	0	0	0	8.66772	0	0	0	0	0	0	0	0	0	0	0	0	9.44097
A0A0P0V0R7	A0A0P0V0R7_ORYSJ	Os01g0237200 protein	Os01g0237200 OSNPB_010237200	Oryza sativa subsp. japonica (Rice)				INVDLDGRIKDCK	0.98576	-9.2834	0	0	0	0	0	0	0	0	0	0	0	0	0	0	0	0	0	0	0	0	0	0	0	14.1644	0	0	0
A0A0P0V0R8	A0A0P0V0R8_ORYSJ	Os01g0227900 protein	Os01g0227900 OSNPB_010227900	Oryza sativa subsp. japonica (Rice)				ELRTWYEER	0.98549	-0.76684	0	0	0	0	0	0	0	0	0	0	0	0	0	0	0	0	0	0	0	0	0	0	0	0	0	0	0
A0A0P0V0S6	A0A0P0V0S6_ORYSJ	Os01g0261200 protein	Os01g0261200 OSNPB_010261200	Oryza sativa subsp. japonica (Rice)		membrane [GO:0016020]		SDAGKPSTELSSNRGFLR	0.98216	-10.393	0	0	0	0	0	0	0	0	0	0	0	0	0	0	0	0	0	0	0	0	0	0	0	0	0	0	0
A0A0P0V0W3	A0A0P0V0W3_ORYSJ	Os01g0267000 protein	Os01g0267000 OSNPB_010267000	Oryza sativa subsp. japonica (Rice)				RGPLVNR	0.9457	-0.00052908	0	0	0	0	0	0	0	0	0	0	0	0	0	0	0	0	0	0	0	0	0	0	0	0	0	0	0
A0A0P0V0X5	A0A0P0V0X5_ORYSJ	Os01g0244150 protein	Os01g0244150 OSNPB_010244150	Oryza sativa subsp. japonica (Rice)				ELRFVPLPVGR	0.97524	-4.219	10.6595	0	0	0	0	0	0	0	0	0	0	0	0	0	0	11.5083	9.55447	12.4902	0	0	0	0	12.4687	0	0	0	13.2574
A0A0P0V0Y3	A0A0P0V0Y3_ORYSJ	Os01g0253050 protein	Os01g0253050 OSNPB_010253050	Oryza sativa subsp. japonica (Rice)				EREETNR	0.97834	-0.47585	0	0	0	0	0	0	0	0	0	0	0	0	0	0	0	0	0	0	0	0	9.95475	0	0	0	0	0	0
A0A0P0V104	A0A0P0V104_ORYSJ	Os01g0275800 protein	Os01g0275800 OSNPB_010275800	Oryza sativa subsp. japonica (Rice)				LRKWAAQSR	0.96974	-2.4684	0	0	0	0	0	0	0	0	0	0	0	0	0	0	0	0	0	0	12.4433	0	0	0	0	0	0	0	0
A0A0P0V142	A0A0P0V142_ORYSJ	Os01g0275200 protein	Os01g0275200 OSNPB_010275200	Oryza sativa subsp. japonica (Rice)	RNA-mediated post-transcriptional gene silencing [GO:0035194]	cytoplasm [GO:0005737]	endoribonuclease activity [GO:0004521]; RNA binding [GO:0003723]	NCDIYGPWKRMCLVK	0.97938	-17.436	11.0201	0	0	11.0647	0	0	0	0	0	0	0	0	10.8273	0	0	11.4797	0	0	11.7417	0	0	0	0	0	0	0	11.2574
A0A0P0V144	A0A0P0V144_ORYSJ	Os01g0283500 protein	Os01g0283500 OSNPB_010283500	Oryza sativa subsp. japonica (Rice)				RPSFYGGGGGGGVGRPR	0.98128	-10.57	0	0	0	0	0	0	0	0	0	0	0	0	0	0	0	0	0	0	0	0	0	0	0	0	0	0	0
A0A0P0V147	A0A0P0V147_ORYSJ	Os01g0285900 protein	Os01g0285900 OSNPB_010285900	Oryza sativa subsp. japonica (Rice)				QPPPRRQPVHQ	0.97998	-8.0623	0	0	0	0	0	0	0	0	0	0	0	0	0	0	0	0	0	0	0	0	0	0	0	0	0	0	0
A0A0P0V155	A0A0P0V155_ORYSJ	Pyruvate kinase (EC 2.7.1.40)	Os01g0276700 OSNPB_010276700	Oryza sativa subsp. japonica (Rice)			ATP binding [GO:0005524]; kinase activity [GO:0016301]; magnesium ion binding [GO:0000287]; potassium ion binding [GO:0030955]; pyruvate kinase activity [GO:0004743]	VNLPGVIVDLPTLTEK	0.97371	-2.1119	0	0	0	0	0	0	0	0	0	0	0	9.82142	0	0	0	0	0	0	0	0	0	0	0	0	0	0	0
A0A0P0V182	A0A0P0V182_ORYSJ	Os01g0287400 protein	Os01g0287400 OSNPB_010287400	Oryza sativa subsp. japonica (Rice)				YRRSFLWK	0.98468	-1.7021	11.8515	0	0	0	0	0	0	0	0	0	0	0	0	0	0	0	0	0	0	0	0	0	0	0	0	0	0
A0A0P0V185	A0A0P0V185_ORYSJ	Os01g0294100 protein	Os01g0294100 OSNPB_010294100	Oryza sativa subsp. japonica (Rice)				SLARSPHPANRAEPPK	0.98166	-10.686	0	0	10.3851	0	0	0	0	0	0	0	0	0	0	0	0	0	0	0	0	0	0	0	0	0	0	0	0
A0A0P0V190	A0A0P0V190_ORYSJ	Os01g0293200 protein	Os01g0293200 OsJ_01401 OSNPB_010293200 P0706B05.45	Oryza sativa subsp. japonica (Rice)			RNA binding [GO:0003723]	DAALDAAILRDRR	0.97687	-23.19	0	0	0	0	0	0	0	0	0	0	0	0	0	0	0	0	0	0	0	0	0	0	0	0	0	0	0
A0A0P0V196	A0A0P0V196_ORYSJ	Os01g0297200 protein	Os01g0297200	Oryza sativa subsp. japonica (Rice)	response to stress [GO:0006950]	membrane [GO:0016020]	ATP binding [GO:0005524]; ATP hydrolysis activity [GO:0016887]	GAALWWTSVVR	0.97527	-24.226	0	0	15.5191	0	0	0	0	0	0	0	0	0	0	0	0	0	0	0	0	0	0	0	10.6447	0	0	9.33123	0
A0A0P0V1C9	A0A0P0V1C9_ORYSJ	Os01g0299150 protein	Os01g0299150 OSNPB_010299150	Oryza sativa subsp. japonica (Rice)	RNA modification [GO:0009451]	intracellular membrane-bounded organelle [GO:0043231]	RNA binding [GO:0003723]	VWISPTLR	0.97592	-3.735	0	0	9.03111	0	0	0	0	0	0	0	0	0	0	8.92973	0	0	0	0	0	0	0	0	0	0	0	0	0
A0A0P0V1D7	A0A0P0V1D7_ORYSJ	Os01g0290000 protein	Os01g0290000 OSNPB_010290000	Oryza sativa subsp. japonica (Rice)	lipid metabolic process [GO:0006629]; proteolysis [GO:0006508]		aspartic-type endopeptidase activity [GO:0004190]	SVRNNIESVVDK	0.9878	-9.4717	0	0	0	0	0	0	0	0	0	0	0	0	0	0	0	0	0	9.026	0	0	0	0	0	0	0	0	0
A0A0P0V1K1	A0A0P0V1K1_ORYSJ	DNA topoisomerase 2 (EC 5.6.2.2)	Os01g0268300 OSNPB_010268300	Oryza sativa subsp. japonica (Rice)	DNA topological change [GO:0006265]		ATP binding [GO:0005524]; DNA binding [GO:0003677]; DNA topoisomerase type II (double strand cut, ATP-hydrolyzing) activity [GO:0003918]	RMLKQLK	0.97858	-7.465	0	0	0	0	0	0	0	0	0	0	0	10.2908	0	0	0	0	0	0	0	0	0	0	0	0	0	10.8585	0
A0A0P0V1M6	A0A0P0V1M6_ORYSJ	Os01g0308300 protein	Os01g0308300	Oryza sativa subsp. japonica (Rice)	defense response [GO:0006952]; response to other organism [GO:0051707]		ADP binding [GO:0043531]; ATP binding [GO:0005524]	EVDESIVLII	0.97701	-21.119	0	0	0	11.4997	0	0	0	0	0	0	0	0	0	0	0	0	0	0	0	0	0	0	0	0	0	0	0
A0A0P0V1N3	A0A0P0V1N3_ORYSJ	Os01g0278683 protein	Os01g0278683 OSNPB_010278683	Oryza sativa subsp. japonica (Rice)				LAAWEHAN	0.97525	-3.735	0	0	0	0	0	0	0	0	0	0	0	0	0	0	0	0	0	0	0	0	0	0	0	0	0	0	0
A0A0P0V1N4	A0A0P0V1N4_ORYSJ	Os01g0316600 protein	Os01g0316600 OSNPB_010316600	Oryza sativa subsp. japonica (Rice)			RNA binding [GO:0003723]	YGRILDIDLK	0.98048	-6.8113	0	0	0	9.85964	0	0	0	0	0	0	0	0	0	0	0	0	0	0	0	0	0	11.0276	0	0	0	0	10.5004
A0A0P0V1P0	A0A0P0V1P0_ORYSJ	Os01g0279200 protein	Os01g0279200 OSNPB_010279200	Oryza sativa subsp. japonica (Rice)				ILKELHKSCQR	0.98505	-8.0623	0	0	0	0	0	0	0	9.23161	0	0	0	8.80242	0	0	0	0	0	0	0	0	0	0	0	0	0	0	0
A0A0P0V1Q2	A0A0P0V1Q2_ORYSJ	Os01g0296000 protein	Os01g0296000	Oryza sativa subsp. japonica (Rice)	protein phosphorylation [GO:0006468]		ATP binding [GO:0005524]; protein kinase activity [GO:0004672]	EIEATMQIRHK	0.97415	-3.1204	0	0	0	0	0	0	0	0	0	0	9.37125	0	0	0	0	0	0	0	0	0	0	0	0	0	0	0	0
A0A0P0V1S4	A0A0P0V1S4_ORYSJ	Os01g0289950 protein	Os01g0289950 OSNPB_010289950	Oryza sativa subsp. japonica (Rice)				GVATFASTNSR	0.98225	-10.095	0	0	0	0	0	0	0	0	0	0	0	0	0	0	0	0	0	0	0	0	0	0	0	0	0	9.57546	0
A0A0P0V1T6	A0A0P0V1T6_ORYSJ	Os01g0314700 protein	Os01g0314700 OSNPB_010314700	Oryza sativa subsp. japonica (Rice)				EFWFRYK	0.97669	-22.332	0	0	11.3175	0	0	0	0	0	0	0	0	0	0	0	0	0	0	0	0	0	0	0	0	0	0	0	0
A0A0P0V1T7	A0A0P0V1T7_ORYSJ	Os01g0318202 protein	Os01g0318202 OSNPB_010318202	Oryza sativa subsp. japonica (Rice)		membrane [GO:0016020]		GGVLHPKGRGR	0.98067	-8.0623	0	0	0	0	0	0	0	0	0	0	0	0	0	0	0	0	0	0	11.8305	0	0	0	0	0	0	0	0
A0A0P0V1V0	A0A0P0V1V0_ORYSJ	Os01g0289741 protein	Os01g0289741 OSNPB_010289741	Oryza sativa subsp. japonica (Rice)				GGQGQGRAERR	0.98062	-8.0623	0	0	0	0	0	0	0	0	0	0	0	0	0	0	0	0	0	0	0	0	0	0	0	0	0	0	0
A0A0P0V1V9	A0A0P0V1V9_ORYSJ	Os01g0325875 protein	Os01g0325875 OSNPB_010325875	Oryza sativa subsp. japonica (Rice)				MLGGYDKR	0.9852	-1.7021	0	0	0	0	0	0	0	0	0	0	0	0	0	0	0	0	0	0	0	0	0	0	0	0	0	0	0
A0A0P0V1X1	A0A0P0V1X1_ORYSJ	Os01g0335500 protein	Os01g0335500 OSNPB_010335500	Oryza sativa subsp. japonica (Rice)				KTKVKPMVTSFKPSK	0.98442	-13.246	0	0	0	0	0	16.1821	16.5727	0	0	0	0	0	0	0	0	0	0	0	0	0	0	0	0	0	0	0	0
A0A0P0V1Y2	A0A0P0V1Y2_ORYSJ	Os01g0329800 protein	Os01g0329800 OSNPB_010329800	Oryza sativa subsp. japonica (Rice)				VVKTGTK	1.0334	-0.00052908	0	0	0	8.3903	0	0	0	0	0	0	0	8.74883	0	8.55834	8.6207	0	0	0	0	0	0	0	0	0	0	0	0
A0A0P0V222	A0A0P0V222_ORYSJ	Os01g0336100 protein	Os01g0336100 OSNPB_010336100	Oryza sativa subsp. japonica (Rice)				LEDLRKR	0.9419	-0.00052908	0	0	0	0	0	0	0	0	0	0	0	0	0	12.4212	0	0	0	0	0	0	0	0	0	0	0	0	0
A0A0P0V233	A0A0P0V233_ORYSJ	Os01g0343350 protein	Os01g0343350 OSNPB_010343350	Oryza sativa subsp. japonica (Rice)		membrane [GO:0016020]		SSPRSCLLFFR	0.97132	-3.1203	0	0	0	0	0	0	0	0	0	0	0	8.98433	0	0	0	0	0	0	0	0	0	0	0	0	0	0	0
A0A0P0V279	A0A0P0V279_ORYSJ	Os01g0349600 protein	Os01g0349600 OSNPB_010349600	Oryza sativa subsp. japonica (Rice)				AWIYAVPLPTTRR	0.98462	-9.2834	0	0	0	0	0	0	0	0	0	0	0	0	0	0	0	0	0	0	0	0	9.24741	0	0	0	0	0	0
A0A0P0V288	A0A0P0V288_ORYSJ	Os01g0318900 protein	Os01g0318900 OSNPB_010318900	Oryza sativa subsp. japonica (Rice)				APLPPPRCERRPAR	0.98643	-10.086	0	0	0	0	0	0	0	0	0	0	0	0	0	0	0	0	0	0	0	0	0	11.0745	0	0	0	0	0
A0A0P0V289	A0A0P0V289_ORYSJ	Poly [ADP-ribose] polymerase (PARP) (EC 2.4.2.-)	Os01g0351100 OSNPB_010351100	Oryza sativa subsp. japonica (Rice)		nucleus [GO:0005634]	NAD+ ADP-ribosyltransferase activity [GO:0003950]; nucleotidyltransferase activity [GO:0016779]	GVGQTEPNIAESK	0.98546	-13.018	0	0	0	0	0	0	0	0	0	0	0	0	0	0	0	0	0	0	9.98271	0	0	0	0	0	0	0	0
A0A0P0V298	A0A0P0V298_ORYSJ	Os01g0337600 protein	Os01g0337600 OSNPB_010337600	Oryza sativa subsp. japonica (Rice)	protein dephosphorylation [GO:0006470]	nucleoplasm [GO:0005654]; protein phosphatase 4 complex [GO:0030289]	protein phosphatase activator activity [GO:0072542]	RQREQER	0.94013	-0.00052908	0	0	0	0	0	0	0	0	0	0	0	0	0	0	0	0	0	0	0	0	0	0	0	0	0	0	0
A0A0P0V2E8	A0A0P0V2E8_ORYSJ	Os01g0360175 protein	Os01g0360175 OSNPB_010360175	Oryza sativa subsp. japonica (Rice)	defense response [GO:0006952]; response to other organism [GO:0051707]		ADP binding [GO:0043531]; ATP binding [GO:0005524]	KMCKIHDLMHDIALHVMR	0.98598	-11.894	0	0	0	0	0	0	0	0	0	0	0	0	0	0	0	0	0	0	0	0	0	9.7025	0	0	0	0	0
A0A0P0V2J4	A0A0P0V2J4_ORYSJ	Os01g0357500 protein	Os01g0357500 OSNPB_010357500	Oryza sativa subsp. japonica (Rice)				YWVLKEK	0.9714	-5.0616	0	0	0	0	0	0	0	0	0	0	0	0	0	0	0	0	0	0	0	0	0	0	0	0	0	12.8466	0
A0A0P0V2J8	A0A0P0V2J8_ORYSJ	Os01g0362533 protein	Os01g0362533 OSNPB_010362533	Oryza sativa subsp. japonica (Rice)				HLGEIWFWIKSLR	0.98533	-9.2834	0	0	0	0	0	0	0	0	0	0	0	0	0	0	0	0	0	0	0	0	0	0	0	0	0	0	0
A0A0P0V2L6	A0A0P0V2L6_ORYSJ	Os01g0350500 protein	Os01g0350500 OSNPB_010350500	Oryza sativa subsp. japonica (Rice)				YYSDELK	0.9703	-2.0335	11.9881	0	0	0	0	0	0	0	0	0	0	0	0	0	0	0	0	0	0	0	0	0	0	0	0	0	0
A0A0P0V2Q3	A0A0P0V2Q3_ORYSJ	Os01g0343001 protein	Os01g0343001 OSNPB_010343001	Oryza sativa subsp. japonica (Rice)				HAVEDGRR	0.985	-1.7021	0	0	0	0	0	0	0	0	0	0	0	0	0	0	0	0	0	0	0	0	14.1748	0	0	0	0	0	0
A0A0P0V2U9	A0A0P0V2U9_ORYSJ	Os01g0366400 protein	Os01g0366400 OSNPB_010366400	Oryza sativa subsp. japonica (Rice)				FSSAKRR	0.94062	-0.00052908	0	0	0	0	0	0	0	0	0	0	0	0	0	0	0	0	0	0	0	0	0	0	0	0	0	0	0
A0A0P0V2X1	A0A0P0V2X1_ORYSJ	Os01g0392600 protein	Os01g0392600 OSNPB_010392600	Oryza sativa subsp. japonica (Rice)		membrane [GO:0016020]		ELRRSSFPR	0.97636	-4.3488	0	0	0	0	0	0	0	0	0	0	0	0	0	0	0	0	0	10.5686	0	10.7576	0	0	0	12.5876	0	0	0
A0A0P0V2Y9	A0A0P0V2Y9_ORYSJ	Tyrosine--tRNA ligase (EC 6.1.1.1) (Tyrosyl-tRNA synthetase)	Os01g0500900 B1080D07.16	Oryza sativa subsp. japonica (Rice)	post-embryonic development [GO:0009791]; reproductive structure development [GO:0048608]; tyrosyl-tRNA aminoacylation [GO:0006437]		ATP binding [GO:0005524]; RNA binding [GO:0003723]; tyrosine-tRNA ligase activity [GO:0004831]	FVHGEEGLEEALK	0.98296	-14.628	0	0	0	0	0	8.41992	0	0	0	12.5447	0	0	0	0	0	0	0	0	0	0	0	0	0	0	0	0	0
A0A0P0V312	A0A0P0V312_ORYSJ	Histone H2A	Os01g0502700 OSNPB_010502700	Oryza sativa subsp. japonica (Rice)		nucleosome [GO:0000786]; nucleus [GO:0005634]	DNA binding [GO:0003677]; protein heterodimerization activity [GO:0046982]; structural constituent of chromatin [GO:0030527]	AGLQFPVGR	0.97823	-7.6217	0	0	0	0	0	0	0	0	0	0	0	0	0	0	0	0	0	0	0	0	0	9.51773	0	0	0	0	0
A0A0P0V320	A0A0P0V320_ORYSJ	Os01g0363500 protein	Os01g0363500 OSNPB_010363500	Oryza sativa subsp. japonica (Rice)				TWMRIFVKVR	0.97786	-6.8113	0	0	0	0	0	0	0	0	0	0	0	0	0	0	0	0	0	0	0	0	0	0	0	9.27044	0	0	0
A0A0P0V337	A0A0P0V337_ORYSJ	Os01g0367300 protein	Os01g0367300 OSNPB_010367300	Oryza sativa subsp. japonica (Rice)				EEGLPTK	0.93975	-0.00052908	0	0	0	0	0	0	0	0	0	0	0	0	0	0	0	0	0	0	0	0	9.55723	0	0	0	0	0	0
A0A0P0V339	A0A0P0V339_ORYSJ	Os01g0384901 protein	Os01g0384901 OSNPB_010384901	Oryza sativa subsp. japonica (Rice)				CRSIAYQEKFR	0.97679	-6.3608	0	0	0	0	0	0	0	0	0	13.6455	0	0	0	0	0	0	0	0	0	0	0	0	0	0	0	0	13.7003
A0A0P0V384	A0A0P0V384_ORYSJ	Os01g0508000 protein	Os01g0508000 OSNPB_010508000	Oryza sativa subsp. japonica (Rice)	carbohydrate metabolic process [GO:0005975]		beta-D-fucosidase activity [GO:0033907]; beta-galactosidase activity [GO:0004565]; beta-glucosidase activity [GO:0008422]	FGLVYVDFR	0.97354	-6.1755	11.6044	0	0	0	0	0	0	0	0	0	0	0	0	0	0	0	0	0	0	0	0	0	0	0	0	0	0
A0A0P0V391	A0A0P0V391_ORYSJ	Os01g0515001 protein	Os01g0515001 OSNPB_010515001	Oryza sativa subsp. japonica (Rice)				EQQQSGLLVR	0.97508	-4.5402	0	0	0	0	0	0	0	9.03974	0	0	0	0	0	0	0	0	0	0	0	0	0	0	0	0	0	0	0
A0A0P0V393	A0A0P0V393_ORYSJ	Os01g0377250 protein	Os01g0377250 OSNPB_010377250	Oryza sativa subsp. japonica (Rice)				HEHVLHKK	0.98407	-1.7021	0	0	0	0	0	0	0	0	9.76138	0	0	0	0	0	0	0	0	0	0	0	0	0	0	0	0	0	0
A0A0P0V3F2	A0A0P0V3F2_ORYSJ	Os01g0523401 protein	Os01g0523401 OSNPB_010523401	Oryza sativa subsp. japonica (Rice)	translation [GO:0006412]	mitochondrial small ribosomal subunit [GO:0005763]	small ribosomal subunit rRNA binding [GO:0070181]; structural constituent of ribosome [GO:0003735]	NRHIPPLTQK	0.97933	-6.8113	0	0	10.1721	0	0	0	0	0	0	0	0	0	0	0	0	9.23558	0	0	0	0	0	0	0	0	0	0	0
A0A0P0V3F3	A0A0P0V3F3_ORYSJ	Os01g0522400 protein	Os01g0522400 OSNPB_010522400	Oryza sativa subsp. japonica (Rice)		membrane [GO:0016020]		DELTHVGLGSWR	0.98314	-14.582	0	0	0	0	0	0	0	0	0	0	0	0	0	0	0	0	14.4863	0	0	0	10.2206	0	0	0	0	0	0
A0A0P0V3F6	A0A0P0V3F6_ORYSJ	Os01g0523800 protein	Os01g0523800 OSNPB_010523800	Oryza sativa subsp. japonica (Rice)				NGYCQVLENVLAKK	0.98596	-11.787	0	0	0	0	0	0	0	0	0	0	0	0	0	0	0	0	0	0	0	0	0	0	0	0	0	0	0
A0A0P0V3G5	A0A0P0V3G5_ORYSJ	Os01g0524100 protein	Os01g0524100 OSNPB_010524100	Oryza sativa subsp. japonica (Rice)		membrane [GO:0016020]		RVAVELIIWMK	0.98453	-8.0639	0	0	0	0	0	0	0	0	0	0	0	10.925	0	0	0	0	0	0	0	0	0	0	0	0	0	0	0
A0A0P0V3G8	A0A0P0V3G8_ORYSJ	Os01g0523250 protein	Os01g0523250 OSNPB_010523250	Oryza sativa subsp. japonica (Rice)				SLPISPGISPNR	0.98551	-11.505	0	0	0	0	0	0	0	0	0	0	0	0	0	0	0	0	0	0	0	0	0	0	0	0	0	0	10.8002
A0A0P0V3H4	A0A0P0V3H4_ORYSJ	Os01g0525350 protein	Os01g0525350 OSNPB_010525350	Oryza sativa subsp. japonica (Rice)	negative regulation of cell population proliferation [GO:0008285]; shoot system development [GO:0048367]	plasma membrane [GO:0005886]		EGGGGGISK	0.98249	-15.202	0	0	0	0	0	0	0	0	0	0	0	0	0	0	0	0	0	0	0	0	0	0	0	0	0	0	0
A0A0P0V3I1	A0A0P0V3I1_ORYSJ	Os01g0525701 protein	Os01g0525701 OSNPB_010525701	Oryza sativa subsp. japonica (Rice)	negative regulation of cell population proliferation [GO:0008285]; shoot system development [GO:0048367]	plasma membrane [GO:0005886]		RRGGFSK	0.9765	-3.7939	0	0	0	0	0	0	0	0	0	0	0	0	0	0	0	0	0	10.7616	0	0	0	0	0	0	0	0	0
A0A0P0V3J4	A0A0P0V3J4_ORYSJ	Os01g0530341 protein	Os01g0530341 OSNPB_010530341	Oryza sativa subsp. japonica (Rice)				GTHMSVSHTKIIIK	0.98417	-14.332	0	0	0	0	0	0	0	11.3446	0	13.3973	0	0	0	0	0	0	0	0	0	0	0	0	0	0	0	0	0
A0A0P0V3P7	A0A0P0V3P7_ORYSJ	Os01g0519700 protein	Os01g0519700 OSNPB_010519700	Oryza sativa subsp. japonica (Rice)			zinc ion binding [GO:0008270]	EIPCSHIFTVLKYLR	0.98389	-10.701	0	0	0	0	0	0	0	0	0	0	0	0	0	0	0	0	0	0	0	0	0	0	0	0	0	0	0
A0A0P0V3Q8	A0A0P0V3Q8_ORYSJ	Os01g0519150 protein	Os01g0519150 OSNPB_010519150	Oryza sativa subsp. japonica (Rice)				MARLHHWWWR	0.97893	-6.8113	10.0673	0	9.36497	0	0	0	0	0	0	0	0	0	0	0	0	0	0	0	0	9.15901	0	0	0	0	0	0	0
A0A0P0V3S0	A0A0P0V3S0_ORYSJ	Os01g0523000 protein	Os01g0523000 OSNPB_010523000	Oryza sativa subsp. japonica (Rice)				EPPLPSSPGVPAR	0.97558	-24.912	0	0	0	0	0	0	11.9574	0	0	0	0	0	0	0	0	0	0	0	0	0	0	0	0	0	0	0	0
A0A0P0V3S5	A0A0P0V3S5_ORYSJ	Os01g0543600 protein	Os01g0543600 OSNPB_010543600	Oryza sativa subsp. japonica (Rice)			heme binding [GO:0020037]; iron ion binding [GO:0005506]; monooxygenase activity [GO:0004497]; oxidoreductase activity, acting on paired donors, with incorporation or reduction of molecular oxygen [GO:0016705]	LIYRTCIKPARR	0.97784	-7.6524	0	0	0	0	0	0	0	0	0	0	14.13	0	0	0	14.0914	0	12.1866	0	0	0	0	0	0	0	0	0	0
A0A0P0V3S6	A0A0P0V3S6_ORYSJ	Os01g0547732 protein	Os01g0547732 OSNPB_010547732	Oryza sativa subsp. japonica (Rice)				RPAFVRQRPR	0.97495	-6.2452	0	0	0	0	0	0	0	0	0	0	0	0	0	12.1641	0	0	0	0	0	0	0	0	0	0	0	0	0
A0A0P0V3X6	A0A0P0V3X6_ORYSJ	Os01g0551600 protein	Os01g0551600 OSNPB_010551600	Oryza sativa subsp. japonica (Rice)		nucleus [GO:0005634]	DNA binding [GO:0003677]; DNA-binding transcription factor activity [GO:0003700]	AAREMNVGLTVLKK	0.96035	-0.1146	0	0	0	0	0	0	0	15.7256	0	0	0	0	0	0	0	0	0	0	0	0	0	0	0	0	0	0	0
A0A0P0V3Y1	A0A0P0V3Y1_ORYSJ	Os01g0553200 protein	Os01g0553200 OSNPB_010553200	Oryza sativa subsp. japonica (Rice)				HHGSQHSVR	0.97599	-4.5014	0	0	0	8.64872	0	0	0	0	0	0	0	0	0	0	0	0	0	0	0	0	0	0	0	0	0	0	0
A0A0P0V3Y3	A0A0P0V3Y3_ORYSJ	Os01g0552050 protein	Os01g0552050 OSNPB_010552050	Oryza sativa subsp. japonica (Rice)				QHVMSISR	0.97508	-3.735	0	0	0	0	0	0	0	0	0	0	0	0	0	0	0	10.7886	0	0	0	0	0	0	0	0	0	0	0
A0A0P0V432	A0A0P0V432_ORYSJ	Os01g0560500 protein	Os01g0560500 OSNPB_010560500	Oryza sativa subsp. japonica (Rice)				RPPPPVDRR	0.96593	-2.4684	0	0	0	10.1213	0	0	0	0	0	0	0	0	0	0	0	10.8366	0	0	0	0	0	0	0	0	0	0	0
A0A0P0V452	A0A0P0V452_ORYSJ	Os01g0561950 protein	Os01g0561950 OSNPB_010561950	Oryza sativa subsp. japonica (Rice)				HVLVQPRER	0.96654	-2.4684	0	0	0	0	0	0	0	0	0	0	0	0	0	0	0	0	0	0	0	0	0	0	0	0	0	0	0
A0A0P0V459	A0A0P0V459_ORYSJ	Os01g0564532 protein	Os01g0564532 OSNPB_010564532	Oryza sativa subsp. japonica (Rice)				LPAFSMLR	0.97748	-3.735	0	0	0	0	0	0	11.672	0	0	0	0	0	0	0	0	0	0	0	0	0	0	0	0	0	0	0	0
A0A0P0V469	A0A0P0V469_ORYSJ	Os01g0550600 protein	Os01g0550600 OSNPB_010550600	Oryza sativa subsp. japonica (Rice)				AGKEAQEHAAELR	0.97026	-2.2492	0	0	0	0	0	0	0	0	0	0	0	0	0	0	0	0	0	0	0	0	0	0	0	0	0	0	0
A0A0P0V494	A0A0P0V494_ORYSJ	Os01g0568950 protein	Os01g0568950 OSNPB_010568950	Oryza sativa subsp. japonica (Rice)				APPSAAR	0.98226	-10.187	0	0	0	0	0	0	0	0	0	0	0	0	0	0	0	8.48071	0	0	0	0	0	0	0	0	0	0	0
A0A0P0V4A0	A0A0P0V4A0_ORYSJ	Os01g0571600 protein	Os01g0571600 OSNPB_010571600	Oryza sativa subsp. japonica (Rice)				RPCPVTATAFREGK	0.98568	-10.086	0	0	0	0	0	0	0	0	0	0	0	0	0	0	0	0	0	0	12.4316	0	0	0	0	0	0	0	0
A0A0P0V4A9	A0A0P0V4A9_ORYSJ	Os01g0571700 protein	Os01g0571700 OSNPB_010571700	Oryza sativa subsp. japonica (Rice)				NGTGSNKR	0.98325	-1.7021	0	0	0	0	0	0	0	0	0	0	0	0	0	0	0	0	0	0	9.89902	0	0	0	0	0	0	0	0
A0A0P0V4B2	A0A0P0V4B2_ORYSJ	Os01g0573132 protein	Os01g0573132 OSNPB_010573132	Oryza sativa subsp. japonica (Rice)				AISPAATASTPR	0.9846	-11.505	0	0	0	0	0	0	0	0	0	0	0	0	0	0	0	0	0	0	0	9.12841	0	0	0	0	0	0	0
A0A0P0V4E2	A0A0P0V4E2_ORYSJ	Os01g0571766 protein	Os01g0571766 OSNPB_010571766	Oryza sativa subsp. japonica (Rice)				QRLSAPRLLSLAMGPR	0.98556	-0.47532	0	0	0	0	0	0	0	0	0	0	0	0	0	0	0	0	0	0	0	0	0	0	0	0	0	0	0
A0A0P0V4F7	A0A0P0V4F7_ORYSJ	Os01g0572966 protein	Os01g0572966 OSNPB_010572966	Oryza sativa subsp. japonica (Rice)				ADLLRAPPGTGRPPR	0.98116	-0.36998	0	0	0	0	0	0	0	0	0	0	14.9838	0	0	0	0	0	0	0	0	0	0	0	0	0	14.8838	0	0
A0A0P0V4F8	A0A0P0V4F8_ORYSJ	Os01g0575000 protein	Os01g0575000 OSNPB_010575000	Oryza sativa subsp. japonica (Rice)		membrane [GO:0016020]	GTP binding [GO:0005525]	VPEEKTLITPVQCK	0.9879	-10.086	0	0	0	0	0	0	0	0	0	0	0	0	0	0	0	0	0	0	0	0	0	0	0	0	0	0	13.3011
A0A0P0V4K1	A0A0P0V4K1_ORYSJ	Os01g0585600 protein	Os01g0585600 OSNPB_010585600	Oryza sativa subsp. japonica (Rice)				TLEKLYEEEQK	0.98079	-8.0623	0	0	0	0	0	0	0	0	0	0	0	0	0	9.42673	0	0	0	0	0	0	0	0	0	0	0	0	0
A0A0P0V4K4	A0A0P0V4K4_ORYSJ	Os01g0586800 protein	Os01g0586800 OSNPB_010586800	Oryza sativa subsp. japonica (Rice)	response to stimulus [GO:0050896]	nucleus [GO:0005634]	DNA-binding transcription factor activity [GO:0003700]; sequence-specific DNA binding [GO:0043565]	VAGGKGAGELFNLAPPC	0.98175	-10.57	0	0	0	0	0	9.3692	0	0	0	0	0	0	0	0	0	0	0	0	0	0	0	0	0	0	0	0	0
A0A0P0V4K5	A0A0P0V4K5_ORYSJ	Os01g0586600 protein	Os01g0586600 OSNPB_010586600	Oryza sativa subsp. japonica (Rice)				AAPVLNPECGAPADWK	0.98366	-14.421	0	0	0	0	0	0	0	0	0	0	0	0	9.30421	0	0	0	0	0	0	0	0	0	0	0	0	0	0
A0A0P0V4L6	A0A0P0V4L6_ORYSJ	Os01g0586450 protein	Os01g0586450 OSNPB_010586450	Oryza sativa subsp. japonica (Rice)				VVVVAHPPLLVVAAR	0.98352	-14.435	8.8363	0	0	0	0	0	0	0	0	0	0	0	0	0	0	0	0	0	0	0	0	0	0	0	0	0	0
A0A0P0V4Q2	A0A0P0V4Q2_ORYSJ	Os01g0591250 protein	Os01g0591250 OSNPB_010591250	Oryza sativa subsp. japonica (Rice)		membrane [GO:0016020]		FLVTMPAARPYR	0.97975	-7.7702	0	0	0	0	0	0	12.1979	0	0	0	0	0	0	0	0	0	0	0	12.7079	0	0	0	0	0	0	0	0
A0A0P0V4R3	A0A0P0V4R3_ORYSJ	Os01g0593900 protein	Os01g0593900 OSNPB_010593900	Oryza sativa subsp. japonica (Rice)				APHHRVHQRR	0.97197	-3.2084	0	0	0	0	0	0	0	0	0	0	0	0	9.34087	0	0	0	0	0	0	0	0	0	0	0	0	0	0
A0A0P0V4S1	A0A0P0V4S1_ORYSJ	Os01g0594400 protein	Os01g0594400 OSNPB_010594400	Oryza sativa subsp. japonica (Rice)				AAHNAGIR	0.97399	-3.2122	0	0	0	0	10.3927	0	0	0	0	9.36166	0	0	0	0	0	0	9.70506	0	0	0	0	0	0	0	0	0	0
A0A0P0V4T3	A0A0P0V4T3_ORYSJ	Os01g0596001 protein	Os01g0596001 OSNPB_010596001	Oryza sativa subsp. japonica (Rice)				EDVGAAR	0.96486	-2.0335	0	0	0	0	0	0	0	0	0	0	0	0	0	0	0	0	0	0	0	0	0	0	0	0	0	0	0
A0A0P0V4V2	A0A0P0V4V2_ORYSJ	Os01g0597701 protein	Os01g0597701 OSNPB_010597701	Oryza sativa subsp. japonica (Rice)				DAVDFLIGLLRVRLVR	0.97629	-4.2104	0	0	0	0	0	0	0	0	0	0	0	0	0	0	10.7256	0	0	0	0	0	0	0	0	0	0	0	0
A0A0P0V4W8	A0A0P0V4W8_ORYSJ	Os01g0601500 protein	Os01g0601500 OSNPB_010601500	Oryza sativa subsp. japonica (Rice)				CPLPPTKRVPLLR	0.97532	-26.593	11.5176	0	0	0	0	0	0	0	0	0	0	0	0	0	0	0	0	0	15.3575	0	0	0	0	0	0	0	0
A0A0P0V4X1	A0A0P0V4X1_ORYSJ	Os01g0600700 protein	Os01g0600700 OSNPB_010600700	Oryza sativa subsp. japonica (Rice)				AGDSGYIVGGR	0.98394	-12.631	0	0	12.4773	0	0	0	0	0	0	0	0	0	0	0	0	0	0	0	0	0	0	0	0	0	0	0	0
A0A0P0V4X4	A0A0P0V4X4_ORYSJ	Os01g0601000 protein	Os01g0601000 OSNPB_010601000	Oryza sativa subsp. japonica (Rice)	magnesium ion transport [GO:0015693]	membrane [GO:0016020]	metal ion transmembrane transporter activity [GO:0046873]	EEIIFELLK	0.9758	-4.5014	0	0	0	0	0	0	0	0	0	0	0	0	0	0	0	0	15.2058	0	0	0	0	0	0	0	0	0	0
A0A0P0V4Y3	A0A0P0V4Y3_ORYSJ	Os01g0602466 protein	Os01g0602466 OSNPB_010602466	Oryza sativa subsp. japonica (Rice)				GLPCAAPTPTAPWR	0.98602	-10.086	0	0	0	0	0	0	0	0	0	0	0	0	0	0	0	0	0	0	9.83425	0	0	0	0	0	0	0	0
A0A0P0V514	A0A0P0V514_ORYSJ	Protein FAR1-RELATED SEQUENCE	Os01g0607050 OSNPB_010607050	Oryza sativa subsp. japonica (Rice)	regulation of DNA-templated transcription [GO:0006355]	nucleus [GO:0005634]	zinc ion binding [GO:0008270]	FEFLGILCCHALK	0.97489	-37.039	0	0	0	0	0	11.3022	0	0	0	0	0	0	0	0	0	0	0	0	0	0	0	0	0	0	0	0	0
A0A0P0V529	A0A0P0V529_ORYSJ	Os01g0609300 protein	Os01g0609300 OSNPB_010609300	Oryza sativa subsp. japonica (Rice)		membrane [GO:0016020]	ABC-type transporter activity [GO:0140359]	YFESIPGVSKIK	0.95322	-1.6736	0	0	0	0	0	0	0	0	0	0	8.86505	0	0	0	0	0	0	0	0	0	0	0	0	0	0	0	0
A0A0P0V534	A0A0P0V534_ORYSJ	Os01g0608200 protein	Os01g0608200 OSNPB_010608200	Oryza sativa subsp. japonica (Rice)				RRAWAVPVAQR	0.98051	-8.0623	0	0	0	0	0	0	0	0	0	0	0	0	0	0	0	0	0	0	0	0	0	0	0	0	0	0	0
A0A0P0V567	A0A0P0V567_ORYSJ	Os01g0612750 protein	Os01g0612750 OSNPB_010612750	Oryza sativa subsp. japonica (Rice)				RRHTAPR	0.98147	-6.394	0	0	0	0	0	0	0	0	0	0	0	0	0	0	0	0	0	0	0	10.5267	0	0	8.98829	0	0	0	0
A0A0P0V571	A0A0P0V571_ORYSJ	Os01g0612700 protein	Os01g0612700 OSNPB_010612700	Oryza sativa subsp. japonica (Rice)		nucleus [GO:0005634]		MQEEAPGSK	0.9759	-4.5014	0	0	0	0	0	0	0	0	9.82907	0	0	0	0	0	0	0	0	0	0	0	0	0	0	0	0	0	0
A0A0P0V590	A0A0P0V590_ORYSJ	Os01g0616366 protein	Os01g0616366 OSNPB_010616366	Oryza sativa subsp. japonica (Rice)				ALRRQLAGVAPPAR	0.98509	-11.787	0	0	8.96492	0	0	0	0	0	0	0	0	0	0	0	0	0	0	0	9.82297	0	0	0	0	10.212	0	0	9.4453
A0A0P0V597	A0A0P0V597_ORYSJ	Os01g0615250 protein	Os01g0615250 OSNPB_010615250	Oryza sativa subsp. japonica (Rice)				EPVAHPGHGVLLAVR	0.98383	-10.701	0	0	0	0	0	12.4635	0	0	0	0	12.5433	0	0	0	0	0	0	0	0	0	0	0	0	0	0	0	0
A0A0P0V598	A0A0P0V598_ORYSJ	Os01g0612000 protein	Os01g0612000 OSNPB_010612000	Oryza sativa subsp. japonica (Rice)	negative regulation of gene expression, epigenetic [GO:0045814]; tRNA C5-cytosine methylation [GO:0002946]	nucleus [GO:0005634]	tRNA (cytosine-5-)-methyltransferase activity [GO:0016428]	YFCLAKR	0.92798	-0.00052908	0	0	0	0	0	0	0	0	0	0	0	0	11.2261	0	0	0	0	0	0	0	0	0	0	0	0	0	0
A0A0P0V5B3	A0A0P0V5B3_ORYSJ	Os01g0618300 protein	Os01g0618300	Oryza sativa subsp. japonica (Rice)		membrane [GO:0016020]		FVRVVAFVER	0.98386	-8.5133	11.9428	0	8.47756	0	0	0	0	0	0	0	0	0	0	8.72976	0	0	0	0	0	0	0	0	0	0	0	0	0
A0A0P0V5B8	A0A0P0V5B8_ORYSJ	Os01g0614750 protein	Os01g0614750 OSNPB_010614750	Oryza sativa subsp. japonica (Rice)				VSEVVVHALLR	0.98226	-10.095	0	0	0	0	0	0	0	0	0	0	0	0	0	0	0	0	0	0	0	0	0	0	0	0	0	0	0
A0A0P0V5E8	A0A0P0V5E8_ORYSJ	Os01g0622066 protein	Os01g0622066 OSNPB_010622066	Oryza sativa subsp. japonica (Rice)		membrane [GO:0016020]		LGNPVRR	0.97337	-3.1818	0	0	0	0	0	0	0	0	0	0	0	0	0	0	0	0	0	0	0	0	0	0	0	0	0	8.77699	0
A0A0P0V5G6	A0A0P0V5G6_ORYSJ	Os01g0627600 protein	Os01g0627600 OSNPB_010627600	Oryza sativa subsp. japonica (Rice)			heme binding [GO:0020037]; iron ion binding [GO:0005506]; monooxygenase activity [GO:0004497]; oxidoreductase activity, acting on paired donors, with incorporation or reduction of molecular oxygen [GO:0016705]	NKLDYEGLSKLK	0.98604	-9.8037	8.79002	0	0	0	0	0	0	0	0	0	0	0	0	0	0	0	0	0	0	0	0	0	0	0	0	0	0
A0A0P0V5M4	A0A0P0V5M4_ORYSJ	Os01g0632700 protein	Os01g0632700 OSNPB_010632700	Oryza sativa subsp. japonica (Rice)				LRSPHSLSQTRR	0.97513	-3.4819	0	0	0	0	0	0	0	0	0	0	0	0	0	0	0	0	0	0	0	0	0	0	0	0	0	0	0
A0A0P0V5P2	A0A0P0V5P2_ORYSJ	Os01g0637300 protein	Os01g0637300 OSNPB_010637300	Oryza sativa subsp. japonica (Rice)				LCLAPPPPPR	0.9868	-8.8442	0	0	0	0	0	0	0	0	0	0	0	0	0	0	0	0	0	0	0	0	0	0	0	0	0	9.92667	0
A0A0P0V5P8	A0A0P0V5P8_ORYSJ	Acyl-CoA ligase-like	P0696E01.6	Oryza sativa subsp. japonica (Rice)	lipid biosynthetic process [GO:0008610]	membrane [GO:0016020]	ligase activity [GO:0016874]	LMFACQR	0.97838	-17.969	0	0	0	0	0	0	9.70287	0	0	0	0	0	0	0	0	0	0	0	0	0	0	0	0	0	0	0	0
A0A0P0V5Q4	A0A0P0V5Q4_ORYSJ	Os01g0637100 protein	Os01g0637100 OSNPB_010637100	Oryza sativa subsp. japonica (Rice)	cellular lipid metabolic process [GO:0044255]		phosphatidate phosphatase activity [GO:0008195]	IFIINPKGGSSHK	0.98278	-10.985	0	0	0	0	0	15.7194	0	0	0	0	0	0	0	0	0	0	0	0	0	0	0	0	0	0	0	0	0
A0A0P0V5S7	A0A0P0V5S7_ORYSJ	Os01g0641750 protein	Os01g0641750 OSNPB_010641750	Oryza sativa subsp. japonica (Rice)				QLRPVEHVHDR	0.97864	-6.3608	0	0	0	0	0	0	0	0	0	0	0	0	0	0	0	0	0	0	0	0	0	0	0	0	0	0	0
A0A0P0V5T0	A0A0P0V5T0_ORYSJ	Os01g0640400 protein	Os01g0640400 OSNPB_010640400	Oryza sativa subsp. japonica (Rice)				VDAAEGR	0.96206	-2.0335	0	0	0	0	0	0	0	0	0	0	0	0	0	0	0	10.4006	0	0	0	0	0	0	0	0	0	0	0
A0A0P0V5T7	A0A0P0V5T7_ORYSJ	Os01g0635600 protein	Os01g0635600 OSNPB_010635600	Oryza sativa subsp. japonica (Rice)				AGVGAGVG	0.97553	-23.742	0	0	0	0	0	0	0	0	0	0	0	0	0	0	0	0	0	0	0	0	0	8.97137	0	0	0	0	0
A0A0P0V5U2	A0A0P0V5U2_ORYSJ	Os01g0645200 protein	Os01g0645200 OSNPB_010645200	Oryza sativa subsp. japonica (Rice)				TPLSPPPPSAR	0.98255	-10.095	0	0	0	10.6253	0	0	0	0	0	0	0	0	0	0	0	0	0	0	0	0	0	0	0	0	0	0	0
A0A0P0V604	A0A0P0V604_ORYSJ	Os01g0651450 protein	Os01g0651450 OSNPB_010651450	Oryza sativa subsp. japonica (Rice)				LRAQGRR	0.941	-0.00052908	0	0	0	0	0	0	0	0	0	0	0	0	0	0	0	0	0	0	0	0	0	0	0	0	0	0	0
A0A0P0V629	A0A0P0V629_ORYSJ	Os01g0654450 protein	Os01g0654450 OSNPB_010654450	Oryza sativa subsp. japonica (Rice)				ALRPRHCCK	0.97583	-2.4684	0	0	0	0	0	0	0	0	0	0	0	0	0	0	0	10.3765	0	0	0	0	0	0	0	0	0	0	0
A0A0P0V642	A0A0P0V642_ORYSJ	Os01g0658600 protein	Os01g0658600 OSNPB_010658600	Oryza sativa subsp. japonica (Rice)				GLGPSAR	0.9809	-7.9185	0	0	0	0	0	0	12.4217	0	0	0	0	0	0	10.5148	0	0	0	0	0	0	0	0	0	0	0	0	12.1517
A0A0P0V650	A0A0P0V650_ORYSJ	Os01g0655700 protein	Os01g0655700 OSNPB_010655700	Oryza sativa subsp. japonica (Rice)				DLIWTERRVLGK	0.98692	-9.4717	0	0	0	0	0	0	0	0	0	0	0	0	0	0	0	0	0	16.0147	0	0	0	0	0	0	0	0	0
A0A0P0V665	A0A0P0V665_ORYSJ	Os01g0658800 protein	Os01g0658800 OSNPB_010658800	Oryza sativa subsp. japonica (Rice)				ALTEGQQKLCR	0.9807	-8.0623	15.6761	0	0	0	0	0	0	0	0	0	0	0	0	0	0	0	0	0	0	0	0	0	0	0	0	0	0
A0A0P0V679	A0A0P0V679_ORYSJ	Os01g0663400 protein	Os01g0663400 OSNPB_010663400	Oryza sativa subsp. japonica (Rice)	lipid metabolic process [GO:0006629]; proteolysis [GO:0006508]		aspartic-type endopeptidase activity [GO:0004190]	VGFAEAA	0.9315	-0.00052908	0	0	0	0	0	0	0	0	0	0	0	0	0	0	0	0	0	0	0	0	0	0	0	0	0	0	0
A0A0P0V690	A0A0P0V690_ORYSJ	Os01g0662925 protein	Os01g0662925 OSNPB_010662925	Oryza sativa subsp. japonica (Rice)				MPFIYYTYHVIV	0.98599	-7.7702	0	0	0	0	0	0	0	0	0	0	0	0	0	0	0	0	0	0	0	0	0	0	0	0	0	0	0
A0A0P0V694	A0A0P0V694_ORYSJ	Os01g0664851 protein	Os01g0664851 OSNPB_010664851	Oryza sativa subsp. japonica (Rice)				GCSGGGRQRGCR	0.98665	-9.4717	0	0	0	0	0	0	0	0	0	0	0	0	0	0	0	0	0	0	0	0	0	0	0	0	0	0	0
A0A0P0V6A9	A0A0P0V6A9_ORYSJ	Os01g0668200 protein	Os01g0668200 OSNPB_010668200	Oryza sativa subsp. japonica (Rice)	positive regulation of transcription by RNA polymerase II [GO:0045944]	nucleus [GO:0005634]	ATP hydrolysis activity [GO:0016887]; chromatin binding [GO:0003682]; histone binding [GO:0042393]	ERTEELGSAVLEGR	0.98643	-10.086	0	0	0	0	0	0	0	0	0	0	0	0	0	0	0	0	0	0	0	0	0	0	0	0	0	0	0
A0A0P0V6B1	A0A0P0V6B1_ORYSJ	Os01g0667750 protein	Os01g0667750 OSNPB_010667750	Oryza sativa subsp. japonica (Rice)				VLAGLHIALRR	0.98037	-8.0623	0	0	0	0	9.93026	0	0	0	0	0	0	0	0	0	0	0	0	0	0	0	0	0	0	0	0	0	0
A0A0P0V6G2	A0A0P0V6G2_ORYSJ	Os01g0678100 protein	Os01g0678100 B1144G04.22	Oryza sativa subsp. japonica (Rice)		membrane [GO:0016020]		HAMGEMNKSRTTVVR	0.98596	-12.374	0	0	0	0	0	0	0	0	0	0	0	0	0	0	0	0	0	0	0	0	0	0	0	0	0	0	0
A0A0P0V6H1	A0A0P0V6H1_ORYSJ	Os01g0676500 protein	Os01g0676500 OSNPB_010676500	Oryza sativa subsp. japonica (Rice)				LAPAGKEKGR	0.97791	-6.2452	0	0	0	0	0	0	0	0	0	0	0	0	0	0	0	0	0	0	0	0	0	0	0	0	0	11.8563	0
A0A0P0V6I2	A0A0P0V6I2_ORYSJ	Os01g0668700 protein	Os01g0668700 OSNPB_010668700	Oryza sativa subsp. japonica (Rice)				MTRLPVSRR	0.96701	-2.4684	0	0	0	0	0	0	0	0	0	0	0	0	0	0	0	0	0	0	0	0	0	0	0	0	0	0	0
A0A0P0V6J4	A0A0P0V6J4_ORYSJ	Os01g0678600 protein	Os01g0678600 OSNPB_010678600	Oryza sativa subsp. japonica (Rice)	translation [GO:0006412]	ribonucleoprotein complex [GO:1990904]; ribosome [GO:0005840]	rRNA binding [GO:0019843]; structural constituent of ribosome [GO:0003735]	AIDKTVKVGAMHR	0.94452	-0.00052908	0	0	0	0	0	0	0	0	0	0	0	0	0	0	0	0	0	0	0	0	0	0	0	0	0	0	0
A0A0P0V6K5	A0A0P0V6K5_ORYSJ	Os01g0680000 protein	Os01g0680000 OSNPB_010680000	Oryza sativa subsp. japonica (Rice)				GAGLLKSSG	0.96774	-2.6687	0	0	0	0	0	0	0	0	0	0	0	0	0	8.8636	0	0	0	0	0	0	0	0	0	0	9.17794	0	0
A0A0P0V6N8	A0A0P0V6N8_ORYSJ	Katanin p60 ATPase-containing subunit A1 (Katanin p60 subunit A1) (EC 5.6.1.1) (p60 katanin)	KATNA1 Os01g0683100 OSNPB_010683100	Oryza sativa subsp. japonica (Rice)	microtubule severing [GO:0051013]	cytoplasm [GO:0005737]; microtubule [GO:0005874]	ATP binding [GO:0005524]; ATP hydrolysis activity [GO:0016887]; isomerase activity [GO:0016853]; microtubule binding [GO:0008017]; microtubule severing ATPase activity [GO:0008568]	DASMNGMR	0.97402	-28.246	0	0	0	10.4889	10.5083	10.676	0	0	0	0	10.3115	0	0	0	0	0	0	0	0	0	0	0	0	0	0	0	0
A0A0P0V6P5	A0A0P0V6P5_ORYSJ	Os01g0684800 protein	Os01g0684800 OSNPB_010684800	Oryza sativa subsp. japonica (Rice)	protein prenylation [GO:0018342]	cytoplasm [GO:0005737]	protein prenyltransferase activity [GO:0008318]	KMVLSVNYDFTKLK	0.98568	-12.335	0	0	0	0	0	0	0	0	0	0	0	0	0	0	0	0	0	0	12.9218	0	0	0	0	0	0	0	0
A0A0P0V6P9	A0A0P0V6P9_ORYSJ	Os01g0686050 protein	Os01g0686050 OSNPB_010686050	Oryza sativa subsp. japonica (Rice)				CPSHGLLRHAKGIK	0.97687	-6.9259	0	0	0	0	0	0	0	0	0	0	0	0	0	0	0	0	0	0	0	0	0	0	0	0	0	0	0
A0A0P0V6Q6	A0A0P0V6Q6_ORYSJ	Os01g0685400 protein	Os01g0685400 OSNPB_010685400	Oryza sativa subsp. japonica (Rice)			DNA binding [GO:0003677]	RWSIIASKLPGR	0.98918	-7.7702	0	0	0	0	0	0	0	0	0	0	0	0	0	0	0	0	0	0	0	0	0	0	0	0	0	0	0
A0A0P0V6R1	A0A0P0V6R1_ORYSJ	Os01g0682700 protein	Os01g0682700 OSNPB_010682700	Oryza sativa subsp. japonica (Rice)				WHMATLCRLWK	0.97801	-6.3608	0	0	0	0	0	0	0	0	0	0	0	0	13.4009	0	0	0	0	0	0	0	0	0	0	0	0	0	0
A0A0P0V6T5	A0A0P0V6T5_ORYSJ	Os01g0688200 protein	Os01g0688200 OSNPB_010688200	Oryza sativa subsp. japonica (Rice)		chloroplast [GO:0009507]; membrane [GO:0016020]	lipase activity [GO:0016298]	DRKPPRLEGASEELR	0.97603	-1.2684	0	0	0	0	0	0	0	0	0	0	0	0	0	0	0	0	0	0	0	0	0	0	0	0	0	0	0
A0A0P0V6T8	A0A0P0V6T8_ORYSJ	Os01g0685850 protein	Os01g0685850 OSNPB_010685850	Oryza sativa subsp. japonica (Rice)				AAVGVER	0.97787	-3.6711	0	0	0	0	0	0	0	0	0	0	0	0	0	0	0	0	0	0	0	0	0	0	0	12.8705	0	0	0
A0A0P0V6V1	A0A0P0V6V1_ORYSJ	Os01g0693100 protein	Os01g0693100 OSNPB_010693100	Oryza sativa subsp. japonica (Rice)				KACMWPQIPNEKR	0.96936	-2.2492	0	0	0	0	0	0	0	0	0	0	0	0	0	0	0	0	9.94152	0	0	0	0	0	0	0	0	0	0
A0A0P0V6Z7	A0A0P0V6Z7_ORYSJ	Os01g0695300 protein (Putative farnesyl-pyrophosphate synthetase fps2)	Os01g0695300 P0431H09.30	Oryza sativa subsp. japonica (Rice)	isoprenoid biosynthetic process [GO:0008299]		transferase activity, transferring alkyl or aryl (other than methyl) groups [GO:0016765]	CSWLFVQALERADEK	0.97777	-19.545	0	0	0	0	0	10.2818	0	0	0	0	0	0	0	0	0	0	9.65721	0	0	0	0	0	0	0	0	0	0
A0A0P0V701	A0A0P0V701_ORYSJ	Os01g0692050 protein	Os01g0692050 OSNPB_010692050	Oryza sativa subsp. japonica (Rice)				YFLHLENPRRR	0.98088	-8.0623	0	0	0	0	0	0	0	0	0	0	0	0	0	0	0	0	0	0	0	0	0	0	0	0	0	0	0
A0A0P0V725	A0A0P0V725_ORYSJ	Os01g0701100 protein	Os01g0701100 OSNPB_010701100	Oryza sativa subsp. japonica (Rice)				GFVRLSRR	0.98391	-1.7021	0	0	0	0	0	0	0	0	0	0	0	0	0	0	0	0	0	0	0	0	0	0	0	0	0	0	0
A0A0P0V727	A0A0P0V727_ORYSJ	Os01g0703800 protein	Os01g0703800 OSNPB_010703800	Oryza sativa subsp. japonica (Rice)				LTLSTTSK	0.97443	-3.2122	0	0	0	0	0	0	0	0	0	0	0	0	0	12.2536	0	0	0	0	0	0	0	0	0	0	0	0	0
A0A0P0V733	A0A0P0V733_ORYSJ	Os01g0700200 protein (Zinc finger protein-like)	Os01g0700200 P0047E11.4 P0454A11.23	Oryza sativa subsp. japonica (Rice)			metal ion binding [GO:0046872]	AALAPTPGKPHR	0.9756	-38.901	0	0	14.0718	0	13.2233	0	0	0	0	0	0	0	0	0	0	0	0	0	0	0	17.3993	0	0	0	0	0	10.2009
A0A0P0V734	A0A0P0V734_ORYSJ	Os01g0700300 protein	Os01g0700300 OSNPB_010700300	Oryza sativa subsp. japonica (Rice)	methylation [GO:0032259]		S-adenosylmethionine-dependent methyltransferase activity [GO:0008757]	AVLRAVDR	0.97726	-22.91	0	0	0	0	0	0	0	0	0	0	0	0	0	0	0	0	0	0	0	0	0	0	0	0	0	0	0
A0A0P0V737	A0A0P0V737_ORYSJ	Os01g0697200 protein	Os01g0697200 OSNPB_010697200	Oryza sativa subsp. japonica (Rice)				MLPHNVR	0.9614	-2.0335	0	0	0	0	0	0	0	0	0	0	0	0	0	0	0	0	0	0	0	0	0	0	0	0	0	0	0
A0A0P0V749	A0A0P0V749_ORYSJ	Os01g0702300 protein	Os01g0702300 OSNPB_010702300	Oryza sativa subsp. japonica (Rice)	proteolysis [GO:0006508]	extracellular space [GO:0005615]	serine-type endopeptidase activity [GO:0004252]	DFPAYRELVRNQK	0.98306	-10.985	0	0	0	0	0	0	0	0	0	0	0	0	0	0	0	0	0	0	0	0	0	10.3184	0	0	0	0	0
A0A0P0V758	A0A0P0V758_ORYSJ	Os01g0705600 protein	Os01g0705600 OSNPB_010705600	Oryza sativa subsp. japonica (Rice)				FTGDSGR	0.9621	-2.0335	0	0	0	0	0	0	0	0	0	0	0	0	0	0	0	0	0	0	0	0	0	0	0	0	0	0	0
A0A0P0V769	A0A0P0V769_ORYSJ	Os01g0705000 protein	Os01g0705000 OSNPB_010705000	Oryza sativa subsp. japonica (Rice)				LSLPACVRR	0.97538	-2.4684	0	0	0	0	0	0	0	0	0	0	0	0	0	0	0	0	0	0	0	0	0	0	0	0	0	0	0
A0A0P0V770	A0A0P0V770_ORYSJ	Os01g0706332 protein	Os01g0706332 OSNPB_010706332	Oryza sativa subsp. japonica (Rice)				TTVSISR	0.96154	-2.0335	0	0	0	10.0298	0	0	0	0	0	0	0	0	0	0	0	10.5252	0	0	0	0	0	0	0	0	0	0	0
A0A0P0V781	A0A0P0V781_ORYSJ	Os01g0702500 protein	Os01g0702500 OSNPB_010702500	Oryza sativa subsp. japonica (Rice)	response to water [GO:0009415]			EKLPGSHK	0.98413	-1.7021	14.375	0	0	0	0	0	0	0	0	0	0	0	0	0	14.4072	0	0	0	0	0	0	0	0	0	0	0	0
A0A0P0V792	A0A0P0V792_ORYSJ	Os01g0711200 protein (Receptor protein kinase-like)	Os01g0711200 B1142C05.3 P0456F08.28	Oryza sativa subsp. japonica (Rice)	protein phosphorylation [GO:0006468]	membrane [GO:0016020]	ATP binding [GO:0005524]; protein kinase activity [GO:0004672]	NSLVGPLPASLGAMAR	0.96874	-2.1125	0	0	0	0	0	0	0	0	0	0	0	0	0	0	0	0	0	0	0	0	0	0	0	0	0	0	0
A0A0P0V7A8	A0A0P0V7A8_ORYSJ	Os01g0711900 protein	Os01g0711900 OSNPB_010711900	Oryza sativa subsp. japonica (Rice)				TKAGLPGRQDE	0.98057	-8.0623	0	0	0	0	0	0	0	0	0	0	0	0	0	0	0	0	0	0	0	0	0	0	0	0	0	0	0
A0A0P0V7B9	A0A0P0V7B9_ORYSJ	KRR1 small subunit processome component (KRR-R motif-containing protein 1)	Os01g0713800 OSNPB_010713800	Oryza sativa subsp. japonica (Rice)	rRNA processing [GO:0006364]	nucleolus [GO:0005730]; small-subunit processome [GO:0032040]	RNA binding [GO:0003723]	HPVYHIK	0.9842	-14.192	0	0	0	0	0	0	0	0	0	0	0	0	14.2394	0	0	0	0	0	0	0	0	0	0	0	0	0	0
A0A0P0V7C6	A0A0P0V7C6_ORYSJ	Os01g0715700 protein	Os01g0715700 OSNPB_010715700	Oryza sativa subsp. japonica (Rice)	RNA modification [GO:0009451]		RNA binding [GO:0003723]; zinc ion binding [GO:0008270]	VFNREIVMR	0.97289	-4.5114	0	0	0	0	0	0	0	0	0	0	0	0	0	0	0	0	0	9.33648	0	0	0	0	0	0	0	0	0
A0A0P0V7G8	A0A0P0V7G8_ORYSJ	Os01g0715400 protein	Os01g0715400 OSNPB_010715400	Oryza sativa subsp. japonica (Rice)				NLVVGLSSRRGQR	0.97779	-19.379	0	0	0	15.1346	15.0762	0	0	10.7579	0	0	0	0	0	0	0	0	0	16.4345	16.4515	0	0	17.3065	0	0	0	0	0
A0A0P0V7I3	A0A0P0V7I3_ORYSJ	Os01g0721100 protein	Os01g0721100 OSNPB_010721100	Oryza sativa subsp. japonica (Rice)			ATP binding [GO:0005524]	GHQVLARTTSSLWCKR	0.97752	-19.198	0	0	0	0	0	0	0	0	0	0	0	0	0	0	0	0	0	0	0	11.0374	0	0	0	0	0	0	0
A0A0P0V7L2	A0A0P0V7L2_ORYSJ	Os01g0723025 protein	Os01g0723025 OSNPB_010723025	Oryza sativa subsp. japonica (Rice)				GPLGSQLRMAVA	0.9868	-9.4717	0	0	0	0	0	0	0	0	0	0	0	0	0	0	0	0	0	0	0	0	0	0	0	14.9978	0	0	0
A0A0P0V7M6	A0A0P0V7M6_ORYSJ	Os01g0724250 protein	Os01g0724250 OSNPB_010724250	Oryza sativa subsp. japonica (Rice)				GGGGGGGDGG	0.97077	-1.8178	0	0	0	0	0	0	0	0	0	0	0	0	0	0	0	0	0	0	0	0	0	0	0	0	0	0	0
A0A0P0V7N3	A0A0P0V7N3_ORYSJ	Os01g0727301 protein	Os01g0727301 OSNPB_010727301	Oryza sativa subsp. japonica (Rice)				RWERGEE	0.94228	-0.00052908	0	0	0	0	0	0	0	0	0	0	0	0	0	0	0	0	0	0	0	0	0	0	0	0	11.3009	0	0
A0A0P0V7N6	A0A0P0V7N6_ORYSJ	Os01g0727820 protein	Os01g0727820 OSNPB_010727820	Oryza sativa subsp. japonica (Rice)				EEEVVLVRR	0.97333	-4.9368	0	0	0	0	0	10.1636	0	0	0	0	0	0	0	11.4641	0	0	0	0	0	0	9.61596	0	0	0	0	0	0
A0A0P0V7Q1	A0A0P0V7Q1_ORYSJ	Os01g0728325 protein	Os01g0728325 OSNPB_010728325	Oryza sativa subsp. japonica (Rice)				YLVPRRPCAR	0.97433	-3.2085	0	0	0	0	0	0	0	0	10.9199	0	0	0	0	0	0	0	0	0	0	0	0	0	0	0	0	0	0
A0A0P0V7S0	A0A0P0V7S0_ORYSJ	Os01g0731150 protein	Os01g0731150 OSNPB_010731150	Oryza sativa subsp. japonica (Rice)				RAATPCSSR	0.96905	-1.3909	0	0	0	0	10.6346	0	0	0	0	0	0	0	0	0	0	0	0	0	0	0	0	0	0	0	0	0	0
A0A0P0V7U1	A0A0P0V7U1_ORYSJ	Os01g0734150 protein	Os01g0734150 OSNPB_010734150	Oryza sativa subsp. japonica (Rice)				GVVPAEPHR	0.97566	-4.5014	0	0	0	12.5672	0	0	0	0	0	0	0	0	0	0	0	0	0	0	0	13.7172	0	0	0	0	0	0	0
A0A0P0V7U9	A0A0P0V7U9_ORYSJ	Os01g0731600 protein	Os01g0731600 OSNPB_010731600	Oryza sativa subsp. japonica (Rice)				RARCAQPPEFR	0.97813	-18.158	0	0	0	0	0	0	0	0	0	0	0	0	0	0	9.75799	0	0	0	0	0	0	0	0	0	0	0	0
A0A0P0V7V2	A0A0P0V7V2_ORYSJ	Os01g0734399 protein	Os01g0734399 OSNPB_010734399	Oryza sativa subsp. japonica (Rice)				HTGRRIIAIFSFR	0.97601	-6.2457	0	0	0	0	0	0	0	0	0	0	0	0	0	0	0	0	0	0	0	16.2483	0	0	0	0	0	0	0
A0A0P0V7X0	A0A0P0V7X0_ORYSJ	Os01g0736551 protein	Os01g0736551 OSNPB_010736551	Oryza sativa subsp. japonica (Rice)				CPSPAAPPIGGVLR	0.98366	-13.82	0	0	0	0	0	0	0	0	0	0	0	0	0	0	0	0	0	0	0	0	0	0	0	0	0	0	0
A0A0P0V7Y3	A0A0P0V7Y3_ORYSJ	Os01g0738600 protein	Os01g0738600 OSNPB_010738600	Oryza sativa subsp. japonica (Rice)		clathrin-coated vesicle [GO:0030136]; Golgi apparatus [GO:0005794]		EVGSFKDIHTG	0.98215	-15.832	0	0	0	0	0	0	0	0	0	0	0	0	0	0	0	0	0	0	9.7612	13.947	0	0	0	0	0	0	0
A0A0P0V7Y6	A0A0P0V7Y6_ORYSJ	Os01g0737300 protein	Os01g0737300 OSNPB_010737300	Oryza sativa subsp. japonica (Rice)	DNA repair [GO:0006281]; nucleotide phosphorylation [GO:0046939]	nucleus [GO:0005634]	double-stranded DNA binding [GO:0003690]; polydeoxyribonucleotide 5'-hydroxyl-kinase activity [GO:0046404]; polynucleotide 3'-phosphatase activity [GO:0046403]; zinc ion binding [GO:0008270]	VFNTVIFR	0.97561	-3.735	0	0	0	0	0	0	0	0	0	0	0	0	0	0	0	0	0	0	0	0	0	0	11.8216	0	0	0	0
A0A0P0V834	A0A0P0V834_ORYSJ	Os01g0747050 protein	Os01g0747050 OSNPB_010747050	Oryza sativa subsp. japonica (Rice)				ADVVASLHLRGK	0.98556	-7.7702	0	16.9064	0	0	0	0	0	0	0	0	0	0	0	0	0	0	0	0	9.38681	0	0	0	0	0	0	0	0
A0A0P0V859	A0A0P0V859_ORYSJ	Os01g0749650 protein	Os01g0749650 OSNPB_010749650	Oryza sativa subsp. japonica (Rice)		membrane [GO:0016020]		RESASGGDGALVGR	0.98711	-10.086	0	0	0	0	0	0	0	0	0	0	0	0	0	10.5806	0	0	0	0	0	0	0	0	0	0	0	0	0
A0A0P0V8A1	A0A0P0V8A1_ORYSJ	Os01g0754500 protein	Os01g0754500	Oryza sativa subsp. japonica (Rice)				ASQPVQQYK	0.97536	-34.058	0	0	0	0	0	0	9.253	0	0	0	0	0	0	0	0	0	0	0	0	0	0	0	0	0	0	9.37104	0
A0A0P0V8A9	A0A0P0V8A9_ORYSJ	Os01g0753000 protein	Os01g0753000 OSNPB_010753000	Oryza sativa subsp. japonica (Rice)	positive regulation of DNA-templated transcription [GO:0045893]; positive regulation of long-day photoperiodism, flowering [GO:0048578]	nucleus [GO:0005634]	sequence-specific DNA binding [GO:0043565]	FSGLQSARKEAR	0.97385	-3.4819	0	0	0	0	0	0	0	0	0	0	0	0	0	0	0	0	0	0	0	0	0	0	0	0	0	0	0
A0A0P0V8D9	A0A0P0V8D9_ORYSJ	Os01g0757800 protein	Os01g0757800 OSNPB_010757800	Oryza sativa subsp. japonica (Rice)	DNA repair [GO:0006281]		damaged DNA binding [GO:0003684]	FPSKSCPLRYGTVK	0.98391	-13.822	0	0	0	0	0	0	0	0	0	0	0	0	0	0	0	0	0	0	0	0	0	0	0	0	0	0	0
A0A0P0V8E7	A0A0P0V8E7_ORYSJ	Os01g0761600 protein	Os01g0761600 OSNPB_010761600	Oryza sativa subsp. japonica (Rice)				TVQPPQPVRR	0.97895	-6.8113	0	0	0	0	0	0	0	0	0	0	0	0	0	0	0	0	0	0	0	0	0	0	0	0	0	0	0
A0A0P0V8H7	A0A0P0V8H7_ORYSJ	Os01g0757900 protein	Os01g0757900 OSNPB_010757900	Oryza sativa subsp. japonica (Rice)	glycerol biosynthetic process [GO:0006114]		glycerol-3-phosphatase activity [GO:0043136]; phosphatase activity [GO:0016791]	RNIDHKLLK	0.97074	-2.4684	0	0	0	0	0	0	0	0	0	0	0	0	0	0	0	0	0	0	0	0	0	0	9.70084	0	0	0	0
A0A0P0V8I5	A0A0P0V8I5_ORYSJ	Mitochondrial import inner membrane translocase subunit TIM50	Os01g0762400 OSNPB_010762400	Oryza sativa subsp. japonica (Rice)	protein import into mitochondrial matrix [GO:0030150]	nucleus [GO:0005634]; TIM23 mitochondrial import inner membrane translocase complex [GO:0005744]		EHQRRMQEQK	0.97785	-18.96	0	0	0	0	0	0	0	0	0	0	0	0	0	0	0	0	0	0	0	0	0	0	0	0	0	0	0
A0A0P0V8J2	A0A0P0V8J2_ORYSJ	Os01g0760800 protein	Os01g0760800 OSNPB_010760800	Oryza sativa subsp. japonica (Rice)		nucleus [GO:0005634]	DNA binding [GO:0003677]; DNA-binding transcription factor activity, RNA polymerase II-specific [GO:0000981]	TQIKERHENSLLK	0.98646	-9.2834	0	0	0	0	0	0	0	0	0	0	0	0	0	0	0	0	0	13.9909	0	0	0	0	0	0	0	0	0
A0A0P0V8K0	A0A0P0V8K0_ORYSJ	Os01g0763850 protein	Os01g0763850 OSNPB_010763850	Oryza sativa subsp. japonica (Rice)				RLLTTHARTH	0.97864	-6.8113	0	0	0	0	0	0	0	0	0	0	0	0	0	0	0	0	0	0	0	0	0	0	0	0	0	0	0
A0A0P0V8M9	A0A0P0V8M9_ORYSJ	Os01g0767966 protein	Os01g0767966 OSNPB_010767966	Oryza sativa subsp. japonica (Rice)				MLLSALSLLNALR	0.98552	-13.018	0	0	0	0	0	0	0	0	11.819	0	0	0	0	0	0	0	0	0	0	0	0	0	0	0	0	0	0
A0A0P0V8R2	A0A0P0V8R2_ORYSJ	Os01g0769000 protein	Os01g0769000 OSNPB_010769000	Oryza sativa subsp. japonica (Rice)	deadenylation-dependent decapping of nuclear-transcribed mRNA [GO:0000290]	cytoplasm [GO:0005737]		LLSRYLRLLTPGSELTR	0.98119	-10.57	0	0	11.7308	0	0	0	0	0	0	0	0	0	0	0	0	0	0	0	0	0	0	0	0	0	0	0	0
A0A0P0V8R4	A0A0P0V8R4_ORYSJ	ubiquitinyl hydrolase 1 (EC 3.4.19.12)	Os01g0771400 OSNPB_010771400	Oryza sativa subsp. japonica (Rice)	protein deubiquitination [GO:0016579]; regulation of protein stability [GO:0031647]; ubiquitin-dependent protein catabolic process [GO:0006511]	cytosol [GO:0005829]; nucleus [GO:0005634]	cysteine-type deubiquitinase activity [GO:0004843]; cysteine-type endopeptidase activity [GO:0004197]	LFEVYKNKIR	0.98358	-8.7905	0	0	0	0	0	0	0	0	0	0	0	0	0	0	0	0	0	0	17.3109	0	0	0	0	0	0	0	0
A0A0P0V8R7	A0A0P0V8R7_ORYSJ	Os01g0775750 protein	Os01g0775750 OSNPB_010775750	Oryza sativa subsp. japonica (Rice)				LVHSRCSHRR	0.97935	-8.0221	0	0	0	0	0	0	0	0	0	0	0	0	0	0	0	0	0	0	0	9.41085	0	9.58946	0	0	0	0	0
A0A0P0V8T3	A0A0P0V8T3_ORYSJ	Os01g0771600 protein	Os01g0771600 OSNPB_010771600	Oryza sativa subsp. japonica (Rice)		membrane [GO:0016020]		RHERVSLEVQVR	0.98556	-7.7702	0	0	0	0	0	0	0	0	0	0	0	0	0	0	0	0	0	0	0	0	13.9905	0	0	0	0	0	0
A0A0P0V8W2	A0A0P0V8W2_ORYSJ	Inositol hexakisphosphate and diphosphoinositol-pentakisphosphate kinase (EC 2.7.4.24)	Os01g0777700 OSNPB_010777700	Oryza sativa subsp. japonica (Rice)	inositol metabolic process [GO:0006020]; inositol phosphate biosynthetic process [GO:0032958]; phosphorylation [GO:0016310]	cytosol [GO:0005829]	ATP binding [GO:0005524]; diphosphoinositol-pentakisphosphate kinase activity [GO:0033857]; inositol heptakisphosphate kinase activity [GO:0000829]; inositol hexakisphosphate 1-kinase activity [GO:0052723]; inositol hexakisphosphate 3-kinase activity [GO:0052724]; inositol hexakisphosphate 5-kinase activity [GO:0000832]; inositol hexakisphosphate kinase activity [GO:0000828]; inositol-1,3,4,5,6-p…	LFGVPVPTYAVVRR	0.98428	-12.554	0	0	0	0	0	0	0	0	0	0	0	13.8148	0	0	0	9.42009	0	0	0	0	0	0	0	0	0	0	0
A0A0P0V8W8	A0A0P0V8W8_ORYSJ	Os01g0777450 protein (Os01g0777650 protein)	Os01g0777450 Os01g0777650 OSNPB_010777450 OSNPB_010777650	Oryza sativa subsp. japonica (Rice)				HLTFHLK	0.98155	-6.3935	0	0	0	0	0	0	0	0	0	0	0	0	0	0	0	0	0	0	0	0	0	10.7289	0	0	0	0	0
A0A0P0V904	A0A0P0V904_ORYSJ	Os01g0779001 protein	Os01g0779001 OSNPB_010779001	Oryza sativa subsp. japonica (Rice)				DKGEDKIE	0.98118	-1.7021	0	0	0	0	0	0	0	0	0	0	0	0	0	0	0	0	0	0	0	0	0	0	0	0	0	0	9.63256
A0A0P0V908	A0A0P0V908_ORYSJ	Os01g0784833 protein	Os01g0784833 OSNPB_010784833	Oryza sativa subsp. japonica (Rice)				EPKQDSISLSK	0.96936	-2.5459	0	0	0	0	0	0	0	0	0	0	0	0	0	0	0	0	0	0	11.3578	11.0374	11.4799	0	0	0	0	0	0
A0A0P0V913	A0A0P0V913_ORYSJ	Os01g0784450 protein	Os01g0784450 OSNPB_010784450	Oryza sativa subsp. japonica (Rice)				HAGVHRRLR	0.96757	-1.3911	0	0	0	0	0	0	0	0	0	0	0	0	0	0	0	0	0	0	0	0	0	0	0	0	0	0	0
A0A0P0V934	A0A0P0V934_ORYSJ	Os01g0787101 protein	Os01g0787101 OSNPB_010787101	Oryza sativa subsp. japonica (Rice)				VRAPRVHVHVR	0.98038	-8.0623	12.0827	0	0	0	11.3354	0	0	0	0	0	0	0	0	0	0	0	0	0	0	0	0	0	0	0	0	0	0
A0A0P0V937	A0A0P0V937_ORYSJ	Os01g0783851 protein	Os01g0783851 OSNPB_010783851	Oryza sativa subsp. japonica (Rice)				HIRLNRENALHGILR	0.96904	-1.2684	0	0	0	0	0	0	0	0	0	0	0	0	0	0	0	0	0	0	0	0	0	0	0	0	0	0	0
A0A0P0V946	A0A0P0V946_ORYSJ	Os01g0784101 protein	Os01g0784101 OSNPB_010784101	Oryza sativa subsp. japonica (Rice)				GVGRARPRR	0.98434	-8.1857	0	0	0	8.79201	8.66576	0	0	0	0	0	0	11.3254	0	0	0	9.15484	0	0	0	0	0	0	0	0	0	0	0
A0A0P0V947	A0A0P0V947_ORYSJ	Os01g0793701 protein	Os01g0793701 OSNPB_010793701	Oryza sativa subsp. japonica (Rice)				LVLVEAGALPLQPR	0.96924	-1.334	0	0	0	0	0	0	0	0	0	0	0	0	0	0	0	0	0	0	0	0	0	8.96116	0	0	0	0	0
A0A0P0V970	A0A0P0V970_ORYSJ	Os01g0796000 protein	Os01g0796000 OSNPB_010796000	Oryza sativa subsp. japonica (Rice)				RRPCSGS	1.0034	-0.00052908	0	0	0	0	0	0	0	0	0	0	0	0	0	0	0	0	0	0	0	0	0	0	0	0	0	0	0
A0A0P0V975	A0A0P0V975_ORYSJ	Os01g0795250 protein	Os01g0795250 OSNPB_010795250	Oryza sativa subsp. japonica (Rice)				GPDFLAWWVVK	0.9751	-23.803	0	10.2118	0	0	0	0	8.90797	0	0	10.0344	0	0	0	0	0	0	0	0	0	0	0	0	0	0	0	0	0
A0A0P0V9C6	A0A0P0V9C6_ORYSJ	Os01g0805600 protein	Os01g0805600 OSNPB_010805600	Oryza sativa subsp. japonica (Rice)	cell division [GO:0051301]; mitotic cell cycle phase transition [GO:0044772]		cyclin-dependent protein serine/threonine kinase regulator activity [GO:0016538]	VINTLTSVLTARSK	0.98517	-11.787	0	0	0	0	0	0	10.0542	0	0	0	0	0	0	0	0	0	0	0	0	0	0	0	0	0	0	0	0
A0A0P0V9D0	A0A0P0V9D0_ORYSJ	Os01g0807133 protein	Os01g0807133 OSNPB_010807133	Oryza sativa subsp. japonica (Rice)				NLCRHLEQRR	0.97322	-3.2084	9.80289	0	0	0	0	0	0	0	0	0	0	0	0	0	0	0	0	0	0	0	0	0	0	0	0	0	0
A0A0P0V9E2	A0A0P0V9E2_ORYSJ	Os01g0800250 protein	Os01g0800250 OSNPB_010800250	Oryza sativa subsp. japonica (Rice)				RLPADAEAAR	0.97912	-6.8113	0	0	0	0	0	0	0	0	0	0	0	0	0	9.91308	0	0	0	0	0	0	0	0	0	0	0	0	0
A0A0P0V9F1	A0A0P0V9F1_ORYSJ	Os01g0810500 protein	Os01g0810500 OSNPB_010810500	Oryza sativa subsp. japonica (Rice)	protein phosphorylation [GO:0006468]	membrane [GO:0016020]	ATP binding [GO:0005524]; protein serine/threonine kinase activity [GO:0004674]	LSGWINPSFR	0.98618	-9.8409	0	0	0	0	0	0	11.9478	0	0	0	0	0	0	0	0	0	12.2582	0	0	0	0	0	0	0	0	0	0
A0A0P0V9I4	A0A0P0V9I4_ORYSJ	Os01g0803250 protein	Os01g0803250 OSNPB_010803250	Oryza sativa subsp. japonica (Rice)				SPPETDR	0.9695	-2.0335	0	14.0243	0	0	0	0	0	0	0	0	0	0	0	0	0	0	0	0	0	0	0	0	0	0	10.8878	0	0
A0A0P0V9I8	A0A0P0V9I8_ORYSJ	Os01g0815100 protein	Os01g0815100 OSNPB_010815100	Oryza sativa subsp. japonica (Rice)		membrane [GO:0016020]		ELEAELRKMAPPNGR	0.97781	-19.984	0	0	0	0	0	0	0	0	0	0	0	0	0	0	0	0	0	0	12.1449	0	0	0	0	0	15.62	0	0
A0A0P0V9L7	A0A0P0V9L7_ORYSJ	Os01g0819300 protein	Os01g0819300 OSNPB_010819300	Oryza sativa subsp. japonica (Rice)		endoplasmic reticulum [GO:0005783]	lipid binding [GO:0008289]	TAQDIANPIIAEN	0.98525	-9.2834	0	0	0	0	0	0	0	0	0	0	0	0	0	0	0	0	0	0	0	0	0	0	0	0	0	0	0
A0A0P0V9P0	A0A0P0V9P0_ORYSJ	Os01g0817500 protein	Os01g0817500 OSNPB_010817500	Oryza sativa subsp. japonica (Rice)				HGNLGWLAGGVADGR	0.97451	-1.2683	0	0	0	0	0	0	0	0	0	0	0	0	0	0	0	0	0	0	0	0	0	0	0	0	10.4862	0	0
A0A0P0V9P4	A0A0P0V9P4_ORYSJ	Os01g0820050 protein	Os01g0820050 OSNPB_010820050	Oryza sativa subsp. japonica (Rice)				EAAALAVERLEAEEQR	0.97582	-3.8141	0	0	0	0	0	0	0	0	0	0	0	0	0	0	0	0	0	0	0	0	0	0	0	0	0	12.7924	0
A0A0P0V9Q7	A0A0P0V9Q7_ORYSJ	Os01g0824634 protein	Os01g0824634 OSNPB_010824634	Oryza sativa subsp. japonica (Rice)				GFVFPPRVPFWQVVLR	0.98429	-10.687	0	0	0	0	0	0	0	0	0	0	0	0	8.56605	0	0	0	0	0	0	0	0	0	0	0	9.42738	0	0
A0A0P0V9R1	A0A0P0V9R1_ORYSJ	Os01g0820000 protein	Os01g0820000 OSNPB_010820000	Oryza sativa subsp. japonica (Rice)			heme binding [GO:0020037]; iron ion binding [GO:0005506]; monooxygenase activity [GO:0004497]; oxidoreductase activity, acting on paired donors, with incorporation or reduction of molecular oxygen [GO:0016705]	DFFLEERK	0.98456	-1.7021	0	0	0	0	0	0	0	0	0	0	0	0	0	0	0	0	0	0	0	0	0	0	0	0	0	0	0
A0A0P0V9S7	A0A0P0V9S7_ORYSJ	Os01g0823400 protein	Os01g0823400 OSNPB_010823400	Oryza sativa subsp. japonica (Rice)		membrane [GO:0016020]		RPRVRAPAR	0.97422	-2.4684	0	0	0	0	0	0	8.57565	0	0	0	0	0	0	0	0	0	0	0	0	0	0	0	0	0	0	0	0
A0A0P0V9T4	A0A0P0V9T4_ORYSJ	Os01g0823150 protein	Os01g0823150 OSNPB_010823150	Oryza sativa subsp. japonica (Rice)				AVVEQHRAQRR	0.97335	-3.1204	13.2744	0	0	0	0	0	0	0	0	0	0	0	0	0	0	0	0	0	0	0	0	0	0	0	0	0	0
A0A0P0V9V0	A0A0P0V9V0_ORYSJ	Os01g0824000 protein	Os01g0824000 OSNPB_010824000	Oryza sativa subsp. japonica (Rice)				AGQQQPHR	0.97603	-3.735	0	0	0	0	0	0	0	0	0	0	0	0	0	0	0	0	0	0	10.4718	0	0	0	0	0	0	0	0
A0A0P0V9V4	A0A0P0V9V4_ORYSJ	Os01g0833000 protein (Putative PPR protein)	Os01g0833000 P0460C04.13	Oryza sativa subsp. japonica (Rice)				SACRAGMLR	0.98384	-11.313	0	0	12.647	0	0	0	0	0	0	0	0	0	0	0	0	0	0	0	0	0	0	0	0	0	0	0	0
A0A0P0V9V5	A0A0P0V9V5_ORYSJ	Os01g0831250 protein	Os01g0831250 OSNPB_010831250	Oryza sativa subsp. japonica (Rice)				GRVRVQR	0.9842	-14.192	0	0	0	0	0	0	0	0	10.2708	0	0	0	0	0	0	0	0	0	0	0	0	0	0	0	0	0	0
A0A0P0V9X0	A0A0P0V9X0_ORYSJ	Os01g0826651 protein	Os01g0826651 OSNPB_010826651	Oryza sativa subsp. japonica (Rice)				VDLKTSEIILKDR	0.9859	-11.829	0	0	0	0	0	8.54028	0	0	0	0	0	0	0	0	0	0	0	0	0	0	0	0	0	0	0	0	0
A0A0P0VA14	A0A0P0VA14_ORYSJ	Os01g0831950 protein	Os01g0831950 OSNPB_010831950	Oryza sativa subsp. japonica (Rice)		membrane [GO:0016020]		ALHQEVLRQR	0.98285	-10.293	0	0	0	0	0	0	0	0	0	0	0	0	0	0	0	0	9.62372	0	0	0	0	0	0	0	0	0	0
A0A0P0VA20	A0A0P0VA20_ORYSJ	Os01g0834600 protein	Os01g0834600 OSNPB_010834600	Oryza sativa subsp. japonica (Rice)	translation [GO:0006412]	cytosolic small ribosomal subunit [GO:0022627]; ribosome [GO:0005840]	structural constituent of ribosome [GO:0003735]	GHAVGDIPGVRFKVVK	0.9836	-10.686	0	0	0	0	0	0	0	0	0	0	0	0	0	0	9.02389	0	0	0	0	0	0	0	0	0	0	0	0
A0A0P0VA22	A0A0P0VA22_ORYSJ	UDP-glucuronate decarboxylase (EC 4.1.1.35)	Os01g0837300 OSNPB_010837300	Oryza sativa subsp. japonica (Rice)	D-xylose metabolic process [GO:0042732]; UDP-D-xylose biosynthetic process [GO:0033320]		NAD+ binding [GO:0070403]; UDP-glucuronate decarboxylase activity [GO:0048040]	WEPKVSLREGLPLMVK	0.98549	-12.387	0	0	0	0	0	0	0	0	0	0	0	0	0	0	0	0	0	0	0	0	0	0	0	0	0	0	0
A0A0P0VA52	A0A0P0VA52_ORYSJ	Dirigent protein	Os01g0837400 OsJ_04004 OSNPB_010837400 P0506B12.42	Oryza sativa subsp. japonica (Rice)	phenylpropanoid biosynthetic process [GO:0009699]	apoplast [GO:0048046]		AEMQAQTRR	0.97282	-2.4684	0	0	0	0	0	0	0	0	0	0	0	0	0	0	0	0	0	0	0	0	0	9.47263	0	0	0	0	0
A0A0P0VA72	A0A0P0VA72_ORYSJ	Pectate lyase (EC 4.2.2.2)	Os01g0837100 OSNPB_010837100	Oryza sativa subsp. japonica (Rice)	pectin catabolic process [GO:0045490]		metal ion binding [GO:0046872]; pectate lyase activity [GO:0030570]	HRRPPRRPNGSR	0.98599	-7.7702	0	0	0	0	0	0	0	0	0	0	0	0	15.367	0	0	0	0	0	0	0	0	0	0	0	0	0	0
A0A0P0VAA1	A0A0P0VAA1_ORYSJ	Os01g0846700 protein	Os01g0846700 OSNPB_010846700	Oryza sativa subsp. japonica (Rice)				GGGGGEGVGLVGVGK	0.98368	-14.435	0	0	0	0	0	0	0	0	0	0	0	0	0	0	0	0	0	0	0	0	0	0	0	0	0	0	0
A0A0P0VAC7	A0A0P0VAC7_ORYSJ	Protein FAR1-RELATED SEQUENCE	Os01g0849800 OSNPB_010849800	Oryza sativa subsp. japonica (Rice)	regulation of DNA-templated transcription [GO:0006355]	nucleus [GO:0005634]	zinc ion binding [GO:0008270]	CHTFKKAFHK	0.97955	-6.8113	15.6761	0	0	0	11.0378	0	0	0	0	0	0	0	0	0	0	0	0	0	0	0	0	0	0	0	0	0	0
A0A0P0VAC8	A0A0P0VAC8_ORYSJ	Os01g0840700 protein	Os01g0840700 OSNPB_010840700	Oryza sativa subsp. japonica (Rice)	translation [GO:0006412]	ribonucleoprotein complex [GO:1990904]; ribosome [GO:0005840]	structural constituent of ribosome [GO:0003735]	RKLGTHK	1.0455	-0.00052908	0	0	0	0	0	0	0	0	0	0	0	0	0	0	0	0	0	0	0	0	0	0	10.0045	0	0	0	0
A0A0P0VAD6	A0A0P0VAD6_ORYSJ	Os01g0846450 protein	Os01g0846450 OSNPB_010846450	Oryza sativa subsp. japonica (Rice)	RNA 3' uridylation [GO:0071076]; RNA 3'-end processing [GO:0031123]	membrane [GO:0016020]	nucleotidyltransferase activity [GO:0016779]; RNA uridylyltransferase activity [GO:0050265]	EWAKAQNINDPK	0.98721	-7.7702	0	0	0	13.4107	0	0	0	0	0	0	0	0	0	0	0	0	0	0	0	0	0	0	0	0	0	0	0
A0A0P0VAE1	A0A0P0VAE1_ORYSJ	Os01g0848766 protein	Os01g0848766 OSNPB_010848766	Oryza sativa subsp. japonica (Rice)				RERMLDLPTPESPMR	0.97613	-1.2684	0	0	0	0	0	0	0	0	0	0	0	0	0	0	0	0	0	0	0	0	0	0	0	0	0	0	0
A0A0P0VAE6	A0A0P0VAE6_ORYSJ	Os01g0852200 protein	Os01g0852200 OSNPB_010852200	Oryza sativa subsp. japonica (Rice)		membrane [GO:0016020]	transmembrane transporter activity [GO:0022857]	RYDRHHR	0.97713	-3.7361	0	0	0	9.13648	0	0	0	0	0	0	0	0	0	0	0	0	0	0	0	0	0	0	0	0	0	0	9.13868
A0A0P0VAG6	A0A0P0VAG6_ORYSJ	Os01g0855000 protein	Os01g0855000 OSNPB_010855000	Oryza sativa subsp. japonica (Rice)				VSDMLDITKK	0.97667	-6.8113	0	0	0	0	0	0	0	0	0	0	0	0	0	0	0	0	0	0	0	0	0	0	0	0	0	0	0
A0A0P0VAL9	A0A0P0VAL9_ORYSJ	Os01g0857950 protein	Os01g0857950 OSNPB_010857950	Oryza sativa subsp. japonica (Rice)				MPCLGFWVEKCKFR	0.98623	-10.086	0	0	0	0	0	0	0	0	0	0	0	0	0	0	0	0	0	0	10.3993	0	0	0	0	0	0	0	0
A0A0P0VAP1	A0A0P0VAP1_ORYSJ	Os01g0862200 protein	Os01g0862200 OSNPB_010862200	Oryza sativa subsp. japonica (Rice)				TSCWSSGER	0.97567	-4.5014	0	0	0	0	0	0	0	0	0	0	0	0	0	0	0	0	0	0	0	0	0	0	0	0	0	0	0
A0A0P0VAQ4	A0A0P0VAQ4_ORYSJ	Os01g0861200 protein	Os01g0861200 OSNPB_010861200	Oryza sativa subsp. japonica (Rice)				LSKPAISSIVGFNER	0.98418	-10.701	0	0	0	0	0	0	0	0	0	0	0	0	0	0	0	0	0	0	0	0	0	0	0	0	0	0	0
A0A0P0VAU3	A0A0P0VAU3_ORYSJ	RING-type E3 ubiquitin transferase (EC 2.3.2.27)	Os01g0866000	Oryza sativa subsp. japonica (Rice)	protein ubiquitination [GO:0016567]	membrane [GO:0016020]	transferase activity [GO:0016740]	VLEGGAAAAAR	0.98426	-14.332	0	0	0	0	0	0	0	0	0	0	0	0	0	10.51	0	0	0	0	0	0	0	0	0	0	0	0	0
A0A0P0VAU6	A0A0P0VAU6_ORYSJ	Os01g0869000 protein	Os01g0869000 OSNPB_010869000	Oryza sativa subsp. japonica (Rice)				CCFRYLSR	0.9746	-1.7021	0	0	0	0	0	0	0	0	0	0	11.1856	0	0	0	0	0	0	0	0	0	0	0	0	0	0	0	0
A0A0P0VAZ3	A0A0P0VAZ3_ORYSJ	Os01g0867800 protein	Os01g0867800 OSNPB_010867800	Oryza sativa subsp. japonica (Rice)			RNA binding [GO:0003723]	GAMLFGKK	0.98599	-11.797	0	0	0	0	0	0	9.24415	0	0	0	0	0	0	0	0	0	0	0	0	0	0	0	0	0	10.0527	0	0
A0A0P0VAZ4	A0A0P0VAZ4_ORYSJ	Os01g0872350 protein	Os01g0872350 OSNPB_010872350	Oryza sativa subsp. japonica (Rice)				WHGTSPCRAGR	0.97194	-3.1203	0	0	0	0	0	0	0	0	0	0	0	0	0	0	0	0	0	0	0	0	0	0	0	0	0	0	0
A0A0P0VB02	A0A0P0VB02_ORYSJ	Os01g0870300 protein	Os01g0870300 OSNPB_010870300	Oryza sativa subsp. japonica (Rice)	double-strand break repair via homologous recombination [GO:0000724]	Rad51B-Rad51C-Rad51D-XRCC2 complex [GO:0033063]; replication fork [GO:0005657]	ATP binding [GO:0005524]; ATP-dependent DNA damage sensor activity [GO:0140664]; DNA binding [GO:0003677]	FDVLRLAQILR	0.98248	-8.0623	0	0	0	0	0	0	0	0	0	0	0	0	0	0	0	0	0	0	0	0	0	0	0	0	0	0	0
A0A0P0VB03	A0A0P0VB03_ORYSJ	Os01g0876650 protein	Os01g0876650 OSNPB_010876650	Oryza sativa subsp. japonica (Rice)				LCLVAWR	0.96817	-2.0335	0	0	0	0	0	0	0	10.1956	0	0	0	0	0	0	0	0	0	0	0	0	0	0	0	0	0	0	0
A0A0P0VB07	A0A0P0VB07_ORYSJ	Os01g0869450 protein	Os01g0869450 OSNPB_010869450	Oryza sativa subsp. japonica (Rice)				GPVAEHVRLR	0.97941	-6.8113	0	0	0	0	0	0	0	0	0	0	0	0	0	11.1593	0	0	0	0	0	0	0	0	0	0	0	0	0
A0A0P0VB32	A0A0P0VB32_ORYSJ	Os01g0878300 protein	Os01g0878300 OSNPB_010878300	Oryza sativa subsp. japonica (Rice)	protein phosphorylation [GO:0006468]	membrane [GO:0016020]	ATP binding [GO:0005524]; protein kinase activity [GO:0004672]	ISQNQFTGR	0.96862	-2.7229	0	0	0	0	0	9.24726	0	0	0	0	0	0	0	0	0	0	0	0	0	0	0	0	0	0	0	0	0
A0A0P0VB44	A0A0P0VB44_ORYSJ	Os01g0878750 protein	Os01g0878750 OSNPB_010878750	Oryza sativa subsp. japonica (Rice)				EGDVPER	0.97439	-29.733	0	0	13.9402	0	0	0	0	0	0	0	0	0	0	0	0	0	0	0	0	0	0	0	0	0	0	0	14.3313
A0A0P0VB53	A0A0P0VB53_ORYSJ	Os01g0880350 protein	Os01g0880350 OSNPB_010880350	Oryza sativa subsp. japonica (Rice)				EHAWKQIR	0.9734	-1.7021	0	0	0	0	0	0	0	0	0	0	12.5283	0	0	0	0	0	0	0	0	0	0	0	0	0	0	0	0
A0A0P0VB56	A0A0P0VB56_ORYSJ	Os01g0875700 protein (Putative DnaJ-like protein)	Os01g0875700 P0698A10.28	Oryza sativa subsp. japonica (Rice)	protein folding [GO:0006457]	endoplasmic reticulum [GO:0005783]	unfolded protein binding [GO:0051082]	DVVTKNGSIVK	0.98066	-16.366	0	0	0	0	0	0	0	0	0	0	0	0	0	0	0	0	0	0	0	0	0	11.3347	0	0	0	11.9662	0
A0A0P0VB69	A0A0P0VB69_ORYSJ	Os01g0873500 protein	Os01g0873500 OSNPB_010873500	Oryza sativa subsp. japonica (Rice)				GNGNGGK	1.0365	-0.00052908	0	0	0	0	0	0	0	0	0	0	9.33981	0	0	0	0	0	0	0	0	0	0	0	0	0	0	0	0
A0A0P0VB90	A0A0P0VB90_ORYSJ	Os01g0881800 protein	Os01g0881800 OSNPB_010881800	Oryza sativa subsp. japonica (Rice)				GGAQPGHRR	0.97252	-2.4684	0	0	0	0	0	0	0	0	0	0	0	0	0	0	0	0	0	10.7625	0	0	0	0	0	0	0	0	0
A0A0P0VBB5	A0A0P0VBB5_ORYSJ	RING-type E3 ubiquitin transferase (EC 2.3.2.27)	Os01g0884400 OSNPB_010884400	Oryza sativa subsp. japonica (Rice)		cytoplasm [GO:0005737]; nucleus [GO:0005634]	ubiquitin-protein transferase activity [GO:0004842]	SATGELR	0.97411	-3.2087	0	0	0	0	0	0	0	0	0	0	0	0	0	0	0	0	0	0	0	0	8.69471	0	0	0	0	0	0
A0A0P0VBB9	A0A0P0VBB9_ORYSJ	Os01g0881000 protein	Os01g0881000 OSNPB_010881000	Oryza sativa subsp. japonica (Rice)	chromatin remodeling [GO:0006338]	chromatin [GO:0000785]; nucleus [GO:0005634]	ATP binding [GO:0005524]; ATP hydrolysis activity [GO:0016887]; ATP-dependent chromatin remodeler activity [GO:0140658]; chromatin binding [GO:0003682]; DNA binding [GO:0003677]; helicase activity [GO:0004386]; histone binding [GO:0042393]; metal ion binding [GO:0046872]	EVYSEDQRK	0.97514	-33.505	12.0716	0	11.6145	0	0	0	0	0	0	0	0	0	0	10.0623	11.5406	0	0	0	0	0	0	0	0	0	0	0	0
A0A0P0VBD8	A0A0P0VBD8_ORYSJ	Os01g0883850 protein	Os01g0883850 OSNPB_010883850	Oryza sativa subsp. japonica (Rice)				TRRPPAPRR	0.97409	-2.4684	0	0	0	0	0	0	0	0	10.8404	0	0	0	0	0	0	0	0	0	0	0	0	0	0	0	0	0	0
A0A0P0VBE3	A0A0P0VBE3_ORYSJ	Os01g0888022 protein	Os01g0888022 OSNPB_010888022	Oryza sativa subsp. japonica (Rice)				RSGLPLASR	0.97233	-2.4684	0	0	0	10.6275	0	0	0	0	0	0	0	0	0	0	0	0	0	0	0	0	0	0	0	0	0	0	0
A0A0P0VBF4	A0A0P0VBF4_ORYSJ	Os01g0886900 protein	Os01g0886900 OSNPB_010886900	Oryza sativa subsp. japonica (Rice)				AAGMAPTVGIKR	0.98642	-12.066	0	0	0	0	0	0	0	0	0	0	0	0	0	0	0	0	0	0	0	0	0	0	0	0	0	0	0
A0A0P0VBK4	A0A0P0VBK4_ORYSJ	Os01g0897800 protein	Os01g0897800 OSNPB_010897800	Oryza sativa subsp. japonica (Rice)	sister chromatid cohesion [GO:0007062]	cohesin complex [GO:0008278]; nucleus [GO:0005634]		KGPLGTIWIAAHLER	0.9808	-0.36998	0	0	0	0	0	0	0	0	0	0	0	0	0	0	0	0	0	0	15.2784	0	0	0	0	0	0	15.0993	0
A0A0P0VBL0	A0A0P0VBL0_ORYSJ	Os01g0894000 protein	Os01g0894000 OSNPB_010894000	Oryza sativa subsp. japonica (Rice)			hydrolase activity [GO:0016787]	FMQRATASRDFK	0.98427	-13.924	0	0	0	0	0	0	0	0	0	10.1346	0	0	0	0	0	0	0	0	0	0	0	0	0	0	0	0	0
A0A0P0VBM0	A0A0P0VBM0_ORYSJ	Os01g0892800 protein	Os01g0892800 OSNPB_010892800	Oryza sativa subsp. japonica (Rice)	protein phosphorylation [GO:0006468]		ATP binding [GO:0005524]; protein kinase activity [GO:0004672]	HELTVLEKVR	0.98221	-15.656	10.1466	0	0	0	0	0	0	0	0	0	0	0	0	0	0	0	0	0	0	0	0	9.65983	0	0	0	0	13.7262
A0A0P0VBS0	A0A0P0VBS0_ORYSJ	Os01g0901650 protein	Os01g0901650 OSNPB_010901650	Oryza sativa subsp. japonica (Rice)				LHARRKPPHR	0.97696	-6.8113	0	0	0	0	0	0	0	0	0	0	0	0	0	0	0	0	0	0	0	0	0	0	0	0	0	0	0
A0A0P0VBT0	A0A0P0VBT0_ORYSJ	Os01g0902750 protein	Os01g0902750 OSNPB_010902750	Oryza sativa subsp. japonica (Rice)				AAPRRLATPVR	0.97784	-18.148	0	0	0	0	0	0	0	0	0	0	0	0	0	0	11.2226	0	0	0	0	0	0	11.7766	0	0	0	0	0
A0A0P0VBU5	A0A0P0VBU5_ORYSJ	Os01g0910400 protein	Os01g0910400 OSNPB_010910400	Oryza sativa subsp. japonica (Rice)		membrane [GO:0016020]		NVKACHSSGLPR	0.98311	-10.979	0	0	11.7478	0	0	0	0	0	0	0	0	0	0	0	0	0	0	0	0	0	0	0	0	0	0	0	0
A0A0P0VC00	A0A0P0VC00_ORYSJ	Os01g0911000 protein	Os01g0911000 OSNPB_010911000	Oryza sativa subsp. japonica (Rice)				WMRKELHGLR	0.97758	-6.8113	0	0	0	0	0	0	0	0	0	0	0	0	0	0	0	0	0	0	0	0	10.5361	0	0	0	0	0	0
A0A0P0VC15	A0A0P0VC15_ORYSJ	Os01g0911100 protein	Os01g0911100 OSNPB_010911100	Oryza sativa subsp. japonica (Rice)			ATP binding [GO:0005524]; hydrolase activity [GO:0016787]; mRNA binding [GO:0003729]; RNA helicase activity [GO:0003724]	ILIFFQTKKDCDK	0.97654	-21.007	0	0	0	0	0	0	0	0	0	0	0	0	0	0	12.9786	0	0	0	0	0	0	0	0	0	0	0	0
A0A0P0VC23	A0A0P0VC23_ORYSJ	Os01g0916300 protein	Os01g0916300 OSNPB_010916300	Oryza sativa subsp. japonica (Rice)				GADDLPEFLRQRLR	0.98384	-12.631	0	0	0	0	0	0	0	0	0	0	0	0	0	0	0	0	0	0	0	0	0	0	0	0	0	0	0
A0A0P0VC38	A0A0P0VC38_ORYSJ	Os01g0919900 protein	Os01g0919900 OSNPB_010919900	Oryza sativa subsp. japonica (Rice)	fatty acid biosynthetic process [GO:0006633]	chloroplast [GO:0009507]	acyl-[acyl-carrier-protein] desaturase activity [GO:0045300]; metal ion binding [GO:0046872]	HETAYTK	1.0878	-0.00052908	0	0	0	0	0	0	0	0	0	0	0	0	0	0	0	0	0	0	0	0	0	0	0	0	0	0	0
A0A0P0VC45	A0A0P0VC45_ORYSJ	Os01g0923700 protein	Os01g0923700 OSNPB_010923700	Oryza sativa subsp. japonica (Rice)		membrane [GO:0016020]		GSLVAHFRGWRVVR	0.98804	-10.086	0	0	0	0	0	0	0	0	0	0	0	0	0	0	0	0	0	0	0	0	0	0	0	0	0	0	0
A0A0P0VC60	A0A0P0VC60_ORYSJ	Exocyst subunit Exo70 family protein	Os01g0922050 OSNPB_010922050	Oryza sativa subsp. japonica (Rice)	exocytosis [GO:0006887]; protein transport [GO:0015031]	exocyst [GO:0000145]	phosphatidylinositol-4,5-bisphosphate binding [GO:0005546]	ELKILIQTRASR	0.97984	-16.6	0	0	0	0	0	0	0	0	0	0	0	0	0	0	0	0	0	0	0	0	9.53358	0	0	0	11.5639	0	0
A0A0P0VC79	A0A0P0VC79_ORYSJ	Mannosyl-oligosaccharide glucosidase (EC 3.2.1.106)	Os01g0921200 OSNPB_010921200	Oryza sativa subsp. japonica (Rice)	oligosaccharide metabolic process [GO:0009311]; protein N-linked glycosylation [GO:0006487]	endoplasmic reticulum membrane [GO:0005789]	Glc3Man9GlcNAc2 oligosaccharide glucosidase activity [GO:0004573]	INRLTGPVLSTR	0.97604	-23.378	0	0	0	0	0	0	0	0	12.2102	0	0	0	0	0	0	0	0	0	0	0	0	0	0	0	0	10.6803	0
A0A0P0VCA6	A0A0P0VCA6_ORYSJ	Os01g0922350 protein	Os01g0922350 OSNPB_010922350	Oryza sativa subsp. japonica (Rice)		membrane [GO:0016020]		EHGALLTLR	0.976	-4.5014	0	0	0	0	0	0	0	0	0	0	0	0	0	0	0	0	0	0	0	0	0	0	0	0	0	0	0
A0A0P0VCD7	A0A0P0VCD7_ORYSJ	Os01g0926450 protein	Os01g0926450 OSNPB_010926450	Oryza sativa subsp. japonica (Rice)				LEAGVVALAERLHQR	0.98398	-10.701	15.0229	0	0	0	0	0	0	0	0	13.861	0	0	0	0	0	0	0	0	0	0	0	0	0	0	0	0	0
A0A0P0VCE8	A0A0P0VCE8_ORYSJ	Os01g0934500 protein	Os01g0934500 OSNPB_010934500	Oryza sativa subsp. japonica (Rice)		membrane [GO:0016020]		CLLLLLLPSISCK	0.94273	-0.00052908	0	0	0	0	0	0	0	0	0	0	0	0	0	0	0	0	0	0	0	0	0	0	0	0	15.0234	0	0
A0A0P0VCF3	A0A0P0VCF3_ORYSJ	Os01g0933600 protein	Os01g0933600 OSNPB_010933600	Oryza sativa subsp. japonica (Rice)				GLTQFPASAAAATAELPR	0.98216	-10.393	0	0	0	0	0	0	0	0	0	0	0	0	0	0	0	0	11.6352	0	0	0	0	0	0	0	0	0	0
A0A0P0VCF9	A0A0P0VCF9_ORYSJ	Os01g0935100 protein	Os01g0935100 OSNPB_010935100	Oryza sativa subsp. japonica (Rice)	regulation of transcription by RNA polymerase II [GO:0006357]	CCAAT-binding factor complex [GO:0016602]	DNA-binding transcription activator activity, RNA polymerase II-specific [GO:0001228]; DNA-binding transcription factor activity, RNA polymerase II-specific [GO:0000981]; protein heterodimerization activity [GO:0046982]; sequence-specific DNA binding [GO:0043565]	DGLPPQAKISKR	0.98787	-9.4717	0	0	0	0	0	0	0	0	0	0	0	0	0	0	0	0	0	0	0	0	0	0	0	0	0	0	0
A0A0P0VCH6	A0A0P0VCH6_ORYSJ	Os01g0923600 protein	Os01g0923600 OSNPB_010923600	Oryza sativa subsp. japonica (Rice)	regulation of DNA-templated transcription [GO:0006355]		calmodulin binding [GO:0005516]; DNA binding [GO:0003677]	VHAEIVQQGVIR	0.98374	-14.05	0	0	0	0	0	0	0	0	0	0	0	0	11.6881	0	0	0	0	0	0	0	0	0	0	0	0	0	0
A0A0P0VCH7	A0A0P0VCH7_ORYSJ	Os01g0936700 protein	Os01g0936700 OSNPB_010936700	Oryza sativa subsp. japonica (Rice)				SSRRLFR	1.0847	-0.00052908	9.8037	0	0	0	0	0	0	0	0	0	0	0	0	0	0	0	0	0	0	0	0	0	0	0	0	0	0
A0A0P0VCJ5	A0A0P0VCJ5_ORYSJ	Os01g0934500 protein	Os01g0934500 OSNPB_010934500	Oryza sativa subsp. japonica (Rice)				FGHLHTLEMA	0.98246	-15.717	0	0	0	0	0	0	0	0	0	0	9.45263	0	0	0	0	0	0	0	0	0	0	0	0	0	0	0	0
A0A0P0VCJ7	A0A0P0VCJ7_ORYSJ	Os01g0936800 protein	Os01g0936800 OSNPB_010936800	Oryza sativa subsp. japonica (Rice)		endoplasmic reticulum membrane [GO:0005789]		EAPILREVPVHISPVR	0.98009	-6.6522	0	0	0	0	0	0	0	9.0555	0	0	0	0	0	0	0	0	0	0	0	0	0	0	0	0	0	0	0
A0A0P0VCL5	A0A0P0VCL5_ORYSJ	Os01g0934300 protein	Os01g0934300 OSNPB_010934300	Oryza sativa subsp. japonica (Rice)				TPLTSIIK	0.97457	-5.6154	0	0	0	0	0	0	0	0	0	0	0	0	11.7467	0	0	0	0	0	0	0	0	0	0	0	0	0	0
A0A0P0VCL9	A0A0P0VCL9_ORYSJ	Potassium transporter	Os01g0935500 OSNPB_010935500	Oryza sativa subsp. japonica (Rice)		membrane [GO:0016020]	potassium ion transmembrane transporter activity [GO:0015079]	IYQALSPYYIVK	0.97952	-7.7702	0	0	0	0	0	0	0	0	0	0	0	0	0	0	0	0	0	0	0	0	0	0	0	0	0	0	0
A0A0P0VCN7	A0A0P0VCN7_ORYSJ	Os01g0937025 protein	Os01g0937025 OSNPB_010937025	Oryza sativa subsp. japonica (Rice)				ELVGDLLRPRHLR	0.98446	-10.986	0	0	0	0	0	0	0	0	0	0	0	0	15.367	0	0	0	0	0	0	0	0	0	0	0	14.2983	0	0
A0A0P0VCP9	A0A0P0VCP9_ORYSJ	Os01g0929967 protein	Os01g0929967 OSNPB_010929967	Oryza sativa subsp. japonica (Rice)				LIVFETIDDGCLHVCALP	0.98239	-10.393	0	0	0	0	0	0	0	0	0	0	0	0	0	9.27331	0	0	0	0	0	0	0	0	0	0	0	0	0
A0A0P0VCR3	A0A0P0VCR3_ORYSJ	Os01g0949050 protein	Os01g0949050 OSNPB_010949050	Oryza sativa subsp. japonica (Rice)				KGTHGSS	0.96137	-0.00052908	0	0	0	0	0	0	0	0	0	0	0	0	0	0	0	8.83112	0	9.06005	8.65732	0	0	8.94448	8.98325	9.34081	8.64386	0	0
A0A0P0VCT8	A0A0P0VCT8_ORYSJ	Os01g0945400 protein	Os01g0945400 OSNPB_010945400	Oryza sativa subsp. japonica (Rice)				RPDRRARPPR	0.97269	-3.2084	0	0	0	0	0	0	0	0	0	0	0	0	0	0	0	0	0	0	0	0	0	10.5844	0	0	0	0	0
A0A0P0VCU2	A0A0P0VCU2_ORYSJ	Os01g0941300 protein	Os01g0941300 OSNPB_010941300	Oryza sativa subsp. japonica (Rice)				NQGAQRQR	0.97139	-1.7026	0	0	0	0	0	12.9594	0	0	0	0	0	0	0	0	0	0	0	0	0	0	0	0	0	0	0	0	0
A0A0P0VCU3	A0A0P0VCU3_ORYSJ	Os01g0944800 protein	Os01g0944800 OSNPB_010944800	Oryza sativa subsp. japonica (Rice)	carbohydrate metabolic process [GO:0005975]	plasma membrane [GO:0005886]	hydrolase activity, hydrolyzing O-glycosyl compounds [GO:0004553]	SNGITDMR	0.97595	-3.735	0	0	0	0	0	0	0	0	0	0	0	0	0	0	0	0	0	0	0	0	0	0	0	0	0	0	0
A0A0P0VCU4	A0A0P0VCU4_ORYSJ	Os01g0944900 protein	Os01g0944900 OSNPB_010944900	Oryza sativa subsp. japonica (Rice)				TPVYPITF	0.97606	-3.735	0	0	0	0	0	0	0	0	0	0	0	0	0	0	0	0	0	0	0	0	0	0	0	0	0	0	0
A0A0P0VCV0	A0A0P0VCV0_ORYSJ	Os01g0942100 protein	Os01g0942100 OSNPB_010942100	Oryza sativa subsp. japonica (Rice)				FVDVVFHQGAFYTVSR	0.98174	-10.686	0	0	0	0	0	0	0	0	0	0	12.1147	0	0	0	0	0	0	0	0	0	0	0	0	0	0	0	0
A0A0P0VCY2	A0A0P0VCY2_ORYSJ	Os01g0950700 protein	Os01g0950700 OSNPB_010950700	Oryza sativa subsp. japonica (Rice)				FSTWFQRR	0.97564	-1.7021	0	0	0	0	0	0	0	0	0	0	0	10.7704	0	0	0	0	0	0	0	0	0	0	0	0	0	0	0
A0A0P0VCY6	A0A0P0VCY6_ORYSJ	Os01g0953100 protein	Os01g0953100	Oryza sativa subsp. japonica (Rice)		membrane [GO:0016020]		AGLRRLWGEWEIR	0.98654	-9.2834	0	0	0	0	0	0	0	0	0	0	0	0	0	0	0	0	0	0	13.8973	0	0	0	0	0	0	0	0
A0A0P0VD00	A0A0P0VD00_ORYSJ	Os01g0949260 protein	Os01g0949260 OSNPB_010949260	Oryza sativa subsp. japonica (Rice)				KEAKEEGDK	0.97396	-2.4684	0	0	0	0	0	0	0	0	0	0	0	0	0	0	0	0	0	0	0	0	0	0	0	0	0	0	0
A0A0P0VD07	A0A0P0VD07_ORYSJ	Os01g0958600 protein	Os01g0958600 OSNPB_010958600	Oryza sativa subsp. japonica (Rice)			hydrolase activity, acting on ester bonds [GO:0016788]	MQALYSVGLRK	0.97993	-8.0623	0	0	0	0	0	0	0	0	0	0	0	0	0	0	0	0	0	0	0	0	0	0	0	0	0	0	0
A0A0P0VD16	A0A0P0VD16_ORYSJ	Os01g0955000 protein (Putative phosphatidylglycerol specific phospholipase C)	B1139B11.14-1 Os01g0955000 OsJ_04801	Oryza sativa subsp. japonica (Rice)			hydrolase activity, acting on ester bonds [GO:0016788]	ELVGEFAVFDR	0.98484	-8.9061	0	0	0	0	0	0	0	0	11.3018	0	0	0	0	0	0	0	0	0	0	0	0	0	0	0	0	0	0
A0A0P0VD24	A0A0P0VD24_ORYSJ	Os01g0957401 protein	Os01g0957401 OSNPB_010957401	Oryza sativa subsp. japonica (Rice)				LEEAIPMVNR	0.9772	-22.751	0	0	0	0	0	0	0	0	0	0	0	0	0	0	0	0	0	0	0	0	0	0	0	0	0	0	0
A0A0P0VD31	A0A0P0VD31_ORYSJ	Os01g0952300 protein	Os01g0952300 OSNPB_010952300	Oryza sativa subsp. japonica (Rice)			metal ion binding [GO:0046872]	LPGGVTKNSK	0.97513	-34.567	0	0	0	0	0	0	0	0	0	0	0	0	0	0	0	0	0	0	0	0	0	0	0	0	10.62	0	0
A0A0P0VD66	A0A0P0VD66_ORYSJ	Os01g0957000 protein	Os01g0957000 OSNPB_010957000	Oryza sativa subsp. japonica (Rice)	NAD metabolic process [GO:0019674]; NADP biosynthetic process [GO:0006741]; phosphorylation [GO:0016310]		NAD+ kinase activity [GO:0003951]	SSHKLVSR	0.9736	-1.7021	0	0	0	0	0	0	0	0	0	0	0	0	0	0	11.1964	0	0	0	0	0	0	0	0	0	0	0	0
A0A0P0VD92	A0A0P0VD92_ORYSJ	beta-galactosidase (EC 3.2.1.23) (Lactase)	Os01g0952600 OSNPB_010952600	Oryza sativa subsp. japonica (Rice)	carbohydrate metabolic process [GO:0005975]; organic substance catabolic process [GO:1901575]	beta-galactosidase complex [GO:0009341]	beta-galactosidase activity [GO:0004565]; carbohydrate binding [GO:0030246]	DLVLMRQNNINAVR	0.98373	-12.631	0	0	13.4656	0	13.4774	0	0	0	0	0	0	0	0	0	0	0	0	0	0	0	0	0	0	0	0	0	0
A0A0P0VDA0	A0A0P0VDA0_ORYSJ	Os01g0967050 protein	Os01g0967050 OSNPB_010967050	Oryza sativa subsp. japonica (Rice)		extracellular region [GO:0005576]		ARLVPSQQQLQQVVR	0.98162	-0.36998	0	0	0	0	0	0	0	0	0	10.48	0	0	0	0	0	0	0	0	0	0	0	0	0	0	0	0	0
A0A0P0VDA3	A0A0P0VDA3_ORYSJ	Os01g0966900 protein	Os01g0966900 OSNPB_010966900	Oryza sativa subsp. japonica (Rice)		membrane [GO:0016020]	carbohydrate transmembrane transporter activity [GO:0015144]; symporter activity [GO:0015293]	RPSKFQPLQVNK	0.98645	-9.4717	0	0	0	0	0	0	0	0	0	0	15.4274	0	0	0	0	0	0	0	0	0	0	0	0	0	0	0	0
A0A0P0VDG2	A0A0P0VDG2_ORYSJ	Phospholipase A1 (EC 3.1.1.-)	Os01g0968500 OSNPB_010968500	Oryza sativa subsp. japonica (Rice)	lipid catabolic process [GO:0016042]		phospholipase A1 activity [GO:0008970]	WREPILWR	0.97059	-1.7021	0	0	0	0	0	0	0	0	0	0	0	0	0	0	0	0	0	0	0	0	0	0	0	0	0	0	0
A0A0P0VDG6	A0A0P0VDG6_ORYSJ	Os01g0968601 protein	Os01g0968601 OSNPB_010968601	Oryza sativa subsp. japonica (Rice)				RAAAPLSRPVR	0.98222	-8.0623	0	0	0	12.0231	0	0	0	0	0	0	0	0	0	0	0	0	0	0	0	0	0	0	0	0	0	0	0
A0A0P0VDI8	A0A0P0VDI8_ORYSJ	Os01g0976900 protein	Os01g0976900 OSNPB_010976900	Oryza sativa subsp. japonica (Rice)	protein phosphorylation [GO:0006468]		ATP binding [GO:0005524]; protein serine/threonine kinase activity [GO:0004674]	EQLQMMSISWLRR	0.98109	-16.119	0	0	0	0	0	0	0	0	0	0	0	0	0	0	0	0	0	0	0	0	10.3496	0	11.4794	0	0	0	0
A0A0P0VDN9	A0A0P0VDN9_ORYSJ	Os02g0103850 protein	Os02g0103850 OSNPB_020103850	Oryza sativa subsp. japonica (Rice)				LTGGVVAGDPRVQEAPPR	0.98577	-11.894	0	0	0	0	0	0	0	0	0	0	0	0	0	0	0	0	0	0	0	0	0	0	0	0	0	0	0
A0A0P0VDP1	A0A0P0VDP1_ORYSJ	Os02g0100250 protein	Os02g0100250 OSNPB_020100250	Oryza sativa subsp. japonica (Rice)				LGHEDAR	0.96126	-2.0335	0	0	0	0	0	0	0	0	0	0	0	0	0	0	0	0	0	0	0	0	0	0	0	0	0	0	0
A0A0P0VDR5	A0A0P0VDR5_ORYSJ	Os02g0108201 protein	Os02g0108201 OSNPB_020108201	Oryza sativa subsp. japonica (Rice)				GGVGLEAISGEGCRWR	0.98592	-12.387	0	0	0	0	0	0	0	0	0	0	0	0	0	0	0	0	0	0	0	0	0	0	0	0	0	0	0
A0A0P0VDU2	A0A0P0VDU2_ORYSJ	Os02g0109600 protein	Os02g0109600 OSNPB_020109600	Oryza sativa subsp. japonica (Rice)				KDSPDVIFLGEK	0.97634	-23.322	0	0	0	0	0	0	0	0	0	0	0	0	0	0	0	0	0	0	0	0	0	0	0	0	0	0	0
A0A0P0VDV6	A0A0P0VDV6_ORYSJ	Os02g0106201 protein	Os02g0106201 OSNPB_020106201	Oryza sativa subsp. japonica (Rice)				VVVMAIVVHAR	0.98237	-10.095	0	0	0	0	0	0	0	0	0	0	0	0	0	0	0	0	0	0	0	0	0	0	0	0	0	0	0
A0A0P0VDY1	A0A0P0VDY1_ORYSJ	Os02g0118800 protein	Os02g0118800 OSNPB_020118800	Oryza sativa subsp. japonica (Rice)				APSRVRFFLWLAAK	0.97554	-23.483	0	0	0	0	0	0	0	0	0	0	0	0	0	0	0	0	0	0	0	0	0	0	0	0	0	0	0
A0A0P0VE09	A0A0P0VE09_ORYSJ	Os02g0113200 protein	Os02g0113200 OsJ_05083 OSNPB_020113200	Oryza sativa subsp. japonica (Rice)			heme binding [GO:0020037]; iron ion binding [GO:0005506]; monooxygenase activity [GO:0004497]; oxidoreductase activity, acting on paired donors, with incorporation or reduction of molecular oxygen [GO:0016705]	VTVPVFGR	0.97598	-3.735	0	0	0	0	0	0	0	0	0	0	0	0	0	0	0	8.26716	0	0	0	0	0	0	0	0	0	0	8.82024
A0A0P0VE10	A0A0P0VE10_ORYSJ	Os02g0119250 protein	Os02g0119250 OSNPB_020119250	Oryza sativa subsp. japonica (Rice)				QPLLHHHHRPRR	0.97957	-7.7702	0	0	0	9.19628	0	0	0	0	0	0	0	0	0	0	0	0	0	0	0	0	0	0	9.22048	0	0	0	0
A0A0P0VE17	A0A0P0VE17_ORYSJ	Os02g0120100 protein	Os02g0120100 OSNPB_020120100	Oryza sativa subsp. japonica (Rice)	protein phosphorylation [GO:0006468]		ATP binding [GO:0005524]; protein kinase activity [GO:0004672]	VVKVADFGVARVK	0.98428	-10.985	0	0	0	0	0	0	0	0	0	0	0	0	0	0	0	0	0	0	0	0	0	0	0	0	0	0	0
A0A0P0VE34	A0A0P0VE34_ORYSJ	Os02g0124600 protein	Os02g0124600 OSNPB_020124600	Oryza sativa subsp. japonica (Rice)			FAD binding [GO:0071949]; oxidoreductase activity [GO:0016491]	IVTPAPAR	0.9762	-3.735	0	0	0	14.8176	0	0	0	0	0	0	0	0	0	0	0	0	0	0	0	0	0	0	0	0	0	0	0
A0A0P0VE40	A0A0P0VE40_ORYSJ	Os02g0124501 protein	Os02g0124501 OSNPB_020124501	Oryza sativa subsp. japonica (Rice)				RPGEALAGGVR	0.9763	-4.4521	0	0	0	0	0	0	0	0	0	0	0	0	0	0	0	0	0	0	9.59046	0	0	0	0	0	0	0	0
A0A0P0VE60	A0A0P0VE60_ORYSJ	Os02g0122700 protein	Os02g0122700 OSNPB_020122700	Oryza sativa subsp. japonica (Rice)	anther dehiscence [GO:0009901]; histone H3-K27 methylation [GO:0070734]; negative regulation of DNA-templated transcription [GO:0045892]; positive regulation of transcription by RNA polymerase II [GO:0045944]; regulation of cell cycle [GO:0051726]; regulation of DNA replication [GO:0006275]	nucleus [GO:0005634]	histone binding [GO:0042393]; histone H3K27 methyltransferase activity [GO:0046976]; metal ion binding [GO:0046872]; transcription coregulator activity [GO:0003712]	KQNLKCVR	0.98379	-8.5133	14.7344	9.85991	0	0	0	0	0	14.9287	0	14.4347	9.10884	0	0	0	0	0	0	0	0	0	0	0	0	10.6433	0	0	0
A0A0P0VE87	A0A0P0VE87_ORYSJ	Os02g0121400 protein	Os02g0121400 OSNPB_020121400	Oryza sativa subsp. japonica (Rice)				RAAMACK	1.0472	-0.00052908	10.5129	0	0	0	0	0	0	0	0	0	0	0	0	0	0	0	0	0	0	0	0	0	0	0	0	0	0
A0A0P0VEB8	A0A0P0VEB8_ORYSJ	Os02g0125350 protein	Os02g0125350 OSNPB_020125350	Oryza sativa subsp. japonica (Rice)				TLAGGGR	0.97776	-3.6711	0	0	0	0	11.6152	0	0	11.4718	0	0	11.2521	0	0	0	0	0	0	0	0	11.0943	0	13.3281	13.513	0	0	0	0
A0A0P0VEC3	A0A0P0VEC3_ORYSJ	Os02g0130300 protein	Os02g0130300 OSNPB_020130300	Oryza sativa subsp. japonica (Rice)			metal ion binding [GO:0046872]	LASLERGVGK	0.9719	-3.2084	0	0	0	0	0	0	0	0	0	0	0	0	0	0	0	0	0	0	0	0	0	0	0	0	0	0	0
A0A0P0VED1	A0A0P0VED1_ORYSJ	Os02g0132800 protein	Os02g0132800 OSNPB_020132800	Oryza sativa subsp. japonica (Rice)	COPII-coated vesicle cargo loading [GO:0090110]; endoplasmic reticulum organization [GO:0007029]; intracellular protein transport [GO:0006886]	COPII vesicle coat [GO:0030127]; endoplasmic reticulum exit site [GO:0070971]	structural molecule activity [GO:0005198]	LCKLDEADVAE	0.98215	-15.832	0	0	0	0	0	0	0	0	0	0	9.82233	0	0	0	0	0	0	0	0	0	0	0	0	0	0	0	0
A0A0P0VED7	A0A0P0VED7_ORYSJ	Os02g0134000 protein	Os02g0134000 OSNPB_020134000	Oryza sativa subsp. japonica (Rice)	coenzyme A biosynthetic process [GO:0015937]; lipid metabolic process [GO:0006629]; lipid storage [GO:0019915]; regulation of coenzyme A biosynthetic process [GO:0080020]; response to salt stress [GO:0009651]		pantetheine-phosphate adenylyltransferase activity [GO:0004595]	MENVKEYIK	0.97302	-2.4684	0	0	10.7231	0	0	0	0	0	0	0	0	0	0	0	0	0	0	0	0	0	0	0	0	0	0	0	0
A0A0P0VEE0	A0A0P0VEE0_ORYSJ	Os02g0135800 protein	Os02g0135800 OSNPB_020135800	Oryza sativa subsp. japonica (Rice)	protein transport [GO:0015031]		structural molecule activity [GO:0005198]	LYNGSWR	0.96351	-2.0335	0	0	0	0	0	0	0	0	0	0	0	0	0	0	0	0	0	0	0	0	0	0	0	0	0	0	0
A0A0P0VEF4	A0A0P0VEF4_ORYSJ	Os02g0131500 protein	Os02g0131500 OSNPB_020131500	Oryza sativa subsp. japonica (Rice)				HAWREHVR	0.97164	-1.7021	0	0	0	0	0	0	0	0	0	0	0	0	0	0	0	0	10.6815	0	0	0	0	0	0	0	0	0	0
A0A0P0VEG0	A0A0P0VEG0_ORYSJ	Os02g0136400 protein	Os02g0136400 OSNPB_020136400	Oryza sativa subsp. japonica (Rice)				INTPLNPSATK	0.97459	-27.629	0	0	0	0	0	0	0	0	0	0	0	0	0	9.32659	0	0	0	0	0	0	0	0	8.65878	0	0	0	0
A0A0P0VEH6	A0A0P0VEH6_ORYSJ	Os02g0127700 protein	Os02g0127700 OSNPB_020127700	Oryza sativa subsp. japonica (Rice)	nucleotide biosynthetic process [GO:0009165]		magnesium ion binding [GO:0000287]; ribose phosphate diphosphokinase activity [GO:0004749]	SSPVVVR	1.0675	-0.00052908	0	0	0	0	0	0	0	0	0	0	0	0	0	0	0	0	0	0	0	0	0	0	0	0	0	0	0
A0A0P0VEI5	A0A0P0VEI5_ORYSJ	Os02g0139300 protein	Os02g0139300 OSNPB_020139300	Oryza sativa subsp. japonica (Rice)				WQWRQKK	1.0648	-0.00052908	0	0	0	0	0	0	0	0	0	0	0	0	0	0	0	0	0	10.0568	0	0	0	0	0	0	0	9.67922	0
A0A0P0VEL8	A0A0P0VEL8_ORYSJ	Auxin response factor	Os02g0141100 OSNPB_020141100	Oryza sativa subsp. japonica (Rice)	auxin-activated signaling pathway [GO:0009734]; regulation of DNA-templated transcription [GO:0006355]	nucleus [GO:0005634]	DNA binding [GO:0003677]	RGGCGGAGER	0.97675	-6.8113	0	0	0	0	0	0	0	0	0	0	0	0	0	0	0	0	0	0	0	0	0	0	0	0	0	0	0
A0A0P0VEP9	A0A0P0VEP9_ORYSJ	Os02g0136966 protein	Os02g0136966 OSNPB_020136966	Oryza sativa subsp. japonica (Rice)				SSRGNVTYR	0.97047	-2.4684	0	0	0	0	9.16204	0	0	0	0	0	0	0	0	0	0	0	0	0	0	0	0	0	0	0	0	0	0
A0A0P0VET1	A0A0P0VET1_ORYSJ	ATP-dependent RNA helicase (EC 3.6.4.13)	Os02g0150100 OSNPB_020150100	Oryza sativa subsp. japonica (Rice)			ATP binding [GO:0005524]; hydrolase activity [GO:0016787]; RNA binding [GO:0003723]; RNA helicase activity [GO:0003724]	LPEPMLRK	0.98228	-15.608	0	0	0	0	0	0	0	0	14.0289	0	0	0	0	0	0	0	0	0	0	10.6026	0	0	0	0	0	0	0
A0A0P0VEW2	A0A0P0VEW2_ORYSJ	Os02g0147800 protein	Os02g0147800 OSNPB_020147800	Oryza sativa subsp. japonica (Rice)			metal ion binding [GO:0046872]	ATRQNTPR	0.9819	-15.971	0	13.7721	0	15.9718	14.0173	0	0	0	14.4351	15.6633	0	0	0	0	0	15.1986	16.8282	17.0284	14.5314	17.2023	0	0	17.4111	0	13.79	8.43946	0
A0A0P0VEX1	A0A0P0VEX1_ORYSJ	Os02g0150450 protein	Os02g0150450 OSNPB_020150450	Oryza sativa subsp. japonica (Rice)				RFVHHLVWR	0.97352	-4.9368	0	0	0	0	0	0	0	0	10.6642	0	0	0	0	11.1098	0	0	0	0	0	0	0	0	0	0	0	0	0
A0A0P0VEY4	A0A0P0VEY4_ORYSJ	Os02g0151350 protein	Os02g0151350 OSNPB_020151350	Oryza sativa subsp. japonica (Rice)				ELQHLAGVRRR	0.98303	-8.0623	0	0	0	0	0	0	0	0	0	0	0	0	0	0	0	0	0	9.35118	0	0	0	0	0	0	0	0	0
A0A0P0VF04	A0A0P0VF04_ORYSJ	Os02g0149050 protein	Os02g0149050 OSNPB_020149050	Oryza sativa subsp. japonica (Rice)		membrane [GO:0016020]		CDYWEGR	0.98055	-6.3935	0	0	0	0	0	0	0	0	0	0	0	0	0	0	0	0	9.66035	0	0	0	0	0	0	0	0	0	0
A0A0P0VF06	A0A0P0VF06_ORYSJ	Os02g0159950 protein	Os02g0159950 OSNPB_020159950	Oryza sativa subsp. japonica (Rice)				FVTSFSLSPIHLERR	0.98348	-10.701	0	0	0	0	0	0	0	0	0	0	0	0	0	0	0	0	0	10.9941	0	0	0	0	0	0	0	0	0
A0A0P0VF15	A0A0P0VF15_ORYSJ	Os02g0155600 protein	Os02g0155600 OSNPB_020155600	Oryza sativa subsp. japonica (Rice)				LKNLATLDLRWNQLTGK	0.98159	-10.57	0	0	0	0	0	0	0	0	0	0	0	0	0	0	0	0	0	0	0	0	0	0	10.0041	0	0	0	0
A0A0P0VF70	A0A0P0VF70_ORYSJ	Os02g0168400 protein	Os02g0168400 OSNPB_020168400	Oryza sativa subsp. japonica (Rice)				VEEEKIVEER	0.97665	-6.8113	0	0	0	0	0	0	0	0	0	0	0	0	0	0	0	0	0	0	0	0	0	0	10.9374	0	0	0	0
A0A0P0VF81	A0A0P0VF81_ORYSJ	Os02g0170900 protein	Os02g0170900 OSNPB_020170900	Oryza sativa subsp. japonica (Rice)				YKMAISFK	0.98312	-1.7021	0	0	0	0	0	0	0	0	0	0	0	0	0	0	0	0	0	0	0	0	0	0	0	0	0	0	0
A0A0P0VFA0	A0A0P0VFA0_ORYSJ	Os02g0162200 protein	Os02g0162200 OSNPB_020162200	Oryza sativa subsp. japonica (Rice)		plasma membrane [GO:0005886]	electron transfer activity [GO:0009055]	RAASPAL	1.0763	-0.00052908	0	0	10.6928	0	0	0	0	0	0	0	9.30113	0	0	0	0	0	10.7566	0	0	0	0	0	0	0	0	0	0
A0A0P0VFA2	A0A0P0VFA2_ORYSJ	Os02g0168250 protein	Os02g0168250 OSNPB_020168250	Oryza sativa subsp. japonica (Rice)				ISDNLPATSR	0.9815	-10.546	0	0	0	0	0	0	0	0	0	0	0	9.86742	0	0	0	0	0	0	0	0	0	0	0	0	0	0	0
A0A0P0VFA5	A0A0P0VFA5_ORYSJ	Os02g0158500 protein	Os02g0158500 OSNPB_020158500	Oryza sativa subsp. japonica (Rice)	plant-type secondary cell wall biogenesis [GO:0009834]; xylan biosynthetic process [GO:0045492]	Golgi apparatus [GO:0005794]; Golgi membrane [GO:0000139]		MQLSFTPSTHSR	0.97397	-3.4819	0	0	0	0	0	0	0	0	0	0	0	0	0	0	0	0	0	0	9.79154	0	0	0	0	0	0	0	0
A0A0P0VFB2	A0A0P0VFB2_ORYSJ	Os02g0174400 protein	Os02g0174400 OSNPB_020174400	Oryza sativa subsp. japonica (Rice)	protein phosphorylation [GO:0006468]	membrane [GO:0016020]	ATP binding [GO:0005524]; protein kinase activity [GO:0004672]	RLQQQPLRPYPR	0.97821	-19.494	0	0	0	0	0	11.5606	0	0	0	0	0	0	0	0	0	0	0	0	0	0	0	0	0	0	0	0	0
A0A0P0VFD2	A0A0P0VFD2_ORYSJ	Inositol-1-monophosphatase (EC 3.1.3.25)	Os02g0169900 OSNPB_020169900	Oryza sativa subsp. japonica (Rice)	inositol biosynthetic process [GO:0006021]; inositol phosphate dephosphorylation [GO:0046855]; phosphatidylinositol phosphate biosynthetic process [GO:0046854]		inositol monophosphate 1-phosphatase activity [GO:0008934]; inositol monophosphate 3-phosphatase activity [GO:0052832]; inositol monophosphate 4-phosphatase activity [GO:0052833]; metal ion binding [GO:0046872]	KGIDFSLWFKPDK	0.98399	-10.985	0	0	0	0	0	0	0	0	10.2013	0	0	0	0	0	0	0	0	0	0	0	0	0	0	0	0	0	0
A0A0P0VFF5	A0A0P0VFF5_ORYSJ	Os02g0174000 protein	Os02g0174000 OSNPB_020174000	Oryza sativa subsp. japonica (Rice)		nucleus [GO:0005634]	DNA binding [GO:0003677]; DNA-binding transcription factor activity [GO:0003700]	LDGEQGRRLR	0.97647	-6.8113	0	0	9.76772	0	13.3278	0	0	0	0	0	0	0	0	0	0	0	0	0	0	0	0	0	0	0	0	0	12.192
A0A0P0VFF7	A0A0P0VFF7_ORYSJ	Ubiquitin receptor RAD23 (DNA repair protein RAD23)	Os02g0179300 OsJ_05616 OSNPB_020179300	Oryza sativa subsp. japonica (Rice)	nucleotide-excision repair [GO:0006289]; proteasome-mediated ubiquitin-dependent protein catabolic process [GO:0043161]	cytosol [GO:0005829]; nucleoplasm [GO:0005654]	damaged DNA binding [GO:0003684]; polyubiquitin modification-dependent protein binding [GO:0031593]; ubiquitin binding [GO:0043130]	HNQQFQALR	0.97545	-23.992	0	0	0	0	0	0	0	0	0	0	0	0	0	0	0	0	0	0	0	0	0	0	10.6461	0	0	0	0
A0A0P0VFG7	A0A0P0VFG7_ORYSJ	Os02g0173900 protein	Os02g0173900 OSNPB_020173900	Oryza sativa subsp. japonica (Rice)			oxidoreductase activity [GO:0016491]	KLMAGSANTVK	0.9712	-3.1201	0	0	0	0	0	0	0	0	0	0	0	0	0	0	0	0	0	0	0	0	0	0	0	0	0	0	0
A0A0P0VFH0	A0A0P0VFH0_ORYSJ	Os02g0176100 protein	Os02g0176100 OSNPB_020176100	Oryza sativa subsp. japonica (Rice)	protein phosphorylation [GO:0006468]	membrane [GO:0016020]	ATP binding [GO:0005524]; protein kinase activity [GO:0004672]	KHKSSTLR	0.98313	-1.7021	0	0	0	0	0	0	0	0	0	0	0	0	0	0	0	0	0	0	0	0	0	0	0	0	0	0	0
A0A0P0VFJ1	A0A0P0VFJ1_ORYSJ	Os02g0178200 protein	Os02g0178200 OSNPB_020178200	Oryza sativa subsp. japonica (Rice)				EGNKLGFLISRLR	0.97537	-34.089	0	0	0	0	0	0	0	0	9.67486	0	0	0	0	0	0	0	0	0	10.7496	10.38	10.461	9.34407	0	9.98356	0	0	0
A0A0P0VFP0	A0A0P0VFP0_ORYSJ	Os02g0185633 protein	Os02g0185633 OSNPB_020185633	Oryza sativa subsp. japonica (Rice)				RPNLSPIMAR	0.98565	-8.8442	0	0	0	0	0	0	0	0	0	0	0	0	0	0	0	0	0	0	0	0	0	0	0	10.6433	0	0	0
A0A0P0VFP7	A0A0P0VFP7_ORYSJ	Os02g0181600 protein	Os02g0181600 OSNPB_020181600	Oryza sativa subsp. japonica (Rice)				VVAGRGRR	0.98407	-1.7021	0	0	0	0	0	0	0	0	0	0	0	0	0	0	0	0	0	0	0	0	0	0	0	0	0	0	0
A0A0P0VFQ2	A0A0P0VFQ2_ORYSJ	Os02g0192150 protein	Os02g0192150 OSNPB_020192150	Oryza sativa subsp. japonica (Rice)				MQLVPKHMK	0.97016	-2.4684	0	0	0	0	0	0	0	0	0	0	0	0	0	0	0	0	0	0	0	0	0	0	0	0	0	0	0
A0A0P0VFQ4	A0A0P0VFQ4_ORYSJ	Os02g0185900 protein	Os02g0185900 OSNPB_020185900	Oryza sativa subsp. japonica (Rice)		membrane [GO:0016020]	heme binding [GO:0020037]; iron ion binding [GO:0005506]; monooxygenase activity [GO:0004497]; oxidoreductase activity, acting on paired donors, with incorporation or reduction of molecular oxygen [GO:0016705]	FASRPWPPTIRK	0.97994	-7.7702	0	0	0	0	0	0	0	0	0	0	0	0	0	0	0	0	0	0	0	0	0	0	9.46995	0	0	0	0
A0A0P0VFR9	A0A0P0VFR9_ORYSJ	Os02g0191600 protein	Os02g0191600 OSNPB_020191600	Oryza sativa subsp. japonica (Rice)			DNA binding [GO:0003677]; DNA-binding transcription factor activity [GO:0003700]	APNSLKLK	0.98362	-1.7021	0	0	0	0	0	0	0	0	0	0	0	0	0	0	0	0	0	0	0	0	12.5056	0	0	0	0	0	12.8652
A0A0P0VFU2	A0A0P0VFU2_ORYSJ	Os02g0186500 protein (Receptor protein kinase PERK1-like protein)	Os02g0186500 OJ1073_F05.16 OJ1115_B01.27	Oryza sativa subsp. japonica (Rice)	protein phosphorylation [GO:0006468]		ATP binding [GO:0005524]; protein serine/threonine kinase activity [GO:0004674]	HKSLLSLRGYCAEGQER	0.97773	-18.633	0	0	0	0	0	0	0	0	0	0	0	0	0	10.6767	9.45004	0	0	0	0	0	0	0	0	0	0	0	0
A0A0P0VFW7	A0A0P0VFW7_ORYSJ	Os02g0196700 protein	Os02g0196700 OSNPB_020196700	Oryza sativa subsp. japonica (Rice)	carbohydrate metabolic process [GO:0005975]		polygalacturonase activity [GO:0004650]	RHVGDARGR	0.97039	-2.4684	0	0	0	0	0	0	0	0	0	0	0	0	0	0	0	0	0	0	0	10.9525	0	0	0	0	0	0	0
A0A0P0VFX0	A0A0P0VFX0_ORYSJ	Os02g0198100 protein	Os02g0198100 OSNPB_020198100	Oryza sativa subsp. japonica (Rice)				FLDTHMPIVAALSM	0.98747	-10.086	0	0	0	0	0	0	0	0	0	0	0	0	0	0	0	0	0	0	0	0	0	0	0	0	0	0	0
A0A0P0VFX6	A0A0P0VFX6_ORYSJ	Os02g0195533 protein	Os02g0195533 OSNPB_020195533	Oryza sativa subsp. japonica (Rice)				QEPLPPH	0.97743	-3.6711	0	0	0	0	0	0	0	0	0	0	0	0	0	0	0	0	0	0	0	0	0	0	9.0492	0	0	0	0
A0A0P0VFX7	A0A0P0VFX7_ORYSJ	Os02g0195500 protein	Os02g0195500 OSNPB_020195500	Oryza sativa subsp. japonica (Rice)	L-arabinose metabolic process [GO:0046373]		alpha-L-arabinofuranosidase activity [GO:0046556]	NVIQKYSIER	0.9714	-3.2084	0	0	0	0	0	0	0	0	0	0	0	0	0	0	0	0	0	0	0	10.8802	0	0	11.3877	0	0	0	0
A0A0P0VFY2	A0A0P0VFY2_ORYSJ	Os02g0194350 protein	Os02g0194350 OSNPB_020194350	Oryza sativa subsp. japonica (Rice)				MFIATLPSLTR	0.98233	-10.095	0	0	0	0	0	0	0	0	0	0	0	0	0	0	0	0	0	0	0	0	0	0	0	0	0	0	0
A0A0P0VFY8	A0A0P0VFY8_ORYSJ	Os02g0192600 protein	Os02g0192600 OSNPB_020192600	Oryza sativa subsp. japonica (Rice)				HGQAHRHRQPQQR	0.98295	-10.985	0	0	0	0	0	9.50508	0	0	0	0	0	0	0	0	0	0	0	0	0	0	0	0	0	0	0	0	0
A0A0P0VG19	A0A0P0VG19_ORYSJ	Os02g0199101 protein	Os02g0199101 OSNPB_020199101	Oryza sativa subsp. japonica (Rice)				ELLPLEMEVLPPK	0.98311	-15.486	13.759	0	11.0741	0	0	0	0	0	0	0	0	0	0	0	0	0	0	0	0	0	0	0	0	0	0	0	0
A0A0P0VG31	DJC16_ORYSJ	DnaJ protein P58IPK homolog A (OsP58A) (Chaperone protein dnaJ C16) (OsDjC16)	P58A DJC16 Os02g0195300 LOC_Os02g10180 OJ1225_F07.10 OsJ_05745	Oryza sativa subsp. japonica (Rice)		endoplasmic reticulum lumen [GO:0005788]		NLVKKTK	0.97124	-5.0617	0	0	0	0	0	0	0	0	0	0	0	0	0	0	0	0	0	0	0	0	0	0	0	0	0	0	0
A0A0P0VG35	A0A0P0VG35_ORYSJ	Os02g0198700 protein	Os02g0198700 OSNPB_020198700	Oryza sativa subsp. japonica (Rice)				QLCFLGSLDPEKVK	0.98741	-10.086	0	0	0	0	0	0	0	11.7386	0	0	0	0	0	0	0	0	0	0	0	0	0	0	0	0	0	0	0
A0A0P0VG47	A0A0P0VG47_ORYSJ	Os02g0198400 protein	Os02g0198400 OSNPB_020198400	Oryza sativa subsp. japonica (Rice)	response to abscisic acid [GO:0009737]	nucleus [GO:0005634]; plasma membrane [GO:0005886]		QIEIEVKKIR	0.97805	-6.8113	0	0	0	0	0	0	0	0	0	0	0	0	0	0	0	8.44489	0	0	0	0	0	0	0	0	0	0	0
A0A0P0VG51	A0A0P0VG51_ORYSJ	Putative agenet domain-containing protein	P0544H11.20-1 OsJ_05817 OSJNBb0056C19.4-1	Oryza sativa subsp. japonica (Rice)		nucleus [GO:0005634]		FPGDSPRSQLR	0.98486	-13.493	0	0	12.419	0	0	0	0	9.75682	10.0732	10.1187	10.0447	0	9.87613	9.722	9.86854	11.0798	11.1211	11.1244	10.4223	11.3385	11.2104	13.9643	10.8951	10.9388	10.6007	10.5756	10.6158
A0A0P0VG98	A0A0P0VG98_ORYSJ	Os02g0208675 protein	Os02g0208675 OSNPB_020208675	Oryza sativa subsp. japonica (Rice)				HPRVGLGVVRDR	0.98432	-8.4849	0	0	0	0	0	0	0	0	0	0	0	0	0	0	0	0	0	0	0	0	0	0	0	0	0	0	0
A0A0P0VGB2	A0A0P0VGB2_ORYSJ	Os02g0211350 protein	Os02g0211350 OSNPB_020211350	Oryza sativa subsp. japonica (Rice)				TSLFLATVQRR	0.97713	-3.9363	0	0	0	0	0	0	0	0	0	0	0	0	0	0	0	0	0	0	13.1398	0	0	0	0	9.40384	0	0	0
A0A0P0VGD9	A0A0P0VGD9_ORYSJ	Os02g0212975 protein	Os02g0212975	Oryza sativa subsp. japonica (Rice)				LDAMSSTAVASRHR	0.97453	-27.432	0	0	0	0	13.3515	0	0	0	0	0	0	0	0	0	0	0	0	0	0	0	0	0	0	0	0	0	0
A0A0P0VGE1	A0A0P0VGE1_ORYSJ	Os02g0216150 protein	Os02g0216150 OSNPB_020216150	Oryza sativa subsp. japonica (Rice)				DLACTFP	0.97119	-2.0335	0	11.2213	0	0	0	0	0	0	0	0	0	0	0	0	0	0	0	0	0	0	0	0	10.7904	0	0	0	0
A0A0P0VGF2	A0A0P0VGF2_ORYSJ	Os02g0216500 protein	Os02g0216500 OSNPB_020216500	Oryza sativa subsp. japonica (Rice)				AIFMLHSLRLLYGK	0.97321	-0.0023387	0	0	0	0	0	0	0	0	14.5499	0	0	10.1558	0	0	0	0	0	8.63074	0	0	0	0	0	0	0	0	0
A0A0P0VGF7	A0A0P0VGF7_ORYSJ	Os02g0217250 protein	Os02g0217250 OSNPB_020217250	Oryza sativa subsp. japonica (Rice)				RAGASSAGRAR	0.98229	-8.0623	0	0	0	0	0	0	0	0	0	0	0	0	0	0	0	10.1041	0	0	0	0	0	0	0	0	0	0	0
A0A0P0VGJ2	A0A0P0VGJ2_ORYSJ	Os02g0218550 protein	Os02g0218550 OSNPB_020218550	Oryza sativa subsp. japonica (Rice)				LRHAVALQHHR	0.98251	-8.0623	0	0	0	0	0	0	0	0	0	0	0	0	0	0	0	0	0	0	0	0	0	0	0	0	0	0	9.90372
A0A0P0VGJ4	A0A0P0VGJ4_ORYSJ	Os02g0220600 protein	Os02g0220600 OSNPB_020220600	Oryza sativa subsp. japonica (Rice)	response to chemical [GO:0042221]		glutathione transferase activity [GO:0004364]	ALIAAEYSGVKVELAK	0.98249	-15.187	0	0	0	0	0	0	0	0	0	0	0	0	0	0	0	0	0	0	0	0	0	0	16.0778	0	0	0	0
A0A0P0VGJ8	A0A0P0VGJ8_ORYSJ	Os02g0221100 protein	Os02g0221100 OSNPB_020221100	Oryza sativa subsp. japonica (Rice)			protein dimerization activity [GO:0046983]	AVESLVAPPPPP	0.97498	-32.695	0	0	0	0	0	10.7024	0	0	0	0	10.9405	0	0	0	0	0	0	0	0	0	0	11.1319	0	10.496	0	0	0
A0A0P0VGM6	A0A0P0VGM6_ORYSJ	Os02g0222000 protein	Os02g0222000 OSNPB_020222000	Oryza sativa subsp. japonica (Rice)				QEEAQDGGQR	0.98636	-12.248	0	0	0	0	0	0	0	0	0	0	0	0	0	0	0	0	0	0	0	0	0	0	0	10.7296	0	0	9.71184
A0A0P0VGP9	A0A0P0VGP9_ORYSJ	Os02g0229501 protein	Os02g0229501 OSNPB_020229501	Oryza sativa subsp. japonica (Rice)		membrane [GO:0016020]		VFLIIPMK	0.97624	-3.735	0	0	0	0	0	0	0	0	0	0	0	0	0	0	0	0	0	0	0	0	0	0	0	0	0	0	0
A0A0P0VGR5	A0A0P0VGR5_ORYSJ	Os02g0227500 protein	Os02g0227500 OSNPB_020227500	Oryza sativa subsp. japonica (Rice)	protein phosphorylation [GO:0006468]	plasma membrane [GO:0005886]	ATP binding [GO:0005524]; protein kinase activity [GO:0004672]	LRQCARWWR	0.97447	-3.2352	0	0	0	0	0	0	0	0	0	0	0	0	0	0	0	0	0	10.3776	0	0	0	0	0	0	0	9.76861	0
A0A0P0VGS4	A0A0P0VGS4_ORYSJ	Os02g0233566 protein	Os02g0233566 OSNPB_020233566	Oryza sativa subsp. japonica (Rice)				VATRRAAK	0.98303	-1.7021	0	0	0	0	0	0	0	0	0	0	0	0	0	0	0	0	0	0	0	0	0	0	0	0	0	0	0
A0A0P0VGS8	A0A0P0VGS8_ORYSJ	Os02g0226400 protein	Os02g0226400 OSNPB_020226400	Oryza sativa subsp. japonica (Rice)				GFLPTATPVAAHFLR	0.97515	-1.2683	0	0	0	0	0	0	0	0	0	0	0	0	0	0	0	0	0	0	0	0	0	0	0	0	0	0	0
A0A0P0VGT1	A0A0P0VGT1_ORYSJ	Os02g0227800 protein	Os02g0227800 OSNPB_020227800	Oryza sativa subsp. japonica (Rice)				LLRLTGLHCHR	0.98444	-11.616	0	0	0	0	0	0	0	0	0	0	0	0	0	0	0	0	0	0	0	0	0	0	0	0	0	0	0
A0A0P0VGT5	A0A0P0VGT5_ORYSJ	Os02g0228600 protein	Os02g0228600 OSNPB_020228600	Oryza sativa subsp. japonica (Rice)				IGRGISLSSR	0.97957	-6.8113	0	0	0	0	0	0	0	0	0	0	0	0	0	0	0	0	0	0	0	0	0	0	0	0	0	0	0
A0A0P0VGU4	A0A0P0VGU4_ORYSJ	Os02g0231850 protein	Os02g0231850 OSNPB_020231850	Oryza sativa subsp. japonica (Rice)				FGRAICDVRK	0.97949	-6.8113	12.2838	0	0	0	0	0	0	0	0	0	0	0	0	0	0	0	0	0	0	0	0	0	0	0	0	0	0
A0A0P0VGX1	A0A0P0VGX1_ORYSJ	Os02g0236900 protein	Os02g0236900 OSNPB_020236900	Oryza sativa subsp. japonica (Rice)				TDPSQPFTKQSWKK	0.98774	-10.086	0	0	0	0	0	0	0	0	0	0	0	0	0	0	0	0	0	0	0	0	0	0	0	0	0	0	0
A0A0P0VH18	A0A0P0VH18_ORYSJ	Os02g0241650 protein	Os02g0241650 OSNPB_020241650	Oryza sativa subsp. japonica (Rice)				GRLSQHK	1.045	-0.00052908	0	0	0	0	0	0	0	0	0	0	0	0	0	0	8.91133	0	0	0	0	0	0	0	0	0	0	0	0
A0A0P0VH79	A0A0P0VH79_ORYSJ	Os02g0257300 protein	Os02g0257300 OSNPB_020257300	Oryza sativa subsp. japonica (Rice)		membrane [GO:0016020]		QSGAPDLREAK	0.98074	-8.0623	0	0	0	0	0	0	0	0	0	0	0	11.0758	0	0	0	0	0	12.022	0	0	0	0	0	0	0	0	0
A0A0P0VHA7	A0A0P0VHA7_ORYSJ	Os02g0265200 protein	Os02g0265200 OSNPB_020265200	Oryza sativa subsp. japonica (Rice)				EVGVEAAWSFPELTVR	0.98428	-10.686	0	0	0	0	0	0	0	0	0	0	0	0	0	0	0	0	0	0	0	0	0	0	0	11.3597	0	0	0
A0A0P0VHA9	A0A0P0VHA9_ORYSJ	Os02g0262200 protein	Os02g0262200 OSNPB_020262200	Oryza sativa subsp. japonica (Rice)	regulation of DNA-templated transcription [GO:0006355]	nucleus [GO:0005634]	zinc ion binding [GO:0008270]	KPGVHAK	0.98653	-9.2834	0	0	0	0	0	0	0	0	0	0	0	0	0	0	0	0	0	0	0	0	0	0	0	0	0	0	0
A0A0P0VHB1	A0A0P0VHB1_ORYSJ	Os02g0262600 protein	Os02g0262600 OSNPB_020262600	Oryza sativa subsp. japonica (Rice)	defense response [GO:0006952]		ADP binding [GO:0043531]	GFPLAAKTVGR	0.98074	-8.0623	0	0	0	0	0	0	0	0	0	0	0	0	0	0	0	0	0	0	0	0	0	0	0	0	0	0	0
A0A0P0VHG1	A0A0P0VHG1_ORYSJ	Os02g0267975 protein (Os02g0268500 protein)	Os02g0267975 Os02g0268500 OSNPB_020267975 OSNPB_020268500	Oryza sativa subsp. japonica (Rice)				SHRVCGR	1.0324	-0.00052908	0	0	0	0	0	0	0	0	11.1168	0	0	0	0	0	0	0	0	0	0	0	0	0	0	0	0	0	0
A0A0P0VHG4	A0A0P0VHG4_ORYSJ	Os02g0276400 protein	Os02g0276400 OSNPB_020276400	Oryza sativa subsp. japonica (Rice)				EHDPSGADVEIFRRR	0.98324	-10.701	0	0	0	0	0	0	0	0	0	0	0	0	0	0	0	0	0	0	0	0	0	0	0	0	0	0	0
A0A0P0VHG9	A0A0P0VHG9_ORYSJ	Os02g0273300 protein	Os02g0273300 OSNPB_020273300	Oryza sativa subsp. japonica (Rice)				MSSEVPR	0.98072	-6.3935	0	0	0	0	0	0	0	0	0	0	0	0	0	0	0	0	0	0	0	0	0	0	0	0	0	0	0
A0A0P0VHM8	A0A0P0VHM8_ORYSJ	Os02g0284550 protein	Os02g0284550 OSNPB_020284550	Oryza sativa subsp. japonica (Rice)		membrane [GO:0016020]		GVAWLFIPIIGTK	0.96977	-2.2492	0	0	0	11.1983	0	0	0	0	0	0	0	0	0	0	0	10.0298	0	10.0562	0	0	12.7903	0	0	0	0	0	0
A0A0P0VHQ0	A0A0P0VHQ0_ORYSJ	Os02g0286000 protein	Os02g0286000 OSNPB_020286000	Oryza sativa subsp. japonica (Rice)	regulation of DNA-templated transcription [GO:0006355]		5'-3' exodeoxyribonuclease activity [GO:0035312]; 5'-3' exoribonuclease activity [GO:0004534]; DNA binding [GO:0003677]	RQQQVSR	1.0452	-0.00052908	0	0	0	0	0	0	0	0	0	0	0	0	0	0	0	0	0	0	0	0	0	0	0	0	0	0	0
A0A0P0VHR4	A0A0P0VHR4_ORYSJ	Os02g0278450 protein	Os02g0278450 OSNPB_020278450	Oryza sativa subsp. japonica (Rice)				MAPVLAVGR	0.97499	-4.5014	0	0	0	0	0	0	0	11.4903	0	0	0	0	0	0	0	0	0	0	0	0	0	0	0	0	0	0	0
A0A0P0VHR9	A0A0P0VHR9_ORYSJ	Os02g0286700 protein	Os02g0286700 OSNPB_020286700	Oryza sativa subsp. japonica (Rice)	chlorophyll catabolic process [GO:0015996]		chlorophyllase activity [GO:0047746]; cutinase activity [GO:0050525]	TIGGLMVAFLR	0.98209	-10.095	0	0	0	14.3663	0	0	0	0	0	0	0	0	0	0	0	0	0	0	0	0	0	0	0	0	0	0	0
A0A0P0VHT7	A0A0P0VHT7_ORYSJ	1-phosphatidylinositol 4-kinase (EC 2.7.1.67)	Os02g0290500 OSNPB_020290500	Oryza sativa subsp. japonica (Rice)			1-phosphatidylinositol 4-kinase activity [GO:0004430]	AFPVKEVQK	0.97323	-2.4684	0	14.8891	0	0	14.4175	14.3093	0	0	0	14.4347	14.7	0	0	0	0	15.3019	0	0	0	0	12.7588	15.5995	0	15.7214	0	0	0
A0A0P0VHU6	A0A0P0VHU6_ORYSJ	Os02g0290900 protein	Os02g0290900 OsJ_06317 OSNPB_020290900	Oryza sativa subsp. japonica (Rice)			hydrolase activity, acting on ester bonds [GO:0016788]	NLYNINVRK	0.97209	-2.4684	0	0	0	0	0	0	0	0	0	0	11.0859	0	0	0	0	0	0	11.3551	0	0	0	0	0	0	0	0	0
A0A0P0VHV0	A0A0P0VHV0_ORYSJ	Os02g0295001 protein	Os02g0295001 OSNPB_020295001	Oryza sativa subsp. japonica (Rice)				MMSIAGR	0.98045	-6.3935	0	0	0	0	0	0	0	0	0	0	0	0	0	0	0	0	10.649	0	0	0	0	0	0	0	0	0	0
A0A0P0VHV9	A0A0P0VHV9_ORYSJ	Os02g0297666 protein	Os02g0297666 OSNPB_020297666	Oryza sativa subsp. japonica (Rice)				AQLDEQSIEHRR	0.98754	-7.7702	0	0	0	0	0	0	0	0	0	0	0	0	0	0	0	0	0	0	8.82829	0	0	0	0	0	0	0	0
A0A0P0VI11	A0A0P0VI11_ORYSJ	Os02g0297732 protein	Os02g0297732 OSNPB_020297732	Oryza sativa subsp. japonica (Rice)		membrane [GO:0016020]		HLLRPHHRR	0.97259	-2.4684	0	0	0	0	0	0	0	0	0	0	0	0	0	0	0	0	0	0	0	0	0	0	0	12.5428	0	0	0
A0A0P0VI12	A0A0P0VI12_ORYSJ	Os02g0303100 protein	Os02g0303100 OSNPB_020303100	Oryza sativa subsp. japonica (Rice)				ALLIELYFLHKMGK	0.97114	-1.8167	0	0	0	0	0	0	0	0	0	0	0	0	0	0	0	0	0	0	0	0	0	0	0	0	0	0	0
A0A0P0VI60	A0A0P0VI60_ORYSJ	Os02g0313500 protein	Os02g0313500 OSNPB_020313500	Oryza sativa subsp. japonica (Rice)				RDFTMISSQHK	0.9806	-8.0623	0	0	0	0	0	0	0	0	0	0	0	0	0	0	0	0	0	0	0	0	0	0	0	0	0	0	0
A0A0P0VI79	A0A0P0VI79_ORYSJ	Os02g0312550 protein	Os02g0312550 OSNPB_020312550	Oryza sativa subsp. japonica (Rice)				NRKPKLQQQR	0.97418	-3.2085	0	0	0	0	0	0	0	0	0	0	0	0	0	0	0	0	9.87334	0	0	0	0	0	0	0	0	0	0
A0A0P0VI82	A0A0P0VI82_ORYSJ	Os02g0315200 protein	Os02g0315200 OSNPB_020315200	Oryza sativa subsp. japonica (Rice)				RRHSLLPR	0.98501	-1.7021	0	0	9.15419	0	0	0	0	0	0	0	0	0	0	0	0	0	0	0	0	0	0	9.51312	0	0	0	0	0
A0A0P0VI87	A0A0P0VI87_ORYSJ	Os02g0322251 protein	Os02g0322251 OSNPB_020322251	Oryza sativa subsp. japonica (Rice)				GLRRQEHR	0.98193	-15.884	0	0	0	12.6222	0	0	0	0	0	0	0	10.0638	0	0	0	0	0	0	0	0	0	0	0	0	0	0	0
A0A0P0VIE0	A0A0P0VIE0_ORYSJ	Endoplasmic reticulum transmembrane protein	Os02g0321800 OSNPB_020321800	Oryza sativa subsp. japonica (Rice)	endoplasmic reticulum to Golgi vesicle-mediated transport [GO:0006888]; intracellular protein transport [GO:0006886]; protein localization to endoplasmic reticulum exit site [GO:0070973]	endoplasmic reticulum membrane [GO:0005789]		TNLQSDR	0.96842	-2.0335	0	0	0	0	0	0	0	0	0	0	0	0	0	0	0	0	10.7228	0	0	0	0	0	0	0	0	0	0
A0A0P0VIF3	A0A0P0VIF3_ORYSJ	Os02g0326900 protein	Os02g0326900 OSNPB_020326900	Oryza sativa subsp. japonica (Rice)				HCQPYARRQR	0.97967	-16.931	0	8.74608	0	0	0	8.88307	0	0	0	9.52906	0	0	0	0	0	0	0	0	0	0	0	0	0	0	0	0	0
A0A0P0VIF7	A0A0P0VIF7_ORYSJ	Os02g0328500 protein	Os02g0328500 OSNPB_020328500	Oryza sativa subsp. japonica (Rice)				MEHLGSSSIVR	0.98415	-10.095	0	0	0	0	0	0	0	0	0	0	0	0	0	0	0	0	0	12.3923	0	0	0	0	0	0	0	0	0
A0A0P0VIH3	A0A0P0VIH3_ORYSJ	Os02g0436000 protein	Os02g0436000 OSNPB_020436000	Oryza sativa subsp. japonica (Rice)				RRPELAGVIGSK	0.9768	-3.4816	0	0	0	0	0	0	0	0	0	0	0	0	0	0	0	0	0	0	0	0	0	11.5887	0	0	0	0	0
A0A0P0VII7	A0A0P0VII7_ORYSJ	Os02g0437800 protein	Os02g0437800 OSNPB_020437800	Oryza sativa subsp. japonica (Rice)	vesicle-mediated transport [GO:0016192]			MTLITLIR	0.97572	-6.2804	0	0	11.4872	0	0	0	9.29071	0	0	0	0	10.845	0	9.06886	0	0	0	0	0	0	0	0	0	0	0	0	0
A0A0P0VIJ1	A0A0P0VIJ1_ORYSJ	Os02g0438700 protein	Os02g0438700 OSNPB_020438700	Oryza sativa subsp. japonica (Rice)				NSAIIKGGSA	0.98013	-6.8113	0	0	0	0	0	0	0	0	0	0	0	0	0	0	0	0	0	0	0	0	0	0	0	0	0	0	0
A0A0P0VIK0	A0A0P0VIK0_ORYSJ	Os02g0450000 protein	Os02g0450000 OSNPB_020450000	Oryza sativa subsp. japonica (Rice)				WLSAPGSLAGGIDR	0.98481	-10.086	0	0	0	0	0	0	0	0	0	0	0	0	0	0	0	0	0	0	0	0	0	0	0	0	0	0	0
A0A0P0VIL9	A0A0P0VIL9_ORYSJ	Os02g0453300 protein	Os02g0453300 OSNPB_020453300	Oryza sativa subsp. japonica (Rice)				RRSSLLLYR	0.97092	-2.4684	0	0	0	0	0	0	0	0	0	0	0	0	0	0	0	0	0	0	0	0	0	0	0	0	0	0	0
A0A0P0VIM4	A0A0P0VIM4_ORYSJ	Os02g0456100 protein	Os02g0456100 OSNPB_020456100	Oryza sativa subsp. japonica (Rice)				LQELNDQR	0.97406	-3.2122	0	0	0	9.52384	0	0	0	0	0	0	0	0	0	0	0	0	0	0	0	0	0	0	0	0	0	0	0
A0A0P0VIN4	A0A0P0VIN4_ORYSJ	Os02g0458900 protein	Os02g0458900 OSNPB_020458900	Oryza sativa subsp. japonica (Rice)			hydrolase activity, acting on ester bonds [GO:0016788]	HWALLQWPPRHR	0.9843	-12.584	0	0	0	0	0	0	0	0	0	0	0	0	0	0	0	0	0	0	0	0	0	0	0	0	0	0	0
A0A0P0VIR0	A0A0P0VIR0_ORYSJ	Os02g0459400 protein	Os02g0459400 OSNPB_020459400	Oryza sativa subsp. japonica (Rice)		membrane [GO:0016020]		NQNLFRSWFR	0.97556	-6.2452	0	0	0	0	0	0	0	0	0	0	0	0	0	0	0	0	0	0	0	0	0	0	0	0	9.83615	0	0
A0A0P0VIR7	A0A0P0VIR7_ORYSJ	Os02g0463950 protein	Os02g0463950 OSNPB_020463950	Oryza sativa subsp. japonica (Rice)				GGEWGSGWERDGVQR	0.98403	-10.701	0	0	0	0	0	0	0	0	0	0	0	0	0	0	0	11.3362	0	0	0	0	0	0	0	0	0	0	0
A0A0P0VIT7	A0A0P0VIT7_ORYSJ	Os02g0460000 protein	Os02g0460000 OSNPB_020460000	Oryza sativa subsp. japonica (Rice)				MWGCRAGRR	0.98758	-0.76684	0	0	0	0	0	0	0	0	0	0	0	0	0	0	0	0	0	10.6703	0	0	0	0	0	0	0	0	0
A0A0P0VIU9	A0A0P0VIU9_ORYSJ	Inositol-tetrakisphosphate 1-kinase (EC 2.7.1.134)	Os02g0466400 OSNPB_020466400	Oryza sativa subsp. japonica (Rice)	inositol trisphosphate metabolic process [GO:0032957]; phosphorylation [GO:0016310]		ATP binding [GO:0005524]; inositol tetrakisphosphate 1-kinase activity [GO:0047325]; inositol-1,3,4-trisphosphate 5-kinase activity [GO:0052726]; inositol-1,3,4-trisphosphate 6-kinase activity [GO:0052725]; magnesium ion binding [GO:0000287]	IASIPSIR	0.97394	-3.2122	0	10.8467	0	0	0	0	0	0	0	0	0	0	0	0	0	10.7842	10.7595	0	0	0	0	10.7008	0	0	0	0	0
A0A0P0VIV5	A0A0P0VIV5_ORYSJ	Os02g0469950 protein	Os02g0469950 OSNPB_020469950	Oryza sativa subsp. japonica (Rice)				NPSSPPPPP	0.97489	-4.5014	0	0	0	0	0	0	0	0	0	0	0	0	0	0	0	14.3455	0	0	0	0	0	0	0	0	0	0	0
A0A0P0VIW1	A0A0P0VIW1_ORYSJ	Os02g0472500 protein	Os02g0472500 OSNPB_020472500	Oryza sativa subsp. japonica (Rice)	response to biotic stimulus [GO:0009607]	extracellular space [GO:0005615]; membrane [GO:0016020]		IQTLYTYVLKK	0.97784	-6.3608	0	0	0	0	0	11.396	0	0	0	0	0	0	0	0	0	0	0	0	0	0	0	0	0	0	0	0	0
A0A0P0VIW3	A0A0P0VIW3_ORYSJ	Os02g0470600 protein	Os02g0470600 OSNPB_020470600	Oryza sativa subsp. japonica (Rice)				MFEGHVLYLLR	0.97801	-6.3608	0	0	0	0	0	0	0	0	0	0	0	0	0	0	0	0	0	0	12.4748	0	0	0	0	0	0	0	0
A0A0P0VIW6	A0A0P0VIW6_ORYSJ	Os02g0472700 protein	Os02g0472700 OSNPB_020472700	Oryza sativa subsp. japonica (Rice)	protein phosphorylation [GO:0006468]	plasma membrane [GO:0005886]	ATP binding [GO:0005524]; protein serine/threonine kinase activity [GO:0004674]	REQLAWDARYK	0.97761	-6.3608	0	0	0	0	0	0	0	0	0	0	0	0	0	0	0	0	0	0	0	0	0	0	0	0	0	0	0
A0A0P0VJ01	A0A0P0VJ01_ORYSJ	Os02g0475500 protein	Os02g0475500 OSNPB_020475500	Oryza sativa subsp. japonica (Rice)	defense response [GO:0006952]		ADP binding [GO:0043531]	DRDLSQIGNFLHLR	0.97528	-24.341	0	0	0	0	0	0	0	0	0	0	0	0	0	0	0	0	0	0	0	0	0	9.81559	0	0	0	0	0
A0A0P0VJ02	A0A0P0VJ02_ORYSJ	Os02g0478100 protein	Os02g0478100 OSNPB_020478100	Oryza sativa subsp. japonica (Rice)				DRDLSQIGNFLHLR	0.97163	-2.4684	0	0	0	0	0	0	0	0	0	0	0	12.5926	0	0	0	0	0	0	0	0	0	0	0	0	0	0	0
A0A0P0VJ04	A0A0P0VJ04_ORYSJ	Os02g0478500 protein	Os02g0478500 OSNPB_020478500	Oryza sativa subsp. japonica (Rice)				NHQYPNFQNQRDPR	0.98295	-10.852	0	0	0	0	0	0	0	0	0	10.2234	0	0	0	0	0	0	10.2369	0	0	0	0	0	0	0	0	0	0
A0A0P0VJ14	A0A0P0VJ14_ORYSJ	Os02g0478450 protein	Os02g0478450 OSNPB_020478450	Oryza sativa subsp. japonica (Rice)				QLPPSGARPVR	0.98197	-10.095	0	0	0	0	0	0	0	0	0	0	0	0	0	0	0	0	0	0	0	0	0	0	0	0	0	0	16.4499
A0A0P0VJ30	A0A0P0VJ30_ORYSJ	Os02g0476700 protein	Os02g0476700 OSNPB_020476700	Oryza sativa subsp. japonica (Rice)				MARWMSIQQLK	0.98025	-8.0623	0	0	0	0	0	0	0	0	0	0	0	0	0	0	0	0	0	0	0	0	0	0	0	0	0	0	0
A0A0P0VJ34	A0A0P0VJ34_ORYSJ	5'-3' exoribonuclease (EC 3.1.13.-)	Os02g0481900 OSJNBa0091C16.23-1	Oryza sativa subsp. japonica (Rice)	mRNA processing [GO:0006397]	nucleus [GO:0005634]	5'-3' exoribonuclease activity [GO:0004534]; nucleic acid binding [GO:0003676]	ISQALTYYIR	0.98362	-14.422	0	0	0	0	0	0	10.7448	0	0	0	0	0	0	0	0	0	0	0	0	0	0	0	0	0	0	0	0
A0A0P0VJ46	A0A0P0VJ46_ORYSJ	Os02g0486900 protein	Os02g0486900 OSNPB_020486900	Oryza sativa subsp. japonica (Rice)				ARGGGAVEGRR	0.97335	-3.1204	0	0	0	0	0	0	0	0	0	0	0	0	0	0	0	0	0	0	0	0	0	0	0	0	0	0	0
A0A0P0VJ49	A0A0P0VJ49_ORYSJ	Os02g0479900 protein	Os02g0479900 OSNPB_020479900	Oryza sativa subsp. japonica (Rice)				RNLHNYQR	0.98002	-7.9472	0	0	0	0	0	0	0	0	0	0	0	0	8.86065	0	0	0	0	0	0	0	0	0	0	0	0	0	0
A0A0P0VJ86	A0A0P0VJ86_ORYSJ	Os02g0493050 protein	Os02g0493050 OSNPB_020493050	Oryza sativa subsp. japonica (Rice)		intracellular organelle [GO:0043229]		GAGALHVSSGR	0.97525	-24.002	0	0	11.9713	0	0	0	0	0	0	0	0	0	0	0	0	0	0	0	0	0	8.72325	0	0	0	0	0	0
A0A0P0VJ90	A0A0P0VJ90_ORYSJ	Os02g0495400 protein	Os02g0495400 OSNPB_020495400	Oryza sativa subsp. japonica (Rice)		cytoplasm [GO:0005737]; nucleus [GO:0005634]		LSIVLSLSIHRPNRER	0.9748	-23.881	0	0	0	0	0	0	0	0	0	0	0	0	0	0	0	0	0	0	0	0	0	0	0	0	0	0	0
A0A0P0VJ98	A0A0P0VJ98_ORYSJ	Os02g0502900 protein	Os02g0502900 OSNPB_020502900	Oryza sativa subsp. japonica (Rice)				VVAGTASAVASDR	0.97664	-3.5809	0	0	0	0	0	0	9.55077	0	0	0	0	0	0	0	0	0	0	0	0	0	0	0	0	0	0	0	0
A0A0P0VJA4	A0A0P0VJA4_ORYSJ	Os02g0503100 protein	Os02g0503100 OSNPB_020503100	Oryza sativa subsp. japonica (Rice)		membrane [GO:0016020]	heme binding [GO:0020037]; iron ion binding [GO:0005506]; monooxygenase activity [GO:0004497]; oxidoreductase activity, acting on paired donors, with incorporation or reduction of molecular oxygen [GO:0016705]	FAAGGER	0.97536	-26.096	0	0	0	0	0	0	0	0	0	0	0	0	0	0	0	0	0	10.479	0	0	0	0	0	0	0	0	0
A0A0P0VJA8	A0A0P0VJA8_ORYSJ	Os02g0498633 protein	Os02g0498633 OSNPB_020498633	Oryza sativa subsp. japonica (Rice)				EAHGKKR	1.0549	-0.00052908	0	0	0	0	0	0	0	9.05178	0	0	0	0	0	0	0	0	0	0	0	0	0	0	0	0	0	0	0
A0A0P0VJC7	A0A0P0VJC7_ORYSJ	Os02g0503900 protein (Putative cytochrome P450)	Os02g0503900 OJ1003_F04.10	Oryza sativa subsp. japonica (Rice)		membrane [GO:0016020]	heme binding [GO:0020037]; iron ion binding [GO:0005506]; monooxygenase activity [GO:0004497]; oxidoreductase activity, acting on paired donors, with incorporation or reduction of molecular oxygen [GO:0016705]	ELSDSRTRFLQR	0.98144	-10.686	0	0	0	0	0	0	0	0	0	0	0	0	0	0	0	0	0	0	0	0	0	0	0	0	0	0	0
A0A0P0VJE9	A0A0P0VJE9_ORYSJ	Os02g0499800 protein	Os02g0499800 OSNPB_020499800	Oryza sativa subsp. japonica (Rice)				RNRPYNREGWVIILGIPLR	0.98433	-13.648	0	0	0	0	0	0	0	0	0	0	8.94819	0	0	0	0	0	0	0	0	0	0	0	0	0	0	0	0
A0A0P0VJG2	A0A0P0VJG2_ORYSJ	Os02g0512800 protein	Os02g0512800 OSNPB_020512800	Oryza sativa subsp. japonica (Rice)				HFDAHHVSPLGRLRR	0.97603	-4.105	0	0	0	0	0	0	9.02793	0	0	0	0	0	0	0	0	0	0	0	0	0	0	0	0	0	9.7631	0	0
A0A0P0VJG6	A0A0P0VJG6_ORYSJ	Os02g0508500 protein	Os02g0508500 OSNPB_020508500	Oryza sativa subsp. japonica (Rice)				IWVRVEQQCR	0.97977	-6.8113	0	0	0	0	0	0	0	0	0	0	8.94351	0	9.16189	0	0	0	0	0	0	0	0	0	0	0	0	0	0
A0A0P0VJG7	A0A0P0VJG7_ORYSJ	Os02g0502850 protein	Os02g0502850 OSNPB_020502850	Oryza sativa subsp. japonica (Rice)				GLGTKEHPGR	0.97199	-3.2084	0	0	0	0	0	0	0	0	0	0	0	0	0	0	0	0	0	0	0	0	0	0	0	0	0	0	0
A0A0P0VJJ4	A0A0P0VJJ4_ORYSJ	Os02g0517476 protein	Os02g0517476 OSNPB_020517476	Oryza sativa subsp. japonica (Rice)				AGAGGPAP	0.9824	-0.48983	0	0	0	0	0	0	0	0	0	0	0	10.1759	0	10.8916	8.91483	0	0	0	0	10.1571	0	0	0	0	0	0	0
A0A0P0VJJ5	A0A0P0VJJ5_ORYSJ	Os02g0516600 protein	Os02g0516600 OSNPB_020516600	Oryza sativa subsp. japonica (Rice)		cytoplasm [GO:0005737]		ILELETVTQSEATR	0.98573	-10.086	0	0	0	0	0	0	0	0	0	0	0	0	0	0	0	0	0	0	0	0	0	0	0	0	0	0	0
A0A0P0VJK1	A0A0P0VJK1_ORYSJ	dihydrolipoyllysine-residue succinyltransferase (EC 2.3.1.61)	Os02g0514700 OSNPB_020514700	Oryza sativa subsp. japonica (Rice)	L-lysine catabolic process to acetyl-CoA via saccharopine [GO:0033512]; tricarboxylic acid cycle [GO:0006099]	mitochondrion [GO:0005739]; oxoglutarate dehydrogenase complex [GO:0045252]	dihydrolipoyllysine-residue succinyltransferase activity [GO:0004149]; hydroxycinnamoyltransferase activity [GO:0050734]	VPMPRLR	0.98303	-0.11512	0	0	0	0	0	0	0	0	0	0	0	0	0	0	0	0	0	0	0	0	0	0	0	0	0	0	0
A0A0P0VJM6	A0A0P0VJM6_ORYSJ	glycerophosphodiester phosphodiesterase (EC 3.1.4.46)	Os02g0514500 OSNPB_020514500	Oryza sativa subsp. japonica (Rice)	glycerol metabolic process [GO:0006071]; glycerophospholipid catabolic process [GO:0046475]		glycerophosphodiester phosphodiesterase activity [GO:0008889]	GGKPLLR	0.97612	-4.067	0	0	0	0	0	8.76606	0	0	0	0	0	0	0	0	0	0	0	0	0	0	0	0	0	0	0	0	0
A0A0P0VJN0	A0A0P0VJN0_ORYSJ	Os02g0517850 protein	Os02g0517850 OSNPB_020517850	Oryza sativa subsp. japonica (Rice)				THVHRRR	0.98458	-13.426	0	0	0	0	0	0	0	0	0	0	0	0	0	0	0	0	0	0	0	0	9.60383	0	0	0	0	0	0
A0A0P0VJQ1	A0A0P0VJQ1_ORYSJ	Os02g0522300 protein	Os02g0522300 OSNPB_020522300	Oryza sativa subsp. japonica (Rice)				EWFPNLRK	0.98238	-1.7021	0	0	0	0	0	0	0	0	0	0	0	0	0	0	0	0	0	0	0	0	0	0	0	0	0	0	0
A0A0P0VJR0	A0A0P0VJR0_ORYSJ	Os02g0524050 protein	Os02g0524050 OSNPB_020524050	Oryza sativa subsp. japonica (Rice)				KQTQLISR	0.97004	-1.8802	0	0	0	0	0	0	0	0	0	0	0	0	0	0	0	0	0	0	0	0	0	0	0	0	0	0	0
A0A0P0VJV7	A0A0P0VJV7_ORYSJ	Os02g0527950 protein	Os02g0527950 OSNPB_020527950	Oryza sativa subsp. japonica (Rice)				FKFCSLDFAVQLLGFCIK	0.98225	-10.393	0	0	0	0	0	0	0	0	0	0	0	0	0	0	0	0	0	0	0	0	0	0	0	0	0	0	0
A0A0P0VJW0	A0A0P0VJW0_ORYSJ	Uncharacterized protein OSJNBa0047A17.22	OSJNBa0047A17.22	Oryza sativa subsp. japonica (Rice)				CIVYVVFSP	0.98666	-9.6111	0	0	0	0	0	0	0	0	0	0	0	0	0	0	0	0	0	0	0	0	0	0	0	0	0	0	0
A0A0P0VJX9	A0A0P0VJX9_ORYSJ	Os02g0527600 protein	Os02g0527600 OSNPB_020527600	Oryza sativa subsp. japonica (Rice)	protein phosphorylation [GO:0006468]		ATP binding [GO:0005524]; protein serine/threonine kinase activity [GO:0004674]	EFLREVAIMK	0.98411	-9.2797	0	0	0	0	0	0	0	0	0	0	0	0	0	0	0	0	0	0	0	10.9296	0	0	0	9.56022	0	0	0
A0A0P0VJZ5	A0A0P0VJZ5_ORYSJ	Os02g0531900 protein	Os02g0531900 OSNPB_020531900	Oryza sativa subsp. japonica (Rice)	negative regulation of photomorphogenesis [GO:0010100]; regulation of abscisic acid-activated signaling pathway [GO:0009787]			IVELWRDIFVKK	0.98044	-7.7702	0	0	0	0	0	0	0	0	0	0	0	0	0	0	0	0	0	0	0	0	0	0	0	0	0	0	0
A0A0P0VK14	A0A0P0VK14_ORYSJ	Os02g0535801 protein	Os02g0535801 OSNPB_020535801	Oryza sativa subsp. japonica (Rice)				MPHVRVRFCK	0.9789	-6.8113	0	0	0	0	0	0	0	0	0	0	0	0	0	0	0	0	0	0	0	0	0	0	0	0	0	0	0
A0A0P0VK24	A0A0P0VK24_ORYSJ	Os02g0536300 protein	Os02g0536300 OSNPB_020536300	Oryza sativa subsp. japonica (Rice)				IQAQAVQVLEVK	0.9809	-16.313	0	0	0	0	0	0	0	0	0	0	9.63729	0	0	0	0	0	0	0	0	0	0	0	0	0	0	0	0
A0A0P0VK29	A0A0P0VK29_ORYSJ	Os02g0541150 protein	Os02g0541150 OSNPB_020541150	Oryza sativa subsp. japonica (Rice)				EDAGHGGLPLPGLLVVR	0.98136	-10.57	12.4125	0	0	0	0	0	0	0	0	0	0	0	0	0	0	0	0	0	0	0	0	0	0	0	0	0	0
A0A0P0VK43	A0A0P0VK43_ORYSJ	Os02g0541325 protein	Os02g0541325 OSNPB_020541325	Oryza sativa subsp. japonica (Rice)	carboxylic acid metabolic process [GO:0019752]; organonitrogen compound metabolic process [GO:1901564]		carboxy-lyase activity [GO:0016831]; pyridoxal phosphate binding [GO:0030170]	GYRGFQK	0.97338	-4.5019	0	0	0	0	0	0	0	0	0	0	0	0	0	0	14.9457	0	14.2639	0	0	0	0	14.8202	0	0	0	0	0
A0A0P0VK64	A0A0P0VK64_ORYSJ	Protein FAR1-RELATED SEQUENCE	Os02g0542200 OSNPB_020542200	Oryza sativa subsp. japonica (Rice)		nucleus [GO:0005634]	DNA-binding transcription factor activity [GO:0003700]; sequence-specific DNA binding [GO:0043565]; zinc ion binding [GO:0008270]	KWCPLRR	0.92208	-0.00052908	0	0	0	0	0	0	0	0	0	0	0	0	0	9.3585	0	0	0	0	0	0	0	0	0	0	0	0	9.13868
A0A0P0VK86	A0A0P0VK86_ORYSJ	Os02g0552550 protein	Os02g0552550 OSNPB_020552550	Oryza sativa subsp. japonica (Rice)				MSLGHNPEVAKAITQK	0.98539	-12.387	0	0	0	0	0	0	0	0	0	0	0	0	0	0	0	0	0	0	0	0	0	0	0	0	0	0	0
A0A0P0VK96	A0A0P0VK96_ORYSJ	Os02g0556050 protein	Os02g0556050 OSNPB_020556050	Oryza sativa subsp. japonica (Rice)				AAVARADRLVHER	0.98522	-9.0391	0	0	0	0	0	0	0	11.5607	0	0	0	0	0	0	0	0	0	0	0	0	0	14.5394	0	15.4435	0	0	0
A0A0P0VKC0	A0A0P0VKC0_ORYSJ	Os02g0556900 protein	Os02g0556900 OSNPB_020556900	Oryza sativa subsp. japonica (Rice)		nucleus [GO:0005634]		EKLSERVDQR	0.97406	-3.2085	0	0	0	0	0	0	0	0	0	0	0	0	0	0	0	0	0	0	0	0	0	0	0	10.1187	0	0	0
A0A0P0VKC4	A0A0P0VKC4_ORYSJ	Os02g0548801 protein	Os02g0548801 OSNPB_020548801	Oryza sativa subsp. japonica (Rice)				AFKPKRLS	0.97837	-1.7021	0	0	0	0	0	0	0	0	0	0	0	0	0	0	0	0	0	0	0	0	0	0	0	9.36317	0	0	0
A0A0P0VKD7	A0A0P0VKD7_ORYSJ	Os02g0559925 protein	Os02g0559925 OSNPB_020559925	Oryza sativa subsp. japonica (Rice)				VVQLNMFLRK	0.97885	-6.8113	0	0	0	0	0	0	0	0	0	0	0	0	0	0	0	0	0	0	0	0	0	0	0	0	0	0	0
A0A0P0VKD9	A0A0P0VKD9_ORYSJ	COX assembly mitochondrial protein	Os02g0560450 OSNPB_020560450	Oryza sativa subsp. japonica (Rice)		mitochondrion [GO:0005739]		REIAETNQE	0.97362	-2.4684	0	0	0	0	0	0	0	0	0	0	0	0	0	0	0	0	13.1437	0	0	0	0	0	0	0	0	0	0
A0A0P0VKF9	A0A0P0VKF9_ORYSJ	Os02g0561666 protein	Os02g0561666 OSNPB_020561666	Oryza sativa subsp. japonica (Rice)				NARLKYNF	0.97753	-1.7021	0	0	0	12.3625	0	0	0	0	0	0	0	0	0	0	0	0	0	0	0	0	0	0	0	0	0	0	0
A0A0P0VKI1	A0A0P0VKI1_ORYSJ	Os02g0563800 protein	Os02g0563800 OJ1712_E04.16 P0020C11.5	Oryza sativa subsp. japonica (Rice)				MMQQDSKRK	0.97678	-23.19	0	0	0	0	0	0	15.7642	0	0	0	0	0	0	0	15.4223	0	0	0	0	0	16.503	0	0	0	0	0	0
A0A0P0VKJ5	A0A0P0VKJ5_ORYSJ	Os02g0566300 protein	Os02g0566300 OSNPB_020566300	Oryza sativa subsp. japonica (Rice)				ELREEVGDIR	0.98364	-8.5133	0	0	0	0	0	0	0	0	0	0	0	0	0	0	0	0	0	0	0	0	0	0	0	0	0	0	0
A0A0P0VKK0	A0A0P0VKK0_ORYSJ	Hexosyltransferase (EC 2.4.1.-)	Os02g0556000 OSNPB_020556000	Oryza sativa subsp. japonica (Rice)	xylan biosynthetic process [GO:0045492]		glycosyltransferase activity [GO:0016757]	HRLDRTLLSK	0.98619	-9.3566	0	0	0	0	0	0	0	0	0	0	0	0	0	0	0	0	0	0	0	0	0	0	0	0	0	0	0
A0A0P0VKM7	A0A0P0VKM7_ORYSJ	Os02g0567850 protein	Os02g0567850 OSNPB_020567850	Oryza sativa subsp. japonica (Rice)				APLAATNQILRK	0.98701	-9.4717	0	0	0	0	0	0	0	0	0	0	0	0	0	0	0	0	0	0	0	0	0	0	0	0	0	0	0
A0A0P0VKN0	A0A0P0VKN0_ORYSJ	Os02g0572351 protein	Os02g0572351 OSNPB_020572351	Oryza sativa subsp. japonica (Rice)				RTMNTGKK	0.97775	-1.7021	0	0	0	10.5553	0	0	0	0	0	0	0	0	0	0	0	0	0	0	9.69817	0	0	0	0	0	0	0	0
A0A0P0VKQ3	A0A0P0VKQ3_ORYSJ	GTP cyclohydrolase II (EC 3.5.4.25)	Os02g0572400 OSNPB_020572400	Oryza sativa subsp. japonica (Rice)	riboflavin biosynthetic process [GO:0009231]		3,4-dihydroxy-2-butanone-4-phosphate synthase activity [GO:0008686]; GTP binding [GO:0005525]; GTP cyclohydrolase II activity [GO:0003935]; metal ion binding [GO:0046872]	RYLETKR	0.98494	-11.505	0	0	0	0	0	0	0	0	0	0	0	12.8168	0	0	0	0	0	0	0	0	10.5361	0	0	0	0	0	0
A0A0P0VKR7	A0A0P0VKR7_ORYSJ	Os02g0576100 protein	Os02g0576100 OSNPB_020576100	Oryza sativa subsp. japonica (Rice)				GFVSPSR	0.88525	-0.00052908	0	0	0	0	0	0	0	0	0	0	0	0	0	0	0	0	0	0	0	0	0	0	0	0	0	0	0
A0A0P0VKS7	A0A0P0VKS7_ORYSJ	Os02g0569800 protein	Os02g0569800 OSNPB_020569800	Oryza sativa subsp. japonica (Rice)				IDGSCQLLHLRR	0.98317	-10.957	0	0	0	0	0	0	0	0	0	0	0	0	0	0	0	0	0	0	0	0	0	0	0	0	0	0	0
A0A0P0VKU6	A0A0P0VKU6_ORYSJ	Os02g0581500 protein	Os02g0581500 OSNPB_020581500	Oryza sativa subsp. japonica (Rice)	menaquinone biosynthetic process [GO:0009234]		2-succinyl-6-hydroxy-2,4-cyclohexadiene-1-carboxylate synthase activity [GO:0070205]	ALSPSAR	0.9735	-2.4684	0	0	0	0	0	0	0	0	0	0	9.61703	0	0	0	0	0	0	0	0	0	0	0	0	0	0	0	0
A0A0P0VKY6	A0A0P0VKY6_ORYSJ	Os02g0585608 protein	Os02g0585608 OSNPB_020585608	Oryza sativa subsp. japonica (Rice)				HGHHHHILGSR	0.97787	-6.3608	0	0	0	0	0	0	0	0	0	0	0	0	0	0	9.98499	0	0	0	0	0	0	0	0	0	0	0	0
A0A0P0VL00	A0A0P0VL00_ORYSJ	Os02g0580000 protein	Os02g0580000 OSNPB_020580000	Oryza sativa subsp. japonica (Rice)				RESLTLAGRR	0.97334	-3.2084	0	0	0	0	0	0	0	0	0	0	0	0	0	9.52884	0	0	0	0	0	0	0	0	0	0	0	0	0
A0A0P0VL29	A0A0P0VL29_ORYSJ	Os02g0592300 protein	Os02g0592300 OsJ_07338 OSNPB_020592300	Oryza sativa subsp. japonica (Rice)	mismatch repair [GO:0006298]	mismatch repair complex [GO:0032300]	ATP binding [GO:0005524]; ATP hydrolysis activity [GO:0016887]; ATP-dependent DNA damage sensor activity [GO:0140664]; mismatched DNA binding [GO:0030983]	STLLSAYRYEQREK	0.97134	-1.8167	0	0	0	0	0	0	0	0	0	0	0	0	0	0	0	0	0	0	0	0	8.99772	0	0	0	0	0	0
A0A0P0VL48	A0A0P0VL48_ORYSJ	Os02g0594651 protein	Os02g0594651 OSNPB_020594651	Oryza sativa subsp. japonica (Rice)				RKLQETASLSAGIR	0.98704	-10.086	0	0	0	0	0	0	0	0	0	0	0	15.2533	0	0	0	0	0	0	0	0	0	0	0	0	0	0	0
A0A0P0VLA0	A0A0P0VLA0_ORYSJ	Amine oxidase (EC 1.4.3.-)	Os02g0593100 OSNPB_020593100	Oryza sativa subsp. japonica (Rice)	amine metabolic process [GO:0009308]		aminoacetone:oxygen oxidoreductase(deaminating) activity [GO:0052594]; copper ion binding [GO:0005507]; phenethylamine:oxygen oxidoreductase (deaminating) activity [GO:0052596]; primary amine oxidase activity [GO:0008131]; quinone binding [GO:0048038]; tryptamine:oxygen oxidoreductase (deaminating) activity [GO:0052593]	IMTRTQK	0.9	-0.00052908	0	0	0	0	0	0	0	0	0	0	0	0	0	0	0	0	0	0	0	0	0	0	0	0	0	0	0
A0A0P0VLA3	A0A0P0VLA3_ORYSJ	Os02g0600700 protein	Os02g0600700 OSNPB_020600700	Oryza sativa subsp. japonica (Rice)				RHLLPDRR	0.97569	-1.7021	0	0	0	0	0	0	0	0	0	0	0	0	0	0	0	0	0	0	0	0	0	0	0	0	10.0246	10.0151	0
A0A0P0VLC2	A0A0P0VLC2_ORYSJ	Os02g0600750 protein	Os02g0600750 OSNPB_020600750	Oryza sativa subsp. japonica (Rice)				MALCRGQVRGR	0.98172	-8.0623	0	0	0	0	0	0	0	0	0	0	0	14.7051	0	0	0	0	0	0	0	0	0	0	0	0	0	0	0
A0A0P0VLC5	A0A0P0VLC5_ORYSJ	Os02g0601901 protein	Os02g0601901 OSNPB_020601901	Oryza sativa subsp. japonica (Rice)				LAAAVASPSPLFSPK	0.98392	-14.435	0	0	0	0	0	0	0	0	0	0	0	0	0	0	0	0	0	0	0	0	0	9.87207	0	0	0	0	0
A0A0P0VLE6	A0A0P0VLE6_ORYSJ	Os02g0598200 protein	Os02g0598200 OSNPB_020598200	Oryza sativa subsp. japonica (Rice)		nucleus [GO:0005634]	DNA binding [GO:0003677]	IAVSVNR	0.96949	-2.0335	0	0	0	0	0	0	0	0	0	0	0	0	0	0	0	9.73808	0	0	0	0	0	0	0	0	0	0	10.1157
A0A0P0VLG2	A0A0P0VLG2_ORYSJ	Os02g0603066 protein	Os02g0603066 OSNPB_020603066	Oryza sativa subsp. japonica (Rice)				GAEAAQVVQER	0.9814	-10.095	0	0	0	0	0	0	0	0	0	0	0	0	0	0	0	0	0	0	0	0	0	0	0	0	0	0	0
A0A0P0VLG9	A0A0P0VLG9_ORYSJ	Os02g0611200 protein	Os02g0611200 OSNPB_020611200	Oryza sativa subsp. japonica (Rice)	spermidine biosynthetic process [GO:0008295]; spermine biosynthetic process [GO:0006597]		adenosylmethionine decarboxylase activity [GO:0004014]	SVLHCFADENTEK	0.98551	-9.2834	0	0	0	0	0	0	10.0478	0	0	0	0	0	0	0	0	0	0	0	0	0	0	0	0	0	0	0	0
A0A0P0VLH5	A0A0P0VLH5_ORYSJ	Acetolactate synthase small subunit (AHAS) (ALS) (EC 2.2.1.6) (Acetohydroxy-acid synthase small subunit)	Os02g0608550 OSNPB_020608550	Oryza sativa subsp. japonica (Rice)	isoleucine biosynthetic process [GO:0009097]; valine biosynthetic process [GO:0009099]	cytosol [GO:0005829]	acetolactate synthase activity [GO:0003984]; acetolactate synthase regulator activity [GO:1990610]	LVNVLNVSPLAPKFVGVM	0.98174	-10.393	0	0	0	0	0	0	0	0	0	0	0	0	0	0	0	0	0	0	0	0	0	0	0	0	11.7865	0	0
A0A0P0VLL3	A0A0P0VLL3_ORYSJ	Os02g0614250 protein	Os02g0614250 OSNPB_020614250	Oryza sativa subsp. japonica (Rice)				ARETEATEAPR	0.98172	-8.0623	0	0	0	0	0	0	0	0	0	0	0	0	0	0	0	0	0	0	0	0	0	0	0	0	0	0	0
A0A0P0VLM9	A0A0P0VLM9_ORYSJ	Os02g0608400 protein	Os02g0608400 OSNPB_020608400	Oryza sativa subsp. japonica (Rice)		mitochondrial inner membrane [GO:0005743]	ribosome binding [GO:0043022]	ISSRLLVK	0.96876	-1.4099	0	11.0254	0	0	0	10.1379	0	0	0	0	0	0	0	0	0	0	10.2068	0	0	0	0	0	0	0	0	0	0
A0A0P0VLN1	A0A0P0VLN1_ORYSJ	Os02g0614732 protein	Os02g0614732 OSNPB_020614732	Oryza sativa subsp. japonica (Rice)				TFRPATAVAARRTR	0.98765	-10.086	0	0	0	0	0	0	0	0	15.7822	0	14.9838	0	0	0	0	0	0	16.4608	0	0	0	15.4565	0	0	0	0	0
A0A0P0VLN3	A0A0P0VLN3_ORYSJ	Os02g0603300 protein	Os02g0603300 OSNPB_020603300	Oryza sativa subsp. japonica (Rice)				RCNASLAFVPWPK	0.98282	-10.985	0	0	0	0	0	0	0	0	0	0	0	0	0	0	0	0	0	0	0	0	0	11.3141	0	0	0	0	0
A0A0P0VLP9	A0A0P0VLP9_ORYSJ	Os02g0619801 protein	Os02g0619801 OSNPB_020619801	Oryza sativa subsp. japonica (Rice)				GFRCRCAVLVR	0.96984	-2.5454	0	0	0	0	0	0	0	0	0	0	0	0	0	0	0	0	0	0	0	0	0	0	0	0	0	0	0
A0A0P0VLQ1	A0A0P0VLQ1_ORYSJ	Os02g0610700 protein	Os02g0610700 OSNPB_020610700	Oryza sativa subsp. japonica (Rice)				QPGHTFYR	0.97547	-3.735	0	0	0	0	0	0	0	0	0	0	0	0	0	0	0	0	0	0	0	0	0	0	0	0	0	0	0
A0A0P0VLR3	A0A0P0VLR3_ORYSJ	Os02g0617700 protein	Os02g0617700 OSNPB_020617700	Oryza sativa subsp. japonica (Rice)	mRNA catabolic process [GO:0006402]		polyribonucleotide nucleotidyltransferase activity [GO:0004654]; RNA binding [GO:0003723]	QEVKRTSAK	0.96621	-1.3911	0	0	0	0	0	0	0	0	0	0	0	0	0	0	0	0	0	0	0	0	0	0	0	0	0	0	0
A0A0P0VLX9	A0A0P0VLX9_ORYSJ	Os02g0617800 protein	Os02g0617800 OSNPB_020617800	Oryza sativa subsp. japonica (Rice)		membrane [GO:0016020]		MNKPASHK	0.97569	-3.735	0	0	0	0	0	0	0	0	0	0	0	0	0	0	0	0	0	0	0	0	0	0	0	0	0	0	0
A0A0P0VLY2	A0A0P0VLY2_ORYSJ	Lysine--tRNA ligase (EC 6.1.1.6) (Lysyl-tRNA synthetase)	Os02g0623500 OSNPB_020623500	Oryza sativa subsp. japonica (Rice)	lysyl-tRNA aminoacylation [GO:0006430]	cytoplasm [GO:0005737]	ATP binding [GO:0005524]; lysine-tRNA ligase activity [GO:0004824]; nucleic acid binding [GO:0003676]	DVIAFPVLKIQQ	0.98689	-9.4717	0	0	0	0	0	0	0	0	0	0	0	0	0	0	0	0	0	0	0	0	0	0	0	0	0	0	0
A0A0P0VLY7	A0A0P0VLY7_ORYSJ	Os02g0617600 protein	Os02g0617600 OSNPB_020617600	Oryza sativa subsp. japonica (Rice)		protein phosphatase type 2A complex [GO:0000159]	protein phosphatase regulator activity [GO:0019888]	GGGGALR	0.97597	-3.6711	9.74369	0	0	0	0	0	0	0	0	0	0	0	0	0	0	0	0	0	0	0	0	0	0	0	0	0	0
A0A0P0VLZ4	A0A0P0VLZ4_ORYSJ	Os02g0616300 protein	Os02g0616300 OSNPB_020616300	Oryza sativa subsp. japonica (Rice)	RNA-mediated gene silencing [GO:0031047]			ALQGVFVETTHR	0.97502	-3.4819	0	0	0	0	0	0	0	0	0	0	0	0	0	0	0	0	0	0	0	0	0	0	0	0	0	0	0
A0A0P0VLZ9	A0A0P0VLZ9_ORYSJ	Os02g0620533 protein	Os02g0620533 OSNPB_020620533	Oryza sativa subsp. japonica (Rice)				VHAFHLCR	0.97557	-3.735	0	10.134	0	0	0	0	0	0	0	0	0	0	0	0	0	0	0	0	0	0	0	0	0	0	0	0	0
A0A0P0VM09	A0A0P0VM09_ORYSJ	Os02g0636851 protein	Os02g0636851 OSNPB_020636851	Oryza sativa subsp. japonica (Rice)				GDPGFAR	0.97043	-2.0335	0	13.3753	0	0	0	0	0	0	0	0	0	13.9327	0	0	0	0	13.8037	0	0	0	0	0	0	0	0	0	0
A0A0P0VM12	A0A0P0VM12_ORYSJ	Os02g0618525 protein	Os02g0618525 OSNPB_020618525	Oryza sativa subsp. japonica (Rice)				SSCRAPR	0.86275	-0.00052908	0	0	0	0	0	0	0	0	0	0	0	0	0	0	0	0	0	0	0	0	10.1586	0	0	0	0	0	0
A0A0P0VM13	A0A0P0VM13_ORYSJ	Glycosyltransferase (EC 2.4.1.-)	Os02g0634100 OSNPB_020634100	Oryza sativa subsp. japonica (Rice)			UDP-glycosyltransferase activity [GO:0008194]	HGEPHAR	0.98421	-14.192	0	0	0	0	0	0	0	0	0	0	0	0	0	0	0	11.7647	0	0	0	0	0	0	0	0	0	0	0
A0A0P0VM16	A0A0P0VM16_ORYSJ	Os02g0623000 protein	Os02g0623000 OSNPB_020623000	Oryza sativa subsp. japonica (Rice)	regulation of DNA-templated transcription [GO:0006355]	nucleus [GO:0005634]	zinc ion binding [GO:0008270]	DVQTFKMAMRVMNK	0.97718	-20.848	13.3447	0	0	0	0	0	0	12.8846	12.6767	13.3825	0	0	0	0	0	0	0	0	0	10.225	0	12.5714	13.7958	0	0	0	0
A0A0P0VM23	A0A0P0VM23_ORYSJ	Os02g0615800 protein	Os02g0615800 OSNPB_020615800	Oryza sativa subsp. japonica (Rice)	protein phosphorylation [GO:0006468]	membrane [GO:0016020]	ATP binding [GO:0005524]; protein kinase activity [GO:0004672]	VFDLEMRGAER	0.98179	-8.0623	0	0	0	0	0	0	0	0	0	0	0	0	0	0	0	0	0	0	0	0	0	0	0	0	0	0	0
A0A0P0VM24	A0A0P0VM24_ORYSJ	Os02g0630250 protein	Os02g0630250 OSNPB_020630250	Oryza sativa subsp. japonica (Rice)			nucleic acid binding [GO:0003676]; RNA-DNA hybrid ribonuclease activity [GO:0004523]	LRMHRPGLGMLR	0.98695	-9.4717	0	0	0	0	0	0	0	0	0	0	0	0	0	0	0	0	0	0	0	0	0	0	0	0	0	0	0
A0A0P0VM36	A0A0P0VM36_ORYSJ	Os02g0626100 protein	Os02g0626100 OSNPB_020626100	Oryza sativa subsp. japonica (Rice)			catalytic activity [GO:0003824]	KVLTMNPTGDLSSAR	0.98454	-10.701	0	0	0	0	0	0	0	0	0	0	0	0	0	0	0	0	0	0	0	0	0	0	0	0	0	0	0
A0A0P0VM45	A0A0P0VM45_ORYSJ	Os02g0639300 protein	Os02g0639300 OSNPB_020639300	Oryza sativa subsp. japonica (Rice)				VLPPSTPVAAALAALR	0.98366	-14.42	0	0	0	0	0	0	0	0	0	0	0	0	0	0	0	0	0	0	0	0	0	0	12.0374	0	0	0	0
A0A0P0VM78	A0A0P0VM78_ORYSJ	Os02g0632100 protein	Os02g0632100 OSNPB_020632100	Oryza sativa subsp. japonica (Rice)	cell surface receptor signaling pathway [GO:0007166]; protein phosphorylation [GO:0006468]	plasma membrane [GO:0005886]	ATP binding [GO:0005524]; protein kinase activity [GO:0004672]	EVEMRLQFLR	0.97399	-3.2089	0	0	0	0	0	0	0	0	0	0	0	0	0	0	0	0	0	0	0	0	0	0	0	0	10.504	0	0
A0A0P0VM80	A0A0P0VM80_ORYSJ	Phenylalanine ammonia-lyase (EC 4.3.1.24)	Os02g0626600 OSNPB_020626600	Oryza sativa subsp. japonica (Rice)	cinnamic acid biosynthetic process [GO:0009800]; L-phenylalanine catabolic process [GO:0006559]	cytoplasm [GO:0005737]	ammonia-lyase activity [GO:0016841]; phenylalanine ammonia-lyase activity [GO:0045548]	GEAHGGR	0.93407	-0.00052908	0	0	0	0	0	0	0	0	0	0	0	0	0	0	0	0	0	0	0	0	0	0	0	0	0	0	0
A0A0P0VMD9	A0A0P0VMD9_ORYSJ	Os02g0645725 protein	Os02g0645725 OSNPB_020645725	Oryza sativa subsp. japonica (Rice)				GEVHVLEERREGGR	0.98389	-12.631	0	0	0	0	0	0	0	0	0	0	0	0	0	0	0	0	0	0	0	0	0	11.3978	0	0	0	0	0
A0A0P0VME2	A0A0P0VME2_ORYSJ	Os02g0651300 protein	Os02g0651300 OSNPB_020651300	Oryza sativa subsp. japonica (Rice)		membrane [GO:0016020]		IFLHMEEIRRLR	0.98486	-11.721	0	0	0	0	0	0	0	0	0	0	0	0	0	0	0	0	0	0	0	0	0	0	12.3007	0	0	0	11.056
A0A0P0VMG5	A0A0P0VMG5_ORYSJ	Os02g0640600 protein	Os02g0640600 OSNPB_020640600	Oryza sativa subsp. japonica (Rice)				RPLAAVAVAPSRRR	0.98251	-15.269	0	0	0	0	0	0	0	0	0	0	0	0	0	0	0	0	0	0	9.63824	0	0	0	0	0	0	0	0
A0A0P0VMK1	A0A0P0VMK1_ORYSJ	Os02g0662900 protein	Os02g0662900 OSNPB_020662900	Oryza sativa subsp. japonica (Rice)				LFHQPKNRWQR	0.97833	-6.3608	0	0	0	0	0	0	0	11.8878	0	0	0	0	0	0	0	0	8.45175	0	0	0	0	0	0	0	0	0	0
A0A0P0VMK5	A0A0P0VMK5_ORYSJ	Trehalose 6-phosphate phosphatase (EC 3.1.3.12)	Os02g0661100 OSNPB_020661100	Oryza sativa subsp. japonica (Rice)	trehalose biosynthetic process [GO:0005992]		trehalose-phosphatase activity [GO:0004805]	NKVFEFVKLK	0.97595	-6.2452	0	10.5332	0	0	0	0	0	0	0	0	0	0	0	0	0	0	0	0	0	0	0	0	11.0765	0	0	0	0
A0A0P0VMN6	A0A0P0VMN6_ORYSJ	Os02g0665100 protein	Os02g0665100 OSNPB_020665100	Oryza sativa subsp. japonica (Rice)				LCSGKGKK	0.98175	-1.7021	0	0	0	0	0	0	0	0	0	0	0	0	0	0	0	0	0	0	0	14.2369	0	0	0	0	0	0	0
A0A0P0VMR4	A0A0P0VMR4_ORYSJ	Os02g0669900 protein	Os02g0669900 OSNPB_020669900	Oryza sativa subsp. japonica (Rice)				HAEEERLSR	0.97762	-18.408	0	0	0	0	0	0	0	0	0	0	0	0	0	0	0	0	0	13.3385	0	0	0	0	0	0	0	0	0
A0A0P0VMT1	A0A0P0VMT1_ORYSJ	Os02g0663300 protein	Os02g0663300 OSNPB_020663300	Oryza sativa subsp. japonica (Rice)				DRSWFISSLHK	0.98257	-10.097	0	9.33304	0	0	0	0	0	0	0	0	0	0	0	0	0	0	0	0	0	0	0	12.5766	0	0	10.6841	0	0
A0A0P0VMT4	A0A0P0VMT4_ORYSJ	Os02g0672500 protein	Os02g0672500 OSNPB_020672500	Oryza sativa subsp. japonica (Rice)	protein import into mitochondrial matrix [GO:0030150]	mitochondrial inner membrane [GO:0005743]; TIM23 mitochondrial import inner membrane translocase complex [GO:0005744]	protein transmembrane transporter activity [GO:0008320]	NPEGTQR	0.97981	-6.3935	0	0	0	0	0	0	0	0	0	0	0	0	0	0	0	0	0	14.5207	0	0	0	0	0	0	0	0	0
A0A0P0VMY7	A0A0P0VMY7_ORYSJ	Os02g0677450 protein	Os02g0677450 OSNPB_020677450	Oryza sativa subsp. japonica (Rice)				STVSGGR	0.97627	-3.6711	0	0	0	0	0	0	0	0	0	0	0	0	10.1733	0	0	0	0	0	0	0	0	0	0	0	0	0	0
A0A0P0VMZ9	A0A0P0VMZ9_ORYSJ	Alpha-1,3-glucosyltransferase (EC 2.4.1.-)	Os02g0688500	Oryza sativa subsp. japonica (Rice)	protein glycosylation [GO:0006486]	endoplasmic reticulum membrane [GO:0005789]	dolichyl pyrophosphate Glc1Man9GlcNAc2 alpha-1,3-glucosyltransferase activity [GO:0042283]	YWLALTHALPAR	0.98498	-11.505	0	8.94591	0	0	0	0	0	0	0	0	0	0	0	0	0	0	0	0	0	0	0	0	0	0	0	0	0
A0A0P0VN07	A0A0P0VN07_ORYSJ	Os02g0663200 protein	Os02g0663200 OSNPB_020663200	Oryza sativa subsp. japonica (Rice)				LHRPANRWR	0.97395	-2.4684	10.7285	0	0	0	0	0	0	0	0	0	0	0	0	0	0	0	0	0	0	0	0	0	0	0	0	0	0
A0A0P0VN15	A0A0P0VN15_ORYSJ	Os02g0678100 protein	Os02g0678100 OSNPB_020678100	Oryza sativa subsp. japonica (Rice)				ATNPGTR	0.97739	-3.7356	0	0	0	0	0	8.19155	0	0	0	0	0	0	0	0	0	0	0	0	0	0	0	0	12.0549	0	0	0	0
A0A0P0VN31	A0A0P0VN31_ORYSJ	Os02g0665350 protein	Os02g0665350 OSNPB_020665350	Oryza sativa subsp. japonica (Rice)				AAHHVVR	0.97116	-2.0335	0	0	0	0	0	0	0	0	0	0	0	0	14.4236	0	0	0	0	0	0	0	0	0	0	0	0	0	0
A0A0P0VN56	A0A0P0VN56_ORYSJ	Os02g0672300 protein	Os02g0672300 OSNPB_020672300	Oryza sativa subsp. japonica (Rice)		nucleus [GO:0005634]	DNA binding [GO:0003677]; DNA-binding transcription factor activity [GO:0003700]	GAARQYNRSK	0.97682	-22.563	0	0	0	9.41477	0	0	0	0	0	0	0	0	0	0	0	0	0	0	0	0	0	0	0	0	0	0	0
A0A0P0VN58	A0A0P0VN58_ORYSJ	Os02g0691650 protein	Os02g0691650 OSNPB_020691650	Oryza sativa subsp. japonica (Rice)				VAPHVLRVREELR	0.98637	-9.2834	0	15.6679	0	0	0	0	0	0	0	0	0	0	0	0	0	0	0	0	0	15.1546	0	0	0	0	0	0	0
A0A0P0VN91	A0A0P0VN91_ORYSJ	Os02g0694900 protein	Os02g0694900 OSNPB_020694900	Oryza sativa subsp. japonica (Rice)	protein phosphorylation [GO:0006468]	cytoplasm [GO:0005737]	ATP binding [GO:0005524]; protein serine/threonine kinase activity [GO:0004674]	DDGAALR	0.97457	-5.615	0	0	0	0	0	0	0	0	0	0	13.0475	0	0	0	0	0	0	0	0	11.212	0	0	0	0	15.8694	0	0
A0A0P0VNA7	A0A0P0VNA7_ORYSJ	Os02g0695700 protein	Os02g0695700 OsJ_08018 OSNPB_020695700	Oryza sativa subsp. japonica (Rice)				DLLDAARHTLGLLHR	0.98438	-8.0795	11.133	0	10.305	0	0	0	0	0	0	0	0	0	0	0	0	0	0	0	0	0	0	0	0	0	0	0	0
A0A0P0VNB7	A0A0P0VNB7_ORYSJ	Os02g0703600 protein	Os02g0703600 OSNPB_020703600	Oryza sativa subsp. japonica (Rice)		membrane [GO:0016020]	heme binding [GO:0020037]; iron ion binding [GO:0005506]; monooxygenase activity [GO:0004497]; oxidoreductase activity, acting on paired donors, with incorporation or reduction of molecular oxygen [GO:0016705]	NPNVFFNK	0.97585	-3.735	0	0	0	0	0	0	0	0	0	0	0	0	0	0	0	0	0	0	0	0	0	0	0	0	0	0	0
A0A0P0VNB8	A0A0P0VNB8_ORYSJ	Os02g0697550 protein	Os02g0697550 OSNPB_020697550	Oryza sativa subsp. japonica (Rice)				RPLRRAEQAER	0.98116	-8.0623	0	0	0	0	0	0	0	0	0	0	0	0	0	0	0	0	0	0	0	0	0	0	11.8066	0	0	0	0
A0A0P0VND6	A0A0P0VND6_ORYSJ	Os02g0699400 protein	Os02g0699400 OSNPB_020699400	Oryza sativa subsp. japonica (Rice)	guanosine tetraphosphate metabolic process [GO:0015969]			WETYARVYK	0.97414	-2.4684	0	0	0	0	0	0	0	0	0	0	0	0	0	0	0	12.4377	0	0	0	0	0	0	0	0	0	0	0
A0A0P0VNF4	A0A0P0VNF4_ORYSJ	Os02g0692800 protein	Os02g0692800 OSNPB_020692800	Oryza sativa subsp. japonica (Rice)				CYPLCLKRHR	0.97056	-5.1097	0	0	0	0	0	0	0	9.90126	0	0	0	0	0	0	0	0	0	0	0	0	0	0	0	0	0	0	0
A0A0P0VNG0	A0A0P0VNG0_ORYSJ	Os02g0696200 protein	Os02g0696200 OSNPB_020696200	Oryza sativa subsp. japonica (Rice)				QEVAHRQR	0.97194	-1.7021	0	0	0	0	0	0	0	0	0	0	0	0	0	0	0	0	0	12.6773	0	0	0	0	13.2192	0	0	0	0
A0A0P0VNK0	A0A0P0VNK0_ORYSJ	Os02g0697450 protein	Os02g0697450 OSNPB_020697450	Oryza sativa subsp. japonica (Rice)				RRLVVVDGDHGER	0.95483	-0.0010582	0	0	0	0	0	0	0	0	0	0	0	8.70708	0	0	0	0	0	0	0	0	0	0	0	0	0	0	0
A0A0P0VNR0	A0A0P0VNR0_ORYSJ	Os02g0704966 protein	Os02g0704966 OSNPB_020704966	Oryza sativa subsp. japonica (Rice)	DNA repair [GO:0006281]; DNA-templated DNA replication [GO:0006261]	DNA replication factor C complex [GO:0005663]; nucleus [GO:0005634]	DNA binding [GO:0003677]	FSDFTGK	0.97157	-2.034	0	0	0	0	0	8.89415	13.0133	0	0	0	0	0	0	0	0	0	0	0	10.2434	0	0	0	0	0	0	0	0
A0A0P0VNU3	A0A0P0VNU3_ORYSJ	Os02g0705551 protein	Os02g0705551 OSNPB_020705551	Oryza sativa subsp. japonica (Rice)				GVQNSSS	0.54545	-0.00052908	0	0	0	0	0	0	0	0	0	0	0	0	0	0	0	0	0	0	0	0	0	0	0	0	0	0	0
A0A0P0VNU5	A0A0P0VNU5_ORYSJ	Os02g0709400 protein	Os02g0709400 OSNPB_020709400	Oryza sativa subsp. japonica (Rice)		membrane [GO:0016020]	microtubule binding [GO:0008017]	DRVSSIARHIR	0.9751	-27.022	0	0	0	0	0	0	0	0	0	0	0	0	16.1926	0	0	0	0	0	0	0	0	0	0	0	0	0	0
A0A0P0VNW4	A0A0P0VNW4_ORYSJ	Os02g0719800 protein	Os02g0719800 OSNPB_020719800	Oryza sativa subsp. japonica (Rice)			RNA binding [GO:0003723]	LEPSRPGGTRR	0.98161	-10.608	0	0	0	0	0	0	0	0	0	0	0	0	0	0	0	0	0	0	0	0	0	0	0	0	0	0	0
A0A0P0VNW6	A0A0P0VNW6_ORYSJ	Os02g0725200 protein	Os02g0725200 OSNPB_020725200	Oryza sativa subsp. japonica (Rice)	methylation [GO:0032259]		methyltransferase activity [GO:0008168]	SDKCYKEK	0.98206	-15.552	0	0	0	0	0	0	0	0	0	0	0	0	0	0	0	0	0	0	0	0	0	0	0	0	12.5577	0	0
A0A0P0VNW8	A0A0P0VNW8_ORYSJ	Os02g0726400 protein	Os02g0726400 OSNPB_020726400	Oryza sativa subsp. japonica (Rice)				ARAFAGEAAKR	0.97747	-21.711	0	0	0	0	0	0	0	0	0	0	0	0	0	0	0	0	10.1221	0	0	0	0	0	0	0	0	0	10.0839
A0A0P0VNY2	A0A0P0VNY2_ORYSJ	Os02g0728800 protein	Os02g0728800 OSNPB_020728800	Oryza sativa subsp. japonica (Rice)	auxin-activated signaling pathway [GO:0009734]	plasma membrane [GO:0005886]; plasmodesma [GO:0009506]		VNETFWIAPAR	0.97988	-17.027	0	0	0	0	0	0	0	0	0	0	0	0	0	0	0	0	0	0	0	0	0	0	0	0	0	0	0
A0A0P0VNY9	A0A0P0VNY9_ORYSJ	Os02g0728100 protein	Os02g0728100 OSNPB_020728100	Oryza sativa subsp. japonica (Rice)	proteolysis [GO:0006508]		peptidase activity [GO:0008233]	CGWGKVDEIRR	0.98674	-9.3566	0	0	0	0	0	9.48129	0	0	0	0	0	0	0	0	0	0	0	0	0	0	0	0	0	0	0	0	0
A0A0P0VNZ1	A0A0P0VNZ1_ORYSJ	Clustered mitochondria protein homolog	Os02g0717400 OJ1191_G08.42 OJ2056_H01.14	Oryza sativa subsp. japonica (Rice)	mitochondrion organization [GO:0007005]; organelle localization [GO:0051640]	cytoplasm [GO:0005737]; intracellular organelle [GO:0043229]	RNA binding [GO:0003723]; translation initiation factor activity [GO:0003743]	GFREILDR	0.97352	-5.8441	15.9978	0	0	0	0	0	0	16.0831	0	10.6178	11.0859	0	16.0438	0	16.0586	0	0	0	0	0	0	0	0	0	0	0	0
A0A0P0VNZ9	A0A0P0VNZ9_ORYSJ	Os02g0722250 protein	Os02g0722250 OSNPB_020722250	Oryza sativa subsp. japonica (Rice)		cytosol [GO:0005829]	ATP binding [GO:0005524]; eukaryotic translation initiation factor 2alpha kinase activity [GO:0004694]; protein kinase activity [GO:0004672]	LSAVEIKEHFSSHK	0.95622	-0.0010634	0	0	0	0	0	0	0	0	0	0	0	0	0	0	0	0	0	0	0	0	0	0	0	0	0	0	0
A0A0P0VP32	A0A0P0VP32_ORYSJ	Os02g0711350 protein	Os02g0711350 OSNPB_020711350	Oryza sativa subsp. japonica (Rice)				ESTKDIVDVLLSFFA	0.98405	-10.701	0	0	0	0	0	0	0	0	0	0	0	0	0	10.807	0	0	0	0	0	0	0	0	0	0	0	0	0
A0A0P0VP35	A0A0P0VP35_ORYSJ	Os02g0730200 protein	Os02g0730200 OSNPB_020730200	Oryza sativa subsp. japonica (Rice)	spliceosomal tri-snRNP complex assembly [GO:0000244]	U4/U6 x U5 tri-snRNP complex [GO:0046540]		LSHVYSQK	0.9755	-3.735	0	0	0	0	0	0	0	0	0	0	0	0	0	0	0	0	0	0	0	0	0	0	0	0	0	0	0
A0A0P0VP49	A0A0P0VP49_ORYSJ	Os02g0730400 protein (Putative NHL repeat-containing protein)	Os02g0730400 OsJ_08258 OSJNBa0072H09.38 P0617A09.17	Oryza sativa subsp. japonica (Rice)		membrane [GO:0016020]		GFTVDGR	0.97791	-18.085	0	0	0	0	0	0	0	0	0	0	0	0	0	0	0	0	0	0	0	0	0	0	0	0	0	0	0
A0A0P0VP55	A0A0P0VP55_ORYSJ	Os02g0729566 protein	Os02g0729566 OSNPB_020729566	Oryza sativa subsp. japonica (Rice)				EAMYAIRKSQLR	0.98441	-11.252	0	0	0	0	0	0	0	0	0	0	0	0	0	0	0	0	0	0	0	0	0	0	0	0	0	14.7457	0
A0A0P0VP89	A0A0P0VP89_ORYSJ	Os02g0734733 protein	Os02g0734733 OSNPB_020734733	Oryza sativa subsp. japonica (Rice)				QWRGQLRLPR	0.97577	-6.2452	15.4098	16.7869	16.8809	0	16.0423	16.6865	16.5727	0	16.5525	14.8632	0	16.8881	0	16.3068	0	0	0	17.2591	17.3175	17.3486	0	17.4479	17.5273	0	16.9931	16.8867	16.9288
A0A0P0VP92	A0A0P0VP92_ORYSJ	Os02g0739900 protein	Os02g0739900 OSNPB_020739900	Oryza sativa subsp. japonica (Rice)		microtubule [GO:0005874]	microtubule binding [GO:0008017]	TPLRRHALR	0.97084	-2.4684	0	0	0	0	0	0	0	0	0	0	0	0	0	0	0	0	0	0	0	0	0	0	0	13.0215	0	0	0
A0A0P0VPA2	A0A0P0VPA2_ORYSJ	RNA helicase (EC 3.6.4.13)	Os02g0736600 P0487D09.24	Oryza sativa subsp. japonica (Rice)			ATP binding [GO:0005524]; hydrolase activity [GO:0016787]; nucleic acid binding [GO:0003676]; RNA helicase activity [GO:0003724]	CTEPRSVSHGK	0.98443	-12.502	0	8.6805	0	0	0	0	0	0	8.97685	0	0	0	0	0	0	0	9.01558	8.70131	0	0	9.70373	9.43321	0	9.47796	0	0	10.0631
A0A0P0VPB5	A0A0P0VPB5_ORYSJ	O-fucosyltransferase family protein	B1121A12.18	Oryza sativa subsp. japonica (Rice)	fucose metabolic process [GO:0006004]		transferase activity [GO:0016740]	MRPWVLR	0.97361	-5.8274	0	0	0	0	0	0	0	0	0	0	13.3298	0	0	0	0	0	0	0	0	0	0	0	0	0	0	0	0
A0A0P0VPB7	A0A0P0VPB7_ORYSJ	Os02g0721901 protein	Os02g0721901 OSNPB_020721901	Oryza sativa subsp. japonica (Rice)				HSAAHFPLPSLLQR	0.98756	-0.72726	0	0	0	0	0	0	0	0	0	0	0	8.74534	8.55934	8.80948	8.44997	8.87544	0	0	0	0	8.59828	0	0	0	0	8.69021	8.62256
A0A0P0VPC7	A0A0P0VPC7_ORYSJ	Os02g0735800 protein	Os02g0735800	Oryza sativa subsp. japonica (Rice)	RNA modification [GO:0009451]		RNA binding [GO:0003723]	LCGSQRYKEYGR	0.97803	-18.02	0	0	0	0	0	0	0	0	0	0	0	0	0	0	0	0	0	0	9.21361	0	10.0509	0	0	0	0	0	0
A0A0P0VPD3	A0A0P0VPD3_ORYSJ	Os02g0744150 protein	Os02g0744150 OSNPB_020744150	Oryza sativa subsp. japonica (Rice)				MPALKRAMR	0.97085	-2.4684	0	0	0	0	0	0	0	0	0	0	0	0	0	0	0	0	8.93133	0	0	0	0	0	0	0	0	0	0
A0A0P0VPD7	A0A0P0VPD7_ORYSJ	Os02g0744851 protein	Os02g0744851 OSNPB_020744851	Oryza sativa subsp. japonica (Rice)				KRSLSFELDLAVEE	0.95615	-0.00076449	0	0	0	0	0	0	0	0	0	0	0	0	0	0	0	0	0	0	0	0	0	0	0	0	0	0	0
A0A0P0VPG9	A0A0P0VPG9_ORYSJ	Os02g0740800 protein	Os02g0740800 OSNPB_020740800	Oryza sativa subsp. japonica (Rice)				VDGVVVR	0.81818	-0.00052908	0	0	0	0	0	0	0	0	0	0	0	0	0	0	0	0	0	0	0	0	0	0	0	0	0	0	0
A0A0P0VPH0	A0A0P0VPH0_ORYSJ	Os02g0738750 protein	Os02g0738750 OSNPB_020738750	Oryza sativa subsp. japonica (Rice)				VRREEER	0.80357	-0.00052908	0	0	0	0	0	0	0	0	0	0	0	0	0	0	0	0	0	0	0	0	0	0	0	0	0	0	0
A0A0P0VPN7	A0A0P0VPN7_ORYSJ	Os02g0755750 protein	Os02g0755750 OSNPB_020755750	Oryza sativa subsp. japonica (Rice)				KHHNSPAATTMK	0.98723	-9.4717	0	10.2248	0	0	0	0	0	0	0	0	0	0	0	0	0	0	0	0	0	0	0	0	0	0	10.471	0	0
A0A0P0VPP6	A0A0P0VPP6_ORYSJ	Os02g0747600 protein	Os02g0747600 OSNPB_020747600	Oryza sativa subsp. japonica (Rice)		nucleus [GO:0005634]	DNA binding [GO:0003677]; DNA-binding transcription factor activity [GO:0003700]	DGRWQARIGLVAGTR	0.97319	-2.2504	0	0	0	0	9.31633	0	0	0	0	0	0	0	0	0	0	0	0	0	0	0	0	13.6928	0	0	0	0	0
A0A0P0VPQ5	A0A0P0VPQ5_ORYSJ	Os02g0752000 protein	Os02g0752000 OSNPB_020752000	Oryza sativa subsp. japonica (Rice)				EETVAVSDK	0.97726	-3.4356	0	0	0	0	0	0	0	0	0	0	0	0	0	0	0	10.6862	0	0	0	0	0	0	0	0	0	0	0
A0A0P0VPQ9	A0A0P0VPQ9_ORYSJ	Os02g0759800 protein	Os02g0759800 OSNPB_020759800	Oryza sativa subsp. japonica (Rice)	mRNA splicing, via spliceosome [GO:0000398]	spliceosomal complex [GO:0005681]		ELQLKEKER	0.97473	-2.4684	0	0	0	0	0	0	0	0	0	0	0	0	0	0	0	0	0	0	0	0	0	0	0	0	0	0	0
A0A0P0VPR1	A0A0P0VPR1_ORYSJ	Os02g0753900 protein	Os02g0753900 OSNPB_020753900	Oryza sativa subsp. japonica (Rice)	circadian rhythm [GO:0007623]; regulation of DNA-templated transcription [GO:0006355]			ARIRDALYR	0.97338	-2.4684	0	0	0	0	0	0	0	0	0	0	0	0	0	0	0	0	0	0	0	0	0	0	0	0	0	0	0
A0A0P0VPS3	A0A0P0VPS3_ORYSJ	Os02g0754650 protein	Os02g0754650 OSNPB_020754650	Oryza sativa subsp. japonica (Rice)				GAPRVSTRQR	0.98443	-8.5133	0	0	0	0	0	0	0	0	0	0	0	0	0	10.4276	0	0	0	0	0	0	10.889	0	0	0	0	0	0
A0A0P0VPW0	A0A0P0VPW0_ORYSJ	Os02g0767800 protein	Os02g0767800 OSNPB_020767800	Oryza sativa subsp. japonica (Rice)		nucleus [GO:0005634]	DNA binding [GO:0003677]; DNA-binding transcription factor activity [GO:0003700]	LLCSLVRTIAISISIER	0.98187	-10.57	0	0	0	0	0	0	0	0	0	0	0	0	0	0	8.67066	0	0	0	0	0	0	0	0	0	0	0	0
A0A0P0VPW2	A0A0P0VPW2_ORYSJ	Os02g0768500 protein	Os02g0768500 OSNPB_020768500	Oryza sativa subsp. japonica (Rice)				DGSELRDDGQALR	0.971	-2.2492	0	0	0	0	9.59962	0	0	0	0	0	0	0	0	0	0	0	0	0	0	0	0	0	0	0	0	0	0
A0A0P0VPX6	A0A0P0VPX6_ORYSJ	Os02g0765925 protein	Os02g0765925 OSNPB_020765925	Oryza sativa subsp. japonica (Rice)				RRALQHAVR	0.97407	-2.4684	0	0	0	0	0	0	0	0	0	0	0	0	0	0	0	0	0	0	0	0	0	0	0	0	0	0	0
A0A0P0VQ33	A0A0P0VQ33_ORYSJ	Os02g0763501 protein	Os02g0763501 OSNPB_020763501	Oryza sativa subsp. japonica (Rice)				TSAARPWRRPR	0.98095	-16.125	0	0	0	0	0	0	0	16.3802	0	0	16.2046	0	14.9975	0	16.1434	0	0	0	15.1529	0	17.2869	0	0	0	0	0	0
A0A0P0VQ67	A0A0P0VQ67_ORYSJ	Os02g0765950 protein	Os02g0765950 OSNPB_020765950	Oryza sativa subsp. japonica (Rice)				ANVGAAS	0.73684	-0.00052908	0	0	0	0	0	0	0	0	0	0	0	0	0	0	0	8.59965	0	0	0	0	0	0	0	0	0	0	0
A0A0P0VQ73	A0A0P0VQ73_ORYSJ	Os02g0779650 protein	Os02g0779650 OSNPB_020779650	Oryza sativa subsp. japonica (Rice)				DLARIRPPIAASLPQRWR	0.98239	-10.393	0	0	0	0	0	0	0	0	0	0	0	0	0	0	0	0	0	0	0	0	0	0	0	0	0	0	0
A0A0P0VQA0	A0A0P0VQA0_ORYSJ	Os02g0760200 protein	Os02g0760200 OSNPB_020760200	Oryza sativa subsp. japonica (Rice)				ELFHLYIVLWIEDK	0.97285	-2.3159	0	0	0	0	0	0	0	0	0	0	0	0	0	0	0	0	0	0	0	0	0	0	0	0	0	0	0
A0A0P0VQD7	A0A0P0VQD7_ORYSJ	Os02g0774700 protein	Os02g0774700 OSNPB_020774700	Oryza sativa subsp. japonica (Rice)				HEWAGYPLRSR	0.98163	-8.0623	0	0	0	0	0	0	0	0	0	0	0	0	0	0	0	9.17165	0	0	0	0	0	0	0	0	0	0	10.3335
A0A0P0VQE0	A0A0P0VQE0_ORYSJ	Os02g0781966 protein	Os02g0781966 OSNPB_020781966	Oryza sativa subsp. japonica (Rice)				SSRDVGSWR	0.9746	-2.4684	0	0	0	0	0	0	0	0	0	0	0	0	0	0	0	0	0	0	0	0	0	0	0	0	0	0	0
A0A0P0VQE5	A0A0P0VQE5_ORYSJ	Os02g0778200 protein	Os02g0778200 OSNPB_020778200	Oryza sativa subsp. japonica (Rice)	tRNA aminoacylation for protein translation [GO:0006418]		aminoacyl-tRNA ligase activity [GO:0004812]; ATP binding [GO:0005524]; tRNA binding [GO:0000049]	TGKLIGSSLEAK	0.98744	-9.4717	0	0	0	0	0	0	0	0	0	0	0	0	0	0	0	0	0	0	0	0	0	0	10.9758	0	0	0	0
A0A0P0VQG9	A0A0P0VQG9_ORYSJ	Os02g0790500 protein	Os02g0790500 OSNPB_020790500	Oryza sativa subsp. japonica (Rice)				ASAAAGLVRR	0.98347	-14.581	0	0	0	0	0	0	0	0	0	0	0	0	0	0	0	0	0	0	0	0	0	0	0	0	12.5509	0	0
A0A0P0VQH0	A0A0P0VQH0_ORYSJ	Os02g0790101 protein	Os02g0790101 OSNPB_020790101	Oryza sativa subsp. japonica (Rice)				MVSVLRGSSDGRR	0.9861	-9.2834	0	0	0	0	0	0	0	0	0	0	0	0	0	0	0	0	0	0	0	12.0292	0	0	0	13.2599	0	0	0
A0A0P0VQH1	A0A0P0VQH1_ORYSJ	Os02g0780101 protein	Os02g0780101 OSNPB_020780101	Oryza sativa subsp. japonica (Rice)	proteolysis [GO:0006508]		serine-type endopeptidase activity [GO:0004252]	RRHAQGGTTK	0.98022	-6.8113	0	0	13.2055	0	0	0	0	0	0	0	0	0	0	0	0	0	0	0	0	0	0	0	0	0	0	0	10.9516
A0A0P0VQL1	A0A0P0VQL1_ORYSJ	protein-serine/threonine phosphatase (EC 3.1.3.16)	Os02g0796100 OSNPB_020796100	Oryza sativa subsp. japonica (Rice)	dephosphorylation of RNA polymerase II C-terminal domain [GO:0070940]	nucleus [GO:0005634]	myosin phosphatase activity [GO:0017018]; RNA polymerase II CTD heptapeptide repeat phosphatase activity [GO:0008420]	RSAPRWSSSTTR	0.98208	-7.7702	8.53376	0	0	0	0	0	0	0	0	0	0	0	0	0	0	0	0	0	0	0	0	0	0	0	0	0	0
A0A0P0VQM3	A0A0P0VQM3_ORYSJ	Formin-like protein	Os02g0794900 OSNPB_020794900	Oryza sativa subsp. japonica (Rice)			phosphoprotein phosphatase activity [GO:0004721]	VLFSTPKRSNVVR	0.98283	-10.985	0	0	0	0	0	0	0	0	0	0	0	0	0	0	0	0	0	0	0	0	0	0	0	0	0	0	0
A0A0P0VQN6	A0A0P0VQN6_ORYSJ	Os02g0793000 protein	Os02g0793000 OSNPB_020793000	Oryza sativa subsp. japonica (Rice)				DAEEGLLHLKRSR	0.98603	-9.2834	0	0	0	0	0	0	0	0	0	0	0	0	0	0	0	0	0	0	0	0	0	0	0	0	0	0	0
A0A0P0VQQ1	A0A0P0VQQ1_ORYSJ	Os02g0779850 protein	Os02g0779850 OSNPB_020779850	Oryza sativa subsp. japonica (Rice)				WAPTRLCHLK	0.97955	-6.8113	0	0	0	0	0	0	0	0	0	0	0	0	0	0	0	0	0	0	0	0	0	0	0	0	0	0	0
A0A0P0VQV8	A0A0P0VQV8_ORYSJ	Os02g0797425 protein	Os02g0797425 OSNPB_020797425	Oryza sativa subsp. japonica (Rice)				HRFHTSAVLAEQR	0.88542	-0.00052908	0	0	12.2249	0	0	0	12.7224	0	0	0	0	0	12.0624	0	0	0	0	0	13.3803	0	0	13.5647	14.2399	0	12.5892	0	0
A0A0P0VQX5	A0A0P0VQX5_ORYSJ	Os02g0806350 protein	Os02g0806350 OSNPB_020806350	Oryza sativa subsp. japonica (Rice)				QHDAGVR	0.98063	-6.3935	0	0	0	0	8.56792	0	0	0	0	0	0	0	0	0	0	0	0	0	0	0	0	0	0	0	0	0	0
A0A0P0VQZ4	A0A0P0VQZ4_ORYSJ	Os02g0808100 protein	Os02g0808100 OSNPB_020808100	Oryza sativa subsp. japonica (Rice)	cell surface receptor signaling pathway [GO:0007166]; protein phosphorylation [GO:0006468]	plasma membrane [GO:0005886]	ATP binding [GO:0005524]; protein serine/threonine kinase activity [GO:0004674]	DPEVDIALDTR	0.97848	-6.3608	0	0	0	0	0	0	0	0	0	0	0	0	0	0	0	0	0	0	0	0	0	0	0	0	0	0	0
A0A0P0VR11	A0A0P0VR11_ORYSJ	Os02g0807200 protein	Os02g0807200 OSNPB_020807200	Oryza sativa subsp. japonica (Rice)	cell surface receptor signaling pathway [GO:0007166]; protein phosphorylation [GO:0006468]	plasma membrane [GO:0005886]	ATP binding [GO:0005524]; calcium ion binding [GO:0005509]; polysaccharide binding [GO:0030247]; protein serine/threonine kinase activity [GO:0004674]	MTHPPDLGIFALQK	0.98787	-10.086	0	0	0	0	0	0	0	0	0	0	13.3652	0	0	0	0	0	0	0	12.7423	0	0	0	0	0	0	0	0
A0A0P0VR31	A0A0P0VR31_ORYSJ	Os02g0811101 protein	Os02g0811101 OSNPB_020811101	Oryza sativa subsp. japonica (Rice)		membrane [GO:0016020]		KSERPTAYKANSK	0.98304	-10.985	0	0	0	0	0	0	0	0	0	0	0	0	0	0	0	0	0	0	0	0	0	0	0	0	0	0	0
A0A0P0VR50	A0A0P0VR50_ORYSJ	Os02g0808000 protein	Os02g0808000 OSNPB_020808000	Oryza sativa subsp. japonica (Rice)				QWLTRRWSHR	0.97949	-6.8113	0	10.0765	0	0	0	0	0	0	0	0	0	0	0	0	0	0	0	0	0	0	0	0	0	0	0	0	0
A0A0P0VRB8	A0A0P0VRB8_ORYSJ	Os02g0822100 protein	Os02g0822100 OSNPB_020822100	Oryza sativa subsp. japonica (Rice)	transmembrane transport [GO:0055085]	membrane [GO:0016020]		GGVGGGVRMK	0.97215	-3.2084	0	0	0	0	0	0	0	0	0	0	0	0	0	0	0	0	0	0	0	0	0	0	0	0	0	0	0
A0A0P0VRD5	A0A0P0VRD5_ORYSJ	Os02g0822900 protein	Os02g0822900 OSNPB_020822900	Oryza sativa subsp. japonica (Rice)	protein phosphorylation [GO:0006468]		ATP binding [GO:0005524]; protein kinase activity [GO:0004672]; ubiquitin-protein transferase activity [GO:0004842]	DAIHHWRLRR	0.97905	-6.8113	0	0	0	0	0	0	0	0	0	0	0	0	0	0	0	0	0	0	0	0	0	0	0	0	0	0	0
A0A0P0VRE6	A0A0P0VRE6_ORYSJ	Os02g0811700 protein	Os02g0811700 OSNPB_020811700	Oryza sativa subsp. japonica (Rice)				HLSDHAQLLCCQR	0.98611	-9.2834	0	0	0	0	0	0	0	0	0	0	0	0	0	0	0	0	0	0	0	0	0	0	0	0	0	0	0
A0A0P0VRE8	A0A0P0VRE8_ORYSJ	Os02g0823050 protein	Os02g0823050 OSNPB_020823050	Oryza sativa subsp. japonica (Rice)				MVPTAISHK	0.97057	-2.7229	0	0	0	0	0	10.8663	0	0	0	0	0	0	0	0	0	0	0	0	0	0	0	0	0	0	0	0	0
A0A0P0VRF6	A0A0P0VRF6_ORYSJ	Os02g0819400 protein	Os02g0819400 OSNPB_020819400	Oryza sativa subsp. japonica (Rice)				YIKYIRNIR	0.97416	-2.4684	12.0458	0	0	0	0	0	0	0	0	0	0	0	0	0	0	0	0	0	0	0	0	0	0	0	0	0	0
A0A0P0VRG4	A0A0P0VRG4_ORYSJ	Os02g0825433 protein	Os02g0825433 OSNPB_020825433	Oryza sativa subsp. japonica (Rice)		membrane [GO:0016020]		AGAGAKSLQVATPAR	0.98472	-12.402	0	0	0	0	0	0	16.0842	0	0	0	0	0	0	0	0	0	0	0	0	0	0	0	0	0	0	0	0
A0A0P0VRH8	A0A0P0VRH8_ORYSJ	Os02g0827500 protein	Os02g0827500 OSNPB_020827500	Oryza sativa subsp. japonica (Rice)	lipid transport [GO:0006869]	endoplasmic reticulum [GO:0005783]	lipid binding [GO:0008289]	ARMMDFGK	0.98436	-8.5133	0	0	0	0	0	0	0	0	0	0	0	12.1372	0	0	0	0	11.8449	0	0	0	0	0	0	0	0	0	0
A0A0P0VRI1	A0A0P0VRI1_ORYSJ	Os02g0826700 protein	Os02g0826700 OSNPB_020826700	Oryza sativa subsp. japonica (Rice)				LLNFRSQQIALR	0.98725	-9.4717	0	0	0	0	0	0	0	0	0	0	0	0	0	0	0	0	0	0	0	0	0	0	0	0	0	0	0
A0A0P0VRI3	A0A0P0VRI3_ORYSJ	Os02g0826500 protein	Os02g0826500 OSNPB_020826500	Oryza sativa subsp. japonica (Rice)			ATP binding [GO:0005524]; ATP hydrolysis activity [GO:0016887]	QEEAHLVQR	0.97527	-4.5014	0	0	0	0	0	0	0	0	0	0	0	0	0	0	0	0	0	0	0	0	0	0	0	0	0	0	10.0646
A0A0P0VRL6	A0A0P0VRL6_ORYSJ	Os02g0828400 protein	Os02g0828400 OSNPB_020828400	Oryza sativa subsp. japonica (Rice)				GTWYRLIPR	0.97445	-2.4684	0	0	0	0	0	0	0	0	0	0	0	0	0	0	0	0	0	0	0	0	0	0	0	0	0	0	10.6402
A0A0P0VRL8	A0A0P0VRL8_ORYSJ	Os02g0831300 protein	Os02g0831300 OsJ_08995 OSNPB_020831300	Oryza sativa subsp. japonica (Rice)		nucleus [GO:0005634]		MDAAHKR	0.98311	-15.459	0	0	0	0	0	0	0	0	0	0	0	0	0	0	0	0	0	0	0	0	0	0	0	0	0	0	0
A0A0P0VRM2	A0A0P0VRM2_ORYSJ	Os02g0828600 protein	Os02g0828600 OSNPB_020828600	Oryza sativa subsp. japonica (Rice)				MNTRATR	0.86667	-0.00052908	0	15.0686	0	0	14.7569	0	0	0	0	0	0	0	0	0	0	0	0	0	0	0	0	0	0	0	0	0	0
A0A0P0VRM5	A0A0P0VRM5_ORYSJ	Os02g0831000 protein	Os02g0831000 OSNPB_020831000	Oryza sativa subsp. japonica (Rice)				HRNLWCR	0.97797	-18.535	0	0	0	0	0	0	0	0	0	0	0	0	0	0	0	0	0	0	0	0	0	0	0	0	0	0	10.9352
A0A0P0VRU2	A0A0P0VRU2_ORYSJ	sucrose synthase (EC 2.4.1.13)	Os02g0831500 OSNPB_020831500	Oryza sativa subsp. japonica (Rice)	sucrose metabolic process [GO:0005985]		sucrose synthase activity [GO:0016157]	QQLLDELDKSVDDKADK	0.98134	-10.57	0	0	0	0	10.8365	0	0	0	0	0	0	0	0	0	0	0	0	0	0	0	0	0	0	0	0	0	0
A0A0P0VRU6	A0A0P0VRU6_ORYSJ	Os03g0100700 protein	Os03g0100700 OSNPB_030100700	Oryza sativa subsp. japonica (Rice)				GGGGGSR	0.97712	-3.9289	0	0	0	0	0	0	0	0	0	0	0	0	0	0	0	0	0	0	0	0	0	0	0	0	12.8491	0	0
A0A0P0VRV0	A0A0P0VRV0_ORYSJ	UDP-glucoronosyl/UDP-glucosyl transferase family protein-like	P0452F04.33-1	Oryza sativa subsp. japonica (Rice)			transferase activity [GO:0016740]	GFIDLAGNVFNEMQGK	0.9842	-12.758	0	0	0	0	0	0	0	0	0	0	0	9.58417	0	0	0	0	0	0	0	0	0	0	0	0	0	0	10.2404
A0A0P0VRX8	A0A0P0VRX8_ORYSJ	Os03g0105401 protein	Os03g0105401 OSNPB_030105401	Oryza sativa subsp. japonica (Rice)				FLPDKSNAICGNK	0.98417	-10.985	0	0	0	0	0	0	0	0	0	0	0	0	0	0	0	0	0	0	0	0	0	0	0	0	0	10.5169	0
A0A0P0VS07	A0A0P0VS07_ORYSJ	Os02g0831100 protein	Os02g0831100 OSNPB_020831100	Oryza sativa subsp. japonica (Rice)				QRRLNNPR	0.9845	-8.5133	0	0	0	0	0	0	0	0	0	0	0	10.9492	0	0	0	0	0	0	0	0	0	0	0	0	0	0	0
A0A0P0VS22	A0A0P0VS22_ORYSJ	Os03g0108200 protein	Os03g0108200 OSNPB_030108200	Oryza sativa subsp. japonica (Rice)	interstrand cross-link repair [GO:0036297]; protein ubiquitination [GO:0016567]	nucleus [GO:0005634]	ubiquitin protein ligase activity [GO:0061630]	SLWYRIPTR	0.97434	-2.4684	0	0	0	9.51094	0	0	0	0	0	0	0	0	0	0	0	0	0	0	0	0	0	0	0	0	8.82896	0	0
A0A0P0VS29	A0A0P0VS29_ORYSJ	Os03g0109900 protein	Os03g0109900 OSNPB_030109900	Oryza sativa subsp. japonica (Rice)				HWASLQNK	0.97451	-2.4684	0	0	0	0	0	0	0	0	0	0	0	0	0	0	0	0	0	0	0	0	0	0	0	0	0	0	9.5623
A0A0P0VS32	A0A0P0VS32_ORYSJ	Os03g0107000 protein	Os03g0107000 OSNPB_030107000	Oryza sativa subsp. japonica (Rice)	auxin-activated signaling pathway [GO:0009734]; jasmonic acid mediated signaling pathway [GO:0009867]; protein ubiquitination [GO:0016567]; SCF-dependent proteasomal ubiquitin-dependent protein catabolic process [GO:0031146]	cytoplasm [GO:0005737]; nucleus [GO:0005634]	cullin family protein binding [GO:0097602]	SESELAVIKPEALK	0.98782	-10.086	0	0	0	0	0	0	0	0	0	0	9.33575	0	0	0	0	0	0	0	0	0	0	0	0	0	0	0	0
A0A0P0VS41	A0A0P0VS41_ORYSJ	Os02g0834700 protein	Os02g0834700 OSNPB_020834700	Oryza sativa subsp. japonica (Rice)				PISTRWSPEIKK	0.96761	-1.6736	0	10.4038	0	0	0	0	15.5951	0	9.86507	0	0	0	0	0	0	0	0	0	0	0	16.5052	0	0	0	0	0	0
A0A0P0VS60	A0A0P0VS60_ORYSJ	Os03g0110400 protein	Os03g0110400 OSNPB_030110400	Oryza sativa subsp. japonica (Rice)				LVMLRTCNQLLRR	0.97351	-2.2498	0	0	0	0	0	0	0	0	0	0	0	0	0	0	0	0	0	0	0	0	0	0	0	0	0	0	0
A0A0P0VSC6	A0A0P0VSC6_ORYSJ	Os03g0121950 protein	Os03g0121950 OSNPB_030121950	Oryza sativa subsp. japonica (Rice)				RGWAPVYGR	0.98053	-16.375	0	0	0	0	0	0	0	0	0	0	0	0	0	0	0	11.1733	0	0	0	0	0	0	0	0	0	0	0
A0A0P0VSI8	A0A0P0VSI8_ORYSJ	Os03g0129300 protein	Os03g0129300 OSNPB_030129300	Oryza sativa subsp. japonica (Rice)			oxidoreductase activity, acting on the aldehyde or oxo group of donors, NAD or NADP as acceptor [GO:0016620]	VPTPNVSVVDLVINTVK	0.98167	-10.57	0	0	0	0	0	0	0	0	0	0	0	0	9.71757	0	0	0	0	0	0	0	0	0	0	0	0	0	0
A0A0P0VSJ1	A0A0P0VSJ1_ORYSJ	Transcription repressor (Ovate family protein)	Os03g0126450 OSNPB_030126450	Oryza sativa subsp. japonica (Rice)	negative regulation of DNA-templated transcription [GO:0045892]	nucleus [GO:0005634]		RHTATLAPSRR	0.96817	-2.5454	0	0	0	0	0	0	0	0	0	0	0	0	0	0	0	0	0	0	0	0	0	0	0	0	0	0	0
A0A0P0VSL4	A0A0P0VSL4_ORYSJ	Os03g0130200 protein	Os03g0130200 OSNPB_030130200	Oryza sativa subsp. japonica (Rice)				AAVAVHHALGR	0.97476	-32.286	0	8.71359	15.4192	0	0	0	0	9.40506	0	0	0	0	0	0	0	0	0	0	0	15.705	15.9805	16.0221	0	15.9968	0	0	0
A0A0P0VSM9	A0A0P0VSM9_ORYSJ	Os03g0130950 protein	Os03g0130950 OSNPB_030130950	Oryza sativa subsp. japonica (Rice)				AWRPAPPPWPGSPRR	0.98101	-0.36998	0	0	0	0	0	0	0	0	0	0	0	0	0	0	0	0	0	0	0	0	11.8365	0	0	0	0	0	0
A0A0P0VSP0	A0A0P0VSP0_ORYSJ	Os03g0121250 protein	Os03g0121250 OSNPB_030121250	Oryza sativa subsp. japonica (Rice)				LLRHRHVAVSPPPR	0.98795	-10.086	0	0	0	0	0	9.91979	0	0	0	0	0	0	0	0	0	0	0	0	0	0	0	0	0	0	0	0	0
A0A0P0VSQ2	A0A0P0VSQ2_ORYSJ	Os03g0134100 protein	Os03g0134100 OSNPB_030134100	Oryza sativa subsp. japonica (Rice)				QIHCRLFLRR	0.98474	-13.623	0	0	0	10.3691	0	0	0	0	0	0	10.7977	0	0	0	0	0	0	0	0	0	0	0	0	8.82753	0	0	0
A0A0P0VST6	A0A0P0VST6_ORYSJ	Os03g0143532 protein	Os03g0143532 OSNPB_030143532	Oryza sativa subsp. japonica (Rice)				ISNLLHK	0.96208	-2.0335	0	0	0	0	0	0	0	0	0	0	0	0	0	0	0	0	0	0	0	0	0	0	0	0	11.6161	0	0
A0A0P0VST9	A0A0P0VST9_ORYSJ	Os03g0140650 protein	Os03g0140650 OSNPB_030140650	Oryza sativa subsp. japonica (Rice)				LMGQLVHHMFDMAGIK	0.98257	-10.686	0	0	0	0	0	0	0	0	0	0	0	12.5052	0	0	0	0	0	0	0	0	0	0	0	0	0	0	0
A0A0P0VSV6	A0A0P0VSV6_ORYSJ	protein-serine/threonine phosphatase (EC 3.1.3.16)	Os03g0137200 OSNPB_030137200	Oryza sativa subsp. japonica (Rice)	protein dephosphorylation [GO:0006470]		myosin phosphatase activity [GO:0017018]	HNVWRVKGLIQISR	0.98221	-0.1146	0	0	0	0	12.9831	0	0	0	0	0	0	0	0	0	0	0	0	0	0	0	0	0	0	0	0	0	0
A0A0P0VSX0	A0A0P0VSX0_ORYSJ	Os03g0141250 protein	Os03g0141250 OSNPB_030141250	Oryza sativa subsp. japonica (Rice)				SGDTPVPSR	0.97549	-4.5014	0	0	0	0	0	0	0	0	0	0	0	0	10.7853	0	0	0	0	0	0	0	0	0	0	0	0	0	0
A0A0P0VSX1	A0A0P0VSX1_ORYSJ	Os03g0133825 protein	Os03g0133825 OSNPB_030133825	Oryza sativa subsp. japonica (Rice)				HDAHGPR	0.9768	-22.117	10.2152	0	0	0	0	0	0	0	0	0	0	0	0	0	0	0	0	0	0	0	0	0	0	0	0	0	0
A0A0P0VSX3	A0A0P0VSX3_ORYSJ	Os03g0137750 protein	Os03g0137750 OSNPB_030137750	Oryza sativa subsp. japonica (Rice)				DLSHRIISHPPRR	0.98408	-12.404	0	0	0	0	0	9.5421	0	0	0	0	0	0	0	0	0	0	0	0	0	0	0	0	0	0	0	0	0
A0A0P0VSX6	A0A0P0VSX6_ORYSJ	Os03g0140100 protein	Os03g0140100 OSNPB_030140100	Oryza sativa subsp. japonica (Rice)		membrane [GO:0016020]	heme binding [GO:0020037]; iron ion binding [GO:0005506]; monooxygenase activity [GO:0004497]; oxidoreductase activity, acting on paired donors, with incorporation or reduction of molecular oxygen [GO:0016705]	FVADTIAK	0.98375	-8.2364	0	0	0	0	0	0	0	0	0	0	0	0	0	10.1209	0	0	0	0	0	0	0	0	0	0	0	0	11.1537
A0A0P0VSX9	A0A0P0VSX9_ORYSJ	Os03g0143150 protein	Os03g0143150 OSNPB_030143150	Oryza sativa subsp. japonica (Rice)				RVGRVVGAVALGVEPR	0.98373	-10.686	11.2951	0	0	0	0	9.91979	0	0	11.3131	0	0	0	0	0	0	0	0	0	0	0	0	0	0	0	0	0	0
A0A0P0VSY5	A0A0P0VSY5_ORYSJ	Os03g0144100 protein	Os03g0144100 OSNPB_030144100	Oryza sativa subsp. japonica (Rice)				MLTWLSDR	0.9753	-3.735	0	0	0	0	0	0	0	0	0	0	0	0	0	0	0	0	0	0	0	0	0	0	0	0	0	0	10.1366
A0A0P0VSZ2	A0A0P0VSZ2_ORYSJ	Os03g0144000 protein	Os03g0144000 OSNPB_030144000	Oryza sativa subsp. japonica (Rice)				RAFLPIKYFLTNAVR	0.96785	-1.2689	0	9.81049	0	0	0	0	0	0	0	0	0	0	0	0	0	0	0	0	0	0	0	8.92113	0	0	0	0	0
A0A0P0VT18	A0A0P0VT18_ORYSJ	Os03g0151000 protein	Os03g0151000 OSNPB_030151000	Oryza sativa subsp. japonica (Rice)				ARLITAQKPNTTK	0.9698	-2.2491	15.2275	0	0	0	0	0	0	0	0	0	0	0	0	0	0	0	0	0	0	0	0	0	0	10.9589	0	0	0
A0A0P0VT33	A0A0P0VT33_ORYSJ	Os03g0150550 protein	Os03g0150550 OSNPB_030150550	Oryza sativa subsp. japonica (Rice)				LRHLHPPVVRQYGR	0.98768	-10.086	0	0	0	0	10.0962	0	0	0	0	0	0	0	0	0	0	0	0	0	0	0	0	0	0	0	0	0	0
A0A0P0VT36	A0A0P0VT36_ORYSJ	Os03g0152800 protein	Os03g0152800 OSNPB_030152800	Oryza sativa subsp. japonica (Rice)				SLLLSPSPRRR	0.97789	-6.3608	0	0	0	0	0	0	0	0	0	0	0	0	0	0	0	0	0	0	0	0	0	0	0	0	0	0	8.4543
A0A0P0VT39	A0A0P0VT39_ORYSJ	Os03g0154800 protein	Os03g0154800 OSNPB_030154800	Oryza sativa subsp. japonica (Rice)				RQRPWDQCPRSK	0.98318	-7.7702	0	0	0	0	10.0167	0	0	0	0	0	0	0	0	0	0	0	0	0	0	0	0	0	0	0	0	0	0
A0A0P0VT42	A0A0P0VT42_ORYSJ	Os03g0150666 protein	Os03g0150666 OSNPB_030150666	Oryza sativa subsp. japonica (Rice)				AVQLHQDLSQIR	0.98326	-7.7702	0	0	0	0	0	0	0	0	0	0	0	0	0	0	0	0	0	0	0	0	0	0	0	0	0	0	0
A0A0P0VT44	A0A0P0VT44_ORYSJ	Os03g0152500 protein	Os03g0152500 OSNPB_030152500	Oryza sativa subsp. japonica (Rice)				RVALLDWWAAVIR	0.9843	-10.985	0	0	0	0	0	0	0	0	0	0	0	0	0	0	0	0	0	0	0	0	12.9008	0	0	0	0	0	0
A0A0P0VT62	A0A0P0VT62_ORYSJ	Os03g0145150 protein	Os03g0145150 OSNPB_030145150	Oryza sativa subsp. japonica (Rice)				ERRIPCGQR	0.98455	-13.907	0	11.6575	0	0	0	0	0	0	0	0	11.0879	0	0	0	11.5712	0	0	0	0	0	0	0	0	0	0	0	0
A0A0P0VT99	A0A0P0VT99_ORYSJ	Os03g0161100 protein	Os03g0161100 OSNPB_030161100	Oryza sativa subsp. japonica (Rice)		plasma membrane [GO:0005886]	actin filament binding [GO:0051015]	KEVTSLER	0.97542	-38.044	0	0	0	0	0	0	0	0	10.2755	0	0	0	0	10.5576	0	0	0	0	0	0	0	0	0	0	0	0	0
A0A0P0VTC4	A0A0P0VTC4_ORYSJ	Os03g0162725 protein	Os03g0162725 OSNPB_030162725	Oryza sativa subsp. japonica (Rice)				AAPRHRHQRPR	0.97752	-20.181	0	0	0	0	0	9.87323	0	0	0	0	0	0	0	0	0	0	0	0	0	0	0	0	0	0	0	0	0
A0A0P0VTD0	A0A0P0VTD0_ORYSJ	Os03g0161450 protein	Os03g0161450 OSNPB_030161450	Oryza sativa subsp. japonica (Rice)				RRCPPPR	0.97821	-19.494	0	0	0	0	0	0	0	0	0	0	0	0	0	0	0	0	0	0	0	0	0	0	0	0	0	11.2604	0
A0A0P0VTD4	A0A0P0VTD4_ORYSJ	Os03g0162850 protein	Os03g0162850 OSNPB_030162850	Oryza sativa subsp. japonica (Rice)				GSNGDGR	0.92019	-0.00052908	0	0	0	0	0	0	0	0	0	0	0	0	0	0	0	0	0	0	0	0	0	0	0	0	0	0	0
A0A0P0VTI5	A0A0P0VTI5_ORYSJ	Os03g0164300 protein	Os03g0164300 OSNPB_030164300	Oryza sativa subsp. japonica (Rice)				TFSGFDK	0.96928	-2.0335	0	0	0	0	0	0	0	0	0	0	0	0	0	0	0	0	0	0	0	0	0	0	0	0	0	0	0
A0A0P0VTJ9	A0A0P0VTJ9_ORYSJ	Os03g0159150 protein	Os03g0159150 OSNPB_030159150	Oryza sativa subsp. japonica (Rice)				GGGGGGGGVLGVRR	0.98519	-11.787	0	0	0	0	0	0	0	0	0	0	0	0	0	0	0	0	0	0	0	0	0	0	0	0	0	0	0
A0A0P0VTK6	A0A0P0VTK6_ORYSJ	Os03g0170400 protein	Os03g0170400 OSNPB_030170400	Oryza sativa subsp. japonica (Rice)	protein phosphorylation [GO:0006468]		ATP binding [GO:0005524]; protein serine/threonine kinase activity [GO:0004674]	AFSFNDLR	0.97578	-24.55	0	0	0	0	0	0	0	0	0	0	0	0	0	0	0	0	0	0	0	0	0	0	0	0	0	0	0
A0A0P0VTL7	A0A0P0VTL7_ORYSJ	DNA topoisomerase (EC 5.6.2.1)	Os03g0165000 OSNPB_030165000	Oryza sativa subsp. japonica (Rice)	DNA repair [GO:0006281]; DNA topological change [GO:0006265]; mitotic cell cycle [GO:0000278]; resolution of meiotic recombination intermediates [GO:0000712]	chromosome [GO:0005694]	DNA binding [GO:0003677]; DNA topoisomerase type I (single strand cut, ATP-independent) activity [GO:0003917]	ACFLDARANKVK	0.98669	-9.4717	0	0	0	0	0	0	10.702	0	0	0	0	0	0	0	0	0	0	0	0	0	0	0	0	0	0	0	0
A0A0P0VTQ7	A0A0P0VTQ7_ORYSJ	Os03g0173301 protein	Os03g0173301 OSNPB_030173301	Oryza sativa subsp. japonica (Rice)				FPASAEDPDGR	0.98233	-10.095	0	0	0	0	0	0	0	0	0	0	0	0	0	0	0	0	0	0	0	0	0	0	0	0	0	0	0
A0A0P0VTR1	A0A0P0VTR1_ORYSJ	tRNA-5-taurinomethyluridine 2-sulfurtransferase (EC 2.8.1.14)	Os03g0174600 OSNPB_030174600	Oryza sativa subsp. japonica (Rice)	tRNA processing [GO:0008033]		ATP binding [GO:0005524]; tRNA binding [GO:0000049]; tRNA-5-taurinomethyluridine 2-sulfurtransferase [GO:0061708]	GFWFYTIGQR	0.98467	-8.8442	0	0	0	0	0	0	0	0	0	0	0	0	0	0	0	0	0	0	0	0	9.51576	0	0	0	0	0	0
A0A0P0VTT5	A0A0P0VTT5_ORYSJ	Os03g0181750 protein	Os03g0181750 OSNPB_030181750	Oryza sativa subsp. japonica (Rice)	transmembrane transport [GO:0055085]	membrane [GO:0016020]	ABC-type transporter activity [GO:0140359]; ATP binding [GO:0005524]; ATP hydrolysis activity [GO:0016887]; ATPase-coupled transmembrane transporter activity [GO:0042626]	ATAITVAHR	0.97498	-32.6	0	0	0	0	0	0	0	0	0	0	0	0	0	0	0	0	0	0	0	0	0	0	17.2794	0	0	0	0
A0A0P0VTT6	A0A0P0VTT6_ORYSJ	Os03g0167500 protein	Os03g0167500 OSNPB_030167500	Oryza sativa subsp. japonica (Rice)				RDRPRIPEAR	0.97403	-3.2085	0	0	0	0	0	0	0	15.3386	0	16.2116	16.4761	0	0	0	0	0	0	15.9941	0	17.4234	17.4496	17.6003	17.6214	0	16.9074	16.7779	0
A0A0P0VTT7	A0A0P0VTT7_ORYSJ	Os03g0178150 protein	Os03g0178150 OSNPB_030178150	Oryza sativa subsp. japonica (Rice)				LRVRSSAFLAAISLHFR	0.98432	-12.819	0	0	0	0	0	0	0	0	0	0	0	0	0	0	0	0	0	0	0	0	0	0	0	0	12.6852	0	0
A0A0P0VTT8	A0A0P0VTT8_ORYSJ	Os03g0177900 protein	Os03g0177900 OSNPB_030177900	Oryza sativa subsp. japonica (Rice)	translation [GO:0006412]		GTP binding [GO:0005525]	FAELVTK	0.98421	-8.2787	0	10.2429	0	0	0	0	0	0	0	0	9.96622	0	0	0	0	0	0	10.5659	0	0	0	0	0	0	0	0	0
A0A0P0VTV0	A0A0P0VTV0_ORYSJ	Os03g0183950 protein	Os03g0183950 OSNPB_030183950	Oryza sativa subsp. japonica (Rice)				NSRAAAVAVAAEQR	0.97186	-0.0022359	0	0	0	0	0	0	0	0	0	0	0	0	0	0	0	0	0	0	0	0	0	0	0	0	0	0	0
A0A0P0VTW1	A0A0P0VTW1_ORYSJ	Os03g0179900 protein	Os03g0179900 OSNPB_030179900	Oryza sativa subsp. japonica (Rice)	lipid oxidation [GO:0034440]		metal ion binding [GO:0046872]; oxidoreductase activity, acting on single donors with incorporation of molecular oxygen, incorporation of two atoms of oxygen [GO:0016702]	RGVAVEDATQPHGVR	0.98413	-12.402	0	0	0	0	0	0	0	0	0	0	0	0	0	0	0	0	0	0	0	0	0	11.5939	0	0	0	0	0
A0A0P0VTX0	A0A0P0VTX0_ORYSJ	Os03g0179200 protein	Os03g0179200 OSNPB_030179200	Oryza sativa subsp. japonica (Rice)				LQGCPLESMARPAS	0.98592	-10.086	0	0	0	0	0	0	0	0	0	0	0	0	0	0	0	0	0	0	0	0	0	0	0	0	0	0	0
A0A0P0VTX5	A0A0P0VTX5_ORYSJ	Os03g0186500 protein	Os03g0186500 OSNPB_030186500	Oryza sativa subsp. japonica (Rice)		membrane [GO:0016020]		ETHKYPADIHNSPKR	0.98128	-10.465	0	0	0	0	0	0	0	0	0	0	0	0	0	0	0	0	0	0	0	0	0	0	0	0	0	0	0
A0A0P0VTX6	A0A0P0VTX6_ORYSJ	Os03g0185950 protein	Os03g0185950 OSNPB_030185950	Oryza sativa subsp. japonica (Rice)				VWARPWRPSSR	0.97394	-3.1204	0	0	0	0	0	0	0	0	0	0	0	0	0	0	0	0	11.8857	0	12.0705	0	0	0	0	0	0	0	0
A0A0P0VTY6	A0A0P0VTY6_ORYSJ	Flavin-containing monooxygenase (EC 1.-.-.-)	Os03g0182000 OSNPB_030182000	Oryza sativa subsp. japonica (Rice)			flavin adenine dinucleotide binding [GO:0050660]; N,N-dimethylaniline monooxygenase activity [GO:0004499]; NADP binding [GO:0050661]	RALRPLQQPGLQGR	0.98052	-0.1146	0	0	0	0	0	0	0	0	0	0	0	0	0	0	0	0	0	0	0	0	0	0	0	0	0	0	0
A0A0P0VU73	A0A0P0VU73_ORYSJ	Os03g0195100 protein	Os03g0195100 OSNPB_030195100	Oryza sativa subsp. japonica (Rice)			transaminase activity [GO:0008483]	REEHLKK	0.88506	-0.00052908	14.6978	0	0	0	14.2587	0	0	0	0	0	0	0	0	0	0	0	0	12.1804	0	0	0	0	0	0	0	0	0
A0A0P0VU80	A0A0P0VU80_ORYSJ	Os03g0194350 protein	Os03g0194350 OSNPB_030194350	Oryza sativa subsp. japonica (Rice)				DTSGDAWSLTSGERR	0.98388	-10.701	0	0	0	0	0	0	0	0	0	0	0	0	0	10.0623	0	10.6613	0	0	0	0	11.5133	0	0	0	0	0	0
A0A0P0VU92	A0A0P0VU92_ORYSJ	Os03g0198900 protein	Os03g0198900 OSNPB_030198900	Oryza sativa subsp. japonica (Rice)	macromolecule methylation [GO:0043414]; nucleic acid metabolic process [GO:0090304]	nucleus [GO:0005634]	methyltransferase activity [GO:0008168]; nucleic acid binding [GO:0003676]	AKDLLEFLPRMIK	0.98602	-9.2834	0	0	0	0	0	0	0	0	0	0	0	0	0	0	0	0	0	0	0	16.2483	0	0	0	0	0	0	0
A0A0P0VUA0	A0A0P0VUA0_ORYSJ	Os03g0197175 protein	Os03g0197175 OSNPB_030197175	Oryza sativa subsp. japonica (Rice)				LALRAVLDHVQRR	0.98603	-9.2834	0	0	0	0	0	0	9.18926	0	0	0	0	0	0	0	0	0	0	0	0	0	12.1768	0	0	0	0	0	0
A0A0P0VUB5	A0A0P0VUB5_ORYSJ	Os03g0197850 protein	Os03g0197850 OSNPB_030197850	Oryza sativa subsp. japonica (Rice)				HAATAAADTIIRSGNRR	0.97735	-7.0734	0	0	0	0	0	0	0	0	0	0	0	0	0	0	0	0	0	0	0	10.7317	0	0	0	0	0	0	0
A0A0P0VUB8	A0A0P0VUB8_ORYSJ	Os03g0202901 protein	Os03g0202901 OSNPB_030202901	Oryza sativa subsp. japonica (Rice)				FCCGSGSSRVRVR	0.98436	-10.985	0	0	0	0	0	0	0	0	0	0	0	0	0	0	0	0	0	0	0	0	0	0	0	0	0	0	0
A0A0P0VUC5	A0A0P0VUC5_ORYSJ	Os03g0201200 protein	Os03g0201200 OSNPB_030201200	Oryza sativa subsp. japonica (Rice)				EEERVRELK	0.97059	-2.4684	0	0	0	0	0	0	0	0	0	0	0	0	0	0	0	0	0	0	0	0	0	0	0	0	0	0	0
A0A0P0VUH1	A0A0P0VUH1_ORYSJ	Os03g0206150 protein	Os03g0206150 OSNPB_030206150	Oryza sativa subsp. japonica (Rice)				RPGPKGR	0.84892	-0.00052908	0	15.7862	0	0	0	15.5691	0	0	0	0	0	0	0	0	0	0	0	0	0	0	0	0	0	0	8.83646	0	0
A0A0P0VUH8	A0A0P0VUH8_ORYSJ	Os03g0205400 protein	Os03g0205400 OSNPB_030205400	Oryza sativa subsp. japonica (Rice)	nucleotide-excision repair [GO:0006289]	nucleus [GO:0005634]	5'-flap endonuclease activity [GO:0017108]; metal ion binding [GO:0046872]; single-stranded DNA binding [GO:0003697]	ARKLEELAAQIK	0.97996	-17.356	0	0	0	0	0	0	0	0	0	0	0	0	0	9.3474	0	0	0	0	0	0	0	0	0	0	0	0	0
A0A0P0VUI3	A0A0P0VUI3_ORYSJ	Os03g0204800 protein	Os03g0204800 OSNPB_030204800	Oryza sativa subsp. japonica (Rice)				ITKLFLHGIYVK	0.96999	-1.6736	0	0	0	0	0	0	9.24151	0	0	0	0	0	0	8.26655	0	0	0	0	9.91367	0	0	10.6014	0	0	0	0	9.5598
A0A0P0VUI6	A0A0P0VUI6_ORYSJ	Os03g0206750 protein	Os03g0206750 OSNPB_030206750	Oryza sativa subsp. japonica (Rice)				RAEVVVGGVVQPWR	0.98759	-10.086	0	0	0	0	0	0	0	0	0	0	0	0	0	0	0	0	0	0	0	0	0	0	0	0	0	0	0
A0A0P0VUJ1	A0A0P0VUJ1_ORYSJ	Os03g0207900 protein	Os03g0207900 OSNPB_030207900	Oryza sativa subsp. japonica (Rice)		Set1C/COMPASS complex [GO:0048188]		SLTLWHVVNEKKIAR	0.97906	-0.36998	0	0	0	0	0	0	0	10.6767	0	0	0	0	0	0	0	0	0	11.2012	11.9865	11.7071	0	0	12.7929	12.8599	10.3416	11.8883	0
A0A0P0VUJ8	A0A0P0VUJ8_ORYSJ	Os03g0199701 protein	Os03g0199701 OSNPB_030199701	Oryza sativa subsp. japonica (Rice)				STLHGACTHARTHPR	0.98401	-10.701	0	0	0	0	0	0	0	0	0	0	10.6435	0	0	0	0	0	0	0	0	0	0	0	0	0	0	0	0
A0A0P0VUL4	A0A0P0VUL4_ORYSJ	Os03g0210700 protein	Os03g0210700 OSNPB_030210700	Oryza sativa subsp. japonica (Rice)				TAGHVGR	0.97506	-3.6711	0	9.75766	0	0	0	0	0	0	0	0	0	0	0	0	0	0	0	0	0	0	0	0	0	0	0	0	0
A0A0P0VUQ5	A0A0P0VUQ5_ORYSJ	Os03g0216766 protein	Os03g0216766 OSNPB_030216766	Oryza sativa subsp. japonica (Rice)				GARMGNR	0.86525	-0.00052908	0	0	0	0	0	0	0	0	0	0	0	0	0	0	0	0	0	0	0	0	0	0	0	0	10.1072	0	0
A0A0P0VUQ8	A0A0P0VUQ8_ORYSJ	Os03g0219800 protein	Os03g0219800 OSNPB_030219800	Oryza sativa subsp. japonica (Rice)				NQECSRQKK	0.97399	-2.4684	0	0	0	0	0	0	0	0	0	0	0	0	0	0	0	0	0	13.129	0	0	0	0	0	0	0	0	0
A0A0P0VUS0	A0A0P0VUS0_ORYSJ	Os03g0211500 protein	Os03g0211500 OSNPB_030211500	Oryza sativa subsp. japonica (Rice)				GSGSSSKLQDK	0.97895	-17.534	0	0	0	0	0	0	12.928	0	0	0	0	0	0	0	0	0	0	0	0	0	0	0	0	0	0	0	0
A0A0P0VUT6	A0A0P0VUT6_ORYSJ	Os03g0219350 protein	Os03g0219350 OSNPB_030219350	Oryza sativa subsp. japonica (Rice)				RRLVVYPALEPCR	0.98683	-9.2834	0	0	0	0	0	0	0	0	0	0	0	0	0	0	10.1228	0	0	0	0	0	0	0	0	0	0	0	0
A0A0P0VUW7	A0A0P0VUW7_ORYSJ	Os03g0225200 protein	Os03g0225200 OSNPB_030225200	Oryza sativa subsp. japonica (Rice)	cell division [GO:0051301]; mitotic cell cycle phase transition [GO:0044772]		cyclin-dependent protein serine/threonine kinase regulator activity [GO:0016538]	MPPTMLASVPTRPR	0.9858	-10.086	0	0	0	0	0	0	0	0	0	0	0	0	0	0	0	0	0	0	0	0	0	0	0	0	0	0	0
A0A0P0VUY2	A0A0P0VUY2_ORYSJ	Os03g0226901 protein	Os03g0226901 OSNPB_030226901	Oryza sativa subsp. japonica (Rice)	protein phosphorylation [GO:0006468]	membrane [GO:0016020]	ATP binding [GO:0005524]; protein serine/threonine kinase activity [GO:0004674]	GEIRLDVR	0.98524	-1.7021	0	0	0	0	0	0	0	0	0	0	0	0	0	0	0	0	0	0	0	0	0	0	0	0	0	0	0
A0A0P0VV04	A0A0P0VV04_ORYSJ	Os03g0229600 protein	Os03g0229600 OSNPB_030229600	Oryza sativa subsp. japonica (Rice)			nucleoside triphosphate diphosphatase activity [GO:0047429]	KEKPEELVVALAHAK	0.98358	-10.701	0	0	0	0	0	0	0	0	0	0	0	0	0	0	0	0	0	0	0	0	0	0	0	0	0	0	0
A0A0P0VV44	A0A0P0VV44_ORYSJ	Os03g0231400 protein	Os03g0231400 OSNPB_030231400	Oryza sativa subsp. japonica (Rice)				VARFSSPLPSPRR	0.98442	-10.985	0	0	0	0	0	0	0	0	0	0	0	0	0	0	0	0	0	0	0	0	0	0	0	0	0	0	0
A0A0P0VV59	A0A0P0VV59_ORYSJ	Os03g0233700 protein	Os03g0233700 OSNPB_030233700	Oryza sativa subsp. japonica (Rice)				CPTWPVR	0.98409	-8.3943	0	0	14.435	0	0	0	0	0	0	0	0	0	0	0	0	0	0	0	0	0	0	0	0	0	0	0	0
A0A0P0VV61	A0A0P0VV61_ORYSJ	Os03g0233200 protein	Os03g0233200 OSNPB_030233200	Oryza sativa subsp. japonica (Rice)	defense response [GO:0006952]			AEVGHATSGAAR	0.97529	-4.8136	0	0	0	0	0	0	0	0	0	0	0	0	0	0	0	9.43715	0	0	0	0	0	0	0	0	0	0	0
A0A0P0VV62	A0A0P0VV62_ORYSJ	Squalene monooxygenase (EC 1.14.14.17)	Os03g0231800 OSNPB_030231800	Oryza sativa subsp. japonica (Rice)	sterol biosynthetic process [GO:0016126]	membrane [GO:0016020]	flavin adenine dinucleotide binding [GO:0050660]; squalene monooxygenase activity [GO:0004506]	CLVDVPGQK	0.97561	-4.5014	0	0	0	0	0	0	0	0	0	0	0	0	0	0	0	0	0	0	0	0	0	0	0	0	0	0	0
A0A0P0VV64	A0A0P0VV64_ORYSJ	Os03g0233251 protein	Os03g0233251 OSNPB_030233251	Oryza sativa subsp. japonica (Rice)				RLEQPRVPR	0.97178	-2.4684	0	0	0	0	10.7703	0	0	0	0	0	0	0	0	0	0	0	0	0	0	0	0	0	0	0	0	0	0
A0A0P0VV67	A0A0P0VV67_ORYSJ	Os03g0237267 protein	Os03g0237267 OSNPB_030237267	Oryza sativa subsp. japonica (Rice)				LQQRPRRQR	0.96583	-1.3911	0	0	0	0	0	0	0	0	0	0	0	0	0	10.9273	0	0	0	0	0	0	0	0	0	0	0	0	0
A0A0P0VV83	A0A0P0VV83_ORYSJ	Os03g0233750 protein	Os03g0233750 OSNPB_030233750	Oryza sativa subsp. japonica (Rice)				DAPGSSG	0.92373	-0.00052908	0	0	0	9.1205	0	9.42913	0	0	0	0	9.28325	9.62057	9.51627	9.13535	0	0	0	7.68706	0	0	0	0	0	0	0	7.78182	0
A0A0P0VV85	A0A0P0VV85_ORYSJ	Os03g0236300 protein	Os03g0236300 OSNPB_030236300	Oryza sativa subsp. japonica (Rice)	regulation of DNA-templated transcription [GO:0006355]	nucleus [GO:0005634]	DNA-binding transcription factor activity, RNA polymerase II-specific [GO:0000981]; RNA polymerase II cis-regulatory region sequence-specific DNA binding [GO:0000978]	DWGVIATAFPGRTDK	0.97455	-31.357	0	0	0	0	0	0	0	0	0	0	0	0	0	11.5181	0	0	10.5824	0	0	0	0	0	0	0	0	0	0
A0A0P0VV98	A0A0P0VV98_ORYSJ	Os03g0238750 protein	Os03g0238750 OSNPB_030238750	Oryza sativa subsp. japonica (Rice)				ADSTASRSRSR	0.97791	-18.085	0	0	0	0	0	0	0	0	0	0	0	0	0	0	0	0	0	0	0	0	0	0	0	0	0	0	0
A0A0P0VVC5	A0A0P0VVC5_ORYSJ	Os03g0244600 protein	Os03g0244600 OSNPB_030244600	Oryza sativa subsp. japonica (Rice)	amino acid transport [GO:0006865]	plasma membrane [GO:0005886]		LIGLHDCR	0.97201	-5.4087	9.6767	0	0	0	0	9.53224	0	10.623	0	0	0	0	0	0	0	0	0	0	0	0	10.0272	0	0	0	0	0	0
A0A0P0VVI2	A0A0P0VVI2_ORYSJ	Os03g0241001 protein	Os03g0241001 OSNPB_030241001	Oryza sativa subsp. japonica (Rice)		nucleus [GO:0005634]	DNA binding [GO:0003677]; DNA-binding transcription factor activity [GO:0003700]	RRQQQQQQAVQR	0.98302	-7.7702	0	0	0	0	0	0	0	0	0	0	0	0	0	0	0	0	0	0	0	0	14.1773	0	0	0	0	0	0
A0A0P0VVM1	A0A0P0VVM1_ORYSJ	Os03g0245600 protein	Os03g0245600 OSNPB_030245600	Oryza sativa subsp. japonica (Rice)				INNLVGLITGPANFTR	0.98181	-10.686	12.4125	0	0	0	0	0	0	0	0	0	0	0	0	0	0	0	0	0	0	0	0	0	0	0	0	0	0
A0A0P0VVN7	A0A0P0VVN7_ORYSJ	Os03g0264800 protein	Os03g0264800 OSNPB_030264800	Oryza sativa subsp. japonica (Rice)	sister chromatid cohesion [GO:0007062]		ATP binding [GO:0005524]; ATP hydrolysis activity [GO:0016887]	GVKVDLFLSR	0.9795	-6.8113	0	0	0	0	10.8971	0	0	0	0	0	0	0	0	0	0	0	0	0	0	0	0	0	0	0	0	0	0
A0A0P0VVP1	A0A0P0VVP1_ORYSJ	Os03g0262150 protein	Os03g0262150 OSNPB_030262150	Oryza sativa subsp. japonica (Rice)				MFKLTQK	0.91057	-0.00052908	0	0	0	0	0	0	0	0	0	0	0	0	0	0	0	0	0	0	0	0	0	0	0	0	0	0	0
A0A0P0VVP5	A0A0P0VVP5_ORYSJ	Os03g0254200 protein	Os03g0254200 OSNPB_030254200	Oryza sativa subsp. japonica (Rice)	amino acid transmembrane transport [GO:0003333]	plasma membrane [GO:0005886]		LQHRPARFHRAPYR	0.98733	-10.086	0	0	0	0	0	0	0	0	0	0	0	0	0	0	0	0	0	0	0	0	0	0	0	0	0	0	0
A0A0P0VVQ8	A0A0P0VVQ8_ORYSJ	Os03g0264075 protein	Os03g0264075 OSNPB_030264075	Oryza sativa subsp. japonica (Rice)				AEAAAGTAHGGGR	0.97378	-4.5019	0	0	0	0	9.85596	0	0	10.6321	0	0	0	0	0	0	0	0	10.4199	0	0	0	0	0	9.73044	0	10.607	0	0
A0A0P0VVR2	A0A0P0VVR2_ORYSJ	Os03g0261800 protein	Os03g0261800 OSNPB_030261800	Oryza sativa subsp. japonica (Rice)				AVPVPSATLFRAQR	0.97124	-0.0014897	0	0	0	0	0	0	0	0	0	0	0	0	0	0	0	0	0	0	0	0	0	0	0	0	0	0	0
A0A0P0VVR3	A0A0P0VVR3_ORYSJ	Os03g0263350 protein	Os03g0263350 OSNPB_030263350	Oryza sativa subsp. japonica (Rice)				SMLDAAA	0.89683	-0.00052908	0	0	0	0	8.9431	0	0	0	0	0	0	0	0	0	0	0	0	0	0	0	0	0	0	0	0	0	0
A0A0P0VVX9	A0A0P0VVX9_ORYSJ	Os03g0271200 protein	Os03g0271200 OSNPB_030271200	Oryza sativa subsp. japonica (Rice)		plastid outer membrane [GO:0009527]		FVNLNKQEK	0.96814	-1.3911	0	0	0	0	0	0	0	0	0	0	0	0	0	0	0	0	0	0	0	0	0	0	0	0	0	0	0
A0A0P0VW08	A0A0P0VW08_ORYSJ	Os03g0270700 protein	Os03g0270700 OSNPB_030270700	Oryza sativa subsp. japonica (Rice)				FLFSAMDLK	0.97583	-4.5014	0	0	0	11.1565	0	0	0	0	0	0	0	0	0	0	0	0	0	0	0	0	0	0	0	0	0	0	0
A0A0P0VW14	A0A0P0VW14_ORYSJ	Os03g0268250 protein	Os03g0268250 OSNPB_030268250	Oryza sativa subsp. japonica (Rice)				GAVPHPLWSRCLER	0.98567	-10.086	0	0	0	0	0	0	0	0	0	0	0	0	0	0	0	0	0	0	0	0	0	0	0	0	0	0	0
A0A0P0VW23	A0A0P0VW23_ORYSJ	Os03g0277400 protein	Os03g0277400 OSNPB_030277400	Oryza sativa subsp. japonica (Rice)				LARLLRHSPR	0.97783	-6.8113	0	0	0	9.18473	0	0	0	0	0	0	0	0	0	0	0	0	0	0	0	0	0	0	0	0	0	0	0
A0A0P0VW57	A0A0P0VW57_ORYSJ	Os03g0278650 protein	Os03g0278650 OSNPB_030278650	Oryza sativa subsp. japonica (Rice)				GRDPSEKEK	0.97435	-2.4684	0	0	0	0	0	0	0	0	0	0	0	0	0	0	0	0	0	11.394	0	0	0	0	0	0	0	0	0
A0A0P0VW87	A0A0P0VW87_ORYSJ	Os03g0284150 protein	Os03g0284150 OSNPB_030284150	Oryza sativa subsp. japonica (Rice)		membrane [GO:0016020]		FLSSFLR	0.977	-3.7356	0	0	0	0	0	0	0	0	0	0	0	0	0	0	0	0	0	0	0	0	0	0	0	0	0	0	0
A0A0P0VWA3	A0A0P0VWA3_ORYSJ	Os03g0290100 protein	Os03g0290100 OSNPB_030290100	Oryza sativa subsp. japonica (Rice)	response to auxin [GO:0009733]			MGCFVRFASQQVR	0.97083	-2.2492	0	0	0	0	0	0	0	0	0	0	0	0	0	0	0	0	0	0	0	0	0	0	0	0	0	0	0
A0A0P0VWA9	A0A0P0VWA9_ORYSJ	Os03g0284000 protein	Os03g0284000 OSNPB_030284000	Oryza sativa subsp. japonica (Rice)	auxin polar transport [GO:0009926]; negative regulation of anthocyanin metabolic process [GO:0031538]; positive regulation of cell population proliferation [GO:0008284]; regulation of leaf development [GO:2000024]; response to oxidative stress [GO:0006979]; root morphogenesis [GO:0010015]; shoot system morphogenesis [GO:0010016]; tRNA wobble uridine modification [GO:0002098]	elongator holoenzyme complex [GO:0033588]		LHFFDLQAFPGGAK	0.96375	-0.1146	0	0	0	0	0	0	0	0	0	0	0	0	0	0	0	0	0	0	0	0	0	0	0	11.4173	0	0	0
A0A0P0VWB5	A0A0P0VWB5_ORYSJ	Os03g0290400 protein	Os03g0290400 OSNPB_030290400	Oryza sativa subsp. japonica (Rice)	regulation of exocytosis [GO:0017157]	cytoplasm [GO:0005737]; plasma membrane [GO:0005886]	GTPase activator activity [GO:0005096]; myosin II binding [GO:0045159]; syntaxin binding [GO:0019905]	LFDGSSDVEKPR	0.98519	-11.505	0	10.1635	0	0	0	0	0	0	0	0	0	0	0	0	0	0	0	0	0	0	0	0	0	0	0	0	0
A0A0P0VWD5	A0A0P0VWD5_ORYSJ	laccase (EC 1.10.3.2)	Os03g0297900 OSNPB_030297900	Oryza sativa subsp. japonica (Rice)	lignin catabolic process [GO:0046274]	apoplast [GO:0048046]	copper ion binding [GO:0005507]; hydroquinone:oxygen oxidoreductase activity [GO:0052716]; oxidoreductase activity [GO:0016491]	QLRPGEGRPQVQPR	0.9836	-13.82	0	0	0	0	0	0	0	0	0	0	0	0	0	0	0	0	0	0	0	0	0	13.2464	0	0	0	0	0
A0A0P0VWE6	A0A0P0VWE6_ORYSJ	Os03g0296200 protein	Os03g0296200 OSNPB_030296200	Oryza sativa subsp. japonica (Rice)				RPCPWRR	0.97145	-5.0614	0	0	0	0	0	0	0	0	0	0	0	0	0	0	0	0	0	0	0	0	0	0	0	0	0	0	0
A0A0P0VWP3	A0A0P0VWP3_ORYSJ	Os03g0314450 protein	Os03g0314450 OSNPB_030314450	Oryza sativa subsp. japonica (Rice)				EVRVQEGHREH	0.97674	-6.3608	0	0	0	0	0	0	0	0	0	0	0	0	0	0	0	0	0	9.74611	0	0	0	0	0	0	0	0	0
A0A0P0VWQ4	A0A0P0VWQ4_ORYSJ	Os03g0279832 protein	Os03g0279832 OSNPB_030279832	Oryza sativa subsp. japonica (Rice)				LTTNQIWLVCESK	0.98542	-13.018	0	0	0	0	0	0	0	0	0	0	0	0	0	0	0	0	0	0	0	0	0	11.5939	0	0	0	0	0
A0A0P0VWQ5	A0A0P0VWQ5_ORYSJ	Os03g0318275 protein	Os03g0318275 OSNPB_030318275	Oryza sativa subsp. japonica (Rice)				TPLRGYSPQIR	0.97782	-19.047	0	0	0	9.37471	9.2213	0	0	0	0	0	0	0	0	0	0	0	0	0	0	0	0	11.8146	0	11.4933	0	0	0
A0A0P0VWQ7	A0A0P0VWQ7_ORYSJ	Os03g0312500 protein	Os03g0312500 OSNPB_030312500	Oryza sativa subsp. japonica (Rice)			metal ion binding [GO:0046872]; ubiquitin-protein transferase activity [GO:0004842]	MHAGLEEAQR	0.98469	-11.39	0	0	0	0	0	0	0	0	0	0	0	0	0	0	0	0	0	0	0	0	0	0	0	0	9.90485	0	0
A0A0P0VWS3	A0A0P0VWS3_ORYSJ	Os03g0315800 protein	Os03g0315800 OSNPB_030315800	Oryza sativa subsp. japonica (Rice)			nucleic acid binding [GO:0003676]	KLEPTPGDMIRNPK	0.97552	-4.5411	0	0	0	0	0	0	0	0	0	0	0	0	0	0	11.9424	0	0	0	0	13.5394	0	0	0	0	13.2235	12.0974	0
A0A0P0VWU3	A0A0P0VWU3_ORYSJ	Os03g0284500 protein	Os03g0284500 OSNPB_030284500	Oryza sativa subsp. japonica (Rice)				NLLVPLFLTLYKIVNA	0.97634	-4.3254	0	0	0	0	0	0	0	0	0	0	0	0	0	0	0	0	0	0	0	0	0	0	0	0	0	0	0
A0A0P0VWU6	A0A0P0VWU6_ORYSJ	Os03g0282100 protein	Os03g0282100 OSNPB_030282100	Oryza sativa subsp. japonica (Rice)	transmembrane transport [GO:0055085]	membrane [GO:0016020]	ABC-type transporter activity [GO:0140359]; ATP binding [GO:0005524]; ATP hydrolysis activity [GO:0016887]; ATPase-coupled transmembrane transporter activity [GO:0042626]	IIGLIDRLMFLSR	0.86047	-0.00052908	0	0	0	0	0	11.5408	0	0	0	0	0	0	0	0	12.2792	0	0	0	0	0	0	0	0	0	0	0	0
A0A0P0VWV3	A0A0P0VWV3_ORYSJ	Os03g0286700 protein	Os03g0286700 OSNPB_030286700	Oryza sativa subsp. japonica (Rice)	transmembrane transport [GO:0055085]	membrane [GO:0016020]	transmembrane transporter activity [GO:0022857]	CLTTASSSTTVR	0.98485	-11.505	0	0	0	0	0	0	0	0	0	9.51895	0	0	0	0	0	0	0	0	0	0	0	0	0	0	0	0	0
A0A0P0VWW7	A0A0P0VWW7_ORYSJ	Os03g0288900 protein	Os03g0288900 OSNPB_030288900	Oryza sativa subsp. japonica (Rice)				AAPGPELDPKPRK	0.9763	-46.04	0	0	0	0	0	8.92727	0	0	0	0	0	0	0	0	0	0	0	14.3827	0	0	9.37545	0	10.1235	0	0	0	0
A0A0P0VWY3	A0A0P0VWY3_ORYSJ	Os03g0291800 protein	Os03g0291800 OSNPB_030291800	Oryza sativa subsp. japonica (Rice)	xylan acetylation [GO:1990937]	Golgi membrane [GO:0000139]	xylan O-acetyltransferase activity [GO:1990538]	RDDSYQK	0.98086	-7.7707	0	0	0	0	0	0	0	0	0	0	0	0	0	10.5381	0	0	0	0	0	0	0	0	0	0	0	0	0
A0A0P0VX11	A0A0P0VX11_ORYSJ	Os03g0294650 protein	Os03g0294650 OSNPB_030294650	Oryza sativa subsp. japonica (Rice)				CKSCSLPAVPIR	0.97492	-33.176	0	0	0	0	0	0	0	0	0	0	9.72962	0	0	0	9.75799	0	0	0	0	0	0	0	0	12.6932	0	0	0
A0A0P0VX15	A0A0P0VX15_ORYSJ	Os03g0294032 protein	Os03g0294032 OSNPB_030294032	Oryza sativa subsp. japonica (Rice)				HRCVAVTGMATR	0.98549	-7.7702	0	0	0	0	0	0	0	0	0	0	0	0	0	0	0	0	0	0	0	0	0	0	0	0	0	0	0
A0A0P0VX23	A0A0P0VX23_ORYSJ	Os03g0330400 protein	Os03g0330400 OSNPB_030330400	Oryza sativa subsp. japonica (Rice)				IYAAPPESTSRR	0.98226	-15.717	0	0	0	0	0	0	0	0	0	0	0	14.6243	0	0	0	0	0	0	0	0	0	0	0	0	0	0	0
A0A0P0VX44	A0A0P0VX44_ORYSJ	Os03g0332500 protein	Os03g0332500 OSNPB_030332500	Oryza sativa subsp. japonica (Rice)	translation [GO:0006412]	ribonucleoprotein complex [GO:1990904]; ribosome [GO:0005840]	structural constituent of ribosome [GO:0003735]	TKPRCIAR	0.98492	-1.7021	0	12.9535	0	0	0	0	14.293	14.3248	0	0	14.13	12.7141	14.0854	0	0	0	0	14.7861	0	0	0	0	15.0915	0	14.1893	14.1699	0
A0A0P0VX50	A0A0P0VX50_ORYSJ	Os03g0334601 protein	Os03g0334601 OSNPB_030334601	Oryza sativa subsp. japonica (Rice)				MTCSLRHR	0.98533	-13.85	0	0	0	0	0	0	0	0	0	9.26578	0	0	0	0	0	0	0	0	0	0	0	0	0	0	0	0	0
A0A0P0VX68	A0A0P0VX68_ORYSJ	Os03g0338200 protein	Os03g0338200 OSNPB_030338200	Oryza sativa subsp. japonica (Rice)				AVRTFFSGRGVQSR	0.98697	-9.4728	0	0	0	0	0	0	0	0	0	0	0	0	0	0	13.5564	0	15.8527	0	0	0	0	0	0	0	0	0	0
A0A0P0VX76	A0A0P0VX76_ORYSJ	Os03g0304550 protein	Os03g0304550 OSNPB_030304550	Oryza sativa subsp. japonica (Rice)				QAWPRTKFIPPLGVR	0.98048	-0.37051	0	0	0	0	0	0	0	0	0	0	0	0	0	9.09985	0	9.40735	0	0	0	0	0	0	0	0	0	0	0
A0A0P0VX81	A0A0P0VX81_ORYSJ	Os03g0300801 protein	Os03g0300801 OSNPB_030300801	Oryza sativa subsp. japonica (Rice)				GDGAPEVLLVQRNR	0.97721	-22.772	0	0	0	0	0	0	0	0	0	0	0	0	0	0	0	0	0	0	15.5062	0	0	0	0	0	0	0	0
A0A0P0VXA7	A0A0P0VXA7_ORYSJ	Os03g0344400 protein	Os03g0344400 OSNPB_030344400	Oryza sativa subsp. japonica (Rice)				SPPALPPSR	0.97601	-4.5014	0	0	0	13.865	0	0	0	0	0	0	0	0	0	0	0	0	0	0	0	0	0	14.6651	0	0	0	0	13.6661
A0A0P0VXF7	A0A0P0VXF7_ORYSJ	Os03g0308600 protein	Os03g0308600 OSNPB_030308600	Oryza sativa subsp. japonica (Rice)				ACSVVGVLVWR	0.9864	-9.3566	0	0	0	0	0	0	0	0	0	0	0	0	0	0	0	0	0	0	0	0	12.9646	0	0	0	0	0	0
A0A0P0VXK0	A0A0P0VXK0_ORYSJ	Os03g0316550 protein	Os03g0316550 OSNPB_030316550	Oryza sativa subsp. japonica (Rice)	proteolysis [GO:0006508]		serine-type endopeptidase activity [GO:0004252]	APWLMSPSAASRAA	0.98541	-11.787	0	0	0	0	0	0	0	0	0	0	0	0	0	0	0	11.0128	0	0	0	0	0	0	0	0	0	0	0
A0A0P0VXK4	A0A0P0VXK4_ORYSJ	Os03g0358500 protein	Os03g0358500 OSNPB_030358500	Oryza sativa subsp. japonica (Rice)		membrane [GO:0016020]		LLHRHEIGTK	0.97964	-6.8113	0	0	0	0	0	0	0	0	0	0	0	0	0	0	0	0	0	0	0	0	0	9.94484	0	0	0	0	0
A0A0P0VXK5	A0A0P0VXK5_ORYSJ	Os03g0355700 protein	Os03g0355700 OSNPB_030355700	Oryza sativa subsp. japonica (Rice)				GLESLMKIQARQR	0.98407	-14.345	0	0	0	0	0	0	0	0	10.1068	0	0	0	0	0	0	0	0	0	0	0	0	0	0	0	0	0	0
A0A0P0VXM6	A0A0P0VXM6_ORYSJ	Os03g0360750 protein	Os03g0360750 OSNPB_030360750	Oryza sativa subsp. japonica (Rice)				RHADGDGRR	0.97302	-2.4684	13.5294	0	0	0	0	0	0	0	0	0	0	0	0	0	0	13.8384	0	0	0	0	0	0	0	0	0	0	0
A0A0P0VXN0	A0A0P0VXN0_ORYSJ	Os03g0320800 protein	Os03g0320800 OSNPB_030320800	Oryza sativa subsp. japonica (Rice)				KLKYLDLR	0.98347	-1.7021	0	9.44288	9.8108	0	0	0	9.65901	0	0	0	0	9.45791	0	0	0	0	0	0	0	10.3583	10.3677	0	0	0	0	9.96013	0
A0A0P0VXQ6	A0A0P0VXQ6_ORYSJ	Os03g0360200 protein	Os03g0360200 OSNPB_030360200	Oryza sativa subsp. japonica (Rice)				MCMPMATRRWR	0.9841	-12.606	0	0	0	0	0	0	0	0	0	0	0	0	0	0	0	9.92878	0	0	0	0	0	0	0	0	0	0	0
A0A0P0VXR7	A0A0P0VXR7_ORYSJ	Os03g0367150 protein	Os03g0367150 OSNPB_030367150	Oryza sativa subsp. japonica (Rice)				EHVLRTY	0.87662	-0.00052908	0	0	0	0	0	0	0	0	0	0	0	0	0	14.3708	0	0	0	0	0	0	0	14.7135	0	0	0	0	0
A0A0P0VXU9	A0A0P0VXU9_ORYSJ	Os03g0366525 protein	Os03g0366525 OSNPB_030366525	Oryza sativa subsp. japonica (Rice)				SGVYWKFGR	0.9741	-2.4684	0	0	0	0	0	0	0	0	0	0	0	0	0	0	9.58538	0	0	0	0	0	0	0	0	0	0	0	0
A0A0P0VXZ5	A0A0P0VXZ5_ORYSJ	Os03g0340001 protein	Os03g0340001 OSNPB_030340001	Oryza sativa subsp. japonica (Rice)	porphyrin-containing compound biosynthetic process [GO:0006779]		uroporphyrinogen decarboxylase activity [GO:0004853]	ATACPPLSLQPAYLPGR	0.98425	-14.305	0	0	0	0	0	0	0	0	0	0	0	0	0	0	0	0	0	0	0	0	0	0	0	0	10.2119	0	0
A0A0P0VXZ6	A0A0P0VXZ6_ORYSJ	Os03g0374901 protein	Os03g0374901 OSNPB_030374901	Oryza sativa subsp. japonica (Rice)				GGELGGDERHRDAPR	0.98401	-12.402	0	0	0	0	0	0	0	0	0	0	0	0	0	0	0	0	0	0	0	9.79528	0	0	0	0	0	0	0
A0A0P0VXZ8	A0A0P0VXZ8_ORYSJ	Os03g0377500 protein	Os03g0377500 OSNPB_030377500	Oryza sativa subsp. japonica (Rice)		mitochondrial outer membrane [GO:0005741]		LTCALSIQVLPLLSLFR	0.97996	-16.815	0	0	0	0	0	0	0	0	0	0	0	0	0	0	0	0	0	0	0	0	10.7062	0	0	0	0	0	0
A0A0P0VY04	A0A0P0VY04_ORYSJ	Os03g0376701 protein	Os03g0376701 OSNPB_030376701	Oryza sativa subsp. japonica (Rice)				RPASWALSTLKGRLPTK	0.98181	-10.57	0	0	0	0	0	0	0	0	0	0	0	0	0	0	0	0	0	0	0	0	0	9.52652	0	0	0	0	0
A0A0P0VY06	A0A0P0VY06_ORYSJ	Os03g0374600 protein	Os03g0374600 OSNPB_030374600	Oryza sativa subsp. japonica (Rice)	carbohydrate metabolic process [GO:0005975]		glucan endo-1,3-beta-D-glucosidase activity [GO:0042973]	FLNATGAPLFLK	0.98486	-11.505	0	0	0	0	0	0	0	0	0	0	0	0	0	0	0	0	9.19259	0	0	0	0	0	0	0	0	0	0
A0A0P0VY07	A0A0P0VY07_ORYSJ	Os03g0376350 protein	Os03g0376350 OSNPB_030376350	Oryza sativa subsp. japonica (Rice)				IQINWLVSRLK	0.97706	-6.3608	0	0	0	0	0	0	0	0	0	0	0	0	0	0	0	0	0	0	0	0	0	0	0	0	0	0	0
A0A0P0VY12	A0A0P0VY12_ORYSJ	Os03g0334050 protein	Os03g0334050 OSNPB_030334050	Oryza sativa subsp. japonica (Rice)				MAPIYEVQHK	0.98442	-8.8442	0	0	0	0	0	0	0	0	0	0	0	0	0	0	0	0	0	0	0	0	0	0	0	0	0	0	0
A0A0P0VY18	A0A0P0VY18_ORYSJ	Os03g0375933 protein	Os03g0375933 OSNPB_030375933	Oryza sativa subsp. japonica (Rice)				HGGPPDDAEAR	0.98492	-13.53	0	0	0	0	0	0	0	0	9.21062	0	0	0	0	0	0	0	0	0	0	0	0	0	0	0	0	0	0
A0A0P0VY29	A0A0P0VY29_ORYSJ	Os03g0336500 protein	Os03g0336500 OSNPB_030336500	Oryza sativa subsp. japonica (Rice)				RPPPSSGATR	0.98387	-8.8442	0	0	12.6409	0	0	0	0	0	0	0	0	0	0	0	0	0	0	0	0	0	0	0	0	0	0	0	0
A0A0P0VY34	A0A0P0VY34_ORYSJ	Os03g0339150 protein	Os03g0339150 OSNPB_030339150	Oryza sativa subsp. japonica (Rice)				TLLFLTPAR	0.97181	-4.5014	0	0	0	0	0	0	0	0	0	0	0	0	0	0	0	0	0	0	0	0	0	0	0	0	0	0	0
A0A0P0VY83	A0A0P0VY83_ORYSJ	Trehalose 6-phosphate phosphatase (EC 3.1.3.12)	Os03g0386500 OSNPB_030386500	Oryza sativa subsp. japonica (Rice)	trehalose biosynthetic process [GO:0005992]		trehalose-phosphatase activity [GO:0004805]	DPGEVKDFLRK	0.97583	-25.574	0	0	0	0	0	0	0	0	0	0	0	0	0	0	0	0	0	0	0	10.1038	10.2566	0	0	0	0	0	0
A0A0P0VY92	A0A0P0VY92_ORYSJ	Os03g0389000 protein	Os03g0389000 OSNPB_030389000	Oryza sativa subsp. japonica (Rice)	proteolysis [GO:0006508]		cysteine-type endopeptidase activity [GO:0004197]	AERQDPRR	0.98012	-17.256	0	0	0	0	11.7266	0	0	0	0	0	0	0	0	0	0	0	0	0	0	0	0	0	0	9.25446	0	0	0
A0A0P0VY94	A0A0P0VY94_ORYSJ	Os03g0347750 protein	Os03g0347750 OSNPB_030347750	Oryza sativa subsp. japonica (Rice)				HRPATHPAPRPR	0.97559	-4.8136	0	0	0	0	0	0	0	0	0	0	0	0	0	0	0	0	0	0	0	0	0	0	0	0	0	0	0
A0A0P0VYA6	A0A0P0VYA6_ORYSJ	Os03g0391601 protein	Os03g0391601 OSNPB_030391601	Oryza sativa subsp. japonica (Rice)				QWWLWQPR	0.97907	-6.3613	0	0	0	0	0	0	0	0	0	0	0	0	0	0	9.75739	0	13.4625	0	0	0	0	0	0	0	0	0	0
A0A0P0VYA8	A0A0P0VYA8_ORYSJ	Os03g0393300 protein	Os03g0393300 OSNPB_030393300	Oryza sativa subsp. japonica (Rice)	proteolysis [GO:0006508]		serine-type carboxypeptidase activity [GO:0004185]	EVRGSPLMR	0.98213	-15.94	0	0	0	0	0	0	0	0	0	0	0	0	0	0	0	0	0	0	0	13.6995	0	0	0	0	0	0	0
A0A0P0VYB0	A0A0P0VYB0_ORYSJ	Os03g0392000 protein	Os03g0392000 OSNPB_030392000	Oryza sativa subsp. japonica (Rice)	cell cycle [GO:0007049]; cell division [GO:0051301]			MEIIVLTTLKWR	0.97381	-3.4819	0	0	0	0	0	0	0	0	0	0	0	0	0	0	0	10.862	0	0	0	0	0	0	0	0	0	11.3711	0
A0A0P0VYF7	A0A0P0VYF7_ORYSJ	Os03g0358600 protein	Os03g0358600 OSNPB_030358600	Oryza sativa subsp. japonica (Rice)				GKPHTQR	0.97678	-22.294	0	0	0	0	0	0	0	0	0	0	0	0	0	0	0	0	0	0	0	11.7554	0	0	0	0	0	0	0
A0A0P0VYG1	A0A0P0VYG1_ORYSJ	Os03g0356700 protein	Os03g0356700 OSNPB_030356700	Oryza sativa subsp. japonica (Rice)	actin filament capping [GO:0051693]; actin filament organization [GO:0007015]		actin filament binding [GO:0051015]	EEFYQQPGWKQELQKR	0.98387	-13.836	0	0	0	0	0	0	0	0	0	0	9.12448	0	0	0	0	0	0	0	0	0	0	0	0	0	0	0	0
A0A0P0VYK8	A0A0P0VYK8_ORYSJ	Os03g0409500 protein	Os03g0409500 OSNPB_030409500	Oryza sativa subsp. japonica (Rice)				GLLLELEDHLK	0.98246	-10.095	0	0	0	0	0	0	0	0	0	0	0	0	0	0	0	0	0	0	0	10.5495	0	0	0	0	0	0	0
A0A0P0VYN4	A0A0P0VYN4_ORYSJ	Os03g0406350 protein	Os03g0406350 OSNPB_030406350	Oryza sativa subsp. japonica (Rice)				RPPTHGEN	0.97834	-7.4701	0	0	0	0	0	0	0	0	0	0	0	0	0	0	11.194	0	0	0	0	0	0	0	0	0	0	0	0
A0A0P0VYP9	A0A0P0VYP9_ORYSJ	Os03g0410700 protein	Os03g0410700 OSNPB_030410700	Oryza sativa subsp. japonica (Rice)				RPLFNAATAVVVR	0.98609	-9.2834	0	0	0	0	0	0	0	0	0	0	0	0	0	0	0	0	0	0	0	0	0	0	0	0	0	0	0
A0A0P0VYR1	A0A0P0VYR1_ORYSJ	Os03g0420900 protein	Os03g0420900 OSNPB_030420900	Oryza sativa subsp. japonica (Rice)				FGRYATPSVSPPRR	0.96934	-0.0014818	0	0	0	0	0	0	0	0	0	0	0	0	0	0	0	0	0	0	9.32242	0	0	0	0	0	0	0	0
A0A0P0VYU0	A0A0P0VYU0_ORYSJ	Os03g0375966 protein	Os03g0375966 OSNPB_030375966	Oryza sativa subsp. japonica (Rice)		membrane [GO:0016020]	polyamine transmembrane transporter activity [GO:0015203]	AFGPFAGSLMGTWK	0.97646	-0.1146	0	0	0	0	0	0	0	0	0	0	0	9.27582	0	0	0	0	0	0	0	0	0	0	0	0	0	0	0
A0A0P0VYU4	A0A0P0VYU4_ORYSJ	Os03g0421200 protein	Os03g0421200 OSNPB_030421200	Oryza sativa subsp. japonica (Rice)				RRPHPPSSTPR	0.98456	-8.0628	0	0	0	14.8527	9.2329	14.5585	14.2175	14.2349	0	0	0	0	13.8206	13.9238	13.81	0	0	0	0	15.2795	15.5887	15.6722	0	15.8542	0	0	0
A0A0P0VYU6	A0A0P0VYU6_ORYSJ	Os03g0379000 protein	Os03g0379000 OSNPB_030379000	Oryza sativa subsp. japonica (Rice)				GGCVDRTTLVRC	0.98069	-1.6751	0	0	0	0	0	0	0	0	0	0	0	0	0	0	0	0	0	0	0	0	9.24177	0	0	0	0	0	0
A0A0P0VYW2	A0A0P0VYW2_ORYSJ	Os03g0377900 protein	Os03g0377900 OSNPB_030377900	Oryza sativa subsp. japonica (Rice)				MQLQDYRRR	0.97454	-2.4684	0	0	0	0	0	0	0	0	0	0	0	0	0	0	0	0	0	0	0	0	0	0	0	0	0	0	0
A0A0P0VZ15	A0A0P0VZ15_ORYSJ	Os03g0432354 protein	Os03g0432354 OSNPB_030432354	Oryza sativa subsp. japonica (Rice)				NAPRNPPQNARLSSR	0.98432	-13.909	0	0	0	0	0	0	0	0	0	0	0	0	0	0	0	0	0	0	0	0	0	10.8762	0	0	0	11.6437	0
A0A0P0VZ23	A0A0P0VZ23_ORYSJ	Os03g0390900 protein	Os03g0390900 OSNPB_030390900	Oryza sativa subsp. japonica (Rice)	plant organ development [GO:0099402]	chloroplast membrane [GO:0031969]		RHAPSPLLSR	0.97782	-6.2452	0	0	0	0	0	0	0	0	0	0	0	0	0	0	0	0	0	0	0	0	0	0	0	0	0	0	11.6925
A0A0P0VZ25	A0A0P0VZ25_ORYSJ	Os03g0432100 protein	Os03g0432100 OSNPB_030432100	Oryza sativa subsp. japonica (Rice)				RPRPPQRR	0.98457	-10.985	0	0	0	0	0	0	0	0	12.6477	0	0	0	0	0	0	0	0	0	10.9173	0	0	0	0	0	0	0	8.28997
A0A0P0VZ28	A0A0P0VZ28_ORYSJ	Os03g0429800 protein	Os03g0429800 OSNPB_030429800	Oryza sativa subsp. japonica (Rice)			2 iron, 2 sulfur cluster binding [GO:0051537]; FAD binding [GO:0071949]; iron ion binding [GO:0005506]; oxidoreductase activity [GO:0016491]	DFFLGYRK	0.98683	-12.158	0	0	0	0	0	0	0	0	0	0	0	12.1283	0	0	0	0	0	0	0	0	11.0348	0	12.4687	0	0	0	0
A0A0P0VZ48	A0A0P0VZ48_ORYSJ	Os03g0397033 protein	Os03g0397033 OSNPB_030397033	Oryza sativa subsp. japonica (Rice)				CGGRVSPFAAALPCPRR	0.97621	-23.332	0	0	0	10.8179	0	0	0	0	0	0	0	0	9.6728	0	0	0	0	0	0	0	0	0	0	0	0	0	0
A0A0P0VZ50	A0A0P0VZ50_ORYSJ	Os03g0437801 protein	Os03g0437801 OSNPB_030437801	Oryza sativa subsp. japonica (Rice)				SALPQACQRGK	0.98065	-8.0623	0	0	0	14.1644	0	0	0	0	0	0	0	0	0	0	0	0	0	0	0	12.8665	0	0	0	0	0	0	0
A0A0P0VZ62	A0A0P0VZ62_ORYSJ	Os03g0399950 protein	Os03g0399950 OSNPB_030399950	Oryza sativa subsp. japonica (Rice)				HRHVVLLPAVVAAPR	0.98418	-12.402	0	0	0	0	0	0	0	0	0	0	0	0	0	0	0	0	0	0	0	0	0	0	0	0	0	0	0
A0A0P0VZ72	A0A0P0VZ72_ORYSJ	Os03g0448000 protein	Os03g0448000 OSNPB_030448000	Oryza sativa subsp. japonica (Rice)				SSLRLVIQCWRR	0.97379	-1.6736	0	0	0	0	0	0	0	0	0	0	0	0	12.0783	0	11.763	0	0	0	0	0	0	0	0	0	0	0	0
A0A0P0VZ75	A0A0P0VZ75_ORYSJ	Os03g0393400 protein	Os03g0393400 OSNPB_030393400	Oryza sativa subsp. japonica (Rice)				MEHVPPWTLSPAHR	0.97436	-0.0015058	0	0	0	0	0	0	0	0	0	0	0	0	0	0	0	0	0	0	0	0	0	0	0	0	0	0	0
A0A0P0VZ97	A0A0P0VZ97_ORYSJ	Os03g0557101 protein	Os03g0557101 OSNPB_030557101	Oryza sativa subsp. japonica (Rice)				VEKTMETSASKLR	0.98636	-9.2834	0	0	0	0	0	14.3624	0	0	0	0	0	0	0	0	0	0	0	0	0	0	0	0	0	0	0	0	0
A0A0P0VZA9	A0A0P0VZA9_ORYSJ	Os03g0563400 protein	Os03g0563400 OSNPB_030563400	Oryza sativa subsp. japonica (Rice)	post-embryonic development [GO:0009791]	nucleus [GO:0005634]	DNA binding [GO:0003677]; metal ion binding [GO:0046872]; protein dimerization activity [GO:0046983]	QPVENFVFYPRR	0.98183	-7.7702	12.1658	0	0	0	0	0	0	0	0	0	0	0	0	0	0	0	0	0	0	0	0	0	0	0	0	0	0
A0A0P0VZB6	A0A0P0VZB6_ORYSJ	Os03g0568400 protein	Os03g0568400 OSNPB_030568400	Oryza sativa subsp. japonica (Rice)		membrane [GO:0016020]	heme binding [GO:0020037]; iron ion binding [GO:0005506]; monooxygenase activity [GO:0004497]; oxidoreductase activity, acting on paired donors, with incorporation or reduction of molecular oxygen [GO:0016705]	TGRSLTRNGR	0.97942	-6.8113	0	0	0	0	0	0	0	0	0	0	0	0	0	9.9928	0	0	0	0	0	0	0	0	0	0	0	0	0
A0A0P0VZC1	A0A0P0VZC1_ORYSJ	Os03g0399600 protein	Os03g0399600 OSNPB_030399600	Oryza sativa subsp. japonica (Rice)				APREAPLLPARVGR	0.96453	-0.001448	0	0	0	0	0	0	0	0	0	0	0	0	0	0	0	0	0	0	0	0	11.8207	0	0	0	0	0	0
A0A0P0VZG2	A0A0P0VZG2_ORYSJ	Os03g0410000 protein	Os03g0410000 OSNPB_030410000	Oryza sativa subsp. japonica (Rice)				AIWPSILK	0.97479	-3.2122	0	0	0	0	0	0	0	0	9.91507	0	0	0	0	0	0	0	0	0	0	0	0	0	0	0	0	0	0
A0A0P0VZG5	A0A0P0VZG5_ORYSJ	Os03g0422900 protein	Os03g0422900 OSNPB_030422900	Oryza sativa subsp. japonica (Rice)	defense response [GO:0006952]; response to other organism [GO:0051707]		ADP binding [GO:0043531]; ATP binding [GO:0005524]	MKHLMYTLKVR	0.97911	-8.0623	0	0	0	0	0	0	0	0	0	0	0	0	0	0	0	14.114	0	0	13.5469	0	0	15.5187	0	0	0	0	0
A0A0P0VZG6	A0A0P0VZG6_ORYSJ	Os03g0570616 protein	Os03g0570616 OSNPB_030570616	Oryza sativa subsp. japonica (Rice)				GPVGMRPYGR	0.98413	-8.8442	0	0	0	0	0	0	0	0	0	0	0	0	0	0	0	0	0	0	0	0	0	0	0	0	0	0	0
A0A0P0VZK8	A0A0P0VZK8_ORYSJ	Os03g0416350 protein	Os03g0416350 OSNPB_030416350	Oryza sativa subsp. japonica (Rice)				AQPLSKVK	0.97248	-1.7021	0	0	0	0	0	0	0	0	0	0	0	0	0	0	0	0	0	0	0	0	0	0	0	0	0	0	0
A0A0P0VZL2	A0A0P0VZL2_ORYSJ	Os03g0576900 protein	Os03g0576900 OSNPB_030576900	Oryza sativa subsp. japonica (Rice)		membrane [GO:0016020]	polyamine transmembrane transporter activity [GO:0015203]	GMLPEFFAK	0.98162	-16.006	0	0	0	0	0	0	0	0	0	0	0	0	0	0	0	0	0	0	13.3504	0	0	9.31227	0	0	0	0	0
A0A0P0VZL5	A0A0P0VZL5_ORYSJ	Os03g0428650 protein	Os03g0428650 OSNPB_030428650	Oryza sativa subsp. japonica (Rice)				VIPGHLAISIPILKLYPVLLIR	0.97718	-21.985	0	0	0	0	0	0	0	0	0	0	0	0	0	0	0	0	0	0	0	0	0	0	0	0	0	0	0
A0A0P0VZM7	A0A0P0VZM7_ORYSJ	Os03g0425150 protein	Os03g0425150 OSNPB_030425150	Oryza sativa subsp. japonica (Rice)				QRGACIEETGKSTTR	0.97624	-4.3404	0	0	9.58581	0	0	0	0	0	0	0	0	0	0	0	0	0	0	0	0	0	0	0	0	0	0	0	0
A0A0P0VZR1	A0A0P0VZR1_ORYSJ	Os03g0582900 protein	Os03g0582900 OSNPB_030582900	Oryza sativa subsp. japonica (Rice)				LLPRSLLQATHEQR	0.97695	-6.9259	15.0229	0	0	0	0	12.9287	0	0	0	0	0	0	0	0	0	0	0	0	0	0	0	0	0	0	0	0	0
A0A0P0VZT9	A0A0P0VZT9_ORYSJ	Os03g0433733 protein	Os03g0433733 OSNPB_030433733	Oryza sativa subsp. japonica (Rice)				RRPDPAYITQATTLYK	0.96909	-2.1121	0	0	0	0	0	0	0	0	0	0	0	0	0	0	0	0	0	9.91988	0	0	0	0	0	0	0	0	0
A0A0P0VZX0	A0A0P0VZX0_ORYSJ	Os03g0583900 protein	Os03g0583900 OSNPB_030583900	Oryza sativa subsp. japonica (Rice)	RNA-mediated gene silencing [GO:0031047]			NFLHNCYSKKEK	0.98201	-7.7702	0	0	0	10.8431	0	0	0	0	0	0	0	0	0	0	0	0	0	0	0	0	0	0	0	0	0	0	0
A0A0P0VZX4	A0A0P0VZX4_ORYSJ	Os03g0441500 protein	Os03g0441500 OSNPB_030441500	Oryza sativa subsp. japonica (Rice)			ATP binding [GO:0005524]	FGLPGHNHLTPIVK	0.98775	-10.086	0	0	0	0	0	0	0	0	0	0	0	0	0	0	0	0	0	0	0	0	0	0	0	0	0	0	0
A0A0P0VZX6	A0A0P0VZX6_ORYSJ	Os03g0453051 protein	Os03g0453051 OSNPB_030453051	Oryza sativa subsp. japonica (Rice)				MNQHRQNR	0.95	-0.00052908	0	0	0	0	0	0	0	0	0	0	0	0	0	0	0	0	0	0	0	0	0	0	0	0	0	0	0
A0A0P0VZY2	A0A0P0VZY2_ORYSJ	Os03g0555000 protein	Os03g0555000 OSNPB_030555000	Oryza sativa subsp. japonica (Rice)				LSPQSGAQRR	0.98702	-10.019	0	0	0	0	0	10.7724	0	0	0	0	0	0	0	0	0	0	0	0	0	0	0	0	0	0	0	0	0
A0A0P0VZZ4	A0A0P0VZZ4_ORYSJ	Os03g0600400 protein	Os03g0600400 OSNPB_030600400	Oryza sativa subsp. japonica (Rice)				MQRLQAEQR	0.97397	-2.4684	0	0	0	0	0	0	0	0	0	0	0	0	0	0	0	0	0	0	0	0	0	0	0	0	0	0	0
A0A0P0W003	A0A0P0W003_ORYSJ	Os03g0603200 protein	Os03g0603200 OSNPB_030603200	Oryza sativa subsp. japonica (Rice)				RTVSSPIALRR	0.98348	-8.7488	0	0	0	0	0	0	0	0	0	0	0	0	0	14.7677	0	0	0	0	0	0	14.52	0	15.0915	0	0	0	0
A0A0P0W013	A0A0P0W013_ORYSJ	Os03g0604500 protein	Os03g0604500 OSNPB_030604500	Oryza sativa subsp. japonica (Rice)				AHMHRPLYISFRCSPR	0.96886	-2.112	0	0	0	0	0	0	0	0	0	0	0	0	0	0	0	0	0	0	0	0	0	0	0	0	0	0	0
A0A0P0W023	A0A0P0W023_ORYSJ	Os03g0570000 protein	Os03g0570000 OSNPB_030570000	Oryza sativa subsp. japonica (Rice)				RGRTGAA	1.0876	-0.00052908	0	0	0	0	0	0	0	0	0	9.26578	0	0	0	0	0	0	0	0	0	0	0	0	0	0	0	0	0
A0A0P0W035	A0A0P0W035_ORYSJ	Os03g0603701 protein	Os03g0603701 OSNPB_030603701	Oryza sativa subsp. japonica (Rice)				DMGKRGTYHVGPTWVPH	0.9765	-4.2101	0	0	0	0	0	0	0	0	0	0	0	0	0	0	9.31164	0	0	0	0	0	0	0	0	0	0	0	0
A0A0P0W039	A0A0P0W039_ORYSJ	Os03g0594500 protein	Os03g0594500 OSNPB_030594500	Oryza sativa subsp. japonica (Rice)				SDGRPAMR	0.98674	-9.9802	0	0	0	0	0	0	0	0	0	0	0	0	0	0	0	0	0	0	0	0	0	0	0	0	0	0	0
A0A0P0W056	A0A0P0W056_ORYSJ	Protein FAR1-RELATED SEQUENCE	Os03g0614250 OSNPB_030614250	Oryza sativa subsp. japonica (Rice)	regulation of DNA-templated transcription [GO:0006355]	nucleus [GO:0005634]	zinc ion binding [GO:0008270]	EKWVPAFFKK	0.97572	-6.2452	0	0	0	0	0	0	0	0	0	0	0	0	0	0	0	0	0	0	9.33136	0	0	10.8368	0	0	0	0	0
A0A0P0W058	A0A0P0W058_ORYSJ	Os03g0612201 protein	Os03g0612201 OSNPB_030612201	Oryza sativa subsp. japonica (Rice)				LQETQHRR	0.97392	-1.7021	0	0	0	0	0	0	0	0	0	0	0	0	0	0	0	0	0	0	0	0	0	0	0	13.8191	0	0	0
A0A0P0W063	A0A0P0W063_ORYSJ	Os03g0556500 protein	Os03g0556500 OSNPB_030556500	Oryza sativa subsp. japonica (Rice)				LEPLRAAAHR	0.97563	-6.2452	0	0	0	0	0	0	0	0	0	0	0	0	0	0	0	0	0	0	0	0	0	0	0	0	0	0	0
A0A0P0W064	A0A0P0W064_ORYSJ	Os03g0612450 protein	Os03g0612450 OSNPB_030612450	Oryza sativa subsp. japonica (Rice)				AEHLVHVGELGRLVR	0.98477	-12.402	9.15117	0	0	0	0	0	0	0	0	0	0	0	0	0	0	0	0	0	0	0	0	0	0	0	0	0	0
A0A0P0W0A2	A0A0P0W0A2_ORYSJ	Os03g0620800 protein	Os03g0620800 OSNPB_030620800	Oryza sativa subsp. japonica (Rice)	vesicle-mediated transport [GO:0016192]			LMNLLRGNGTK	0.98024	-8.0623	0	0	0	0	0	0	0	0	0	0	0	0	0	0	0	0	0	0	0	0	0	0	0	0	0	0	0
A0A0P0W0A5	A0A0P0W0A5_ORYSJ	Os03g0582300 protein	Os03g0582300 OSNPB_030582300	Oryza sativa subsp. japonica (Rice)				VYWYFRGKGK	0.97584	-6.2452	0	0	0	0	0	0	0	0	0	0	0	0	0	0	0	0	0	0	0	0	0	0	0	0	0	0	0
A0A0P0W0B6	A0A0P0W0B6_ORYSJ	Os03g0577350 protein	Os03g0577350 OSNPB_030577350	Oryza sativa subsp. japonica (Rice)				CRSARHHPHQAR	0.98237	-15.717	0	0	0	0	0	0	11.5266	0	0	0	0	0	0	0	0	0	0	0	0	0	0	0	10.4679	0	0	0	0
A0A0P0W0D4	A0A0P0W0D4_ORYSJ	Os03g0623033 protein	Os03g0623033 OSNPB_030623033	Oryza sativa subsp. japonica (Rice)				EIRHCRWLSVALPIVR	0.98166	-10.686	0	0	0	0	0	0	0	0	0	0	0	0	0	0	0	0	0	0	0	0	0	0	0	0	0	0	0
A0A0P0W0G4	A0A0P0W0G4_ORYSJ	Os03g0579200 protein	Os03g0579200 OSNPB_030579200	Oryza sativa subsp. japonica (Rice)	defense response [GO:0006952]; response to other organism [GO:0051707]		ADP binding [GO:0043531]; ATP binding [GO:0005524]	QPPHAARVVPVR	0.97783	-18.694	0	0	11.2035	0	0	0	0	0	0	0	0	0	0	0	0	9.17744	0	0	0	0	0	0	0	0	0	0	0
A0A0P0W0G6	A0A0P0W0G6_ORYSJ	Os03g0638100 protein	Os03g0638100 OSNPB_030638100	Oryza sativa subsp. japonica (Rice)				DGGRGQR	1.0907	-0.00052908	0	0	0	0	0	0	0	0	0	0	0	0	0	0	0	0	0	0	0	0	9.9632	0	0	0	0	0	0
A0A0P0W0H7	A0A0P0W0H7_ORYSJ	Os03g0630300 protein	Os03g0630300 OSNPB_030630300	Oryza sativa subsp. japonica (Rice)				LWRAWLR	1.0891	-0.00052908	0	0	0	0	0	0	0	0	0	0	0	0	0	0	0	0	0	0	0	0	0	0	0	0	0	0	0
A0A0P0W0P1	A0A0P0W0P1_ORYSJ	Os03g0592900 protein	Os03g0592900 OSNPB_030592900	Oryza sativa subsp. japonica (Rice)				TGPPISR	0.97665	-3.6711	0	0	0	0	0	0	0	0	0	0	0	0	0	0	0	0	0	0	0	0	0	0	0	0	0	0	0
A0A0P0W0P7	A0A0P0W0P7_ORYSJ	Os03g0632400 protein	Os03g0632400 OSNPB_030632400	Oryza sativa subsp. japonica (Rice)				MQSLLGRWWR	0.97128	-5.1097	0	0	0	0	0	0	0	0	0	0	0	0	0	0	0	0	0	0	0	0	0	0	0	11.45	0	0	0
A0A0P0W0Q4	A0A0P0W0Q4_ORYSJ	Os03g0648400 protein	Os03g0648400 OSNPB_030648400	Oryza sativa subsp. japonica (Rice)	protein folding [GO:0006457]	endoplasmic reticulum [GO:0005783]	Hsp70 protein binding [GO:0030544]; metal ion binding [GO:0046872]; unfolded protein binding [GO:0051082]	NVLCAKCKGK	0.97973	-6.8113	0	0	0	0	0	0	0	0	0	0	0	0	0	0	15.0219	0	0	0	0	0	0	0	0	0	0	0	0
A0A0P0W0S7	A0A0P0W0S7_ORYSJ	Os03g0606466 protein	Os03g0606466 OSNPB_030606466	Oryza sativa subsp. japonica (Rice)				ETNQINRTKFGLSLPR	0.98642	-9.7587	0	0	0	0	0	0	0	0	0	0	0	0	0	0	0	0	0	15.0155	0	0	0	0	0	0	15.9063	0	15.9899
A0A0P0W0T0	A0A0P0W0T0_ORYSJ	Os03g0597050 protein	Os03g0597050 OSNPB_030597050	Oryza sativa subsp. japonica (Rice)				MEVVDGR	0.98044	-6.3935	0	0	0	0	0	0	0	0	0	0	0	0	0	0	0	0	0	0	0	0	0	0	0	0	0	0	0
A0A0P0W0U2	A0A0P0W0U2_ORYSJ	Os03g0654800 protein	Os03g0654800 OSNPB_030654800	Oryza sativa subsp. japonica (Rice)		membrane [GO:0016020]		RRPWWPWYR	0.97003	-1.3909	0	0	0	0	0	0	9.33791	9.21558	0	0	0	0	0	0	0	0	0	0	0	0	0	0	9.96235	0	0	0	0
A0A0P0W0Z3	A0A0P0W0Z3_ORYSJ	Os03g0661250 protein	Os03g0661250 OSNPB_030661250	Oryza sativa subsp. japonica (Rice)				VVGLHHGVR	0.96953	-2.7229	0	0	0	0	0	0	0	0	0	0	0	0	0	0	0	0	0	0	0	0	0	0	0	0	0	0	0
A0A0P0W0Z4	A0A0P0W0Z4_ORYSJ	Os03g0625933 protein	Os03g0625933 OSNPB_030625933	Oryza sativa subsp. japonica (Rice)			metal ion binding [GO:0046872]; ubiquitin-protein transferase activity [GO:0004842]	AVRVDGGGGR	0.98458	-13.623	0	0	0	0	0	0	0	0	0	0	0	0	0	0	0	0	0	0	0	0	0	0	0	10.3909	0	0	0
A0A0P0W0Z9	A0A0P0W0Z9_ORYSJ	Os03g0619700 protein	Os03g0619700 OSNPB_030619700	Oryza sativa subsp. japonica (Rice)		membrane [GO:0016020]		SGGLGSRPEWRR	0.98325	-7.7702	0	0	0	0	0	0	0	0	0	0	0	0	0	0	0	0	0	0	0	0	0	0	0	0	0	0	0
A0A0P0W106	A0A0P0W106_ORYSJ	Os03g0663600 protein	Os03g0663600 OSNPB_030663600	Oryza sativa subsp. japonica (Rice)				AGAAVLVLLEHRAR	0.98493	-11.787	0	0	0	0	0	0	0	0	0	0	0	0	0	0	0	0	0	0	0	9.75912	0	0	0	0	0	0	0
A0A0P0W112	A0A0P0W112_ORYSJ	Os03g0629001 protein	Os03g0629001 OSNPB_030629001	Oryza sativa subsp. japonica (Rice)				GHPIRRRPPWRPLR	0.98781	-10.086	0	0	0	8.65023	0	0	0	0	0	0	0	0	0	0	0	0	0	0	0	0	0	0	0	0	0	0	0
A0A0P0W131	A0A0P0W131_ORYSJ	Os03g0639350 protein	Os03g0639350 OSNPB_030639350	Oryza sativa subsp. japonica (Rice)				LGRRHQLAR	0.97458	-2.4684	0	0	0	0	0	0	0	0	0	0	0	0	0	0	0	0	0	0	0	0	0	11.5922	0	0	0	0	0
A0A0P0W138	A0A0P0W138_ORYSJ	Os03g0639233 protein	Os03g0639233 OSNPB_030639233	Oryza sativa subsp. japonica (Rice)	aerobic respiration [GO:0009060]; electron transport coupled proton transport [GO:0015990]		NADH dehydrogenase (ubiquinone) activity [GO:0008137]	CFTTSHKLYVRR	0.9839	-10.701	0	0	0	0	0	0	0	0	0	0	0	0	0	0	0	0	0	0	0	0	0	0	0	0	0	0	0
A0A0P0W149	A0A0P0W149_ORYSJ	Os03g0625966 protein	Os03g0625966 OSNPB_030625966	Oryza sativa subsp. japonica (Rice)				HLLVVLEQR	0.98346	-14.51	0	0	0	0	0	0	0	0	0	0	0	0	0	0	0	0	0	0	0	0	0	0	0	9.40354	0	0	0
A0A0P0W171	A0A0P0W171_ORYSJ	Os03g0656075 protein	Os03g0656075 OSNPB_030656075	Oryza sativa subsp. japonica (Rice)				LLDTGDIILLFSVK	0.98427	-12.517	0	0	0	0	0	9.50508	0	0	0	0	0	0	0	0	0	0	0	0	0	0	0	0	0	0	0	0	0
A0A0P0W199	A0A0P0W199_ORYSJ	Os03g0643611 protein	Os03g0643611 OSNPB_030643611	Oryza sativa subsp. japonica (Rice)				GSADLAALLLRR	0.98756	-9.4717	0	0	0	0	0	0	0	0	0	0	0	0	9.10402	0	0	0	0	0	0	0	0	0	0	0	0	0	0
A0A0P0W1A8	A0A0P0W1A8_ORYSJ	Os03g0672950 protein	Os03g0672950 OSNPB_030672950	Oryza sativa subsp. japonica (Rice)				DVDVLPVER	0.97143	-4.5014	0	11.0084	0	0	11.5557	0	0	0	0	0	0	0	0	0	0	0	0	0	0	0	0	0	0	0	0	0	0
A0A0P0W1B4	A0A0P0W1B4_ORYSJ	Os03g0650200 protein	Os03g0650200 OSNPB_030650200	Oryza sativa subsp. japonica (Rice)	lignin biosynthetic process [GO:0009809]	membrane [GO:0016020]	heme binding [GO:0020037]; iron ion binding [GO:0005506]; monooxygenase activity [GO:0004497]; oxidoreductase activity, acting on paired donors, with incorporation or reduction of molecular oxygen [GO:0016705]	KLCATELFSPR	0.98584	-11.829	0	0	0	0	0	0	0	0	0	0	0	0	0	0	0	0	0	0	0	13.3461	0	0	0	0	0	0	0
A0A0P0W1D5	A0A0P0W1D5_ORYSJ	Os03g0679300 protein	Os03g0679300 OSNPB_030679300	Oryza sativa subsp. japonica (Rice)				NSPGPPKIG	0.97439	-2.4684	0	0	0	0	0	0	0	0	0	0	0	0	0	0	0	0	0	0	0	0	0	0	0	0	0	0	0
A0A0P0W1F4	A0A0P0W1F4_ORYSJ	Os03g0681100 protein	Os03g0681100 OSNPB_030681100	Oryza sativa subsp. japonica (Rice)				AAPGAPR	1.089	-0.00052908	0	0	0	0	0	0	0	0	8.75442	0	0	0	0	0	0	0	0	0	9.18938	0	0	0	0	0	0	0	0
A0A0P0W1H4	A0A0P0W1H4_ORYSJ	Os03g0642600 protein	Os03g0642600 OSNPB_030642600	Oryza sativa subsp. japonica (Rice)	cell surface receptor signaling pathway [GO:0007166]; protein phosphorylation [GO:0006468]	plasma membrane [GO:0005886]	ATP binding [GO:0005524]; polysaccharide binding [GO:0030247]; protein kinase activity [GO:0004672]	HQEAQFR	0.96782	-2.0335	0	0	0	0	0	0	0	0	0	0	0	0	0	0	0	0	0	0	0	0	0	0	0	0	0	0	0
A0A0P0W1K7	A0A0P0W1K7_ORYSJ	Os03g0659900 protein	Os03g0659900 OSNPB_030659900	Oryza sativa subsp. japonica (Rice)		membrane [GO:0016020]		FEVPALQRFIR	0.98289	-8.0623	0	12.8365	0	0	0	0	0	0	0	0	0	0	0	0	0	0	0	0	0	0	0	0	0	0	0	0	0
A0A0P0W1L2	A0A0P0W1L2_ORYSJ	Os03g0649800 protein	Os03g0649800 OSNPB_030649800	Oryza sativa subsp. japonica (Rice)				NSWLAGRQRR	0.97631	-6.2452	0	0	0	0	13.4972	0	0	0	0	0	0	0	0	13.0467	0	0	0	0	0	0	0	0	15.407	0	14.4769	13.9845	0
A0A0P0W1L9	A0A0P0W1L9_ORYSJ	Inositol hexakisphosphate and diphosphoinositol-pentakisphosphate kinase (EC 2.7.4.24)	Os03g0689100 OSNPB_030689100	Oryza sativa subsp. japonica (Rice)	phosphorylation [GO:0016310]	cytosol [GO:0005829]	ATP binding [GO:0005524]; diphosphoinositol-pentakisphosphate kinase activity [GO:0033857]; inositol heptakisphosphate kinase activity [GO:0000829]; inositol hexakisphosphate 1-kinase activity [GO:0052723]; inositol hexakisphosphate 3-kinase activity [GO:0052724]; inositol hexakisphosphate 5-kinase activity [GO:0000832]; inositol-1,3,4,5,6-pentakisphosphate kinase activity [GO:0000827]	LQEVGSCLTLDK	0.97539	-4.8136	0	0	0	0	0	0	0	0	0	0	0	0	0	0	0	0	0	0	0	0	0	0	0	9.43686	0	0	0
A0A0P0W1M7	A0A0P0W1M7_ORYSJ	Nuclear transcription factor Y subunit	Os03g0696300 OSNPB_030696300	Oryza sativa subsp. japonica (Rice)	regulation of transcription by RNA polymerase II [GO:0006357]	nucleus [GO:0005634]	DNA-binding transcription factor activity, RNA polymerase II-specific [GO:0000981]; RNA polymerase II cis-regulatory region sequence-specific DNA binding [GO:0000978]	HQHAMRR	1.083	-0.00052908	0	0	0	0	0	0	0	0	0	0	0	0	0	0	0	0	0	0	0	0	0	0	0	0	0	0	0
A0A0P0W1N1	A0A0P0W1N1_ORYSJ	Plasma membrane ATPase (EC 7.1.2.1)	Os03g0689300 OSNPB_030689300	Oryza sativa subsp. japonica (Rice)	proton export across plasma membrane [GO:0120029]	plasma membrane [GO:0005886]	ATP binding [GO:0005524]; ATP hydrolysis activity [GO:0016887]; P-type proton-exporting transporter activity [GO:0008553]	HICGMTG	0.96837	-2.0335	0	0	0	0	0	0	0	0	0	0	0	0	0	0	0	0	0	0	0	8.64749	0	0	0	0	0	0	0
A0A0P0W1P4	A0A0P0W1P4_ORYSJ	Os03g0695100 protein	Os03g0695100 OSNPB_030695100	Oryza sativa subsp. japonica (Rice)				LTGVVPEK	0.97634	-3.735	0	0	0	0	0	0	0	0	0	0	0	0	0	0	0	0	0	0	0	0	0	0	0	0	0	0	0
A0A0P0W1T1	A0A0P0W1T1_ORYSJ	Os03g0695400 protein	Os03g0695400	Oryza sativa subsp. japonica (Rice)				SARVAGPHHRR	0.98296	-8.0623	0	0	0	0	0	0	0	0	0	0	0	0	0	0	0	0	0	0	0	0	0	0	0	0	0	0	0
A0A0P0W1U5	A0A0P0W1U5_ORYSJ	Os03g0700750 protein	Os03g0700750 OSNPB_030700750	Oryza sativa subsp. japonica (Rice)				RLTVGRFGR	0.97426	-2.4684	0	0	0	0	0	0	0	0	0	0	0	0	0	0	0	0	0	0	0	0	0	0	0	0	0	0	0
A0A0P0W1V7	A0A0P0W1V7_ORYSJ	Os03g0664150 protein	Os03g0664150 OSNPB_030664150	Oryza sativa subsp. japonica (Rice)				RQRAPAVPTDWR	0.98597	-7.7702	0	0	0	0	0	0	0	0	0	0	0	0	0	0	0	10.1562	0	0	0	0	0	0	0	0	0	0	0
A0A0P0W201	A0A0P0W201_ORYSJ	Os03g0677700 protein	Os03g0677700 OSNPB_030677700	Oryza sativa subsp. japonica (Rice)				VSSTRTVR	0.98379	-1.7021	0	0	0	0	0	0	0	0	0	0	0	0	0	0	0	0	0	0	0	0	0	0	0	0	0	0	0
A0A0P0W207	A0A0P0W207_ORYSJ	Os03g0680400 protein	Os03g0680400 OSNPB_030680400	Oryza sativa subsp. japonica (Rice)		intracellular organelle [GO:0043229]		NHVEILFPFTSPVR	0.98157	-0.1146	0	0	0	0	13.4774	0	0	0	0	0	12.1251	0	0	0	0	0	0	0	0	0	0	0	0	0	0	0	0
A0A0P0W213	A0A0P0W213_ORYSJ	Os03g0670900 protein	Os03g0670900 OSNPB_030670900	Oryza sativa subsp. japonica (Rice)				EHEVVVALLPHGR	0.98582	-13.018	0	0	0	0	0	0	0	0	9.06639	0	0	0	0	0	0	0	0	0	0	0	0	0	0	0	0	0	0
A0A0P0W234	A0A0P0W234_ORYSJ	Os03g0682822 protein	Os03g0682822 OSNPB_030682822	Oryza sativa subsp. japonica (Rice)				HGAVDELRGVVRR	0.98544	-9.2834	0	0	0	0	0	0	13.3537	0	0	0	11.645	0	0	0	0	0	0	0	0	0	14.325	0	0	0	0	0	0
A0A0P0W240	A0A0P0W240_ORYSJ	Os03g0692350 protein	Os03g0692350 OSNPB_030692350	Oryza sativa subsp. japonica (Rice)				RDVPLQLPLHAR	0.98761	-9.4717	0	0	0	0	0	0	0	0	0	10.9667	0	0	0	0	0	0	0	0	0	0	0	0	0	0	0	0	0
A0A0P0W257	A0A0P0W257_ORYSJ	Os03g0695000 protein	Os03g0695000 OSNPB_030695000	Oryza sativa subsp. japonica (Rice)	regulation of programmed cell death [GO:0043067]		metal ion binding [GO:0046872]; ubiquitin-protein transferase activity [GO:0004842]	TAEAAELERWR	0.96899	-2.5454	0	0	0	0	0	0	0	0	0	0	0	0	10.5255	0	0	0	0	0	0	0	0	0	0	0	0	0	0
A0A0P0W271	A0A0P0W271_ORYSJ	Os03g0680800 protein	Os03g0680800 OSNPB_030680800	Oryza sativa subsp. japonica (Rice)	regulation of DNA-templated transcription [GO:0006355]	nucleus [GO:0005634]	DNA binding [GO:0003677]	SKDKIATSEDK	0.98236	-8.0623	0	0	0	0	0	0	12.928	0	0	0	0	0	0	0	0	0	0	0	0	0	0	0	0	0	0	0	0
A0A0P0W290	A0A0P0W290_ORYSJ	Os03g0713700 protein	Os03g0713700 OSNPB_030713700	Oryza sativa subsp. japonica (Rice)	Arp2/3 complex-mediated actin nucleation [GO:0034314]; endocytic recycling [GO:0032456]; exocytosis [GO:0006887]; retrograde transport, endosome to Golgi [GO:0042147]	cytosol [GO:0005829]; early endosome [GO:0005769]; recycling endosome [GO:0055037]; WASH complex [GO:0071203]	actin binding [GO:0003779]; alpha-tubulin binding [GO:0043014]; gamma-tubulin binding [GO:0043015]	EKLSAISRR	0.9678	-1.3911	0	0	0	0	0	0	0	0	0	0	0	0	0	0	0	0	0	0	0	0	0	0	0	9.49085	0	0	0
A0A0P0W298	A0A0P0W298_ORYSJ	rRNA N-glycosylase (EC 3.2.2.22)	Os03g0688100 OSNPB_030688100	Oryza sativa subsp. japonica (Rice)	defense response [GO:0006952]; negative regulation of translation [GO:0017148]	membrane [GO:0016020]	rRNA N-glycosylase activity [GO:0030598]; toxin activity [GO:0090729]	SGLLLLLFFALAVYLLDLSAGR	0.97217	-2.0463	0	0	0	0	0	0	0	0	0	0	0	0	0	0	0	0	0	0	0	0	0	0	0	0	0	0	0
A0A0P0W2A2	A0A0P0W2A2_ORYSJ	Os03g0687100 protein	Os03g0687100 OSNPB_030687100	Oryza sativa subsp. japonica (Rice)				HEQHRELPRR	0.98084	-6.8113	0	0	0	0	0	0	0	0	0	0	0	0	0	0	0	0	0	0	0	0	0	0	0	0	0	0	9.80515
A0A0P0W2B3	A0A0P0W2B3_ORYSJ	Os03g0719300 protein	Os03g0719300 OSNPB_030719300	Oryza sativa subsp. japonica (Rice)	glycerol metabolic process [GO:0006071]		glycerone kinase activity [GO:0004371]	RGLAGTILVHK	0.98303	-8.0623	0	0	0	0	0	0	0	0	0	0	0	0	0	0	0	0	0	0	0	0	0	0	0	0	0	0	0
A0A0P0W2D4	A0A0P0W2D4_ORYSJ	Os03g0688450 protein	Os03g0688450 OSNPB_030688450	Oryza sativa subsp. japonica (Rice)				RFMRENCLR	0.98268	-14.673	0	0	0	0	0	0	0	0	0	0	0	0	0	0	0	0	0	0	0	0	0	0	0	0	0	0	0
A0A0P0W2E8	A0A0P0W2E8_ORYSJ	Os03g0722200 protein	Os03g0722200 OSNPB_030722200	Oryza sativa subsp. japonica (Rice)				SGGGGSR	0.97506	-3.6711	0	0	9.30809	0	0	0	0	0	8.3996	9.21072	0	8.62381	0	9.2471	0	0	0	0	0	0	0	0	0	0	0	0	0
A0A0P0W2F9	A0A0P0W2F9_ORYSJ	Os03g0726900 protein	Os03g0726900 OSNPB_030726900	Oryza sativa subsp. japonica (Rice)	DNA repair [GO:0006281]; interstrand cross-link repair [GO:0036297]; protein monoubiquitination [GO:0006513]	Fanconi anaemia nuclear complex [GO:0043240]; nucleus [GO:0005634]	ubiquitin protein ligase activity [GO:0061630]	YCKKWYILR	0.97421	-2.4684	0	0	0	0	0	0	0	10.6522	0	0	0	0	0	0	0	0	0	0	0	0	0	0	0	0	0	0	0
A0A0P0W2G4	A0A0P0W2G4_ORYSJ	Os03g0722000 protein	Os03g0722000 OSNPB_030722000	Oryza sativa subsp. japonica (Rice)		cytosol [GO:0005829]; plasma membrane [GO:0005886]		RVPLPWELFQPVLR	0.96429	-0.1146	0	0	0	0	0	0	0	12.2244	0	0	0	0	0	0	0	0	13.8602	0	0	0	0	0	0	0	0	0	0
A0A0P0W2G6	A0A0P0W2G6_ORYSJ	Os03g0712000 protein	Os03g0712000 OSNPB_030712000	Oryza sativa subsp. japonica (Rice)	lipid catabolic process [GO:0016042]			LCPPYRLSHDR	0.97807	-6.3608	0	0	0	0	13.3198	0	0	0	0	0	0	0	0	0	0	0	0	0	0	0	0	0	0	0	0	0	0
A0A0P0W2H2	A0A0P0W2H2_ORYSJ	Os03g0703100 protein	Os03g0703100 OSNPB_030703100	Oryza sativa subsp. japonica (Rice)	carbohydrate metabolic process [GO:0005975]		beta-D-fucosidase activity [GO:0033907]; beta-galactosidase activity [GO:0004565]; beta-glucosidase activity [GO:0008422]	IVAALGHDTGTDPPNR	0.9831	-10.686	0	0	0	0	0	0	0	0	0	0	0	0	0	0	0	0	0	0	0	0	13.4838	0	0	0	0	0	0
A0A0P0W2I2	A0A0P0W2I2_ORYSJ	Os03g0728900 protein	Os03g0728900 OSNPB_030728900	Oryza sativa subsp. japonica (Rice)		nucleus [GO:0005634]	DNA-binding transcription factor activity [GO:0003700]; protein dimerization activity [GO:0046983]	LLQDLVPGCSKITGK	0.97565	-1.2684	0	11.2692	0	0	0	0	0	0	0	0	0	0	0	0	0	0	0	0	0	0	0	0	0	0	0	0	0
A0A0P0W2M6	A0A0P0W2M6_ORYSJ	1-phosphatidylinositol-4-phosphate 5-kinase (EC 2.7.1.68)	Os03g0701800 OSNPB_030701800	Oryza sativa subsp. japonica (Rice)	phosphorylation [GO:0016310]	membrane [GO:0016020]	1-phosphatidylinositol-4-phosphate 5-kinase activity [GO:0016308]; ATP binding [GO:0005524]	KQNINENTTLK	0.98296	-8.0623	0	0	0	0	0	0	0	0	0	0	0	0	0	0	0	0	0	0	0	0	0	0	0	0	0	0	0
A0A0P0W2P6	A0A0P0W2P6_ORYSJ	Os03g0708700 protein	Os03g0708700 OSNPB_030708700	Oryza sativa subsp. japonica (Rice)			myosin XI tail binding [GO:0080115]	EFIKQCVRSLK	0.97842	-6.3608	0	0	0	0	0	10.5299	0	0	0	0	0	0	0	0	0	0	0	0	0	0	0	0	0	0	0	0	0
A0A0P0W2R2	A0A0P0W2R2_ORYSJ	Serine hydroxymethyltransferase (EC 2.1.2.1)	Os03g0738400 OSNPB_030738400	Oryza sativa subsp. japonica (Rice)	glycine biosynthetic process from serine [GO:0019264]; tetrahydrofolate interconversion [GO:0035999]		glycine hydroxymethyltransferase activity [GO:0004372]; pyridoxal phosphate binding [GO:0030170]	EVMYDFEDK	0.97779	-18.351	0	0	0	0	0	0	0	0	0	0	0	0	0	0	0	0	0	0	0	0	0	0	0	0	0	9.24512	0
A0A0P0W2U1	A0A0P0W2U1_ORYSJ	Os03g0723901 protein	Os03g0723901 OSNPB_030723901	Oryza sativa subsp. japonica (Rice)				NTFKVVVPGDGRQP	0.96975	-0.0017054	0	0	9.57001	0	0	0	0	0	0	0	0	0	0	0	0	0	0	0	0	0	0	0	9.29244	0	0	0	0
A0A0P0W2X5	A0A0P0W2X5_ORYSJ	Os03g0744800 protein	Os03g0744800 OSNPB_030744800	Oryza sativa subsp. japonica (Rice)		membrane [GO:0016020]		LRCAFDFRCK	0.97215	-3.2084	0	0	0	0	0	0	0	0	0	0	0	0	0	0	0	0	0	0	0	0	0	0	0	0	0	9.72187	0
A0A0P0W2X7	A0A0P0W2X7_ORYSJ	Os03g0731025 protein	Os03g0731025 OSNPB_030731025	Oryza sativa subsp. japonica (Rice)				AMYIPAAER	0.96695	-2.7229	0	0	0	0	0	0	0	0	0	8.90575	9.30866	0	0	0	0	0	0	0	0	0	0	0	0	0	0	0	0
A0A0P0W2Y6	A0A0P0W2Y6_ORYSJ	Expressed protein (Os03g0720400 protein)	B1377B10.14 Os03g0720400	Oryza sativa subsp. japonica (Rice)				IFVVDTVEK	0.97501	-34.567	0	16.9868	0	15.8161	15.8349	0	0	0	0	0	0	16.1571	0	0	0	17.0151	17.0511	0	17.0249	17.0727	0	0	0	17.3156	11.794	16.3828	0
A0A0P0W314	A0A0P0W314_ORYSJ	Os03g0749200 protein	Os03g0749200 OSNPB_030749200	Oryza sativa subsp. japonica (Rice)				DGQVQVVPLRLRVR	0.9851	-11.787	0	0	0	0	0	0	0	0	0	0	0	0	0	0	0	0	0	0	0	0	9.82431	0	10.0034	0	0	0	0
A0A0P0W329	A0A0P0W329_ORYSJ	Transcriptional adapter	Os03g0750800 OSNPB_030750800	Oryza sativa subsp. japonica (Rice)	regulation of histone acetylation [GO:0035065]; regulation of transcription by RNA polymerase II [GO:0006357]	nucleus [GO:0005634]	transcription coactivator activity [GO:0003713]	EHEVNAQKAK	0.98029	-6.8113	0	0	0	0	0	0	0	0	0	0	0	0	0	0	0	0	0	9.49165	0	0	0	0	0	0	0	0	0
A0A0P0W333	A0A0P0W333_ORYSJ	Os03g0741900 protein	Os03g0741900 OSNPB_030741900	Oryza sativa subsp. japonica (Rice)		membrane [GO:0016020]		PEFLFRITAK	0.97579	-6.2452	0	0	0	0	0	0	0	0	0	0	0	0	0	0	11.4732	0	0	0	0	0	0	0	0	0	0	0	0
A0A0P0W339	A0A0P0W339_ORYSJ	Os03g0749650 protein	Os03g0749650 OSNPB_030749650	Oryza sativa subsp. japonica (Rice)				HAPAAAK	0.9758	-3.6711	0	0	0	0	0	0	0	0	0	0	0	0	0	0	0	0	0	0	0	0	0	9.29453	0	0	0	0	0
A0A0P0W366	A0A0P0W366_ORYSJ	Growth-regulating factor	Os03g0729500 OSNPB_030729500	Oryza sativa subsp. japonica (Rice)	developmental process [GO:0032502]; DNA-templated transcription [GO:0006351]; regulation of DNA-templated transcription [GO:0006355]	nucleus [GO:0005634]	ATP binding [GO:0005524]	DDLGSVVVNHPSIR	0.98543	-10.086	0	0	0	0	0	0	0	0	0	0	0	0	0	0	0	0	0	0	0	0	0	0	0	0	0	0	0
A0A0P0W380	A0A0P0W380_ORYSJ	Os03g0758350 protein	Os03g0758350 OSNPB_030758350	Oryza sativa subsp. japonica (Rice)				QPVQGRPPEAPR	0.98474	-11.505	0	0	0	0	0	0	0	0	0	0	0	0	0	0	0	0	0	0	0	0	0	0	0	0	0	0	0
A0A0P0W398	A0A0P0W398_ORYSJ	Os03g0755300 protein	Os03g0755300 OSNPB_030755300	Oryza sativa subsp. japonica (Rice)				DYPYKRGG	0.98113	-1.7021	0	0	0	0	0	0	0	0	0	0	0	0	0	0	0	0	9.73369	0	0	0	0	0	0	0	0	0	0
A0A0P0W3B6	A0A0P0W3B6_ORYSJ	Os03g0757600 protein	Os03g0757600 OSNPB_030757600	Oryza sativa subsp. japonica (Rice)			UDP-glycosyltransferase activity [GO:0008194]	RRYNIQNVFK	0.98013	-6.8113	0	0	0	0	0	0	0	0	0	0	0	0	0	0	0	0	0	0	0	0	0	0	0	0	0	0	0
A0A0P0W3D2	A0A0P0W3D2_ORYSJ	Os03g0735200 protein	Os03g0735200 OSNPB_030735200	Oryza sativa subsp. japonica (Rice)	RNA modification [GO:0009451]	intracellular membrane-bounded organelle [GO:0043231]	RNA binding [GO:0003723]	AALQHLPR	0.97878	-3.735	0	0	0	0	0	0	0	0	0	0	0	0	0	0	0	0	0	0	0	0	0	0	0	0	0	0	0
A0A0P0W3D5	A0A0P0W3D5_ORYSJ	Os03g0759250 protein	Os03g0759250 OSNPB_030759250	Oryza sativa subsp. japonica (Rice)				TTSLITVKGKQQK	0.98246	-10.985	0	0	0	0	0	0	0	0	0	0	0	0	0	0	0	0	0	0	0	0	0	0	0	0	0	9.67559	0
A0A0P0W3E1	A0A0P0W3E1_ORYSJ	Os03g0762450 protein	Os03g0762450 OSNPB_030762450	Oryza sativa subsp. japonica (Rice)				AIMSVWDR	0.98144	-10.546	0	0	0	0	0	0	0	0	0	0	0	0	0	0	0	0	0	0	0	17.4234	0	0	0	0	0	0	0
A0A0P0W3E4	A0A0P0W3E4_ORYSJ	Os03g0752100 protein	Os03g0752100 OSNPB_030752100	Oryza sativa subsp. japonica (Rice)				CKASTSK	0.98079	-16.264	0	0	9.68464	0	0	0	0	0	0	0	0	0	0	0	0	0	0	0	0	0	0	0	0	0	0	0	0
A0A0P0W3H5	A0A0P0W3H5_ORYSJ	Os03g0773050 protein	Os03g0773050 OSNPB_030773050	Oryza sativa subsp. japonica (Rice)				HLQRRRPAR	0.98473	-13.907	0	0	0	0	0	0	0	9.80045	0	0	0	0	0	0	9.66017	0	0	0	0	0	0	0	10.464	0	0	0	0
A0A0P0W3H9	A0A0P0W3H9_ORYSJ	Os03g0767166 protein	Os03g0767166 OSNPB_030767166	Oryza sativa subsp. japonica (Rice)				ADPAPMR	0.97511	-3.6711	0	0	0	0	0	0	0	0	0	0	0	0	0	0	0	0	0	0	0	0	0	0	0	0	0	0	0
A0A0P0W3J4	A0A0P0W3J4_ORYSJ	Os03g0744900 protein	Os03g0744900 OSNPB_030744900	Oryza sativa subsp. japonica (Rice)				GSPATALLNVVSPK	0.96094	-0.1146	0	0	16.805	0	0	0	0	0	0	0	0	0	0	0	0	0	0	0	0	0	0	0	0	0	0	0	16.872
A0A0P0W3M9	A0A0P0W3M9_ORYSJ	Os03g0747600 protein	Os03g0747600 OSNPB_030747600	Oryza sativa subsp. japonica (Rice)	positive regulation of transcription by RNA polymerase II [GO:0045944]	nucleus [GO:0005634]	acyltransferase activity, transferring groups other than amino-acyl groups [GO:0016747]; chromatin binding [GO:0003682]; histone binding [GO:0042393]; metal ion binding [GO:0046872]; RNA polymerase II transcription regulatory region sequence-specific DNA binding [GO:0000977]; transcription corepressor activity [GO:0003714]	KLSTSVNCSNKNESK	0.98381	-10.701	0	0	0	0	0	0	0	0	0	0	0	12.3323	0	0	0	0	0	0	0	0	0	0	0	0	0	0	0
A0A0P0W3Q0	A0A0P0W3Q0_ORYSJ	Os03g0759125 protein	Os03g0759125 OSNPB_030759125	Oryza sativa subsp. japonica (Rice)				AVQGGVAASARPCR	0.97753	-21.809	0	0	0	0	0	0	0	0	0	0	0	0	0	0	0	0	0	0	0	0	0	0	0	0	0	0	0
A0A0P0W3Q5	A0A0P0W3Q5_ORYSJ	Os03g0751200 protein	Os03g0751200 OSNPB_030751200	Oryza sativa subsp. japonica (Rice)				VHVHLRR	1.0851	-0.00052908	0	0	0	0	12.5858	0	0	0	0	0	0	0	0	0	0	0	0	0	0	0	0	0	0	0	0	0	0
A0A0P0W3R2	A0A0P0W3R2_ORYSJ	Os03g0778550 protein	Os03g0778550 OSNPB_030778550	Oryza sativa subsp. japonica (Rice)				GMWILPITG	0.97333	-4.5014	0	0	13.083	0	0	0	0	0	0	0	0	0	0	0	0	0	0	0	0	0	0	0	0	0	0	0	0
A0A0P0W3R4	A0A0P0W3R4_ORYSJ	Os03g0779150 protein	Os03g0779150 OSNPB_030779150	Oryza sativa subsp. japonica (Rice)				QLNLSVGILWVLQKR	0.96911	-1.2684	0	0	0	0	0	0	0	0	0	0	0	0	0	0	0	0	0	0	0	0	0	0	0	0	0	0	9.04338
A0A0P0W3S0	A0A0P0W3S0_ORYSJ	Os03g0761700 protein	Os03g0761700 OSNPB_030761700	Oryza sativa subsp. japonica (Rice)		endoplasmic reticulum [GO:0005783]		ESNVVEWLKWYR	0.98522	-9.0158	0	0	0	0	0	0	0	0	0	0	0	0	0	0	0	0	0	11.1037	9.93391	13.3191	12.885	0	0	0	0	0	0
A0A0P0W3S7	A0A0P0W3S7_ORYSJ	Os03g0757132 protein	Os03g0757132 OSNPB_030757132	Oryza sativa subsp. japonica (Rice)				MRPWLTSVLTK	0.97337	-3.1204	0	0	0	0	0	0	0	0	0	0	0	0	0	0	0	0	0	0	0	9.82991	0	0	0	0	12.7451	0	0
A0A0P0W3W0	A0A0P0W3W0_ORYSJ	Os03g0757051 protein	Os03g0757051 OSNPB_030757051	Oryza sativa subsp. japonica (Rice)				TFGTARVASAQSPQTR	0.98565	-12.387	0	0	0	0	0	0	0	0	0	0	0	0	0	0	0	0	0	0	0	0	0	0	0	0	0	0	0
A0A0P0W3W5	A0A0P0W3W5_ORYSJ	Os03g0785401 protein	Os03g0785401 OSNPB_030785401	Oryza sativa subsp. japonica (Rice)				AVPVASKL	0.96987	-1.8802	0	0	0	0	0	0	0	0	0	0	0	0	0	0	0	0	0	0	0	0	0	0	0	0	0	0	0
A0A0P0W3W9	A0A0P0W3W9_ORYSJ	Os03g0788550 protein	Os03g0788550 OSNPB_030788550	Oryza sativa subsp. japonica (Rice)				KTKVNGLESGLLR	0.98307	-10.985	0	0	0	0	0	0	0	0	0	0	0	0	0	0	0	0	0	0	0	0	0	0	0	0	0	0	0
A0A0P0W3X2	A0A0P0W3X2_ORYSJ	Os03g0758300 protein	Os03g0758300 OSNPB_030758300	Oryza sativa subsp. japonica (Rice)		membrane [GO:0016020]		TWAAVNIQLAWRR	1.0951	-0.00052908	0	0	0	0	10.6255	0	0	0	0	0	0	0	0	0	0	0	0	0	0	0	0	0	0	0	0	0	0
A0A0P0W3X6	A0A0P0W3X6_ORYSJ	Os03g0769850 protein	Os03g0769850 OSNPB_030769850	Oryza sativa subsp. japonica (Rice)				YPRHCRHK	0.98326	-1.7021	0	0	0	0	0	0	0	0	0	0	0	0	0	0	0	10.7426	10.9487	0	0	0	0	0	0	0	0	0	0
A0A0P0W3Z5	A0A0P0W3Z5_ORYSJ	Os03g0790600 protein	Os03g0790600 OSNPB_030790600	Oryza sativa subsp. japonica (Rice)				KMGMIQDIFAIIK	0.98025	-17.23	0	0	0	0	0	0	0	0	0	0	0	0	0	0	0	0	0	0	0	0	0	0	0	0	0	0	0
A0A0P0W402	A0A0P0W402_ORYSJ	Expressed protein (Os03g0787100 protein)	Os03g0787100 OSJNBb0024J04.7	Oryza sativa subsp. japonica (Rice)				MAVATLSSR	0.97343	-4.5014	0	9.68284	0	0	0	0	0	0	0	0	0	0	0	0	0	0	0	0	0	10.6666	0	0	0	0	11.1527	9.96694	0
A0A0P0W410	A0A0P0W410_ORYSJ	Os03g0762500 protein	Os03g0762500 OSNPB_030762500	Oryza sativa subsp. japonica (Rice)		membrane [GO:0016020]		TRSAPGELRMK	0.97695	-6.3608	0	0	0	0	0	0	9.89149	0	0	0	0	0	0	0	0	0	0	0	0	0	0	0	0	0	0	0	0
A0A0P0W419	A0A0P0W419_ORYSJ	Os03g0792300 protein	Os03g0792300 OSNPB_030792300	Oryza sativa subsp. japonica (Rice)				APLYIRELYHRR	0.97513	-3.4819	0	0	0	0	0	0	0	0	0	0	0	0	0	0	0	0	0	0	0	0	0	0	0	0	9.39032	9.26301	0
A0A0P0W440	A0A0P0W440_ORYSJ	Os03g0794050 protein	Os03g0794050 OSNPB_030794050	Oryza sativa subsp. japonica (Rice)				AVVPALGLYPWVP	0.9857	-13.018	0	0	0	0	0	0	0	0	0	0	9.23716	0	0	0	0	0	0	0	0	0	0	0	0	0	0	0	0
A0A0P0W474	A0A0P0W474_ORYSJ	Os03g0793900 protein	Os03g0793900 OSNPB_030793900	Oryza sativa subsp. japonica (Rice)				LRLPHPHRQR	0.97638	-6.2452	0	0	0	0	0	0	0	0	0	0	0	0	0	0	0	17.2865	0	0	0	0	0	0	0	0	0	0	0
A0A0P0W477	A0A0P0W477_ORYSJ	Os03g0759375 protein	Os03g0759375 OSNPB_030759375	Oryza sativa subsp. japonica (Rice)				LSRPILLAGVSSSK	0.97734	-21.809	0	0	0	0	0	0	0	0	8.95012	0	0	0	0	0	0	0	0	0	0	0	0	0	0	0	0	0	0
A0A0P0W494	A0A0P0W494_ORYSJ	Os03g0796700 protein	Os03g0796700 OSNPB_030796700	Oryza sativa subsp. japonica (Rice)				AKPAPPR	0.98233	-15.827	0	0	0	0	0	10.0189	0	0	0	0	8.96498	0	0	0	0	0	0	0	0	0	0	0	0	0	0	9.96013	0
A0A0P0W4A0	A0A0P0W4A0_ORYSJ	Os03g0800050 protein	Os03g0800050 OSNPB_030800050	Oryza sativa subsp. japonica (Rice)				KIEAWISLRQACNAEK	0.9713	-2.112	0	0	0	0	0	0	0	0	0	0	0	0	0	0	0	0	10.0278	0	0	0	0	0	0	0	0	0	0
A0A0P0W4C9	A0A0P0W4C9_ORYSJ	Os03g0805400 protein	Os03g0805400 OSNPB_030805400	Oryza sativa subsp. japonica (Rice)		membrane [GO:0016020]		CKVKSDAK	0.97403	-1.7021	0	0	0	0	0	0	0	0	0	0	0	0	0	9.9613	0	0	0	0	0	0	0	0	0	0	0	0	0
A0A0P0W4G0	A0A0P0W4G0_ORYSJ	Os03g0782150 protein	Os03g0782150 OSNPB_030782150	Oryza sativa subsp. japonica (Rice)				MLFSTPPALATHR	0.9694	-2.2492	0	0	0	0	0	0	0	0	0	0	0	0	0	0	0	12.3561	0	0	0	0	0	0	0	0	0	0	0
A0A0P0W4G6	A0A0P0W4G6_ORYSJ	Os03g0787150 protein	Os03g0787150 OSNPB_030787150	Oryza sativa subsp. japonica (Rice)				EGHAEGEPVPALHRR	0.97608	-1.2681	0	0	0	0	0	0	0	0	0	9.27447	0	0	0	0	0	0	0	0	0	0	0	0	8.75118	0	0	0	0
A0A0P0W4K2	A0A0P0W4K2_ORYSJ	Os03g0810850 protein	Os03g0810850 OSNPB_030810850	Oryza sativa subsp. japonica (Rice)				LMSITFLTSEK	0.98372	-10.095	0	0	0	0	0	0	0	0	0	0	0	0	0	0	0	0	0	0	0	0	0	0	0	0	0	0	0
A0A0P0W4K4	A0A0P0W4K4_ORYSJ	Os03g0797600 protein	Os03g0797600 OSNPB_030797600	Oryza sativa subsp. japonica (Rice)				RLGVGDDAEGGGSKADR	0.98593	-12.272	0	0	0	0	0	0	0	0	0	0	0	0	0	0	10.0704	0	0	0	0	0	10.7083	0	0	0	0	0	0
A0A0P0W4M3	A0A0P0W4M3_ORYSJ	Os03g0808950 protein	Os03g0808950 OSNPB_030808950	Oryza sativa subsp. japonica (Rice)				RHGDDETVSCASK	0.97662	-21.007	0	0	0	0	0	0	0	0	0	0	0	0	0	0	0	0	0	0	9.57421	0	0	0	0	0	0	0	0
A0A0P0W4M5	A0A0P0W4M5_ORYSJ	Os03g0804250 protein	Os03g0804250 OSNPB_030804250	Oryza sativa subsp. japonica (Rice)				HQRSSFLIHRR	0.98222	-8.0623	0	0	0	0	0	0	0	0	0	0	0	0	0	0	0	0	0	0	0	0	0	0	0	0	0	0	0
A0A0P0W4N1	A0A0P0W4N1_ORYSJ	Os03g0806100 protein	Os03g0806100 OSNPB_030806100	Oryza sativa subsp. japonica (Rice)				LAARGLGTPWRR	0.99016	-7.7702	0	0	9.12959	0	0	0	0	0	0	0	0	0	0	0	0	0	0	0	0	0	0	0	0	0	0	0	0
A0A0P0W4U1	A0A0P0W4U1_ORYSJ	Os03g0799050 protein	Os03g0799050 OSNPB_030799050	Oryza sativa subsp. japonica (Rice)				LGLSCGLRLRLR	0.98902	-7.7702	0	0	0	0	0	0	0	0	0	0	0	0	0	0	0	0	0	0	0	0	0	0	0	0	0	0	0
A0A0P0W4Y2	A0A0P0W4Y2_ORYSJ	Os03g0803900 protein	Os03g0803900 OSNPB_030803900	Oryza sativa subsp. japonica (Rice)	protein glycosylation [GO:0006486]	Golgi membrane [GO:0000139]	carbohydrate binding [GO:0030246]; galactosyltransferase activity [GO:0008378]; glycosyltransferase activity [GO:0016757]	MAVRKTWMSAAQK	1.0836	-0.00052908	0	0	0	0	0	0	0	0	0	0	0	0	0	0	0	0	0	0	0	0	0	0	0	0	0	0	0
A0A0P0W4Y6	A0A0P0W4Y6_ORYSJ	Os03g0805900 protein	Os03g0805900 OSNPB_030805900	Oryza sativa subsp. japonica (Rice)		cytoplasm [GO:0005737]	2 iron, 2 sulfur cluster binding [GO:0051537]; metal ion binding [GO:0046872]; oxidoreductase activity [GO:0016491]	RQWISPTDAR	0.98435	-14.307	10.3501	0	0	0	0	0	0	0	0	0	0	0	0	0	0	0	0	0	0	0	0	0	0	0	0	0	0
A0A0P0W507	A0A0P0W507_ORYSJ	Os03g0816000 protein	Os03g0816000 OSNPB_030816000	Oryza sativa subsp. japonica (Rice)				MVCQRILTV	0.9728	-2.4684	0	0	0	0	0	0	0	0	0	0	0	0	0	0	0	0	0	0	0	0	0	0	0	0	0	0	0
A0A0P0W517	A0A0P0W517_ORYSJ	Os03g0821150 protein	Os03g0821150 OSNPB_030821150	Oryza sativa subsp. japonica (Rice)		membrane [GO:0016020]		QWSHIKEK	0.9822	-1.7021	0	0	0	0	0	0	0	0	0	0	0	0	0	0	0	0	0	0	0	0	0	0	0	0	0	0	0
A0A0P0W522	A0A0P0W522_ORYSJ	Os03g0793950 protein	Os03g0793950 OSNPB_030793950	Oryza sativa subsp. japonica (Rice)				NLVSVQTGPKDKAHK	0.98408	-12.402	0	0	0	0	0	0	0	0	0	0	0	0	0	8.73037	0	0	0	0	0	0	0	0	0	0	0	0	0
A0A0P0W524	A0A0P0W524_ORYSJ	Os03g0818000 protein	Os03g0818000 OSNPB_030818000	Oryza sativa subsp. japonica (Rice)	cell differentiation [GO:0030154]	membrane [GO:0016020]		AHADNLEQSKAMEK	0.98094	-16.288	8.80084	0	0	0	0	0	0	0	0	0	0	0	0	0	0	0	12.5955	0	0	0	0	0	0	0	0	0	0
A0A0P0W543	A0A0P0W543_ORYSJ	Os03g0826900 protein	Os03g0826900 OSNPB_030826900	Oryza sativa subsp. japonica (Rice)				FDLFLLSIVR	0.98493	-13.056	11.741	0	0	0	0	0	0	0	0	0	0	0	0	0	0	0	11.4054	0	0	0	0	0	0	0	0	0	0
A0A0P0W577	A0A0P0W577_ORYSJ	Os03g0838450 protein	Os03g0838450 OSNPB_030838450	Oryza sativa subsp. japonica (Rice)				GAADEEALVQRRPR	0.98721	-10.086	0	0	0	0	0	0	0	0	0	0	0	0	0	0	0	0	0	0	0	0	0	0	0	0	0	0	0
A0A0P0W581	A0A0P0W581_ORYSJ	Os03g0833500 protein	Os03g0833500 OSNPB_030833500	Oryza sativa subsp. japonica (Rice)				EHVARRRPCR	0.98269	-14.73	0	0	0	0	0	0	0	0	0	0	0	0	0	0	0	0	0	0	0	0	0	0	0	0	0	0	0
A0A0P0W594	A0A0P0W594_ORYSJ	Os03g0817600 protein	Os03g0817600 OSNPB_030817600	Oryza sativa subsp. japonica (Rice)				HKARCYLMSNR	0.98182	-15.644	11.182	0	0	0	0	0	0	0	0	0	0	0	0	0	0	0	0	0	0	0	0	0	0	0	0	0	0
A0A0P0W597	A0A0P0W597_ORYSJ	Os03g0841600 protein	Os03g0841600	Oryza sativa subsp. japonica (Rice)			UDP-glycosyltransferase activity [GO:0008194]	GDRPARQRR	0.98044	-16.318	0	0	0	0	0	0	0	11.2062	0	0	0	0	0	0	11.2898	0	0	0	0	0	0	0	0	0	0	0	0
A0A0P0W5C4	A0A0P0W5C4_ORYSJ	Os03g0840275 protein	Os03g0840275 OSNPB_030840275	Oryza sativa subsp. japonica (Rice)				AFPEKILR	0.97063	-1.8804	0	0	0	0	0	0	0	0	0	0	0	0	0	0	0	0	0	0	0	0	0	0	0	0	0	0	0
A0A0P0W5F4	A0A0P0W5F4_ORYSJ	Os03g0849500 protein	Os03g0849500 OSNPB_030849500	Oryza sativa subsp. japonica (Rice)	defense response [GO:0006952]; response to other organism [GO:0051707]		ADP binding [GO:0043531]; ATP binding [GO:0005524]	LELTQLENVTK	0.98485	-11.364	0	0	0	0	0	0	0	0	0	0	0	0	9.95465	0	0	0	0	0	15.1692	0	0	0	0	0	0	0	0
A0A0P0W5F5	A0A0P0W5F5_ORYSJ	Os03g0840050 protein	Os03g0840050 OSNPB_030840050	Oryza sativa subsp. japonica (Rice)				AGPRPFRR	0.97397	-1.7021	0	0	0	0	0	0	0	0	0	0	0	0	0	0	0	0	0	0	0	0	0	0	0	0	0	0	0
A0A0P0W5G5	A0A0P0W5G5_ORYSJ	Os03g0844050 protein	Os03g0844050 OSNPB_030844050	Oryza sativa subsp. japonica (Rice)				GGTRSRGPFQIYTK	0.98517	-10.086	0	0	0	0	0	0	0	0	0	0	0	0	0	0	0	0	0	0	0	0	0	0	0	0	0	0	12.6577
A0A0P0W5I2	A0A0P0W5I2_ORYSJ	Os03g0844500 protein	Os03g0844500 OSNPB_030844500	Oryza sativa subsp. japonica (Rice)				GRHDGEVGGVVVGVGDDGGR	0.97585	-3.7335	0	0	0	0	0	0	0	0	0	0	0	0	0	0	0	0	0	10.3544	0	0	0	0	0	0	0	0	0
A0A0P0W5I4	A0A0P0W5I4_ORYSJ	Os03g0810700 protein	Os03g0810700 OSNPB_030810700	Oryza sativa subsp. japonica (Rice)	mitochondrion organization [GO:0007005]; regulation of mitochondrion organization [GO:0010821]; small GTPase mediated signal transduction [GO:0007264]	mitochondrial outer membrane [GO:0005741]	calcium ion binding [GO:0005509]; GTP binding [GO:0005525]; GTPase activity [GO:0003924]	VPVILAGCK	0.97232	-4.5014	0	0	0	0	0	0	0	0	0	0	0	0	0	0	10.9868	0	0	0	0	0	0	0	0	0	0	0	0
A0A0P0W5K3	A0A0P0W5K3_ORYSJ	Os03g0825600 protein	Os03g0825600 OSNPB_030825600	Oryza sativa subsp. japonica (Rice)				DPGVRGAPPPADAR	0.98721	-10.086	0	0	0	0	0	0	0	0	0	0	0	0	0	0	0	0	0	11.8109	0	13.1624	0	0	0	0	0	0	0
A0A0P0W5N0	A0A0P0W5N0_ORYSJ	RNA helicase (EC 3.6.4.13)	Os03g0827700 OSNPB_030827700	Oryza sativa subsp. japonica (Rice)			ATP binding [GO:0005524]; hydrolase activity [GO:0016787]; RNA binding [GO:0003723]; RNA helicase activity [GO:0003724]; zinc ion binding [GO:0008270]	GSSYGSR	0.96208	-2.0335	0	0	0	0	0	0	0	0	0	0	0	0	0	0	0	0	0	0	0	0	0	0	0	0	0	0	0
A0A0P0W5Q6	A0A0P0W5Q6_ORYSJ	Os03g0854400 protein	Os03g0854400 OSNPB_030854400	Oryza sativa subsp. japonica (Rice)	regulation of gene expression [GO:0010468]; RNA processing [GO:0006396]	nucleus [GO:0005634]	double-stranded RNA binding [GO:0003725]; ribonuclease III activity [GO:0004525]	MGMAHVLSLLVVILVAIPSSR	0.97762	-19.215	0	0	0	0	0	0	0	0	0	0	0	0	0	0	0	0	0	0	0	0	0	0	0	0	0	0	0
A0A0P0W5R8	A0A0P0W5R8_ORYSJ	Os03g0834300 protein	Os03g0834300 OSNPB_030834300	Oryza sativa subsp. japonica (Rice)				WPQRPGHAHRR	0.97446	-3.1205	0	0	0	0	0	0	0	0	0	0	0	0	0	0	0	11.887	0	0	0	0	0	0	0	0	0	0	0
A0A0P0W5T0	A0A0P0W5T0_ORYSJ	Os03g0856600 protein	Os03g0856600 OSNPB_030856600	Oryza sativa subsp. japonica (Rice)				QELAPRR	1.1018	-0.00052908	0	0	0	0	0	0	0	0	0	0	0	0	9.77503	0	9.83678	0	0	0	0	0	0	0	0	0	0	0	0
A0A0P0W5X6	A0A0P0W5X6_ORYSJ	Os04g0100075 protein	Os04g0100075 OSNPB_040100075	Oryza sativa subsp. japonica (Rice)				FGGDDDR	0.97039	-2.034	0	0	0	0	0	0	0	0	0	0	0	0	0	0	0	0	0	0	0	0	0	0	0	0	0	0	0
A0A0P0W5Y5	A0A0P0W5Y5_ORYSJ	Os03g0828000 protein (Os03g0828901 protein)	Os03g0828000 Os03g0828901 OSNPB_030828000 OSNPB_030828901	Oryza sativa subsp. japonica (Rice)				ALGGASG	1.0901	-0.00052908	0	0	0	8.56026	0	8.90059	0	0	0	0	0	0	0	0	0	0	0	0	0	0	0	0	0	0	0	0	0
A0A0P0W5Y6	A0A0P0W5Y6_ORYSJ	Receptor-like serine/threonine-protein kinase (EC 2.7.11.1)	Os04g0103500 OSJNBa0094O15.4	Oryza sativa subsp. japonica (Rice)	protein phosphorylation [GO:0006468]; recognition of pollen [GO:0048544]	membrane [GO:0016020]	ATP binding [GO:0005524]; protein serine/threonine kinase activity [GO:0004674]	ERPITIPELNLTQLK	0.97781	-18.763	0	0	0	0	0	0	0	0	0	0	0	0	0	0	0	0	0	12.841	0	0	0	0	0	0	0	0	0
A0A0P0W5Z6	A0A0P0W5Z6_ORYSJ	Os04g0109900 protein	Os04g0109900 OSNPB_040109900	Oryza sativa subsp. japonica (Rice)	protein glycosylation [GO:0006486]	Golgi apparatus [GO:0005794]; membrane [GO:0016020]	glycosyltransferase activity [GO:0016757]	HLMLQQPPR	0.97109	-2.7229	0	0	0	0	0	0	0	0	0	0	0	0	0	0	0	0	0	0	0	0	0	0	0	0	0	0	0
A0A0P0W613	A0A0P0W613_ORYSJ	Os04g0111100 protein	Os04g0111100 OSNPB_040111100	Oryza sativa subsp. japonica (Rice)	defense response [GO:0006952]		ADP binding [GO:0043531]	DKGYELKQLK	0.98407	-8.5133	0	0	0	0	0	9.67895	16.5369	0	0	0	0	0	0	0	0	0	0	0	0	0	0	0	0	0	0	0	0
A0A0P0W618	A0A0P0W618_ORYSJ	Os04g0107650 protein	Os04g0107650 OSNPB_040107650	Oryza sativa subsp. japonica (Rice)				VVEWVQRQR	0.97089	-2.4684	0	0	0	0	0	0	0	0	0	0	0	0	0	0	0	0	0	0	0	0	0	0	0	0	0	13.7501	0
A0A0P0W625	A0A0P0W625_ORYSJ	Os04g0111225 protein	Os04g0111225 OSNPB_040111225	Oryza sativa subsp. japonica (Rice)			ATP binding [GO:0005524]	RVEIYPHN	0.97702	-3.7361	0	0	0	0	0	11.6883	0	0	0	0	0	0	10.3896	0	0	0	0	0	0	0	0	0	0	0	0	0	0
A0A0P0W627	A0A0P0W627_ORYSJ	Os04g0117250 protein	Os04g0117250 OSNPB_040117250	Oryza sativa subsp. japonica (Rice)				LLYEIHEEKKTYN	0.98332	-10.985	0	0	0	0	0	0	0	10.3734	0	0	0	0	0	0	9.33526	0	0	0	0	0	0	0	0	0	0	0	0
A0A0P0W644	A0A0P0W644_ORYSJ	Os04g0116100 protein	Os04g0116100 OSNPB_040116100	Oryza sativa subsp. japonica (Rice)				AKMRWPSR	0.98055	-1.7021	0	0	0	0	0	0	0	0	0	0	0	0	0	0	0	0	0	0	0	0	0	0	0	0	0	0	0
A0A0P0W661	A0A0P0W661_ORYSJ	Os04g0117500 protein	Os04g0117500 OSNPB_040117500	Oryza sativa subsp. japonica (Rice)		membrane [GO:0016020]	voltage-gated potassium channel activity [GO:0005249]	LRCASKLFAR	0.9859	-8.8448	0	0	0	0	0	0	0	0	0	0	0	0	0	0	0	0	9.44923	0	0	0	0	0	0	0	0	0	0
A0A0P0W690	A0A0P0W690_ORYSJ	Os04g0119601 protein	Os04g0119601 OSNPB_040119601	Oryza sativa subsp. japonica (Rice)				HVAGFLSLVRGGGAAPPASRR	0.97766	-19.215	0	0	0	0	0	0	0	0	0	0	0	0	0	0	0	0	0	0	0	0	0	0	0	0	0	0	0
A0A0P0W6A0	A0A0P0W6A0_ORYSJ	Os04g0114900 protein	Os04g0114900 OSNPB_040114900	Oryza sativa subsp. japonica (Rice)				YKHDIYKMK	0.97096	-2.4684	0	0	0	0	0	0	0	0	0	0	0	0	0	0	0	0	0	0	0	0	0	0	0	0	0	0	0
A0A0P0W6A5	A0A0P0W6A5_ORYSJ	Os04g0112766 protein	Os04g0112766 OSNPB_040112766	Oryza sativa subsp. japonica (Rice)				LYLFFPK	0.96325	-2.0335	0	0	0	0	0	0	0	0	0	0	0	0	0	0	0	0	0	0	0	0	0	0	0	0	0	0	0
A0A0P0W6A6	A0A0P0W6A6_ORYSJ	Os04g0126900 protein	Os04g0126900 OSNPB_040126900	Oryza sativa subsp. japonica (Rice)				HGSSGAR	0.97564	-3.6711	0	0	0	0	0	0	0	0	0	0	0	0	0	0	0	0	0	0	0	0	0	0	0	0	0	0	0
A0A0P0W6A9	A0A0P0W6A9_ORYSJ	Os04g0124666 protein	Os04g0124666 OSNPB_040124666	Oryza sativa subsp. japonica (Rice)			carbohydrate binding [GO:0030246]	NFLQIRGPCSR	0.9797	-8.0623	0	0	0	0	0	0	0	0	0	0	0	0	0	0	0	0	0	15.7511	0	0	0	0	0	0	0	0	0
A0A0P0W6B7	A0A0P0W6B7_ORYSJ	Os04g0129500 protein	Os04g0129500 OSNPB_040129500	Oryza sativa subsp. japonica (Rice)	endoplasmic reticulum to Golgi vesicle-mediated transport [GO:0006888]; intracellular protein transport [GO:0006886]	COPII vesicle coat [GO:0030127]		LDSVRQQLQLKLVR	0.98427	-14.255	0	0	0	0	0	0	11.56	0	0	0	0	0	0	0	0	0	0	0	0	0	0	0	0	0	0	0	0
A0A0P0W6C1	A0A0P0W6C1_ORYSJ	Os04g0122000 protein	Os04g0122000 OSNPB_040122000	Oryza sativa subsp. japonica (Rice)				LSGVIPVGLLSFEK	0.98386	-13.82	0	0	0	0	0	0	0	0	0	0	0	0	10.972	0	0	0	0	0	0	0	0	0	0	0	0	0	0
A0A0P0W6D7	A0A0P0W6D7_ORYSJ	Os04g0102150 protein	Os04g0102150 OSNPB_040102150	Oryza sativa subsp. japonica (Rice)				GLGASPR	0.98256	-10.096	0	0	0	0	0	0	0	0	0	0	0	0	0	0	0	0	0	0	0	0	0	0	0	0	0	0	0
A0A0P0W6K5	A0A0P0W6K5_ORYSJ	Os04g0149100 protein	Os04g0149100 OSNPB_040149100	Oryza sativa subsp. japonica (Rice)		membrane [GO:0016020]		EVRDIIFREWVR	0.97328	-3.4819	0	0	0	0	0	0	0	0	0	0	0	0	0	0	0	0	0	0	11.1893	0	0	0	0	11.4107	0	0	0
A0A0P0W6L4	A0A0P0W6L4_ORYSJ	Os04g0105900 protein	Os04g0105900 OSNPB_040105900	Oryza sativa subsp. japonica (Rice)				VPKNSFRLGFILR	0.98654	-9.2834	0	0	0	0	0	0	0	0	10.7073	0	0	0	10.5853	0	0	0	0	0	0	0	11.0715	0	0	0	0	0	0
A0A0P0W6M3	A0A0P0W6M3_ORYSJ	Os04g0135400 protein	Os04g0135400 OSNPB_040135400	Oryza sativa subsp. japonica (Rice)	defense response to bacterium [GO:0042742]; defense response to oomycetes [GO:0002229]; protein phosphorylation [GO:0006468]	plasma membrane [GO:0005886]	ATP binding [GO:0005524]; transmembrane receptor protein serine/threonine kinase activity [GO:0004675]	DIKPKNVLLDK	0.98596	-11.769	0	0	0	0	9.90296	0	0	0	0	0	0	0	0	0	0	0	0	0	0	11.68	0	9.54539	0	0	0	9.19195	0
A0A0P0W6Q1	A0A0P0W6Q1_ORYSJ	Os04g0139201 protein	Os04g0139201 OSNPB_040139201	Oryza sativa subsp. japonica (Rice)				LPCGLTILTTK	0.9836	-10.095	0	0	0	0	0	0	0	0	0	0	0	0	0	0	0	0	0	0	0	0	0	0	0	0	0	0	0
A0A0P0W6U7	A0A0P0W6U7_ORYSJ	Os04g0149200 protein	Os04g0149200 OSNPB_040149200	Oryza sativa subsp. japonica (Rice)				LLPQPIRWWR	0.97983	-6.8113	0	0	0	0	0	0	0	0	0	0	0	0	0	0	0	0	0	0	0	0	0	0	0	10.3273	0	0	0
A0A0P0W6U8	A0A0P0W6U8_ORYSJ	Os04g0129475 protein	Os04g0129475 OSNPB_040129475	Oryza sativa subsp. japonica (Rice)				SLPTLPPTQRR	0.96884	-2.5454	10.1648	15.4546	0	0	0	0	0	0	0	0	11.5661	0	0	0	0	0	12.325	0	12.4287	17.4234	0	0	17.6214	0	0	15.3197	0
A0A0P0W6V8	A0A0P0W6V8_ORYSJ	Os04g0133350 protein	Os04g0133350 OSNPB_040133350	Oryza sativa subsp. japonica (Rice)				GFKEDIHTYK	0.97787	-6.8113	0	0	0	0	0	0	0	0	0	0	0	0	0	0	0	0	0	0	0	0	0	0	0	0	0	0	0
A0A0P0W6X3	A0A0P0W6X3_ORYSJ	Os04g0137100 protein	Os04g0137100 OSNPB_040137100	Oryza sativa subsp. japonica (Rice)			pectate lyase activity [GO:0030570]	VETAQTIWK	0.97251	-4.5014	0	0	0	0	0	0	0	0	0	0	0	0	0	0	0	0	0	0	0	0	0	0	0	0	0	0	0
A0A0P0W6X5	A0A0P0W6X5_ORYSJ	Os04g0175450 protein	Os04g0175450 OSNPB_040175450	Oryza sativa subsp. japonica (Rice)				EHRRPGQPAR	0.98487	-13.056	0	0	0	0	0	0	0	0	0	0	0	0	0	0	0	0	0	0	0	0	0	0	0	10.3691	0	0	0
A0A0P0W6Y5	A0A0P0W6Y5_ORYSJ	Os04g0160600 protein	Os04g0160600 OSNPB_040160600	Oryza sativa subsp. japonica (Rice)				LVNENTELSNEKR	0.98654	-9.2834	0	0	0	0	0	0	0	0	0	0	0	0	0	0	0	0	0	0	0	0	0	14.1316	0	0	0	0	0
A0A0P0W6Z9	A0A0P0W6Z9_ORYSJ	Os04g0189000 protein	Os04g0189000 OSNPB_040189000	Oryza sativa subsp. japonica (Rice)			nucleic acid binding [GO:0003676]; zinc ion binding [GO:0008270]	HEPRAALIR	0.97251	-2.4684	0	0	0	0	0	0	0	0	0	0	0	0	8.70314	0	0	0	0	0	0	0	0	0	0	0	0	0	0
A0A0P0W733	A0A0P0W733_ORYSJ	Os04g0182250 protein	Os04g0182250 OSNPB_040182250	Oryza sativa subsp. japonica (Rice)				KIDLFQPYRTRPK	1.105	-0.00052908	0	0	0	0	0	0	14.8282	0	0	13.861	13.6154	0	13.7733	0	0	0	0	15.8161	0	0	0	0	0	16.0954	0	0	0
A0A0P0W744	A0A0P0W744_ORYSJ	Os04g0151866 protein	Os04g0151866 OSNPB_040151866	Oryza sativa subsp. japonica (Rice)				GHGTTSSGGL	0.97411	-4.5402	0	0	0	0	0	0	0	0	0	0	0	0	0	0	0	0	0	0	0	0	11.0082	0	0	0	0	0	0
A0A0P0W761	A0A0P0W761_ORYSJ	Os04g0194433 protein	Os04g0194433 OSNPB_040194433	Oryza sativa subsp. japonica (Rice)				RELREGVVAAAHR	0.98655	-9.2834	0	13.5127	13.5209	0	0	0	0	0	0	0	0	0	0	0	0	0	0	0	14.3937	0	14.325	0	0	0	0	12.9145	0
A0A0P0W764	A0A0P0W764_ORYSJ	Os04g0155550 protein	Os04g0155550 OSNPB_040155550	Oryza sativa subsp. japonica (Rice)				LRLRQCR	0.97301	-6.204	0	12.7351	12.8125	12.6222	12.5923	0	13.3838	14.974	13.595	0	0	12.6242	14.5294	0	0	0	12.6616	12.8048	12.5596	12.6671	12.5056	13.1832	13.3394	13.9463	12.9404	12.8434	0
A0A0P0W780	A0A0P0W780_ORYSJ	Os04g0205200 protein	Os04g0205200 OSNPB_040205200	Oryza sativa subsp. japonica (Rice)	defense response [GO:0006952]			KLEVSGINR	0.98396	-9.2797	9.18728	0	0	0	0	0	0	0	0	0	0	0	0	0	0	0	0	0	9.60199	0	0	0	9.13814	0	0	0	0
A0A0P0W781	A0A0P0W781_ORYSJ	Os04g0187700 protein	Os04g0187700 OSNPB_040187700	Oryza sativa subsp. japonica (Rice)				GEMHCRR	0.9831	-15.395	0	0	0	0	0	0	0	0	0	0	0	0	0	0	0	0	0	0	0	0	0	0	0	0	0	0	0
A0A0P0W789	A0A0P0W789_ORYSJ	Os04g0166000 protein	Os04g0166000 OSNPB_040166000	Oryza sativa subsp. japonica (Rice)				LCTILWPEK	0.97562	-4.5014	0	0	0	0	0	0	0	0	0	0	0	0	0	0	0	0	0	0	0	0	11.6048	0	0	0	0	0	0
A0A0P0W7A3	A0A0P0W7A3_ORYSJ	Os04g0152975 protein	Os04g0152975 OSNPB_040152975	Oryza sativa subsp. japonica (Rice)				KNLSKADDSR	0.97485	-32.441	0	0	11.0959	0	0	0	0	0	0	0	0	0	0	0	0	0	0	0	0	0	0	0	0	0	0	0	0
A0A0P0W7B4	A0A0P0W7B4_ORYSJ	Os04g0183500 protein	Os04g0183500 OSNPB_040183500	Oryza sativa subsp. japonica (Rice)				FYLDRIAR	1.1024	-0.00052908	0	0	0	0	0	0	0	0	0	0	0	0	0	0	0	0	0	0	10.8877	0	0	0	0	0	0	0	0
A0A0P0W7B8	A0A0P0W7B8_ORYSJ	Os04g0186450 protein	Os04g0186450 OSNPB_040186450	Oryza sativa subsp. japonica (Rice)				HGGAGPVVPVR	0.96853	-2.5454	14.7344	0	0	0	0	0	0	0	0	0	0	0	0	0	0	0	0	0	0	0	0	0	0	0	0	0	0
A0A0P0W7C2	A0A0P0W7C2_ORYSJ	Os04g0158400 protein	Os04g0158400 OSNPB_040158400	Oryza sativa subsp. japonica (Rice)				EKIMKELEDLK	0.97386	-4.8816	0	0	0	0	0	0	0	0	0	0	0	0	0	0	0	0	0	0	0	0	0	0	10.3226	0	0	0	0
A0A0P0W7E1	A0A0P0W7E1_ORYSJ	Os04g0191600 protein	Os04g0191600 OSNPB_040191600	Oryza sativa subsp. japonica (Rice)				LLASLPHDN	0.97261	-4.5014	11.2875	0	0	0	0	0	0	0	0	0	0	0	0	0	0	0	0	0	0	0	0	0	0	12.2918	0	0	0
A0A0P0W7F8	A0A0P0W7F8_ORYSJ	Os04g0177701 protein	Os04g0177701 OSNPB_040177701	Oryza sativa subsp. japonica (Rice)				GGKNCKK	0.9766	-3.7939	0	0	0	0	0	0	0	0	0	0	0	0	0	0	0	0	0	0	0	0	0	0	0	0	0	0	0
A0A0P0W7L4	A0A0P0W7L4_ORYSJ	Os04g0191600 protein	Os04g0191600 OSNPB_040191600	Oryza sativa subsp. japonica (Rice)				VSPVTSR	0.97548	-3.6711	0	0	0	0	0	0	0	0	0	0	0	0	0	0	0	0	0	0	11.0434	0	0	0	0	0	0	0	0
A0A0P0W7L5	A0A0P0W7L5_ORYSJ	Os04g0196850 protein	Os04g0196850 OSNPB_040196850	Oryza sativa subsp. japonica (Rice)				LAEVRLR	1.1031	-0.00052908	0	0	0	0	0	0	0	0	0	0	0	0	0	0	0	0	0	0	0	0	0	0	0	10.9346	0	0	0
A0A0P0W7L8	A0A0P0W7L8_ORYSJ	Os04g0178300 protein	Os04g0178300 OSNPB_040178300	Oryza sativa subsp. japonica (Rice)			terpene synthase activity [GO:0010333]	FSGPMLISK	0.97554	-4.5014	0	0	0	0	0	0	0	0	0	0	0	0	0	0	0	0	0	0	0	0	0	0	0	0	0	11.2541	0
A0A0P0W7M5	A0A0P0W7M5_ORYSJ	Os04g0207501 protein	Os04g0207501 OSNPB_040207501	Oryza sativa subsp. japonica (Rice)				HQSRTGMSCR	0.97963	-6.8113	0	0	0	0	0	10.6891	0	10.825	0	0	0	0	0	0	0	0	0	0	0	0	0	0	0	0	0	0	0
A0A0P0W7P0	A0A0P0W7P0_ORYSJ	Os04g0243902 protein	Os04g0243902 OSNPB_040243902	Oryza sativa subsp. japonica (Rice)				MHKITTERLDR	0.97374	-3.1204	0	0	0	0	0	0	0	0	0	0	0	0	0	0	0	0	0	0	0	0	0	0	9.21354	0	0	0	0
A0A0P0W7R2	A0A0P0W7R2_ORYSJ	Os04g0226600 protein	Os04g0226600 OSNPB_040226600	Oryza sativa subsp. japonica (Rice)	recognition of pollen [GO:0048544]	membrane [GO:0016020]		EEQKLRSVHR	0.97901	-6.8113	0	0	0	0	0	0	0	0	0	0	0	0	0	0	0	0	0	9.93749	0	0	0	0	0	0	0	0	0
A0A0P0W7S2	A0A0P0W7S2_ORYSJ	Os04g0208450 protein	Os04g0208450 OSNPB_040208450	Oryza sativa subsp. japonica (Rice)				KNAHDGGGLAR	0.97063	-3.1201	0	0	0	0	0	0	0	0	0	0	0	0	0	0	0	0	0	0	0	0	0	0	0	0	8.55819	0	0
A0A0P0W7T6	A0A0P0W7T6_ORYSJ	Os04g0234300 protein	Os04g0234300 OSNPB_040234300	Oryza sativa subsp. japonica (Rice)				GWSHGQR	0.96976	-2.0335	0	0	0	0	0	0	0	0	0	0	0	0	0	0	0	0	0	0	0	0	0	0	0	0	0	0	0
A0A0P0W7U6	A0A0P0W7U6_ORYSJ	Os04g0207300 protein	Os04g0207300 OSNPB_040207300	Oryza sativa subsp. japonica (Rice)				REEGHMIVWTR	0.97839	-6.3608	0	0	14.3304	0	0	0	0	0	0	0	0	0	0	0	0	0	0	0	0	0	0	0	0	0	0	0	0
A0A0P0W7V0	A0A0P0W7V0_ORYSJ	Os04g0199166 protein	Os04g0199166 OSNPB_040199166	Oryza sativa subsp. japonica (Rice)				LVGWIGLR	0.97778	-20.366	0	0	0	0	0	0	0	0	0	0	0	0	0	0	0	0	0	0	0	14.0876	0	0	0	0	0	0	0
A0A0P0W7V4	A0A0P0W7V4_ORYSJ	Os04g0257350 protein	Os04g0257350 OSNPB_040257350	Oryza sativa subsp. japonica (Rice)		membrane [GO:0016020]		VKELGVAL	0.98436	-1.7021	0	0	0	0	0	0	0	0	0	0	0	0	0	0	12.0444	11.6313	0	0	0	0	0	12.3889	0	0	11.4527	0	0
A0A0P0W7W5	A0A0P0W7W5_ORYSJ	Os04g0211600 protein	Os04g0211600 OSNPB_040211600	Oryza sativa subsp. japonica (Rice)			nucleic acid binding [GO:0003676]; RNA-DNA hybrid ribonuclease activity [GO:0004523]	FEEPPAR	0.9819	-15.94	0	0	0	0	0	0	0	0	0	0	0	0	0	0	0	14.6476	0	0	0	0	0	0	0	0	0	0	0
A0A0P0W7Y1	A0A0P0W7Y1_ORYSJ	Methyltransferase (EC 2.1.1.-)	Os04g0218400 OSNPB_040218400	Oryza sativa subsp. japonica (Rice)	methylation [GO:0032259]	cytoplasm [GO:0005737]; membrane [GO:0016020]	methyltransferase activity [GO:0008168]	GMRWNCDKHDTEYK	0.98051	-0.1146	0	0	0	0	0	0	0	0	0	0	0	0	0	0	0	0	0	0	0	0	0	0	0	0	0	0	0
A0A0P0W7Z0	A0A0P0W7Z0_ORYSJ	Os04g0256250 protein	Os04g0256250 OSNPB_040256250	Oryza sativa subsp. japonica (Rice)				ATPLLEFLR	0.96771	-2.7229	8.8856	0	0	0	0	0	0	0	0	0	0	0	0	0	0	0	0	0	0	0	0	0	0	0	0	0	0
A0A0P0W7Z6	A0A0P0W7Z6_ORYSJ	Os04g0221375 protein	Os04g0221375 OSNPB_040221375	Oryza sativa subsp. japonica (Rice)				NNAAATATAAASTTR	0.98421	-10.701	0	0	0	0	0	0	0	9.52871	0	0	0	0	0	0	0	0	0	0	0	0	0	0	0	0	0	0	0
A0A0P0W7Z8	A0A0P0W7Z8_ORYSJ	Os04g0271750 protein	Os04g0271750 OSNPB_040271750	Oryza sativa subsp. japonica (Rice)				AAAAHGR	0.97529	-3.6711	0	0	0	0	0	0	0	0	0	0	0	0	0	0	0	0	0	0	0	0	10.874	0	0	0	0	0	0
A0A0P0W812	A0A0P0W812_ORYSJ	Os04g0228300 protein	Os04g0228300 OSNPB_040228300	Oryza sativa subsp. japonica (Rice)				GKHLWCLRPTFLLR	0.98512	-10.086	0	0	0	0	0	0	0	0	10.1957	0	0	0	0	0	0	0	0	0	0	0	9.80374	0	0	0	0	0	0
A0A0P0W828	A0A0P0W828_ORYSJ	Os04g0274100 protein	Os04g0274100 OSNPB_040274100	Oryza sativa subsp. japonica (Rice)				QVVRPSR	0.97018	-2.0335	0	0	0	0	0	9.5935	0	0	0	0	0	10.0868	0	0	0	10.2334	10.5999	10.589	0	0	0	0	10.8409	0	0	10.0557	0
A0A0P0W881	A0A0P0W881_ORYSJ	Os04g0208332 protein	Os04g0208332 OSNPB_040208332	Oryza sativa subsp. japonica (Rice)				VLHAGAR	0.97399	-5.7686	15.278	0	0	0	0	0	0	0	0	0	0	0	0	0	15.4602	0	0	0	0	0	0	0	0	0	0	13.3149	0
A0A0P0W884	A0A0P0W884_ORYSJ	Os04g0286333 protein	Os04g0286333 OSNPB_040286333	Oryza sativa subsp. japonica (Rice)				KYVRIAYETTAAITK	0.98385	-12.402	0	0	0	0	0	0	0	0	0	0	0	0	0	0	0	0	0	0	0	0	0	0	0	0	0	0	0
A0A0P0W888	A0A0P0W888_ORYSJ	Os04g0295901 protein	Os04g0295901 OSNPB_040295901	Oryza sativa subsp. japonica (Rice)				GLLGTLPAASAGATGRR	0.98061	-6.5159	0	0	0	0	0	0	0	0	0	0	0	0	0	0	0	0	0	0	0	0	0	0	0	0	0	11.4016	0
A0A0P0W889	A0A0P0W889_ORYSJ	Os04g0306300 protein	Os04g0306300 OSNPB_040306300	Oryza sativa subsp. japonica (Rice)				AGELRDDQRR	0.97403	-3.2085	0	0	9.88911	0	0	0	0	0	0	0	0	0	0	0	0	0	0	0	0	0	0	0	0	0	0	10.0748	0
A0A0P0W891	A0A0P0W891_ORYSJ	Os04g0298400 protein	Os04g0298400 OSNPB_040298400	Oryza sativa subsp. japonica (Rice)				MAVIPMPPPIR	0.96981	-2.5454	0	0	0	0	0	0	16.5369	0	0	0	0	0	0	0	16.4314	0	0	0	0	0	17.3993	0	0	0	0	0	0
A0A0P0W8A0	A0A0P0W8A0_ORYSJ	Os04g0298066 protein	Os04g0298066 OSNPB_040298066	Oryza sativa subsp. japonica (Rice)				RCPPIRAVPR	0.97879	-6.2452	0	0	0	0	0	0	0	0	16.6384	0	0	0	0	0	11.4732	0	0	17.3031	0	0	0	0	0	0	0	0	0
A0A0P0W8A8	A0A0P0W8A8_ORYSJ	Os04g0225400 protein	Os04g0225400 OSNPB_040225400	Oryza sativa subsp. japonica (Rice)				LSTNTVPWK	0.97405	-4.5014	15.7027	0	0	15.8196	0	0	0	0	0	0	0	0	14.2842	0	0	0	0	0	0	0	0	0	0	15.1692	0	0	0
A0A0P0W8A9	A0A0P0W8A9_ORYSJ	Os04g0301700 protein	Os04g0301700 OSNPB_040301700	Oryza sativa subsp. japonica (Rice)		membrane [GO:0016020]	glucuronosyltransferase activity [GO:0015020]	FVDDSPVLKK	0.97919	-6.8113	0	0	0	0	0	0	0	0	0	0	0	0	9.81542	0	0	0	0	0	0	0	0	0	0	0	0	0	0
A0A0P0W8B3	A0A0P0W8B3_ORYSJ	Os04g0304250 protein	Os04g0304250 OSNPB_040304250	Oryza sativa subsp. japonica (Rice)				LAAPRAAAVAPR	0.98682	-9.4717	0	0	0	0	0	0	0	0	0	0	0	0	0	0	0	0	0	0	0	0	0	0	12.4689	0	0	0	0
A0A0P0W8C0	A0A0P0W8C0_ORYSJ	Os04g0306800 protein	Os04g0306800 OSNPB_040306800	Oryza sativa subsp. japonica (Rice)	negative regulation of mRNA polyadenylation [GO:1900364]; regulation of mRNA stability [GO:0043488]	nucleus [GO:0005634]	metal ion binding [GO:0046872]; poly(A) binding [GO:0008143]	TAQALPQDELR	0.98489	-10.095	0	0	0	0	0	0	0	0	0	0	0	0	0	0	0	0	0	9.28944	0	0	0	0	0	0	0	0	0
A0A0P0W8D1	A0A0P0W8D1_ORYSJ	Os04g0219550 protein	Os04g0219550 OSNPB_040219550	Oryza sativa subsp. japonica (Rice)				MAHVQELYRI	0.97824	-6.8113	0	15.4104	0	0	0	0	0	0	0	0	0	0	0	0	0	0	0	0	0	0	0	0	0	0	0	15.4681	0
A0A0P0W8F9	A0A0P0W8F9_ORYSJ	Os04g0313301 protein	Os04g0313301 OSNPB_040313301	Oryza sativa subsp. japonica (Rice)				YLELVMWIHVF	0.9763	-4.4521	0	0	8.61754	0	0	0	0	0	0	0	0	0	0	0	0	0	0	0	0	0	0	0	0	0	0	0	0
A0A0P0W8G3	A0A0P0W8G3_ORYSJ	Os04g0310500 protein	Os04g0310500 OSNPB_040310500	Oryza sativa subsp. japonica (Rice)		mitochondrial respiratory chain complex I [GO:0005747]		FLNFLFLYLLR	0.97294	-3.1204	0	0	0	0	0	0	0	0	0	0	0	0	0	0	0	0	11.8217	11.8444	0	0	0	0	0	0	0	10.8813	0
A0A0P0W8I5	A0A0P0W8I5_ORYSJ	Os04g0307200 protein	Os04g0307200 OSNPB_040307200	Oryza sativa subsp. japonica (Rice)				GKGKVANGVAHQK	0.98448	-10.985	0	0	0	0	10.2005	0	0	0	0	0	0	0	0	0	0	0	0	0	0	0	0	0	0	0	0	0	0
A0A0P0W8I9	A0A0P0W8I9_ORYSJ	Os04g0283399 protein	Os04g0283399 OSNPB_040283399	Oryza sativa subsp. japonica (Rice)				LPPRSFSPSIPTPR	0.98687	-10.086	0	0	0	0	0	0	0	0	0	0	0	0	0	0	0	0	0	0	0	0	0	0	0	14.5944	0	0	0
A0A0P0W8Q1	A0A0P0W8Q1_ORYSJ	Os04g0341933 protein	Os04g0341933 OSNPB_040341933	Oryza sativa subsp. japonica (Rice)				DRSDLAS	1.0929	-0.00052908	0	0	0	0	14.0588	0	0	0	0	0	0	0	0	0	0	0	0	0	0	0	0	0	0	0	0	0	0
A0A0P0W8T7	A0A0P0W8T7_ORYSJ	Os04g0347400 protein	Os04g0347400 OSNPB_040347400	Oryza sativa subsp. japonica (Rice)		nucleus [GO:0005634]	DNA binding [GO:0003677]	DFGARPAVVTTR	0.98698	-7.7702	0	0	0	0	0	0	9.72634	0	0	0	0	0	0	0	0	0	0	0	0	0	0	0	0	0	0	0	0
A0A0P0W8V5	A0A0P0W8V5_ORYSJ	Glycosyltransferase (EC 2.4.1.-)	Os04g0321100 OSNPB_040321100	Oryza sativa subsp. japonica (Rice)			quercetin 3-O-glucosyltransferase activity [GO:0080043]; quercetin 7-O-glucosyltransferase activity [GO:0080044]	LIDEVLLA	0.97087	-5.1097	0	0	0	0	0	0	0	0	0	0	0	0	0	0	0	0	0	0	0	0	0	0	0	0	0	0	0
A0A0P0W8X6	A0A0P0W8X6_ORYSJ	Os04g0326300 protein	Os04g0326300 OSNPB_040326300	Oryza sativa subsp. japonica (Rice)	tRNA methylation [GO:0030488]	nucleus [GO:0005634]; tRNA (m1A) methyltransferase complex [GO:0031515]		KLSVQPHVQVFSQD	0.95627	-0.0011077	0	0	0	0	0	0	0	0	0	0	0	0	0	0	0	0	0	0	0	0	0	0	0	0	0	0	12.5291
A0A0P0W8Y6	A0A0P0W8Y6_ORYSJ	Os04g0341800 protein	Os04g0341800 OSNPB_040341800	Oryza sativa subsp. japonica (Rice)			magnesium ion binding [GO:0000287]; terpene synthase activity [GO:0010333]	IDLMIEDEWR	0.98408	-8.8442	0	0	0	9.05053	0	0	0	0	0	0	0	0	0	0	0	0	0	0	0	0	0	0	0	0	0	0	0
A0A0P0W8Z7	A0A0P0W8Z7_ORYSJ	Os04g0351300 protein	Os04g0351300 OSNPB_040351300	Oryza sativa subsp. japonica (Rice)				VMPWEGERRWR	0.97862	-6.3608	0	0	0	0	0	0	0	0	0	0	0	0	0	0	0	0	0	0	0	0	0	0	0	0	0	0	0
A0A0P0W912	A0A0P0W912_ORYSJ	Os04g0294401 protein	Os04g0294401 OSNPB_040294401	Oryza sativa subsp. japonica (Rice)				KGNGGGSSSLPLPVRLG	0.97983	-17.382	0	0	0	0	0	0	0	0	10.3847	0	0	0	12.553	0	0	0	0	0	0	0	0	0	0	0	0	0	0
A0A0P0W925	A0A0P0W925_ORYSJ	Os04g0354300 protein	Os04g0354300 OSNPB_040354300	Oryza sativa subsp. japonica (Rice)				KISLSPQSK	0.97729	-21.223	0	0	0	0	0	0	0	0	0	0	0	0	0	0	0	0	0	0	0	0	0	0	0	0	0	0	0
A0A0P0W938	A0A0P0W938_ORYSJ	Os04g0330301 protein	Os04g0330301 OSNPB_040330301	Oryza sativa subsp. japonica (Rice)				RLAPPLPPSPPSVPADRR	0.98405	-12.607	0	0	0	0	0	0	0	0	0	0	0	0	0	0	0	0	0	0	0	0	9.86821	9.95913	9.66114	0	0	0	0
A0A0P0W945	A0A0P0W945_ORYSJ	Os04g0338950 protein	Os04g0338950 OSNPB_040338950	Oryza sativa subsp. japonica (Rice)				TRDAVRSSWVSSLR	0.98687	-10.086	0	0	0	0	0	0	0	0	0	0	0	0	0	0	0	0	0	0	0	13.2509	0	0	0	0	0	0	0
A0A0P0W950	A0A0P0W950_ORYSJ	Os04g0366800 protein	Os04g0366800 OSNPB_040366800	Oryza sativa subsp. japonica (Rice)	cell surface receptor signaling pathway [GO:0007166]; protein phosphorylation [GO:0006468]	plasma membrane [GO:0005886]	ATP binding [GO:0005524]; protein kinase activity [GO:0004672]	GFIESIPVAIKRCK	0.98234	-10.21	15.5714	0	0	0	0	0	0	0	0	0	0	0	0	0	0	0	0	0	0	0	14.9614	0	0	0	0	0	0
A0A0P0W959	A0A0P0W959_ORYSJ	Os04g0336001 protein	Os04g0336001 OSNPB_040336001	Oryza sativa subsp. japonica (Rice)				RPLHRHLHR	0.97292	-2.4684	0	0	0	0	0	0	0	0	0	0	0	0	0	0	0	0	0	0	0	9.78763	0	0	0	0	0	0	0
A0A0P0W9D0	A0A0P0W9D0_ORYSJ	Os04g0347850 protein	Os04g0347850 OSNPB_040347850	Oryza sativa subsp. japonica (Rice)				LQSSRQLVKVGR	0.98767	-9.4717	0	0	0	0	0	0	0	0	0	0	0	0	0	0	0	0	0	0	0	0	0	0	0	0	0	0	12.5902
A0A0P0W9J3	A0A0P0W9J3_ORYSJ	Os04g0378750 protein	Os04g0378750 OSNPB_040378750	Oryza sativa subsp. japonica (Rice)				RRPHHIHQQLLLVPR	0.98497	-12.402	0	0	0	0	0	0	0	0	0	0	0	0	0	0	0	0	0	0	0	0	0	0	0	0	0	0	0
A0A0P0W9M1	A0A0P0W9M1_ORYSJ	Os04g0399600 protein	Os04g0399600 OSNPB_040399600	Oryza sativa subsp. japonica (Rice)		membrane [GO:0016020]		VTIWRSMMKK	0.98423	-8.3272	0	0	0	0	0	0	0	0	0	0	10.0455	0	0	0	0	0	0	0	0	0	0	0	0	0	0	0	0
A0A0P0W9M5	A0A0P0W9M5_ORYSJ	Os04g0397100 protein	Os04g0397100 OSNPB_040397100	Oryza sativa subsp. japonica (Rice)			ATP binding [GO:0005524]; ATP hydrolysis activity [GO:0016887]	LDMSEFMER	0.97182	-4.5014	0	0	0	0	0	0	0	0	0	11.3174	0	0	0	0	0	0	0	0	0	0	0	0	0	0	0	0	0
A0A0P0W9M9	A0A0P0W9M9_ORYSJ	Os04g0348800 protein	Os04g0348800 OSNPB_040348800	Oryza sativa subsp. japonica (Rice)	cytokinin-activated signaling pathway [GO:0009736]; phosphorelay signal transduction system [GO:0000160]			MAQKEGLPAGR	0.96784	-2.5454	11.7505	0	0	0	0	0	0	0	0	0	0	0	0	0	0	0	0	0	0	0	0	0	0	0	0	0	0
A0A0P0W9N3	A0A0P0W9N3_ORYSJ	Os04g0360650 protein	Os04g0360650 OSNPB_040360650	Oryza sativa subsp. japonica (Rice)				AAGSAPVVGDVEVHRVLR	0.98225	-10.393	0	0	0	0	0	0	0	0	0	0	0	0	0	0	0	0	0	0	0	0	0	0	0	0	0	0	0
A0A0P0W9Q4	A0A0P0W9Q4_ORYSJ	Os04g0357850 protein	Os04g0357850 OSNPB_040357850	Oryza sativa subsp. japonica (Rice)	DNA demethylation [GO:0080111]; DNA repair [GO:0006281]		DNA demethylase activity [GO:0035514]; DNA N-glycosylase activity [GO:0019104]	AAAAAAAAVRATARR	0.97722	-1.2684	0	0	0	0	14.6492	0	0	0	0	0	0	0	0	0	0	0	0	0	0	0	0	0	0	0	0	0	0
A0A0P0W9Q5	A0A0P0W9Q5_ORYSJ	Os04g0374125 protein	Os04g0374125 OSNPB_040374125	Oryza sativa subsp. japonica (Rice)				CALSGDVPHFPNQMFR	0.97302	-2.1119	0	0	0	0	0	0	0	0	0	0	0	0	0	0	0	0	0	0	0	0	0	0	0	9.56485	0	0	0
A0A0P0W9R6	A0A0P0W9R6_ORYSJ	Os04g0405100 protein	Os04g0405100 OSNPB_040405100	Oryza sativa subsp. japonica (Rice)	protein insertion into mitochondrial inner membrane [GO:0045039]; protein targeting to chloroplast [GO:0045036]	chloroplast inner membrane [GO:0009706]; TIM22 mitochondrial import inner membrane insertion complex [GO:0042721]	protein transmembrane transporter activity [GO:0008320]	EGMGQQKR	0.98548	-1.7021	0	0	0	0	0	0	9.33488	0	0	0	0	0	0	0	0	0	0	0	0	0	0	0	0	0	0	0	0
A0A0P0W9U3	A0A0P0W9U3_ORYSJ	Os04g0409200 protein	Os04g0409200 OSNPB_040409200	Oryza sativa subsp. japonica (Rice)	carbohydrate metabolic process [GO:0005975]; starch metabolic process [GO:0005982]	cytoplasm [GO:0005737]	1,4-alpha-glucan branching enzyme activity [GO:0003844]; hydrolase activity, hydrolyzing O-glycosyl compounds [GO:0004553]	DADEPTVEDKPR	0.98529	-11.505	0	0	0	0	0	0	0	0	0	0	0	0	0	0	0	0	0	0	0	0	0	0	0	0	0	0	0
A0A0P0W9V9	A0A0P0W9V9_ORYSJ	Os04g0371850 protein	Os04g0371850 OSNPB_040371850	Oryza sativa subsp. japonica (Rice)				AEPPAAARRSLPVS	0.98556	-11.787	0	0	0	0	0	0	0	0	0	0	0	0	0	0	0	0	0	0	9.89647	0	0	0	0	0	0	0	0
A0A0P0W9W5	A0A0P0W9W5_ORYSJ	Os04g0382800 protein	Os04g0382800 OSNPB_040382800	Oryza sativa subsp. japonica (Rice)				EQMLAGSGFIVSQGR	0.97692	-3.7741	0	0	0	0	0	0	0	0	0	0	10.9517	0	0	0	0	0	0	0	0	0	0	0	0	0	0	0	0
A0A0P0W9X0	A0A0P0W9X0_ORYSJ	Os04g0389100 protein	Os04g0389100 OSNPB_040389100	Oryza sativa subsp. japonica (Rice)	isoleucine biosynthetic process [GO:0009097]; valine biosynthetic process [GO:0009099]	acetolactate synthase complex [GO:0005948]	acetolactate synthase activity [GO:0003984]; flavin adenine dinucleotide binding [GO:0050660]; thiamine pyrophosphate binding [GO:0030976]	RAHPLHHQAQLPSPR	0.97213	-5.4314	0	0	0	0	0	0	0	0	0	0	0	0	0	0	0	0	0	0	0	0	0	0	0	0	0	0	0
A0A0P0W9X3	A0A0P0W9X3_ORYSJ	Os04g0407900 protein	Os04g0407900	Oryza sativa subsp. japonica (Rice)		membrane [GO:0016020]	heme binding [GO:0020037]; iron ion binding [GO:0005506]; monooxygenase activity [GO:0004497]; oxidoreductase activity, acting on paired donors, with incorporation or reduction of molecular oxygen [GO:0016705]	REQIDTVLPLINRR	0.98601	-11.759	0	0	0	0	0	0	0	0	0	0	0	0	0	0	0	0	0	0	0	0	0	0	0	0	0	0	0
A0A0P0W9X9	A0A0P0W9X9_ORYSJ	Os04g0386500 protein	Os04g0386500 OSNPB_040386500	Oryza sativa subsp. japonica (Rice)				GKYVSVK	0.97605	-4.171	0	0	0	0	0	0	0	0	0	0	0	0	0	0	0	0	0	10.0199	0	9.69653	0	11.0627	0	0	0	0	0
A0A0P0W9Z9	A0A0P0W9Z9_ORYSJ	Os04g0413100 protein	Os04g0413100	Oryza sativa subsp. japonica (Rice)				SGRAFPPPISVIGK	0.98536	-11.787	9.73161	0	0	0	0	0	0	0	0	0	0	0	0	0	0	0	0	0	0	0	0	0	0	0	0	0	0
A0A0P0WA00	A0A0P0WA00_ORYSJ	40S ribosomal protein S27	Os04g0399000 OSNPB_040399000	Oryza sativa subsp. japonica (Rice)	ribosomal small subunit assembly [GO:0000028]; translation [GO:0006412]	cytosolic small ribosomal subunit [GO:0022627]; plastid [GO:0009536]	metal ion binding [GO:0046872]; RNA binding [GO:0003723]; structural constituent of ribosome [GO:0003735]	AGAAHHLRR	0.97758	-18.408	0	0	0	0	0	0	0	0	0	0	0	0	0	0	0	0	0	0	0	0	0	0	9.31123	0	0	0	0
A0A0P0WA05	A0A0P0WA05_ORYSJ	Os04g0414250 protein	Os04g0414250 OSNPB_040414250	Oryza sativa subsp. japonica (Rice)				RCLPQLRK	0.98519	-1.7021	0	0	0	0	0	0	0	0	0	0	0	0	0	0	0	0	0	0	0	0	0	0	0	0	0	0	0
A0A0P0WA18	A0A0P0WA18_ORYSJ	Os04g0402100 protein	Os04g0402100 OSNPB_040402100	Oryza sativa subsp. japonica (Rice)	protein folding [GO:0006457]	endoplasmic reticulum [GO:0005783]; membrane [GO:0016020]	calcium ion binding [GO:0005509]; unfolded protein binding [GO:0051082]	YEVEKEKEK	0.97252	-2.4684	0	0	0	0	0	0	11.9933	0	0	0	0	0	0	0	0	0	0	0	0	0	0	0	12.628	0	0	0	0
A0A0P0WA21	A0A0P0WA21_ORYSJ	Os04g0417600 protein	Os04g0417600 OSNPB_040417600	Oryza sativa subsp. japonica (Rice)		nucleus [GO:0005634]		QNNTLRFSEKR	0.9803	-8.0623	0	0	0	0	0	0	10.702	0	0	0	0	0	0	0	0	0	0	0	0	0	0	0	0	0	0	0	0
A0A0P0WA27	A0A0P0WA27_ORYSJ	Os04g0410200 protein	Os04g0410200 OSNPB_040410200	Oryza sativa subsp. japonica (Rice)	protein phosphorylation [GO:0006468]	cytoplasm [GO:0005737]; nucleus [GO:0005634]; plasma membrane [GO:0005886]	ATP binding [GO:0005524]; protein serine/threonine kinase activity [GO:0004674]	FGKVSVLPEK	0.97566	-39.881	0	0	0	0	0	0	0	0	0	0	0	0	0	0	0	0	0	0	0	0	9.60383	0	0	0	0	0	0
A0A0P0WA31	A0A0P0WA31_ORYSJ	Os04g0398300 protein	Os04g0398300 OSNPB_040398300	Oryza sativa subsp. japonica (Rice)				GNTIGKR	1.0901	-0.00052908	0	0	0	0	0	0	0	0	0	0	0	0	0	0	0	0	0	0	17.7215	0	0	0	0	0	0	0	0
A0A0P0WA78	A0A0P0WA78_ORYSJ	Os04g0426900 protein	Os04g0426900 OSNPB_040426900	Oryza sativa subsp. japonica (Rice)				EQVKNGK	1.0898	-0.00052908	0	0	0	0	10.4689	0	0	0	0	0	0	0	0	0	0	0	0	0	0	0	0	0	0	0	0	0	0
A0A0P0WA81	A0A0P0WA81_ORYSJ	Os04g0414850 protein	Os04g0414850 OSNPB_040414850	Oryza sativa subsp. japonica (Rice)				RMAAACK	1.0884	-0.00052908	0	0	0	0	0	0	0	0	0	0	0	0	0	0	0	0	0	11.4152	0	0	0	0	0	0	0	0	0
A0A0P0WAB4	A0A0P0WAB4_ORYSJ	Os04g0413301 protein	Os04g0413301 OSNPB_040413301	Oryza sativa subsp. japonica (Rice)				RQPELPR	0.97596	-23.379	0	0	14.6318	0	9.18031	0	9.77977	0	0	0	0	0	0	0	0	14.7724	12.9385	10.3021	10.3457	0	0	0	0	0	14.1198	0	0
A0A0P0WAE4	A0A0P0WAE4_ORYSJ	Os04g0430950 protein	Os04g0430950 OSNPB_040430950	Oryza sativa subsp. japonica (Rice)		membrane [GO:0016020]		NRCATIRSR	0.97243	-2.4684	0	0	0	0	0	0	0	0	0	0	0	0	0	0	0	11.695	0	0	0	0	0	0	0	0	0	0	0
A0A0P0WAE5	A0A0P0WAE5_ORYSJ	Os04g0416400 protein	Os04g0416400 OSNPB_040416400	Oryza sativa subsp. japonica (Rice)			antioxidant activity [GO:0016209]; oxidoreductase activity [GO:0016491]	RRSRPCR	1.0921	-0.00052908	0	0	0	0	0	0	0	0	0	0	0	0	0	0	0	0	0	0	0	0	0	0	0	0	0	0	0
A0A0P0WAG1	A0A0P0WAG1_ORYSJ	Pectinesterase (EC 3.1.1.11)	Os04g0438400	Oryza sativa subsp. japonica (Rice)	cell wall modification [GO:0042545]; pectin catabolic process [GO:0045490]		aspartyl esterase activity [GO:0045330]; pectinesterase activity [GO:0030599]	EFLALFR	0.97757	-21.819	0	0	0	0	0	0	0	0	0	0	0	0	0	0	0	0	0	0	0	0	0	0	0	10.3273	0	0	0
A0A0P0WAH0	A0A0P0WAH0_ORYSJ	Os04g0433300 protein	Os04g0433300 OSNPB_040433300	Oryza sativa subsp. japonica (Rice)				GHRDLSTR	0.9704	-1.8804	0	0	0	0	0	0	0	0	0	0	0	0	0	0	0	0	0	0	0	0	0	0	0	0	0	9.86834	0
A0A0P0WAI0	A0A0P0WAI0_ORYSJ	Os04g0440000 protein	Os04g0440000 OSNPB_040440000	Oryza sativa subsp. japonica (Rice)	regulation of alternative mRNA splicing, via spliceosome [GO:0000381]			YIAALKEKAEQR	0.97328	-3.4819	0	0	0	0	0	0	0	0	0	0	0	0	0	0	0	0	0	0	0	12.8653	0	0	0	0	0	0	0
A0A0P0WAJ9	A0A0P0WAJ9_ORYSJ	Os04g0433600 protein	Os04g0433600 OSNPB_040433600	Oryza sativa subsp. japonica (Rice)	positive regulation of growth [GO:0045927]			FCLRRLPK	0.98682	-1.7021	0	0	0	0	0	0	0	0	0	0	0	0	0	0	0	0	10.8625	0	0	0	0	0	0	0	0	0	0
A0A0P0WAK4	A0A0P0WAK4_ORYSJ	Os04g0425100 protein	Os04g0425100 OSNPB_040425100	Oryza sativa subsp. japonica (Rice)			metal ion binding [GO:0046872]	KDGNVYKR	0.9846	-11.518	0	0	0	0	0	0	0	0	0	0	0	0	0	10.7388	0	0	0	0	0	0	0	0	0	0	0	0	0
A0A0P0WAQ4	A0A0P0WAQ4_ORYSJ	Os04g0448401 protein	Os04g0448401 OSNPB_040448401	Oryza sativa subsp. japonica (Rice)			nucleic acid binding [GO:0003676]; RNA-DNA hybrid ribonuclease activity [GO:0004523]	IIALLWKWWDER	0.97952	-7.7702	0	0	0	0	0	0	0	0	0	0	0	0	0	8.96278	0	0	0	0	0	0	0	0	0	0	0	0	0
A0A0P0WAS9	A0A0P0WAS9_ORYSJ	Os04g0451200 protein	Os04g0451200 OSNPB_040451200	Oryza sativa subsp. japonica (Rice)			UDP-glycosyltransferase activity [GO:0008194]	GSPLDALGSNLWK	0.98549	-13.018	0	0	0	0	0	0	0	0	0	0	0	0	0	0	0	0	0	0	0	0	0	0	0	10.1439	0	0	0
A0A0P0WAT4	A0A0P0WAT4_ORYSJ	Os04g0452650 protein	Os04g0452650 OSNPB_040452650	Oryza sativa subsp. japonica (Rice)				GRHLGEVQR	0.98066	-16.375	0	0	0	0	0	0	0	0	0	0	0	0	0	0	0	0	0	0	11.2855	0	0	11.8319	0	11.6502	0	0	0
A0A0P0WAU5	A0A0P0WAU5_ORYSJ	Os04g0448550 protein	Os04g0448550 OSNPB_040448550	Oryza sativa subsp. japonica (Rice)				HRSRPRLDPVPR	0.96279	-1.6736	0	0	0	15.1373	0	0	0	0	0	0	0	0	0	0	0	0	0	10.5036	8.46197	0	0	0	15.3834	0	0	0	15.0063
A0A0P0WAU7	A0A0P0WAU7_ORYSJ	Os04g0450825 protein	Os04g0450825 OSNPB_040450825	Oryza sativa subsp. japonica (Rice)				MALETKISLK	0.98001	-6.8113	0	11.2015	0	0	0	0	0	0	0	0	0	0	0	0	0	0	0	0	0	0	0	0	0	0	0	0	0
A0A0P0WAV5	A0A0P0WAV5_ORYSJ	Os04g0446401 protein	Os04g0446401 OSNPB_040446401	Oryza sativa subsp. japonica (Rice)		membrane [GO:0016020]		HPVPPPPSSRPR	0.98502	-11.505	0	0	0	0	0	0	0	0	0	0	0	0	0	0	0	0	0	0	0	9.40069	0	0	0	0	0	0	0
A0A0P0WAW7	A0A0P0WAW7_ORYSJ	Os04g0453233 protein	Os04g0453233 OSNPB_040453233	Oryza sativa subsp. japonica (Rice)				AGAVVVAAQDEAAGRVR	0.98125	-10.57	0	0	0	0	0	0	0	0	0	0	0	0	0	0	0	0	0	0	0	13.4579	0	0	0	0	0	0	0
A0A0P0WAW9	A0A0P0WAW9_ORYSJ	Os04g0443400 protein	Os04g0443400 OSNPB_040443400	Oryza sativa subsp. japonica (Rice)				HRRPPVVYPLREPR	0.97832	-17.856	0	0	0	0	0	0	0	0	0	0	0	0	0	0	0	0	0	0	11.4104	0	0	0	0	0	0	0	0
A0A0P0WB01	A0A0P0WB01_ORYSJ	Os04g0456900 protein	Os04g0456900 OSNPB_040456900	Oryza sativa subsp. japonica (Rice)	ethylene-activated signaling pathway [GO:0009873]	nucleus [GO:0005634]	DNA binding [GO:0003677]; DNA-binding transcription factor activity [GO:0003700]	QNTMVISNLEERMR	0.98594	-10.086	0	0	0	0	0	0	0	0	0	0	0	0	0	0	0	0	0	0	0	0	0	0	0	0	0	0	9.982
A0A0P0WB28	A0A0P0WB28_ORYSJ	Os04g0462801 protein	Os04g0462801 OSNPB_040462801	Oryza sativa subsp. japonica (Rice)				GPRLYAAMGEER	0.98688	-9.4717	0	0	0	0	0	11.6238	0	0	0	10.9626	0	0	0	0	0	0	0	0	0	0	0	0	0	0	0	0	0
A0A0P0WB38	A0A0P0WB38_ORYSJ	Os04g0450150 protein	Os04g0450150 OSNPB_040450150	Oryza sativa subsp. japonica (Rice)				TSWHERRR	0.98563	-1.7021	0	11.1653	0	0	0	0	0	0	0	11.0119	0	0	0	0	0	0	0	0	0	10.4371	0	0	0	0	0	0	0
A0A0P0WB50	A0A0P0WB50_ORYSJ	Os04g0464800 protein	Os04g0464800 OSNPB_040464800	Oryza sativa subsp. japonica (Rice)	Group I intron splicing [GO:0000372]; Group II intron splicing [GO:0000373]	chloroplast [GO:0009507]; plastid stroma [GO:0009532]	mRNA binding [GO:0003729]	SALRRISDK	0.97207	-2.4684	0	0	10.1708	0	0	0	0	0	0	0	0	0	0	0	0	0	0	0	0	0	0	0	0	0	0	0	0
A0A0P0WB51	A0A0P0WB51_ORYSJ	Os04g0453450 protein	Os04g0453450 OSNPB_040453450	Oryza sativa subsp. japonica (Rice)				EAGDEPAAPPR	0.97783	-18.528	0	0	0	0	10.5621	0	0	0	0	0	0	0	0	0	0	0	0	0	0	0	0	0	0	0	9.93899	0	0
A0A0P0WB52	A0A0P0WB52_ORYSJ	Os04g0458250 protein	Os04g0458250 OSNPB_040458250	Oryza sativa subsp. japonica (Rice)				QIQSLSMSAFLKLPPR	0.98303	-10.686	0	0	0	0	0	0	0	0	0	0	0	0	0	0	0	0	10.6431	0	0	0	0	0	10.6479	0	0	0	0
A0A0P0WB70	A0A0P0WB70_ORYSJ	Os04g0453050 protein	Os04g0453050 OSNPB_040453050	Oryza sativa subsp. japonica (Rice)				VRVVMSATAVGGAVRGR	0.9807	-6.5162	9.72125	0	0	0	0	0	0	0	0	0	0	0	0	0	0	0	0	0	0	0	0	0	0	0	0	0	0
A0A0P0WB71	A0A0P0WB71_ORYSJ	Os04g0450850 protein	Os04g0450850 OSNPB_040450850	Oryza sativa subsp. japonica (Rice)				VHNTRPSVNSAK	0.9775	-1.6736	0	0	0	0	0	0	0	0	0	0	0	0	0	0	0	0	0	0	0	0	0	0	0	0	0	0	0
A0A0P0WB79	A0A0P0WB79_ORYSJ	Os04g0471000 protein	Os04g0471000 OSNPB_040471000	Oryza sativa subsp. japonica (Rice)			DNA-binding transcription factor activity [GO:0003700]	KHKGAAR	0.98587	-11.789	0	15.7862	0	0	0	0	0	15.7155	10.239	0	0	0	0	0	0	0	0	0	0	0	0	0	0	16.6602	0	0	0
A0A0P0WB85	A0A0P0WB85_ORYSJ	Os04g0455200 protein	Os04g0455200 OSNPB_040455200	Oryza sativa subsp. japonica (Rice)		membrane [GO:0016020]	carbohydrate transmembrane transporter activity [GO:0015144]	NPPEIALFRAADR	0.98293	-10.985	0	0	9.92313	0	0	0	0	0	0	0	0	0	0	0	0	0	0	0	0	0	0	0	0	0	0	0	0
A0A0P0WB87	A0A0P0WB87_ORYSJ	Os04g0467950 protein	Os04g0467950 OSNPB_040467950	Oryza sativa subsp. japonica (Rice)				QRPTTMKEIIIR	0.97516	-3.4818	0	0	0	0	0	0	0	0	0	13.6484	0	0	0	0	0	0	0	0	0	0	0	0	0	0	0	0	0
A0A0P0WBB2	A0A0P0WBB2_ORYSJ	Os04g0465750 protein	Os04g0465750 OSNPB_040465750	Oryza sativa subsp. japonica (Rice)				VLFLPGAQQPAPR	0.97665	-3.5809	0	0	0	0	0	0	0	0	0	0	0	0	0	0	0	0	0	0	0	0	0	0	0	0	0	0	0
A0A0P0WBG4	A0A0P0WBG4_ORYSJ	Os04g0461100 protein	Os04g0461100 OSNPB_040461100	Oryza sativa subsp. japonica (Rice)	translation [GO:0006412]	ribonucleoprotein complex [GO:1990904]; ribosome [GO:0005840]	structural constituent of ribosome [GO:0003735]	KDAWEELRAK	0.97407	-3.2085	0	0	0	0	0	0	0	0	0	0	0	0	0	0	0	0	0	0	0	0	0	9.88617	0	0	0	0	0
A0A0P0WBG7	A0A0P0WBG7_ORYSJ	Os04g0472366 protein	Os04g0472366 OSNPB_040472366	Oryza sativa subsp. japonica (Rice)				MWGVLSLFRRR	0.97308	-5.0138	0	0	0	0	0	14.1599	0	0	0	0	0	0	0	0	0	0	0	0	0	0	0	0	0	0	0	0	0
A0A0P0WBK1	A0A0P0WBK1_ORYSJ	4-coumarate--CoA ligase (EC 6.2.1.12)	Os04g0473900 OSNPB_040473900	Oryza sativa subsp. japonica (Rice)	lipid biosynthetic process [GO:0008610]; phenylpropanoid metabolic process [GO:0009698]; response to oxidative stress [GO:0006979]	membrane [GO:0016020]	4-coumarate-CoA ligase activity [GO:0016207]; catalase activity [GO:0004096]; heme binding [GO:0020037]; phosphopantetheine binding [GO:0031177]; trans-cinnamate-CoA ligase activity [GO:0106290]	HGLNREWRLER	0.98088	-7.7911	0	15.4486	0	0	0	15.4954	0	0	15.4746	15.1379	0	0	0	0	0	0	0	0	9.69678	0	0	0	0	0	0	0	0
A0A0P0WBM3	A0A0P0WBM3_ORYSJ	Os04g0470650 protein	Os04g0470650 OSNPB_040470650	Oryza sativa subsp. japonica (Rice)				LRRDHRPP	0.97323	-1.8804	0	0	0	0	0	0	0	0	0	0	0	0	0	0	0	0	0	0	0	0	0	0	0	0	0	0	0
A0A0P0WBQ2	A0A0P0WBQ2_ORYSJ	Os04g0467901 protein	Os04g0467901 OSNPB_040467901	Oryza sativa subsp. japonica (Rice)	microtubule-based movement [GO:0007018]	microtubule [GO:0005874]	ATP binding [GO:0005524]; microtubule binding [GO:0008017]; microtubule motor activity [GO:0003777]	DLLMVDGANKRYPFGCK	0.98158	-10.57	0	0	0	0	0	0	0	0	0	0	0	0	0	0	0	0	11.9859	0	0	0	0	0	0	0	0	0	0
A0A0P0WBQ8	A0A0P0WBQ8_ORYSJ	Os04g0488700 protein	Os04g0488700 OSNPB_040488700	Oryza sativa subsp. japonica (Rice)	protein phosphorylation [GO:0006468]		ATP binding [GO:0005524]; protein serine/threonine kinase activity [GO:0004674]	VLSKQPELVGEKTPLR	0.97331	-2.1111	0	0	0	0	0	0	0	0	0	0	0	0	0	0	0	0	0	0	10.7872	0	11.9476	0	0	0	11.3528	0	0
A0A0P0WBQ9	A0A0P0WBQ9_ORYSJ	Os04g0483900 protein	Os04g0483900 OSNPB_040483900	Oryza sativa subsp. japonica (Rice)				RYGQVVR	0.98607	-10.086	0	0	0	0	0	0	0	0	13.6258	0	0	0	0	0	0	12.1051	0	0	0	0	0	0	0	0	0	0	0
A0A0P0WBS8	A0A0P0WBS8_ORYSJ	Os04g0480801 protein	Os04g0480801 OSNPB_040480801	Oryza sativa subsp. japonica (Rice)				GGARARTAPRPGPR	0.97747	-21.767	0	0	0	0	0	0	0	0	0	0	0	0	0	0	0	0	0	0	0	0	0	0	0	0	0	0	0
A0A0P0WC00	A0A0P0WC00_ORYSJ	Os04g0495800 protein	Os04g0495800 OSNPB_040495800	Oryza sativa subsp. japonica (Rice)		nucleus [GO:0005634]	DNA binding [GO:0003677]; DNA-binding transcription factor activity [GO:0003700]	FAFTEILDVLR	0.98167	-10.608	0	0	0	0	14.7739	0	0	0	0	0	0	0	0	0	0	0	0	0	17.3594	0	0	17.6003	0	0	0	0	0
A0A0P0WC02	A0A0P0WC02_ORYSJ	Os04g0501600 protein	Os04g0501600 OSNPB_040501600	Oryza sativa subsp. japonica (Rice)	DNA metabolic process [GO:0006259]; mitotic sister chromatid cohesion [GO:0007064]	nucleus [GO:0005634]		CYEKLKPVFTPLLR	0.97682	-49.444	0	0	10.7855	0	0	0	0	0	0	0	0	0	0	0	0	0	0	0	0	0	0	0	0	0	0	0	15.5081
A0A0P0WC43	A0A0P0WC43_ORYSJ	Os04g0503600 protein	Os04g0503600 OSNPB_040503600	Oryza sativa subsp. japonica (Rice)	protein autophosphorylation [GO:0046777]	plasma membrane [GO:0005886]	ATP binding [GO:0005524]; protein kinase activity [GO:0004672]	AKMVGFIFYFYFFNKK	0.98238	-10.174	0	0	0	11.0647	0	9.52144	0	0	0	0	0	0	0	0	0	0	0	0	0	0	0	0	0	0	0	0	0
A0A0P0WC60	A0A0P0WC60_ORYSJ	Os04g0505132 protein	Os04g0505132 OSNPB_040505132	Oryza sativa subsp. japonica (Rice)				VAREAAPR	0.98678	-1.7021	0	0	0	0	0	0	0	0	0	0	0	0	0	0	0	0	10.2733	0	0	0	0	0	0	0	0	0	0
A0A0P0WC62	A0A0P0WC62_ORYSJ	Os04g0503100 protein	Os04g0503100 OSNPB_040503100	Oryza sativa subsp. japonica (Rice)				KKPSRGR	1.0824	-0.00052908	0	13.2235	13.4385	0	0	0	0	13.0827	13.2307	12.8145	13.003	12.785	12.5276	0	0	13.9376	13.9854	14.0274	13.8162	0	14.4444	14.2194	14.2468	0	13.4362	0	13.3838
A0A0P0WC64	A0A0P0WC64_ORYSJ	dolichyl-P-Glc:Glc2Man9GlcNAc2-PP-dolichol alpha-1,2-glucosyltransferase (EC 2.4.1.256)	Os04g0503700 OSNPB_040503700	Oryza sativa subsp. japonica (Rice)	dolichol-linked oligosaccharide biosynthetic process [GO:0006488]	membrane [GO:0016020]	dolichyl pyrophosphate Glc2Man9GlcNAc2 alpha-1,2-glucosyltransferase activity [GO:0106073]	HYTFYIWR	0.97567	-3.735	0	0	9.24372	0	0	0	0	0	0	0	0	0	0	0	0	0	0	0	0	0	0	0	0	0	0	0	0
A0A0P0WC67	A0A0P0WC67_ORYSJ	Os04g0498650 protein	Os04g0498650 OSNPB_040498650	Oryza sativa subsp. japonica (Rice)				FGRPNSNR	0.97578	-3.735	0	0	0	0	0	0	0	0	0	0	0	0	0	0	0	0	0	0	0	0	0	0	0	0	0	0	0
A0A0P0WC69	A0A0P0WC69_ORYSJ	Os04g0507016 protein	Os04g0507016 OSNPB_040507016	Oryza sativa subsp. japonica (Rice)				AAGGWRR	1.082	-0.00052908	0	0	0	0	0	0	0	0	0	0	0	0	0	0	0	0	0	0	0	0	0	0	0	0	0	0	0
A0A0P0WC87	A0A0P0WC87_ORYSJ	Os04g0501100 protein	Os04g0501100 OSNPB_040501100	Oryza sativa subsp. japonica (Rice)		membrane [GO:0016020]	magnesium ion transmembrane transporter activity [GO:0015095]	IRCIITADEALILR	0.97769	-19.849	0	0	0	0	0	0	0	0	0	0	0	0	0	0	0	0	0	0	0	0	0	0	0	0	0	0	0
A0A0P0WCA6	A0A0P0WCA6_ORYSJ	Os04g0507450 protein	Os04g0507450 OSNPB_040507450	Oryza sativa subsp. japonica (Rice)				APGPEAR	1.0799	-0.00052908	0	0	0	0	0	0	0	0	0	0	0	0	0	0	8.55961	0	0	0	0	0	0	0	0	0	0	0	0
A0A0P0WCC5	A0A0P0WCC5_ORYSJ	Os04g0507250 protein	Os04g0507250 OSNPB_040507250	Oryza sativa subsp. japonica (Rice)				MQPNPIR	0.97139	-2.0335	0	0	0	0	0	0	0	0	0	0	0	0	14.8091	0	0	0	0	0	14.4234	0	0	0	0	0	0	0	0
A0A0P0WCC6	A0A0P0WCC6_ORYSJ	Os04g0513301 protein	Os04g0513301 OSNPB_040513301	Oryza sativa subsp. japonica (Rice)	cell wall modification [GO:0042545]; pectin catabolic process [GO:0045490]		aspartyl esterase activity [GO:0045330]; pectinesterase activity [GO:0030599]; pectinesterase inhibitor activity [GO:0046910]	GIRCRADTER	0.98032	-6.8113	0	0	0	0	0	0	0	0	0	0	0	0	0	0	0	0	0	0	0	0	0	0	0	0	0	0	0
A0A0P0WCE5	A0A0P0WCE5_ORYSJ	Os04g0516100 protein	Os04g0516100 OSNPB_040516100	Oryza sativa subsp. japonica (Rice)				CPIVVKSAGNK	0.98064	-8.0623	0	0	0	0	0	0	0	0	0	0	0	0	0	0	0	0	0	0	0	0	0	0	0	0	0	0	0
A0A0P0WCG4	A0A0P0WCG4_ORYSJ	Os04g0503200 protein	Os04g0503200 OSNPB_040503200	Oryza sativa subsp. japonica (Rice)				LKTMVCQLRR	0.98111	-6.8113	0	0	0	0	0	0	0	0	0	0	0	0	0	0	0	0	0	0	0	0	0	0	0	0	0	0	0
A0A0P0WCI3	A0A0P0WCI3_ORYSJ	Os04g0514700 protein	Os04g0514700 OSNPB_040514700	Oryza sativa subsp. japonica (Rice)				AVCQQWRRAER	0.97895	-17.534	0	0	0	0	0	0	0	0	0	0	0	0	0	0	0	0	11.6902	0	0	13.5922	0	0	0	0	0	0	0
A0A0P0WCI7	A0A0P0WCI7_ORYSJ	Os04g0520900 protein	Os04g0520900 OSNPB_040520900	Oryza sativa subsp. japonica (Rice)				VGKHHTYDHIARRPK	0.97596	-1.2683	0	0	0	0	0	0	0	0	0	0	0	0	0	0	0	0	0	0	0	0	0	0	0	8.76553	0	0	0
A0A0P0WCL5	A0A0P0WCL5_ORYSJ	Os04g0519100 protein	Os04g0519100 OSNPB_040519100	Oryza sativa subsp. japonica (Rice)		membrane [GO:0016020]		LLLGWKTSYLQQQK	0.98639	-10.086	0	0	0	0	0	0	0	0	0	0	0	0	0	0	0	0	0	0	0	0	0	0	0	0	0	0	0
A0A0P0WCN9	A0A0P0WCN9_ORYSJ	Os04g0529100 protein	Os04g0529100	Oryza sativa subsp. japonica (Rice)		nucleus [GO:0005634]	DNA binding [GO:0003677]; DNA-binding transcription factor activity [GO:0003700]	VPPPPQKLYR	0.98085	-6.8113	0	0	0	0	0	0	0	0	0	0	0	0	0	0	0	0	0	0	0	0	0	0	0	0	0	0	0
A0A0P0WCP5	A0A0P0WCP5_ORYSJ	Os04g0531750 protein	Os04g0531750 OSNPB_040531750	Oryza sativa subsp. japonica (Rice)				FKYRCLTACGQNR	0.98315	-15.428	0	14.2838	0	0	0	0	0	0	0	0	0	0	0	0	0	0	0	0	0	0	0	0	0	0	0	0	0
A0A0P0WCT4	A0A0P0WCT4_ORYSJ	Os04g0528300 protein	Os04g0528300 OSNPB_040528300	Oryza sativa subsp. japonica (Rice)		membrane [GO:0016020]	ABC-type transporter activity [GO:0140359]; ATP binding [GO:0005524]	VSIALELLMRPR	0.98426	-11.505	0	0	0	0	0	0	0	0	0	0	0	0	0	0	0	0	0	0	0	0	0	0	0	0	0	0	0
A0A0P0WCU3	A0A0P0WCU3_ORYSJ	Os04g0533200 protein	Os04g0533200 OSNPB_040533200	Oryza sativa subsp. japonica (Rice)				QLAPAPQAR	0.97696	-4.5014	0	0	0	0	10.3025	0	0	0	0	0	0	0	0	0	0	0	0	0	0	0	0	0	0	0	0	0	0
A0A0P0WCX2	A0A0P0WCX2_ORYSJ	Os04g0521001 protein	Os04g0521001 OSNPB_040521001	Oryza sativa subsp. japonica (Rice)				PCLVLVVDHR	0.9842	-8.8442	0	0	0	0	0	0	0	0	0	0	0	0	0	0	0	0	0	0	0	0	0	0	0	0	0	0	0
A0A0P0WCZ9	A0A0P0WCZ9_ORYSJ	Os04g0523974 protein	Os04g0523974 OSNPB_040523974	Oryza sativa subsp. japonica (Rice)		membrane [GO:0016020]		VIPIRYR	0.97112	-5.0616	0	0	0	0	0	0	0	0	0	0	0	0	0	0	0	0	0	0	0	0	0	0	0	0	0	0	0
A0A0P0WD12	A0A0P0WD12_ORYSJ	Os04g0535600 protein	Os04g0535600 OSNPB_040535600	Oryza sativa subsp. japonica (Rice)	carbohydrate metabolic process [GO:0005975]	extracellular region [GO:0005576]; membrane [GO:0016020]; vacuole [GO:0005773]	beta-fructofuranosidase activity [GO:0004564]	STTPALR	0.97512	-3.6711	0	0	0	0	0	0	0	0	0	0	10.3497	0	0	0	0	0	0	0	0	0	0	0	0	0	0	0	0
A0A0P0WD25	A0A0P0WD25_ORYSJ	Os04g0528700 protein	Os04g0528700 OSNPB_040528700	Oryza sativa subsp. japonica (Rice)				WWTWHRR	1.0875	-0.00052908	0	0	14.2649	0	0	0	0	0	0	0	0	0	0	0	0	0	0	0	0	0	0	0	0	0	0	0	0
A0A0P0WD40	A0A0P0WD40_ORYSJ	Os04g0529500 protein	Os04g0529500 OSNPB_040529500	Oryza sativa subsp. japonica (Rice)	dephosphorylation of RNA polymerase II C-terminal domain [GO:0070940]		RNA polymerase II CTD heptapeptide repeat phosphatase activity [GO:0008420]	TELMHFR	0.97087	-2.0335	0	0	0	0	0	9.74923	0	0	0	0	0	0	0	0	0	0	0	0	0	0	0	0	0	0	0	11.2086	0
A0A0P0WD45	A0A0P0WD45_ORYSJ	Os04g0546550 protein	Os04g0546550 OSNPB_040546550	Oryza sativa subsp. japonica (Rice)				EALEVAEFGRAR	0.97948	-7.7702	0	0	0	0	0	0	0	0	0	0	0	0	0	0	0	0	0	0	0	0	0	0	0	0	0	0	0
A0A0P0WDA3	A0A0P0WDA3_ORYSJ	Os04g0545250 protein	Os04g0545250 OSNPB_040545250	Oryza sativa subsp. japonica (Rice)				GPTDHGR	0.98176	-10.547	0	0	10.8684	0	0	0	8.68141	0	0	0	0	10.3485	0	0	0	0	13.5046	0	0	0	0	0	0	0	0	12.0492	0
A0A0P0WDC8	A0A0P0WDC8_ORYSJ	Os04g0557300 protein	Os04g0557300 OSNPB_040557300	Oryza sativa subsp. japonica (Rice)				LCAAAAEAER	0.97763	-20.568	0	0	0	0	0	0	0	0	0	0	0	0	0	0	0	0	0	0	0	0	0	0	0	0	0	0	0
A0A0P0WDF1	A0A0P0WDF1_ORYSJ	Os04g0563801 protein	Os04g0563801 OSNPB_040563801	Oryza sativa subsp. japonica (Rice)	sterol transport [GO:0015918]	membrane [GO:0016020]	sterol binding [GO:0032934]	TYHTPLNK	0.97558	-3.735	10.4924	0	0	0	0	0	0	0	0	0	0	0	0	0	0	0	0	0	0	0	0	0	0	0	0	0	0
A0A0P0WDI9	A0A0P0WDI9_ORYSJ	Os04g0565750 protein	Os04g0565750 OSNPB_040565750	Oryza sativa subsp. japonica (Rice)				LLFSDAPAISPLSSR	0.98412	-10.701	0	0	0	0	0	0	0	0	0	0	0	0	0	0	0	0	0	0	0	0	0	0	0	0	0	0	0
A0A0P0WDJ0	A0A0P0WDJ0_ORYSJ	Os04g0555350 protein	Os04g0555350 OSNPB_040555350	Oryza sativa subsp. japonica (Rice)				GFPVAFKSQRLQPYR	0.98414	-12.402	0	0	0	0	0	0	0	0	0	0	0	0	0	0	0	0	0	0	0	0	0	0	0	0	0	0	0
A0A0P0WDL8	A0A0P0WDL8_ORYSJ	Os04g0567350 protein	Os04g0567350 OSNPB_040567350	Oryza sativa subsp. japonica (Rice)				EQLHGVHQLLRR	0.98003	-17.054	0	0	0	0	0	0	0	15.729	11.9221	0	0	0	0	0	15.3813	0	0	0	0	0	0	0	0	0	0	0	0
A0A0P0WDN0	A0A0P0WDN0_ORYSJ	Os04g0570850 protein	Os04g0570850 OSNPB_040570850	Oryza sativa subsp. japonica (Rice)				EPQRALDVLARR	0.97824	-1.6741	0	0	0	0	0	0	0	0	0	0	0	0	0	0	0	0	0	0	0	0	0	0	0	0	0	0	0
A0A0P0WDP9	A0A0P0WDP9_ORYSJ	O-fucosyltransferase family protein	Os04g0563000 OSNPB_040563000	Oryza sativa subsp. japonica (Rice)	fucose metabolic process [GO:0006004]		transferase activity [GO:0016740]	HVVQLTKFDYRVSNR	0.9842	-12.402	0	0	0	0	0	0	0	0	0	0	0	0	0	0	0	0	0	0	0	0	0	0	0	9.14962	0	0	0
A0A0P0WDQ8	A0A0P0WDQ8_ORYSJ	Os04g0573200 protein	Os04g0573200 OSNPB_040573200	Oryza sativa subsp. japonica (Rice)				RLSLDKLDGLASPLHAAK	0.98168	-10.393	0	0	0	0	0	0	0	0	0	0	0	0	0	0	0	0	0	0	0	0	0	0	0	0	0	0	0
A0A0P0WDR1	A0A0P0WDR1_ORYSJ	Os04g0576250 protein	Os04g0576250 OSNPB_040576250	Oryza sativa subsp. japonica (Rice)				RSCRWVSHGLR	0.9777	-6.3608	0	0	0	0	0	0	0	0	0	0	0	0	0	0	0	0	14.5603	0	0	0	0	0	0	0	0	0	0
A0A0P0WDT7	A0A0P0WDT7_ORYSJ	Os04g0570250 protein	Os04g0570250 OSNPB_040570250	Oryza sativa subsp. japonica (Rice)				KPSKIWAGGGHGIRTPR	0.98426	-12.761	0	0	0	0	0	0	0	0	0	0	0	0	0	0	0	0	0	0	0	0	0	0	0	0	0	0	8.28021
A0A0P0WDV1	A0A0P0WDV1_ORYSJ	Os04g0562500 protein	Os04g0562500 OSNPB_040562500	Oryza sativa subsp. japonica (Rice)	root development [GO:0048364]; shoot system development [GO:0048367]			RPVRAPCK	0.97622	-4.644	0	0	0	0	0	0	14.1246	0	0	0	0	0	0	0	0	0	0	11.4318	0	0	0	0	0	0	0	0	0
A0A0P0WDY1	A0A0P0WDY1_ORYSJ	Os04g0582700 protein	Os04g0582700 OSNPB_040582700	Oryza sativa subsp. japonica (Rice)			helicase activity [GO:0004386]; RNA binding [GO:0003723]	EDLDELGRSRK	0.98042	-8.0623	0	0	0	0	0	0	0	0	0	0	0	0	0	0	0	0	0	0	0	0	0	0	0	0	0	0	0
A0A0P0WE42	A0A0P0WE42_ORYSJ	Os04g0590001 protein	Os04g0590001 OSNPB_040590001	Oryza sativa subsp. japonica (Rice)				MLWLVRSSR	0.966	-2.4684	0	0	0	0	0	0	0	0	0	0	0	0	0	0	0	0	0	0	0	0	0	0	0	0	0	0	0
A0A0P0WE46	A0A0P0WE46_ORYSJ	Os04g0576200 protein	Os04g0576200 OSNPB_040576200	Oryza sativa subsp. japonica (Rice)				VAGYGGRRQR	0.97767	-6.8113	0	0	0	0	0	0	0	0	0	0	0	0	0	0	0	0	0	0	0	0	0	0	0	0	0	0	11.2081
A0A0P0WE51	A0A0P0WE51_ORYSJ	Os04g0584900 protein	Os04g0584900 OSNPB_040584900	Oryza sativa subsp. japonica (Rice)				SPDNNSQSK	0.97654	-4.5014	0	0	0	0	0	0	0	0	0	0	0	0	0	0	0	0	0	0	0	0	0	0	0	0	0	0	10.5201
A0A0P0WE58	A0A0P0WE58_ORYSJ	Os04g0591401 protein	Os04g0591401 OSNPB_040591401	Oryza sativa subsp. japonica (Rice)				RAVVDLAR	0.97211	-1.7021	0	0	0	0	0	0	0	0	0	0	0	0	0	0	0	0	0	0	15.2257	0	0	0	0	0	0	0	0
A0A0P0WE65	A0A0P0WE65_ORYSJ	Os04g0583266 protein	Os04g0583266 OSNPB_040583266	Oryza sativa subsp. japonica (Rice)				DAALALPQSGR	0.97762	-18.358	0	0	0	0	0	0	0	0	0	0	0	0	0	0	0	0	0	0	0	0	0	0	0	0	0	0	0
A0A0P0WE96	A0A0P0WE96_ORYSJ	Os04g0582200 protein	Os04g0582200 OSNPB_040582200	Oryza sativa subsp. japonica (Rice)				TSLLWSRASSK	0.97123	-3.1203	0	0	0	0	0	0	0	0	0	0	0	0	0	0	0	0	0	0	0	0	0	0	0	0	0	0	0
A0A0P0WE98	A0A0P0WE98_ORYSJ	Os04g0599650 protein	Os04g0599650 OSNPB_040599650	Oryza sativa subsp. japonica (Rice)			ATP binding [GO:0005524]; helicase activity [GO:0004386]; hydrolase activity [GO:0016787]	HMMPFVK	0.97506	-34.988	0	0	0	0	0	0	0	0	0	0	0	0	0	0	0	9.2035	0	14.5461	0	0	0	0	0	0	0	0	10.498
A0A0P0WEB4	A0A0P0WEB4_ORYSJ	Os04g0590100 protein	Os04g0590100 OSNPB_040590100	Oryza sativa subsp. japonica (Rice)			metal ion binding [GO:0046872]	GIGFDAEKLR	0.98689	-10.02	0	0	0	0	0	0	0	0	0	0	0	0	0	0	0	0	0	0	0	0	0	0	11.799	0	0	0	0
[truncated: 16,850 more rows]
