# Supplementary material for: Phosphoproteomic insights into the regulation of root length in rice (Oryza sativa L. cv. KDML 105): uncovering key events and pathways involving phosphorylated proteins
Source: PeerJ. 2025 Jul 4;13:e19361. doi: 10.7717/peerj.19361 (PMC12232931; doi:10.7717/peerj.19361)
Supplement: Supplemental Information 3 [file peerj-13-19361-s003.xlsx]

## Sheet: Table S2
Table S2: UniProt IDs of identified phosphoproteins after data preprocessing
UniProt ID
Q8H5D5
Q0D6I4
Q5SN55
Q8L4D3
Q2R0A3
Q69XS9
Q53L90
A0A0P0VG51
Q53Q06
Q8S1Z1
A2ZPU9
Q9FE07
A0A0P0X846
A0A0P0Y245
Q6KA98
B9EZG6
Q6Z972
A0A0N7KQ25
A3BE94
Q6ASZ4
Q60EX3
Q7XDV5
A0A0P0WMK8
A0A0P0WZ28
Q2F922
A0A0P0X9X9
Q0JJ85
Q6ZFM7
Q0JJD2
Q8LHY2
Q6ZHP9
B9EVT5
Q652I8
Q8S5K1
B9FM83
B9EYH0
A0A0P0Y6B0
Q6Z3T7
Q2R2N6
A0A0P0VUJ1
Q10L14
Q84VF9
Q2R465
A0A0P0VFJ1
Q10F48
Q94DL7
Q2QSH5
Q8LM57
Q84M66
Q0D467
Q8W5J0
Q8LQ44
Q6YPE9
A3A5U3
B9FEE4
Q8H991
Q2QM00
Q5TKJ2
Q8GU83
P07730
A0A0P0VCR3
B9G706
Q0D5X2
Q2QNM1
Q851S1
B9F8D8
A0A0N7KRP2
Q2QQW7
B9EXC6
Q2QTF8
B9F5I5
Q6YZL2
Q9FW76
A0A0P0WKA6
A0A0P0UZF8
B9G8J1
Q2QVP2
Q2QTB8
Q6I646
Q5YLZ8
A3AT14
Q75HJ0
Q0JED0
Q6Z5Z9
Q7XDR1
A0A0P0V3S5
Q6ATQ3
A3BNW7
Q6I5U3
Q67W49
Q8H3B9
B9GCH6
A0A0P0Y809
Q7XPD9
C7J4E8
Q5VNU7
B9FMR6
Q5QMW8
Q8S6W4
Q0J6I8
H2KVZ8
A0A0P0WPR5
Q0J970
Q8S780
Q10I17
Q0J1T5
Q10IR6
Q942B3
Q2R7H4
Q6EPY0
Q75KP5
A0A0P0VPB7
A0A0P0VSX9
Q6I613
A3A6I1
Q33BI5
B9F4D9
A3APA1
Q0DL45
A3BIP2
Q8H5X7
Q6ZL03
B9GE60
B9GDD7
A0A0N7KH98
Q8W3E4
Q8GRJ2
Q8LMG2
A0A0P0WAT4
A0A0P0W938
Q2R0U4
Q0JPU3
A0A0P0V908
Q5VPD3
B9FPG0
Q5ZB08
A0A0P0Y551
Q33AZ6
B9G901
Q5ZAU7
Q9LSU0
Q0JCG0
Q7G777
B9FID4
A3CFG7
A0A0N7KCU3
B7EI07
A0A8J8XG24
A0A0P0WBQ8
Q2QR52
Q2QXJ5
Q5JKI0
Q8H8P3
Q6UAL2
A0A0P0Y4D5
Q6ZAD8
Q655H4
Q65X71
A0A0P0Y4Y2
B9FYA0
Q75LM2
A0A0P0WYS9
A0A0N7KLR2
A0A0P0XHL3
B9FLJ1
Q2QP79
A0A0P0XVG3
B9GDP3
Q53K98
Q851Y1
A3AD04
A3BZT8
B9G0E3
A0A0P0XF26
A3BRN0
Q8LJ05
Q337J6
Q8GSZ6
B9G8U4
Q60DU7
Q6YVN1
Q2QM06
Q8S6T7
Q6UUI5
Q5KQG5
A0A0P0UXQ8
Q8H663
Q2QRF1
A2ZZZ5
Q5VMM9
B9FQ32
Q5N7U3
Q69M34
Q10LV1
A0A0N7KRT0
Q10JP7
A3AR84
A3AAC2
A0A0P0Y3S0
Q6Z6E2
A3AA60
Q658I2
B9EUQ0
A0A0P0XDE8
B9F0Z4
D5L9G4
A0A0P0Y1E0
A0A0P0XPC1
Q69JE7
Q2QWQ2
A0A0P0WX48
Q8W5E9
Q6K376
Q5ZAG8
Q53P58
Q6K884
A0A0P0VTT6
Q2RB71
B9F4R2
B9GCT8
A3B9N1
A0A8J8YR34
Q6Z525
B9F4T1
A3AE39
Q2QSR9
Q6ZCF1
Q6AVN0
A0A0P0XQS0
B9G0C0
Q2QNN3
Q2QN43
Q8H467
A3A1I4
B9GAT1
A0A0P0WKN7
Q5VQM5
A3CF36
A0A0P0Y050
Q6YX86
Q6ZFK9
Q69IS7
Q69WZ4
Q0DX33
Q2QRV5
B9EY27
Q53K94
A3BDC1
Q8H851
Q0DEQ5
B9F7Q3
B9G4I8
A0A0P0VSL4
B9F4T5
Q5QMP9
A3AWH8
Q7XSC5
Q2QP86
Q7XU13
Q53NN0
Q2R2A3
Q10A91
Q7XVB6
B9F7T3
Q2R262
B9FFA8
B9F4C1
B9F977
A0A0P0XKY4
Q5U1Q0
Q0D4Q0
Q7XK32
Q93VE4
Q7XLR5
Q10S14
Q7Y046
Q8S2E6
A0A8J8XG49
Q6UUN6
A0A0P0WJH3
Q6EUK2
A3BJ25
Q6UUE1
Q9FW69
Q0J9J6
A3APX7
Q0DUK2
C7J7E9
Q6ZHP7
Q10QC5
Q6YY42
Q2QTK6
Q6EPT3
Q5ZDJ1
A0A0P0Y6U6
Q5TKD9
Q67VY9
Q53P05
A0A0P0VV83
Q2QQA6
A0A0P0VNZ1
Q2QX38
Q6ZD18
B9EX92
Q0J2B1
A0A0P0V0B5
A2ZTK1
Q8SAX1
Q338I8
A0A0P0WJI5
Q8SBB1
C7J198
Q10RL2
Q7F0I1
Q7JAJ0
Q53N56
B9EX01
Q6Z6S1
Q6ZGT3
Q6L4N7
A0A0P0W764
C7J176
B9FDX8
A0A0P0Y7A6
Q6Z524
Q75GX7
Q2QVU1
A0A0P0XG69
C7JA31
Q69NY2
Q7XKA7
Q2R1A7
Q0DJ89
A0A0P0W3X6
Q5VMW1
Q10J35
Q53KB5
B9FWX6
Q6K5S1
Q1EHT8
Q2R2J8
G0KY82
Q6YU40
Q5QME3
Q5N7K0
A0A0P0XXS5
Q8S5U9
C7IZ15
Q6Z0F4
Q53NJ8
C7J019
Q6YTN9
Q7XR14
A0A0N7KTZ7
B9EYZ4
Q688J5
Q10NU3
Q2R6L9
A0A0P0XLN8
A0A0P0WS12
A0A8J8YJZ6
Q69VT1
Q8S3Q6
Q0JB88
B9G749
Q7XT12
Q9ASC8
Q0J2I3
A0A0P0XFL8
Q6ZB03
A0A0P0VHU6
Q10JT7
A0A0P0VRH8
Q7XEI0
C7J351
Q5TKG1
Q0DEM7
Q0J8M1
Q10QE3
A0A0P0XK51
B9FWV1
B9FQI4
B9EXJ8
Q5N9P2
C7J6X8
A0A0P0VX76
Q69Y58
P46466
A0A0P0VH79
Q94JB0
A2ZTQ1
A0A0P0VJ04
A3BD33
Q6H816
Q7XU33
C7J5P6
B9F8K9
Q69K07
Q6L4Y1
Q7XQH1
Q6K5P6
Q7XT59
B9EVS5
Q69TP6
C7IYS6
Q94J75
Q7XSQ2
Q7XRG1
Q2QNF5
B9FES7
Q6K3X3
A0A0N7KCZ1
Q7XXF6
A0A0P0VV85
Q2QNN2
Q5VR53
A3CI79
Q6ETT1
Q5JK27
B9EWM5
Q0E3A6
B9G3Y1
Q6ZLC6
Q2R3R3
B7F8Z2
B9G1G8
Q84ZS0
Q6Z695
Q7XC57
B9FJX5
Q0D3J9
A0A8J8YCL8
B9EY43
B9FKE7
Q94H86
Q67VS7
B9FX02
C7J8T1
Q94LS4
A2ZTB1
Q2QYU9
Q2QTA1
Q69R54
Q6H593
B9FR79
A3A066
Q0JK73
A0A0P0W2X7
Q7XVA7
A0A8J8XSY2
Q6ESS8
Q53N01
Q6ZB05
A0A0P0VX68
Q2QSQ2
B9EX28
B9FCG8
Q6K6R4
A0A0P0XQK8
Q8LQS2
Q8LIU9
B9F907
Q6EPY7
B9ETC3
A0A0P0VJG6
B9EW56
Q84SQ7
E2PSN2
B9FIP8
A0A5S6R6S5
Q7XVF1
Q2QMD9
B7F625
Q7EZC8
Q0J8R8
A0A224QT09
A3AM46
Q6UUR9
Q5ZCX2
Q656E5
A0A0P0X1E0
Q7XIH4
A3BSA7
Q2QXP9
Q8H3F6
A3BGD3
Q6H700
A3CI27
B9FMC9
Q7XN29
Q6Z1A9
Q8S797
Q10AW7
Q10NB2
Q5VMU5
A0A0P0W5T0
Q2QQG9
A0A0P0X5G2
Q5VN83
Q8LHU0
Q0DJT3
Q8LNP5
Q8S7I0
A0A0P0VZ72
Q7XBY6
Q7XIS4
A4K7M3
Q0JA29
Q53MF8
Q6Z201
A0A0P0WPL1
A0A0P0X161
Q0IY07
A3AGU3
A0A0P0VFU2
A2ZXZ3
B9FLR7
A0A0P0XFC5
B9FXI9
A3AKQ3
Q2QYZ3
Q5Z9Z1
Q7F916
Q2QUG3
B7EDF0
Q5NBP9
Q6Z8S0
Q6YZP8
Q6K2H0
Q5W736
A3C0E8
Q5VMZ7
Q75GK0
P49199
B9EX64
A3C132
B9FY07
C7IZJ2
B9F3A5
Q8H055
Q2RAL5
Q6Z632
Q657N6
A3BN52
Q6K3N4
Q69RG7
A0A0P0VD92
Q6ESP2
Q5JMY0
Q2R181
B9ETF0
Q53QG5
Q6F2I4
A3C0D8
A3BR14
Q94I65
A0A0P0VNA7
Q6ZJ47
A0A0P0WJP8
A0A0P0W5Y5
B9FY92
Q94DM2
Q657W5
A3BHB4
Q6H6R9
Q0JGS5
A0A0P0Y8P4
A0A0P0Y5D4
A0A0P0W7M5
Q2QQ33
B9G094
Q2RB69
A0A0N7KR59
A0A0P0VYA6
Q2QSX4
B9G9P2
Q6UUB7
A0A0P0XY36
A2ZWW8
B9FUI3
Q8S7E7
Q84Q43
Q5ZBA5
Q6Z245
Q6ZF85
Q0DCF1
Q7XPK1
Q7XDA8
Q0D423
B9F6Z9
A3AGP9
Q53LL0
B9FN44
B9ETI4
A3BV91
A0A0P0V1X1
A2ZUG6
Q6F2N1
A0A0N7KGW2
A2ZZ21
Q10A37
A0A0P0XWT5
Q5VQH8
Q0D6R8
C7J293
Q2QXA4
B7EY69
A0A0N7KR34
A0A0P0VRM2
A0A8J8XSQ9
A0A0P0XWM1
Q5W6W4
B9FCR5
B9FSI1
Q6K818
A0A0P0Y5K1
B9G7Q7
Q53L44
B9F183
A0A0P0WKB5
Q5N7R6
Q5Z5R8
A0A0P0Y5E2
Q6AVL3
Q6K654
Q10NA8
A3CGD3
Q7XXM7
Q2QT73
Q0JP46
Q2QW39
Q2QNS1
A0A0P0W1A8
Q7XUK2
Q6H4P7
C7IWP1
A0A0P0XHU0
A0A0P0XGE3
B9FXX9
A0A0P0XP56
Q94HQ3
A0A0P0V934
Q6EPL9
Q0DA12
Q94DS8
Q69IK6
Q10M39
B9FFT9
Q2QT84
A3AR49
Q69RG8
A3ADQ4
Q8SBB6
Q5Z4X7
Q67V33
Q5VQG2
A0A0P0XZT3
Q5Z580
Q6Z574
Q8RZK3
Q5WAA3
Q8S7P4
A0A0P0Y582
Q60E76
Q53KZ6
Q6I5K4
Q75HT8
B9G2Z1
Q6F342
Q6ZHZ8
Q10MH2
Q7G647
Q7F0I3
A0A0P0XH16
B7EPT4
Q7XSB8
Q5N9G9
A3AWF2
Q8S0R1
A0A5S6R8F4
Q6ZHL1
A0A0P0XGI2
Q2R3B4
A0A0P0WC43
B9EUR0
Q94GP2
Q6AUT0
A0A0P0VZR1
Q6YXW0
A0A0P0YCC0
Q6ZDE2
B9F420
A0A0P0V8W2
Q69N53
A0A0P0XDX1
B9F3W5
B9F256
A0A0P0YB11
Q2QQH3
Q2QQR5
A0A0P0XMN3
A0A0P0WP39
A7Y955
Q6Z3Y3
Q2QS12
Q8H468
A0A0P0VG19
Q0J1K4
A0A0P0X4Y7
B9GAN4
Q338R7
Q7XUR1
Q2R997
Q7XM01
B9EX77
A0A0N7KM15
A3CCA5
Q8H4T2
Q0D5C4
A0A0P0XBU0
Q6Z2D4
B9FU94
Q0E4F2
Q5VMF5
A3CA04
A0A0N7KSI6
B9FMP3
Q6ZBH8
Q7EZV7
Q8W3L9
B9FED9
B9G7C5
Q0D4D3
Q0ITQ3
A0A0P0WL72
B9FDI4
B9ETU4
A2ZRK0
Q0JE32
A0A0N7KMB7
Q2QNL6
A0A0P0XGT4
Q6K1Y1
A3A1K1
Q6Z244
B9FX44
Q9AY55
A0A0P0Y743
A0A0P0VAC7
Q8H683
Q6K5G8
A3AW02
C7J8I5
Q9AYC5
B9F512
B9EXP0
B9FV56
Q10PF2
B9FV62
B9G8X1
Q851M2
Q0J2S3
Q60DI0
Q8H2Z9
Q5KQE3
Q60D95
Q9FVZ2
A3A575
Q658H5
B9FQH6
Q5NAR2
A0A0P0XWZ0
Q69UH5
A0A0P0W613
B9FAB8
A3BQ57
B9F552
Q6Z2Z4
C7J454
Q75IS4
A0A0P0X8X1
B9F137
Q2QSM2
A0A0N7KM92
Q10PV2
B9G7H5
Q6ZLN8
A0A0P0YAR9
B9GCB6
A0A0P0WF17
Q9AYG2
A0A0P0WWQ9
Q69KD8
A3C3J2
Q7XQN7
A3ARK4
B9ESX2
Q6ZAY0
Q5Z773
A0A0N7KDQ5
Q6Z6B7
Q0JF68
Q6ZFI9
Q6ZG00
Q6K1R1
Q10LG5
A0A0P0XAZ7
B9FET9
Q8H8A2
Q0J9M6
Q10PN4
A0A0P0W6K5
Q75HV1
Q0DGM2
Q7XBS7
Q94E23
Q655G3
A0A0P0XUT8
Q8S6N0
Q7XN64
Q6Z376
Q6ZK72
Q0DWJ9
A3A3C8
Q7XQL0
A0A0P0W314
A0A0P0VY83
Q5Z4T2
Q0JPG8
A0A0P0VPC7
Q9AV51
B9FMA8
A0A0P0UYP3
Q69LS5
A0A0P0WEV6
Q5ZBV9
Q69MW4
Q5ZBP4
B9FKG4
Q60EL2
Q9AUR5
Q6Z2S9
A2ZSR3
B9FN26
Q0DHC5
Q8LRG0
Q0DAM4
Q10NW7
Q0JGB2
Q84QR8
B9G0E6
A3C6Q8
Q5ZDB9
Q8H822
Q8S008
Q8W0H6
Q5KQC3
B9G7P1
B9GEC7
A0A0N7KDK7
B9FC84
Q7XUW8
Q2QN79
Q75K70
Q6Z9T9
Q6ZG40
A0A0P0Y7W9
A0A8J8YKC3
Q5TKF4
B9FA83
Q5NAT2
Q7XW00
A0A0P0WEP5
A0A0P0VQH0
A0A0P0V8R7
Q0DJN2
A0A0N7KKH1
A0A0P0Y4S3
Q7XE22
A0A0P0VDI8
Q8LII7
Q5Z9X7
B9FN43
Q6ZKG8
Q6EPJ4
Q6Z3A7
A3AHY5
Q10F14
A2ZW27
Q5N7Y1
B9FPX1
Q5CAH7
A0A0P0WSV7
A3A8G6
B9G6K8
Q2QNI2
A3BNY8
A0A0P0XJ76
Q2R1D8
Q6ESQ7
A2ZUY3
A3C729
Q5VMF0
A3C339
Q0INZ1
Q7EZU8
Q6YUQ7
A0A0P0WHL8
A0A0P0WRN8
Q2R321
Q7XCS9
Q6EQK9
Q7XE51
A0A0P0X9E8
A0A0N7KF04
B9FRU2
Q5VN10
Q53M03
Q7XV92
Q69WP0
Q8H009
A0A0P0VFX7
P0C497
Q8H2R7
Q5Z417
Q7XVE7
Q7XUA4
A0A0P0Y006
A3BUJ4
A0A0N7KKQ8
Q0IMF3
A0A0P0VJX9
Q6I5P9
Q6K4A3
Q5VNI5
A0A0P0WPH2
A0A0P0X5G7
Q2RB92
Q5VPG4
A0A0P0XQE5
A0A0P0Y6C4
Q6AVG6
Q8L4N4
Q2R031
B9F1S9
A0A0P0W056
Q75LI4
A3BF92
Q2R0G0
Q10GJ4
B9FC31
A3BFK0
A0A0P0VFR9
Q7X7N0
A0A0P0XLR4
Q0D6C0
B9F6L9
Q0IXE8
Q2QTP0
Q33A20
B9G807
Q7XEZ8
A0A0P0XH65
Q5W676
A2ZWS5
Q7X886
Q2QZV1
Q69J58
Q6AT42
Q6AUC3
Q8GTK0
Q5QM81
Q2QSN5
Q6Z9J1
Q0ITA6
A0A0P0Y6B7
A0A0P0XNC0
B9FW55
A0A0P0VGM6
Q69MK1
B9F6R1
Q7G5Z9
Q8H4E2
Q0DFF8
A3AHH3
Q69UM1
Q7XEA2
Q7XRQ1
Q947Y6
Q7X7G2
Q8H554
Q7XMD0
Q69Y36
Q6ZBK6
C7IWJ6
Q2R1K6
Q5ZEL1
Q2QQD4
Q2QQN4
C7J5Z7
Q94GB9
B9EV75
A0A0P0XCK0
B9F5K9
Q2QNS6
B9FC30
Q6F393
Q5JML9
Q5W6X7
Q6K3T2
A0A0P0V567
C7J5D5
Q5ZDW8
Q8H058
A0A0P0X9Y2
Q0JQ64
Q6YW95
Q7F0I5
A0A0N7KKN1
Q2QS53
Q0DE61
A0A0P0WPT8
Q60EQ2
B9G7L0
A0A0P0X5C6
Q2QSP1
Q7XXG4
Q6K4G4
A0A0P0X4P3
Q8LIX0
B7F9W6
B9EUD5
Q0JJE6
Q6ZGQ3
Q2QUT7
A3CBS3
Q8H436
Q7XHN0
Q7XTI8
Q5JKK5
Q5ZB54
Q69XE1
Q53KV5
Q2QV44
B9EYT8
A0A0P0VME2
Q0DES4
A3B9E2
Q84NV7
Q6H706
Q6H5Y3
Q5NBK7
B9FTY0
Q7XIL1
Q7XX07
A0A0P0VB56
Q8S270
A3BCD7
A0A0P0VBK4
A0A0P0VZ15
A0A8J8Y9M7
Q7XU27
Q6Z7G7
B9EVT7
A3A5J9
B9FSF6
Q0JG11
A0A0N7KD85
C7J245
P29620
Q6EQC3
Q5Z9H3
Q7F893
Q33AN9
Q0IQ93
B9G0J8
A0A0N7KGT8
Q7XWB7
Q0JKP0
B9F9Y1
Q0KIW5
C7J8S0
A3AJP9
A3AIW3
Q7Y0V9
B9FX53
Q6ZDW3
B9FRG6
A0A0P0VC60
A0A0P0XZZ7
Q5JMS3
Q5NAN7
A3C8I0
Q2QVF5
A3BZZ9
H9DWG6
Q69LG7
B9FCV5
A3AVY2
Q2R7V1
Q6K2F3
A0A0P0W419
A0A0P0XAS5
A3A6Y9
Q5ZCE4
B9EUN6
A0A0P0VLA3
Q69RP5
Q53M22
Q8SAZ8
Q69M33
Q6L563
Q10N06
Q7XJZ1
Q6K5B4
Q6EUD8
A0A0P0V1Y2
Q60DP6
A3CHI6
Q65X81
Q0DZ09
Q10BA4
Q0DTK1
Q0IW41
Q0E4P8
Q0JPV9
A0A0P0V9I8
Q651K7
Q8RYP6
A3A8X7
Q10D55
Q7F0Z3
Q5QME6
Q6YTE2
A0A0P0W3S7
Q7XML7
C7J5V5
A0A0P0WSB4
Q6K733
Q2QWK4
Q6L535
Q688M4
A0A0P0VGB2
B7F9M9
Q0IUB1
C7J492
B9F473
Q6Z6L6
B9GCP2
Q2QPN0
Q0J0C2
Q8GW02
B9FMD1
Q2R8R3
A0A0P0VZL2
C7IYH5
Q7FA52
Q8H7V4
Q6ZGZ5
A0A0P0V7Y3
Q2R2X7
B9FDA5
B9G9E1
Q2QV37
Q7XU65
B9F4A6
B9FQT0
B9G4D2
Q5N858
A0A0N7KKF1
Q6ER93
Q2QWU4
Q7EY67
B9EU75
A0A0P0WL87
B9G576
A0A0P0V590
Q0JBV6
Q5Z639
A3AUD2
Q6Z3N3
B9F1L7
A0A0P0V6N8
A3BVM0
Q2QUE4
A3BE81
B9FZH7
C7J371
Q0JEP5
B9FA09
Q10ML5
A0A0P0W402
Q69QS7
Q53LL4
Q948D8
Q6K8A0
A0A0P0VWS3
A0A0P0XXX5
Q2QM21
Q6UU70
Q0E051
Q2R561
A0A0P0WHU5
Q2QWY8
A0A0P0XD63
B9F3S4
Q7DNC1
A0A0P0W3S0
B9FTH0
Q654G0
Q10EE5
Q336P5
A3BNA1
B9F1I2
Q6ZD67
Q2QS55
Q108W5
A3A225
Q6EQJ6
B9FYJ3
Q6ZI65
Q8HCR0
B9FG16
Q53LV5
Q7XKA3
Q2RAX6
Q2QS54
A3AQP1
Q339L9
A0A0P0WHF0
Q689G6
B9EVV0
Q5W6L9
A3BMM1
Q8W2R8
A3BDU5
Q67TR8
Q75IY0
A0A0P0XR94
Q7FA32
C7J7A9
A0A0P0VJJ4
A0A0P0VVC5
Q0DRX1
A0A0P0XHJ2
Q5ZBR5
Q6YWL1
B9F1Y9
P93408
Q7XSJ4
Q7F263
B9GC33
A0A0N7KN93
Q0DET4
A0A0P0W6M3
Q6Z754
Q33AX9
Q53JA6
Q852J4
Q5ZAJ8
A3A1S5
A0A0N7KQJ7
Q7XN66
Q0DJY4
Q6Z6B2
Q6Z676
Q2QQJ6
Q8S0R2
A0A0P0WGX9
Q6H4B7
A2ZSY6
Q7XKL7
Q7X6M0
Q10ES2
A0A0P0UZ75
Q67V16
Q5Z814
Q6ZL82
Q6YT89
Q8GU85
Q5Z576
Q0DIL4
C7J713
Q75M32
A3BZ09
C7J6T5
B9F4S2
Q2QXU4
B9F937
Q0DSA9
B9FDD7
B9FB88
Q2R3L7
Q53L75
A3ATB7
A0A0P0WVJ1
Q7Y1H8
Q2QSD3
Q5TKC1
Q2QNR6
Q2R3T4
Q7XUU0
A0A0N7KDK5
Q0JER9
Q5Z8W0
A0A0P0XBB6
Q5ZCG9
Q8GRI7
B9FLE2
A3A0W6
Q2QPJ9
Q6Z878
Q7FA99
Q9AY59
Q8S6L0
Q2QND8
Q2R3N7
B9FDX6
Q7XL81
A0A0N7KKY2
B9GC74
Q7XWV8
Q0JE02
Q10KY0
A0A0P0Y3R4
Q7XP97
Q6F3A2
Q6K5L9
Q5JMX5
B9FBD8
B9FBF5
A0A0N7KFM0
Q69SG6
B9F7M1
A0A0P0WB79
Q4R1K7
C7IZS0
A3A3U6
Q0JNT7
Q5ZED7
B9EYF0
A3BH63
Q8H8L7
Q6YWH1
B9F5B1
Q10JZ3
B9G9W8
Q2QUC2
Q10M21
B9GCB3
Q69XA8
B9G0A3
B9FDF5
Q5NAK4
Q5NB32
B9FBX1
A0A0N7KUE2
A0A0P0W733
Q69M50
B9FSD9
A0A0P0Y3N3
A0A0P0VS41
A0A0P0XW15
Q6YX17
A0A8J8Y089
Q6YZI9
A2ZP87
A0A0P0Y5S9
B9G2A4
A3AHL7
B9FRU5
B9FWS6
B9FQR1
Q2QMU9
Q6ET43
Q0IPA5
Q6UU95
A0A0N7KCI7
Q0D6X6
A0A0P0W2E8
Q5NBM9
B9FJT5
Q6F2S7
Q9LGQ6
A0A0N7KTJ3
C7J3K8
B9EXS3
A0A1L2C1C5
Q7Y155
Q6Z169
Q7Y0B8
A0A8J8YD12
B9GCQ0
A0A0P0WJD7
Q7G524
A0A0N7KMT0
Q5ZCR4
Q2R1S1
Q0DIY5
Q69Q50
B9FU92
A2ZY51
A0A0P0W761
A0A0P0Y1J4
Q69XX6
Q0DEH8
Q8LNU5
Q0DJD5
Q53JB4
Q2QUC1
Q7XII2
C7J0Y6
Q7XQC6
Q8H3K5
A0A0P0X367
A0A0P0XFC3
A0A0N7KEW7
Q6ZL57
A0A0P0Y999
B9EUY1
A0A0P0UYL8
Q6UU33
Q69UU7
B9F7T7
Q2QTY0
Q6AUK3
B9FI27
B9FZA8
A0A0P0Y3K6
Q9AYC0
B9F9D0
Q6YZG3
A0A0P0VP89
Q5ZD78
A3AXC0
Q75GK6
Q53MC8
Q657J3
Q5VQQ3
Q651I0
A0A0P0Y3M2
Q94H80
Q0J0M6
Q94HE6
Q2QWD6
Q0JJ36
Q0JLZ3
A3BL47
Q6H436
Q6F345
A0A0P0WGC2
Q53LI7
A0A0P0WKY0
B9FKE4
Q60DC2
Q7XL26
A0A0P0VQV8
Q5N712
A0A0P0WKR5
Q53JS7
A0A0P0WG47
Q53MN2
A0A0P0W828
Q69T48
A0A0P0WXU8
C7IW64
B9F612
C7J880
B9F0S4
Q2QY20
Q7XPF3
B9GBB4
Q2QRA2
A0A0P0VUH1
A0A0P0Y839
A0A0N7KUC8
Q6YW41
A3A9X4
Q2QVT0
Q851U4
A0A0N7KH75
B9F4V8
Q53PY0
A3BA58
Q0INP8
A3AAL6
B9FI76
Q2R8R7
Q0DL98
A0A0P0XHN9
B9F2Y2
Q6YXI3
Q6K491
B9EYN8
Q94CR7
Q6ZI77
Q6L5B0
Q69TQ7
O49825
Q6ZAC1
Q338T2
Q5VPG8
Q2QXH1
B9FBQ0
A0A0P0X1I2
Q7EYV7
A0A0P0YC96
B9FZC1
C7J7B2
B9FVA1
A0A0P0X2W9
Q7EZL2
B9FXG6
Q6ETK8
Q6YZC0
Q7XIB9
B9FU26
A0A0P0XG48
Q0IR23
Q2QLM4
A3ATX3
Q6K7P0
Q10PV9
B9G507
Q0E4N7
A0A0N7KDI4
Q2RBK1
Q8S5F0
A0A0P0WLY9
Q8H828
Q6ZHH8
Q7XVV2
B9FBG9
Q7Y1M5
Q6UUT3
A2ZWY3
A0A0N7KL44
Q53KZ4
Q2QSN2
B9FZL2
Q65XH0
Q2R2Y3
A0A0P0VU73
C7J7R5
Q6Z684
Q8LNL4
Q7XKK3
Q53N57
Q6ZF73
Q8LME6
A0A0P0WZ69
Q6ZJ60
Q10HF6
Q6EUG5
A0A0P0WBK1
Q655W6
Q7XPJ0
Q53K71
A0A0N7KLF5
Q2QWP5
B9FNF3
A0A0P0UXX6
B9G492
A0A0P0VK96
Q0ITI9
B9FNB1
Q6K848
Q8H7J6
A0A0P0Y4W4
C7IXU9
Q8LNG3
Q7X794
Q5Z8A7
B9F503
Q7XH49
A0A0P0WP82
Q653M6
B9EXR1
Q5VPZ1
B9FKR9
B9G4Q2
Q0IRX0
Q67J00
Q53JL2
A0A0P0V946
Q8LMR2
Q0DLP9
Q6YWH9
A0A0P0WTW6
A0A0P0X248
Q7FAZ3
Q9FE41
A0A0N7KRC4
Q2RBH8
Q2QS63
Q69R93
B7F1B6
B9G4X2
Q67TM3
Q8W2U2
Q2QZU9
Q10RY3
Q6ZDQ2
Q0IPY4
Q7F9S6
Q8H5J2
Q10QE2
A0A0P0V5B3
Q0DS53
B9G5T0
A3BLG5
Q6Z706
A2ZSF9
Q2QN48
A0A0P0VBB9
Q53KK4
B9FZL5
A0A0P0X4C5
Q5JN17
Q10N31
Q2RAK4
B9GE53
Q10PZ1
Q2QNG5
B9EVL4
A0A0P0VII7
Q69XT0
Q2QU28
B9FXY3
Q762B4
Q7XPX9
Q84SR4
B9F6X8
Q5ZBR9
B9FX55
Q53LM4
Q8GSZ2
B9FWZ3
Q94GI9
Q7XS91
A0A0P0VMT1
Q5QLV4
A0A0P0X8Y1
Q0JLY9
A0A0P0WGS3
Q8S6P1
A3AT90
A0A0P0WPQ6
Q5SNL7
Q8L441
Q2QMT7
Q8LMB0
B9FDQ6
Q10T43
Q0E3K6
Q2R4V1
A3BFA8
Q0JHY6
B9FWG8
B9G8S7
B9F2G9
C7J9A5
Q8S7K1
Q5NBC6
B9FQY8
A0A0N7KJ88
Q6ZGJ5
B9EZ80
Q2QWR0
B9G1J5
Q7EY40
Q5Z561
Q5Z4Y4
B9EWK6
A0A0P0Y1C0
B9FSS0
Q84PD7
Q10NZ4
Q2R6K5
B9FZ73
B9FZM7
A0A0P0WQ43
Q2R431
A0A0P0WKB7
A6Y8Q5
Q2QR00
Q7XQ55
B9F3S8
Q8S6Y6
Q2QXB8
Q7FAU6
Q6MWA9
A0A8J8YIN5
A0A0P0W8G3
A0A0P0VM09
B9GAM9
Q8W2S7
Q8GSG1
B9FLC0
A0A0P0WC00
Q7EZU9
B9G187
Q67WW4
B9FUX0
A0A0P0XPB0
A0A0P0YBZ1
Q5SN75
Q650T8
A0A0P0WWK5
Q6YTK8
B9FWY5
A0A0P0X3S2
Q7XX73
Q6EPB8
A0A0P0Y3Q0
A0A0N7KE63
Q7XRI2
B9FZD1
Q10GE7
C7IYK8
A0A0P0XJX1
Q7XPG8
Q2QNJ3
Q2R2H0
Q94CN1
Q7XVW1
A0A0P0W7V4
Q0IQ42
Q69SQ1
B9G6M1
Q5ZD00
Q7XSC6
Q69P58
C7J8C9
Q7XWZ2
A0A0P0VLM9
Q10I88
A0A0P0VWQ5
Q5JQT9
A0A0P0XW90
Q6ATI5
A0A0P0WE98
Q5JLG3
Q75L08
B9G4L7
Q5JLD2
Q6Z0B5
Q6L4L4
Q2R5G8
A0A0P0X271
Q2R213
Q8LNE1
Q5NAM9
A0A0N7KHJ6
Q0DJV3
A3B925
A2ZVF3
A0A0N7KRF3
Q6K824
Q5ZAQ8
A0A0N7KKM9
A3ATH5
Q75LG7
Q5QMR3
A0A0P0VTT8
A0A0P0WP33
B9G388
Q53ND1
Q336U4
Q0DMM3
A0A0P0WEZ0
B9EZS5
Q5JL49
A0A0N7KQ21
Q7F9P3
B9FUX3
Q6ZFM2
Q653D8
B7F9S9
B9GCJ9
Q7XV59
Q653C9
Q10S25
Q2R178
A0A0P0WYH1
Q0J7S9
Q8LQA1
A2ZTW5
B9FE52
B9FPD4
Q6Z3Z8
Q7XIL7
Q8GZY0
A3BU66
Q0J3A6
C7J6V7
Q6K3Y7
Q7XLL2
Q2QSY8
B9G5Y1
Q5N8V9
Q40720
Q67IW4
Q7G4N4
Q5F1Y8
Q8RYK7
Q6MW89
Q0J0S9
Q69Y83
B9G161
Q2R284
A3CDS1
Q7X7B4
B9FZB8
B9FRG8
B7EE64
C7J0J0
Q10A41
Q8RUQ6
B9GA31
Q65XG7
B9FRV4
C7J9I6
Q6ZLF2
A0A0P0X756
Q0IQ02
Q75L60
A3AKI3
Q2R7Q7
B9FPV5
C7J677
A3BGK3
B9EVM7
B8YEK4
A0A0P0WFA1
Q2R3Q8
Q6MWC1
B9GA75
Q6YPF9
B9F8F2
A0A0P0V2X1
Q6EUN6
Q6YTY8
Q6K790
A7LFZ6
Q53J28
Q2QMA1
Q6YV18
A3CHJ2
A0A0P0V3Q8
A2ZWT1
Q6YYK5
Q5ZBD5
Q6H838
A0A0P0V733
Q7XPT3
Q5Z8W1
Q2R374
A2ZND3
Q5QM50
Q67IW9
B9G764
Q84Z60
A0A0P0VBM0
A0A0P0WFS7
Q8S7N2
Q0JDK3
A0A0P0WUS8
Q8H2Q3
Q2QSC4
A3A9N2
Q7F9C4
Q6K3Q3
A0A0P0WI98
A0A0P0XYR0
A0A0P0X2K1
A2ZXG0
A0A0P0XQY2
B9F2S6
B9FFW1
Q2R2F6
A0A0P0VT62
A0A0P0UZ30
Q6Z954
Q7XN33
Q8LM39
B9ETP1
Q6Z0F1
Q5VR06
Q75HV9
Q5ZAH2
Q75LU6
C7J085
B9G2H9
B9FBT8
Q5H9X5
Q6ETH4
Q7XWL1
Q69P50
A3AW33
B7EKK3
Q0DSN3
H2KX68
A0A0P0UXX1
B9G4P9
A0A0P0V1N4
Q2R4H7
A0A0P0XQT0
B9G6Q4
B9G9N3
B9G9X1
B9F2R3
Q6YYW3
Q84P93
A3AG54
Q6YSW6
Q7XPJ5
A0A0N7KID4
A0MH06
Q0DPZ6
A0A0P0W0S7
Q2QZM2
A3BF39
Q8GZZ8
A0A0P0VNR0
B9FSQ9
A0A0P0WX09
B9FCE6
Q9AX65
A0A0P0XZ46
Q5VQ47
C7J8V6
A3CAF5
Q6YRN8
Q6ZI53
Q5W7C0
Q69LQ3
A0A0P0WC62
A3BFY7
B9FFR1
Q7Y005
A0A0P0VK43
Q8L544
Q8S7H0
Q7XR68
Q5ZDK5
B9G9B0
A0A0P0VFA0
Q8S9Z3
Q339I7
Q6MWA6
Q69TK2
Q0IUP7
B9FMG2
Q2R0C6
B7F5N3
Q108Z3
B9FFS4
B9FLY8
Q0IX14
A0A0P0V975
Q5W653
Q6K3N0
Q0J5E5
Q6ZJP3
Q7G1T9
Q6UUB3
B9EXN7
B9GBR5
A0A0P0W9X9
Q6F2Y6
Q0DU23
Q5Z4I3
A0A0P0X1F1
Q5VNT8
Q5SNH3
A0A0P0VZG5
Q6YZT6
Q10PY0
A0A0P0V4S1
Q0J3B0
Q7XP34
A0A0P0WSU8
Q69SK5
A0A0P0Y1Q7
Q942N9
Q0J7D6
Q5VP50
B9G7B7
C7J306
Q0DIE5
Q75G55
A0A0P0XWE8
Q0INZ2
Q53WP7
B7EJ91
Q53L71
Q5JNB8
[truncated: 11,257 more rows]
