# Supplementary material for: Phosphoproteomic insights into the regulation of root length in rice (Oryza sativa L. cv. KDML 105): uncovering key events and pathways involving phosphorylated proteins
Source: PeerJ. 2025 Jul 4;13:e19361. doi: 10.7717/peerj.19361 (PMC12232931; doi:10.7717/peerj.19361)
Supplement: Supplemental Information 4 — Deep-water culture (DWC), water agar (WA), and vermiculite-based hydroponic (VBH). [file peerj-13-19361-s004.xlsx]

## Sheet: Table S3
Table S3: Significantly different expression of 5 phosphoproteins in rice roots grown in deep-water culture (DWC), water agar (WA), and vermiculite-based hydroponic (VBH) cultivation systems determined by ANOVA with a p-value at 0.1.
ID	f.value	p.value	FDR	Fisher's LSD
Q8H5D5	27.83	5.5923e-07	0.0074125	V_7day - A_7day; V_7day - D_7day
Q0D6I4	18.791	1.2278e-05	0.060771	V_7day - A_7day; V_7day - D_7day
Q5SN55	17.986	1.6872e-05	0.060771	V_7day - A_7day; V_7day - D_7day
Q8L4D3	17.778	1.8339e-05	0.060771	A_7day - D_7day; V_7day - D_7day
Q2R0A3	16.932	2.5917e-05	0.068705	A_7day - D_7day; V_7day - D_7day
