# Supplementary material for: Phosphoproteomic insights into the regulation of root length in rice (Oryza sativa L. cv. KDML 105): uncovering key events and pathways involving phosphorylated proteins
Source: PeerJ. 2025 Jul 4;13:e19361. doi: 10.7717/peerj.19361 (PMC12232931; doi:10.7717/peerj.19361)
Supplement: Supplemental Information 5 [file peerj-13-19361-s005.xlsx]

## Sheet: Table S4
Table S4: Conversion of protein IDs from UniProt into Gene IDs used by the small molecules and protein interaction STITCH database.
Input proteins (Uniport ID) and hormones	STITCH protein ID	STITCH protein name	Identity of protein Sequence2
Q8H5D5	-	-
Q0D6I4	4343217	CTR9 protein homolog	1
Q5SN55	-	-
Q8L4D3	4343930	Heat shock protein DnaJ,	1
Q2R0A3	4351038	Leucine Rich Repeat family protein	1
Abscisic acid	Abscisic acid
Auxin	Auxin
Cytokinin	Cytokinin
Ethylene	Ethylene
Gibberellin	Gibberellin
