# Supplementary material for: Phosphoproteomic insights into the regulation of root length in rice (Oryza sativa L. cv. KDML 105): uncovering key events and pathways involving phosphorylated proteins
Source: PeerJ. 2025 Jul 4;13:e19361. doi: 10.7717/peerj.19361 (PMC12232931; doi:10.7717/peerj.19361)
Supplement: Supplemental Information 6 [file peerj-13-19361-s006.xlsx]

## Sheet: Sheet1
Supplementary Table 5: Raw data on the maximum root length (in cm) of germinated rice seedlings.
	length	group
1	2.7	DWC
2	3.6	DWC
3	3.8	DWC
4	2.3	DWC
5	2.2	DWC
6	4.9	DWC
7	6	DWC
8	3.7	DWC
9	3.4	DWC
10	3.4	DWC
11	2.6	DWC
12	3.1	DWC
13	5.1	DWC
14	6	DWC
15	3.6	DWC
16	4.3	DWC
17	3.6	DWC
18	3.4	DWC
19	3.2	DWC
20	3.2	DWC
21	3.2	DWC
22	5.6	DWC
23	3	DWC
24	2.8	DWC
25	3.7	DWC
26	3.2	DWC
27	2.6	DWC
28	4.7	DWC
29	3.2	DWC
30	3.5	DWC
31	4.7	Agar
32	4.9	Agar
33	5.4	Agar
34	5.2	Agar
35	6.3	Agar
36	4.2	Agar
37	6	Agar
38	4.3	Agar
39	5.5	Agar
40	4.4	Agar
41	6.1	Agar
42	6.3	Agar
43	4.8	Agar
44	5.8	Agar
45	4.3	Agar
46	5.2	Agar
47	6.2	Agar
48	4.7	Agar
49	6.3	Agar
50	3	Agar
51	5	Agar
52	5.4	Agar
53	6.8	Agar
54	5.9	Agar
55	6	Agar
56	6.1	Agar
57	4.3	Agar
58	4.5	Agar
59	5.2	Agar
60	5.1	Agar
61	9.2	Vermi
62	11.6	Vermi
63	8.1	Vermi
64	9	Vermi
65	9.5	Vermi
66	10.5	Vermi
67	9.6	Vermi
68	8.6	Vermi
69	10.4	Vermi
70	10.5	Vermi
71	10.9	Vermi
72	9	Vermi
73	10.4	Vermi
74	10.6	Vermi
75	8.4	Vermi
76	9.3	Vermi
77	10.6	Vermi
78	8.7	Vermi
79	11.4	Vermi
80	10.6	Vermi
81	11.7	Vermi
82	13.3	Vermi
83	10.4	Vermi
84	7.8	Vermi
85	9.8	Vermi
86	10.2	Vermi
87	12.3	Vermi
88	10.2	Vermi
89	8.4	Vermi
90	9	Vermi
