# Supplementary material for: Phosphoproteomic insights into the regulation of root length in rice (Oryza sativa L. cv. KDML 105): uncovering key events and pathways involving phosphorylated proteins
Source: PeerJ. 2025 Jul 4;13:e19361. doi: 10.7717/peerj.19361 (PMC12232931; doi:10.7717/peerj.19361)
Supplement: Supplemental Information 7 [file peerj-13-19361-s007.xlsx]

## Sheet: Sheet1
Supplementary Table 6: Raw data on the root fresh weight (in mg) of germinated rice seedlings.
	weight	group
1	11.3	DWC
2	19	DWC
3	17.8	DWC
4	13.8	DWC
5	16	DWC
6	19.2	DWC
7	21.4	DWC
8	17.3	DWC
9	24.3	DWC
10	22.3	DWC
11	22.7	DWC
12	25.5	DWC
13	17.7	DWC
14	21.2	DWC
15	21.5	DWC
16	19.5	DWC
17	23.6	DWC
18	32.8	DWC
19	23	DWC
20	21.9	DWC
21	15.9	DWC
22	20.2	DWC
23	20.4	DWC
24	25.8	DWC
25	18.3	DWC
26	20.3	DWC
27	16.8	DWC
28	15.7	DWC
29	26.4	DWC
30	11	DWC
31	37.9	WA
32	28.3	WA
33	28.2	WA
34	24.5	WA
35	25.7	WA
36	28.7	WA
37	23	WA
38	22.3	WA
39	24.4	WA
40	30.7	WA
41	32.7	WA
42	47.6	WA
43	30.8	WA
44	45.1	WA
45	27.4	WA
46	27.5	WA
47	17	WA
48	20.2	WA
49	28.7	WA
50	35.4	WA
51	27.9	WA
52	29.1	WA
53	25.6	WA
54	31.1	WA
55	32.7	WA
56	35.4	WA
57	29.9	WA
58	26	WA
59	18.9	WA
60	23.9	WA
61	25.5	VBH
62	52.5	VBH
63	18.6	VBH
64	58	VBH
65	48.2	VBH
66	52.4	VBH
67	35.1	VBH
68	28.2	VBH
69	25.6	VBH
70	40	VBH
71	37	VBH
72	46.8	VBH
73	25.8	VBH
74	39.5	VBH
75	46.7	VBH
76	40.9	VBH
77	34.7	VBH
78	56	VBH
79	41.1	VBH
80	40	VBH
81	49.7	VBH
82	24.5	VBH
83	67.6	VBH
84	45.6	VBH
85	36.7	VBH
86	27.4	VBH
87	34.7	VBH
88	42.5	VBH
89	33.2	VBH
90	28.5	VBH
