# Supplementary material for: Phosphoproteomic insights into the regulation of root length in rice (Oryza sativa L. cv. KDML 105): uncovering key events and pathways involving phosphorylated proteins
Source: PeerJ. 2025 Jul 4;13:e19361. doi: 10.7717/peerj.19361 (PMC12232931; doi:10.7717/peerj.19361)
Supplement: Supplemental Information 8 [file peerj-13-19361-s008.xlsx]

## Sheet: Sheet1
Supplementary Table 7: Raw data on the number of germinating seeds.
	seeds	group
1	30	DWC
2	27	DWC
3	30	DWC
4	30	DWC
5	29	WA
6	30	WA
7	28	WA
8	30	WA
9	30	VBH
10	29	VBH
11	30	VBH
12	27	VBH
