# Supplementary material for: Phosphoproteomic insights into the regulation of root length in rice (Oryza sativa L. cv. KDML 105): uncovering key events and pathways involving phosphorylated proteins
Source: PeerJ. 2025 Jul 4;13:e19361. doi: 10.7717/peerj.19361 (PMC12232931; doi:10.7717/peerj.19361)
Supplement: Supplemental Information 9 [file peerj-13-19361-s009.xlsx]

## Sheet: Sheet1
Supplementary Table 8: Raw data on germination speed and percentage.
Condition	Day01	Day02	Day03	Day04	Day05	Day06	Day07	Total Seeds		Sum of germinated seeds	Germination %
VBH	0	0	7	21	1	1	0	30		30	100
WA	0	0	10	19	0	0	0	30		29	96.6667
DWC	0	0	7	22	1	0	0	30		30	100
